# Supplementary material for: Optical mapping reveals a higher level of genomic architecture of chained fusions in cancer
Source: PubMed Central journal article supplement (PMC5932612; doi:10.1101/gr.227975.117), 2018-05

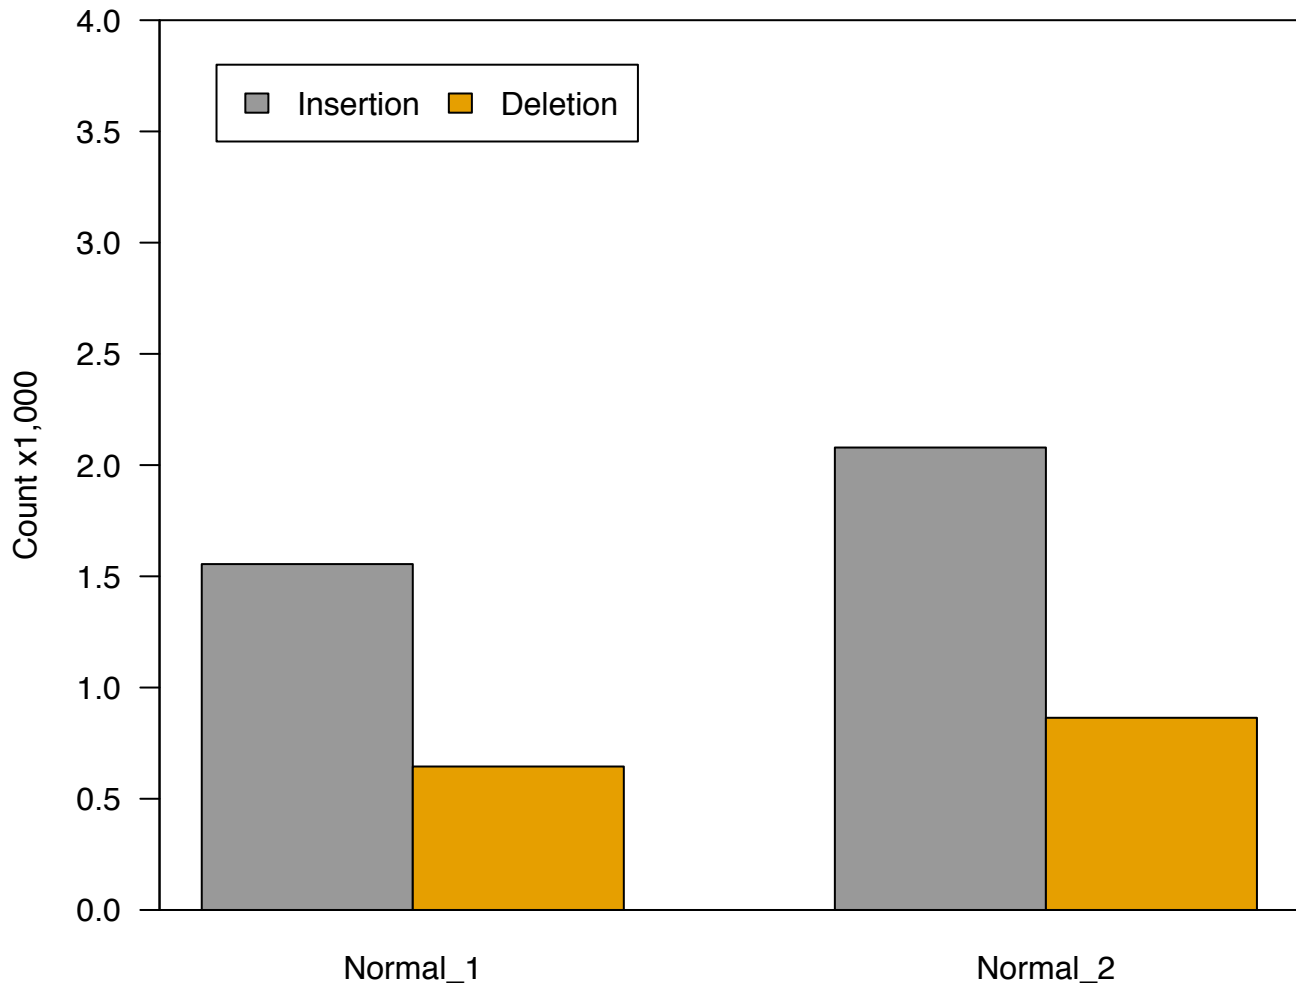

Supplement: supp_gr.227975.117_Supplemental_Fig_S1.pdf [file supp_gr.227975.117_Supplemental_Fig_S1.pdf]
