# Supplementary material for: Optical mapping reveals a higher level of genomic architecture of chained fusions in cancer
Source: Genome Res. 2018 May;28(5):726–38. doi: 10.1101/gr.227975.117 (PMC5932612; doi:10.1101/gr.227975.117)
Supplement: Supplemental Material [file supp_gr.227975.117_Supplemental_Table_S1.xlsx]

## Sheet: Mapping WG Filtered SV
Is Fusion Map	SmapEntryID	GRCh38 Chrom1	GRCh38 Pos1	GRCh38 Chrom2	GRCh38 Pos2	GRCh37 Chrom1	GRCh37 Pos1	GRCh37 Chrom2	GRCh37 Pos2	QryContigID	QryStartPos	QryEndPos	Type	Confidence	LinkID	Zygosity	Genotype	GenotypeGroup	Size	Present_in_%_of_BNG_control_samples	Fail_assembly_chimeric_score	OverlapGenes	NearestNonOverlapGene	NearestNonOverlapGeneDistance	Found_in_self_molecules
FALSE	9	1	931808	1	940927	1	867188	1	876307	6761	269764	280258	insertion	1	-1	heterozygous	1	-1	1376	41.7	not_applicable	SAMD11	NOC2L	3276	yes
FALSE	10	1	1264345	1	1296100	1	1199725	1	1231480	2571	965898	1.00075e+06	insertion	1	-1	homozygous	1	4	3098	22.5	not_applicable	UBE2J2;SCNN1D;ACAP3	MIR6726	10	yes
FALSE	11	1	1426555	1	1432511	1	1361935	1	1367891	2571	826652	833936	insertion	1	-1	homozygous	1	5	1327	77.5	not_applicable	TMEM88B	VWA1	3012	yes
FALSE	12	1	1264345	1	1296100	1	1199725	1	1231480	2572	965446	1.0003e+06	insertion	1	-1	homozygous	1	4	3099	22.5	not_applicable	UBE2J2;SCNN1D;ACAP3	MIR6726	10	yes
FALSE	13	1	1426555	1	1432511	1	1361935	1	1367891	2572	826200	833483	insertion	1	-1	homozygous	1	5	1327	77.5	not_applicable	TMEM88B	VWA1	3012	yes
FALSE	15	1	2854565	1	2868951	1	2771130	1	2785516	26980	132993	148610	insertion	1	-1	heterozygous	1	-1	1230	60.9	not_applicable	-	TTC34	64901	yes
FALSE	16	1	3458504	1	3502328	1	3375068	1	3418892	311	804754	854614	insertion	1	-1	homozygous	1	7	6035	88.1	not_applicable	ARHGEF16;MEGF6	PRDM16	19884	yes
FALSE	17	1	3582180	1	3594027	1	3498744	1	3510591	311	935057	948948	insertion	1	-1	homozygous	1	8	2044	55	not_applicable	MEGF6	MIR551A	21391	yes
FALSE	18	1	4329244	1	4350952	1	4389304	1	4411012	311	1.68853e+06	1712663	insertion	1	-1	heterozygous	1	-1	2423	51.7	not_applicable	-	DQ594820	30968	yes
FALSE	19	1	3458504	1	3502328	1	3375068	1	3418892	312	898585	948444	insertion	1	-1	homozygous	1	7	6036	88.1	not_applicable	ARHGEF16;MEGF6	PRDM16	19884	yes
FALSE	20	1	3582180	1	3594027	1	3498744	1	3510591	312	1.02889e+06	1.04278e+06	insertion	1	-1	homozygous	1	8	2045	54.3	not_applicable	MEGF6	MIR551A	21391	yes
FALSE	21	1	5383496	1	5388670	1	5443556	1	5448730	6991	25548.9	35783.4	insertion	1	-1	homozygous	1	10	5061	94	not_applicable	-	DQ593458	49628	yes
FALSE	22	1	5383496	1	5388670	1	5443556	1	5448730	6992	25548.9	35783.4	insertion	1	-1	homozygous	1	10	5061	94	not_applicable	-	DQ593458	49628	yes
FALSE	24	1	7518333	1	7520564	1	7578393	1	7580624	9020	288994	292684	insertion	1	-1	homozygous	1	-1	1459	88.1	not_applicable	CAMTA1	VAMP3	250705	yes
FALSE	25	1	9615159	1	9628763	1	9675217	1	9688821	1881	547024	567072	insertion	1	-1	homozygous	1	11	6443	93.4	not_applicable	-	TMEM201	283	yes
FALSE	26	1	9615159	1	9628763	1	9675217	1	9688821	1882	547024	567072	insertion	1	-1	homozygous	1	11	6443	93.4	not_applicable	-	TMEM201	283	yes
FALSE	27	1	10969439	1	10971543	1	11029496	1	11031600	3051	340151	344129	insertion	1	-1	homozygous	1	12	1874	92.7	not_applicable	C1orf127	TARDBP	41079	yes
FALSE	28	1	10969439	1	10971543	1	11029496	1	11031600	3052	340151	344129	insertion	1	-1	homozygous	1	12	1874	92.7	not_applicable	C1orf127	TARDBP	41079	yes
FALSE	29	1	11522371	1	11532386	1	11582428	1	11592443	2811	558984	570200	insertion	1	-1	homozygous	1	13	1201	67.5	not_applicable	PTCHD2	U02063	30298	yes
FALSE	30	1	11522371	1	11532386	1	11582428	1	11592443	2812	558984	570200	insertion	1	-1	homozygous	1	13	1201	67.5	not_applicable	PTCHD2	U02063	30298	yes
FALSE	31	1	1.41071e+07	1	14113349	1	14433571	1	14439844	981	714185	718402	deletion	1	-1	homozygous	1	14	2057	39.1	not_applicable	-	DQ580215	86996.5	yes
FALSE	32	1	1.41071e+07	1	14113349	1	14433571	1	14439844	982	714185	718402	deletion	1	-1	homozygous	1	14	2057	39.1	not_applicable	-	DQ580215	86996.5	yes
FALSE	46	1	1.72809e+07	1	1.72961e+07	1	17607441	1	17622642	1381	22050.5	39723.8	insertion	0.99	-1	homozygous	1	18	2472	45	not_applicable	PADI3	MIR3972	2971.5	yes
FALSE	47	1	18039043	1	18063412	1	18365537	1	18389906	1381	787154	816453	insertion	1	-1	homozygous	1	19	4930	98.7	not_applicable	-	IGSF21	44334	yes
FALSE	48	1	1.72809e+07	1	1.72961e+07	1	17607441	1	17622642	1382	22050.5	39723.8	insertion	1	-1	homozygous	1	18	2472	45	not_applicable	PADI3	MIR3972	2971.5	yes
FALSE	49	1	17348236	1	17359357	1	17674731	1	17685852	1382	92150.9	101436	deletion	0.98	-1	heterozygous	1	-1	1835	27.2	not_applicable	PADI4	PADI6	12889	yes
FALSE	50	1	18039043	1	18063412	1	18365537	1	18389906	1382	785611	814910	insertion	1	-1	homozygous	1	19	4929	98.7	not_applicable	-	IGSF21	44334	yes
FALSE	53	1	19061218	1	19084292	1	19387712	1	19410786	4880	38181	65116.2	insertion	1	-1	homozygous	1	-1	3861	92.1	not_applicable	UBR4	IFFO2	104887	yes
FALSE	54	1	22575688	1	22585864	1	22902181	1	22912357	661	1.03685e+06	1.04868e+06	insertion	1	-1	homozygous	1	20	1653	98.7	not_applicable	EPHA8	ZBTB40	44532	yes
FALSE	55	1	2.32741e+07	1	23295959	1	23600564	1	23622452	661	1.73943e+06	1.76881e+06	insertion	1	-1	homozygous	1	21	7493	96.7	not_applicable	-	HNRNPR	13824	yes
FALSE	56	1	23389855	1	23395022	1	23716348	1	23721515	661	1.86289e+06	1.86955e+06	insertion	1	-1	homozygous	1	22	1490	95.4	not_applicable	TCEA3;DQ580215	DQ600650	15450	yes
FALSE	57	1	22575688	1	22585864	1	22902181	1	22912357	662	1.03685e+06	1.04868e+06	insertion	1	-1	homozygous	1	20	1653	98.7	not_applicable	EPHA8	ZBTB40	44532	yes
FALSE	58	1	2.32741e+07	1	23295959	1	23600564	1	23622452	662	1.73943e+06	1.76881e+06	insertion	1	-1	homozygous	1	21	7493	96.7	not_applicable	-	HNRNPR	13824	yes
FALSE	59	1	23389855	1	23395022	1	23716348	1	23721515	662	1.86289e+06	1.86955e+06	insertion	1	-1	homozygous	1	22	1490	95.4	not_applicable	TCEA3;DQ580215	DQ600650	15450	yes
FALSE	66	1	27074447	1	27107670	1	27400938	1	27434161	181	583858	619774	insertion	1	-1	homozygous	1	25	2692	97.4	not_applicable	SLC9A1	DQ586320	9102	yes
FALSE	68	1	27074447	1	27107670	1	27400938	1	27434161	182	583858	619774	insertion	1	-1	homozygous	1	25	2692	97.4	not_applicable	SLC9A1	DQ586320	9102	yes
FALSE	69	1	3.03889e+07	1	30415315	1	30861754	1	30888162	441	1.42883e+06	1.46067e+06	insertion	1	-1	homozygous	1	26	5431	65.6	not_applicable	-	DQ571320	42149.2	yes
FALSE	71	1	30731168	1	30737997	1	31204015	1	31210844	441	1.10128e+06	1.11082e+06	insertion	1	-1	homozygous	1	28	2711	96	not_applicable	LAPTM5	MIR4420	1159	yes
FALSE	72	1	31429636	1	31460799	1	31902483	1	31933646	441	372569	408013	insertion	1	-1	homozygous	1	29	4281	64.2	not_applicable	SERINC2	LINC01225	45416	yes
FALSE	73	1	3.03884e+07	1	3.0412e+07	1	30861200	1	30884866	442	1431944	1.46136e+06	insertion	1	-1	homozygous	1	26	5745	65.6	not_applicable	-	DQ571320	41594.5	yes
FALSE	74	1	30650426	1	30671011	1	31123273	1	31143858	442	1.17133e+06	1.19406e+06	insertion	1	-1	heterozygous	2	27	2146	85.4	not_applicable	-	MATN1	40266	yes
FALSE	75	1	30731168	1	30737997	1	31204015	1	31210844	442	1.10128e+06	1.11082e+06	insertion	1	-1	homozygous	1	28	2711	96	not_applicable	LAPTM5	MIR4420	1159	yes
FALSE	77	1	31429636	1	31460799	1	31902483	1	31933646	442	372569	408013	insertion	1	-1	homozygous	1	29	4281	64.2	not_applicable	SERINC2	LINC01225	45416	yes
FALSE	78	1	33181127	1	33188977	1	33646728	1	33654578	4111	297345	307013	insertion	1	-1	homozygous	1	30	1818	95.4	not_applicable	TRIM62	AX747064	37898	yes
FALSE	79	1	33181127	1	33188977	1	33646728	1	33654578	4112	297345	307013	insertion	1	-1	homozygous	1	30	1818	95.4	not_applicable	TRIM62	AX747064	37898	yes
FALSE	82	1	35155265	1	35157885	1	35620866	1	35623486	30801	153582	157261	insertion	1	-1	heterozygous	1	32	1058	59.6	not_applicable	-	AL831889	18495	yes
FALSE	83	1	35155265	1	35157885	1	35620866	1	35623486	31030	153906	157610	insertion	1	-1	heterozygous	1	32	1083	59.6	not_applicable	-	AL831889	18495	yes
FALSE	86	1	37758411	1	3.77857e+07	1	38224083	1	38251391	6220	334757	364530	insertion	0.99	-1	homozygous	1	-1	2466	72.8	not_applicable	EPHA10	MANEAL	8383.5	yes
FALSE	87	1	38945353	1	38959631	1	39411025	1	39425303	21091	159483	175714	insertion	1	-1	homozygous	1	33	1952	79.5	not_applicable	-	RHBDL2	3570	yes
FALSE	88	1	38945353	1	38959631	1	39411025	1	39425303	21092	159483	175714	insertion	1	-1	homozygous	1	33	1952	79.5	not_applicable	-	RHBDL2	3570	yes
FALSE	89	1	45692284	1	4.57141e+07	1	46157956	1	46179812	22851	767600	794569	insertion	1	-1	homozygous	1	34	5114	95.4	not_applicable	TMEM69;IPP	GPBP1L1	5655	yes
FALSE	90	1	45692284	1	4.57141e+07	1	46157956	1	46179812	22852	767600	794569	insertion	1	-1	homozygous	1	34	5114	95.4	not_applicable	TMEM69;IPP	GPBP1L1	5655	yes
FALSE	93	1	51903590	1	51919364	1	52369262	1	52385036	26261	258892	280977	insertion	1	-1	homozygous	1	35	6310	67.5	not_applicable	RAB3B	NRD1	24654	yes
FALSE	94	1	53126296	1	53129986	1	53591968	1	53595658	26261	1.48879e+06	1.49121e+06	deletion	0.98	-1	heterozygous	1	-1	1265	17.9	not_applicable	SLC1A7	AX748428	7688	yes
FALSE	95	1	51903590	1	51919364	1	52369262	1	52385036	26262	258892	278262	insertion	1	-1	homozygous	1	35	3596	78.1	not_applicable	RAB3B	NRD1	24654	yes
FALSE	96	1	55236944	1	5.52435e+07	1	55702617	1	55709200	131	1.59325e+06	1.60152e+06	insertion	1	-1	homozygous	1	36	1687	86.1	not_applicable	-	MIR4422	11222	yes
FALSE	97	1	56365012	1	56377267	1	56830684	1	56842939	131	461517	469901	deletion	1	-1	homozygous	1	37	3872	66.2	not_applicable	-	L13714	44847	yes
FALSE	98	1	55236944	1	5.52435e+07	1	55702617	1	55709200	132	1.59325e+06	1.60152e+06	insertion	1	-1	homozygous	1	36	1687	86.1	not_applicable	-	MIR4422	11222	yes
FALSE	99	1	56365012	1	56377267	1	56830684	1	56842939	132	461517	469901	deletion	1	-1	homozygous	1	37	3872	66.2	not_applicable	-	L13714	44847	yes
FALSE	100	1	57126102	1	57139589	1	57591775	1	57605262	4841	286813	302342	insertion	1	-1	homozygous	1	38	2043	9.9	not_applicable	DAB1	C8B	159963	yes
FALSE	101	1	57126102	1	57139589	1	57591775	1	57605262	4842	286813	302342	insertion	1	-1	homozygous	1	38	2043	9.9	not_applicable	DAB1	C8B	159963	yes
FALSE	102	1	61392693	1	61407351	1	61858365	1	61873023	4811	728862	745383	insertion	1	-1	homozygous	1	39	1864	72.2	not_applicable	NFIA	JC172329	73108	yes
FALSE	103	1	61392693	1	61407351	1	61858365	1	61873023	4812	728862	745383	insertion	1	-1	homozygous	1	39	1864	72.2	not_applicable	NFIA	JC172329	73108	yes
FALSE	104	1	63234311	1	63247301	1	63699982	1	63712972	24272	532331	542356	deletion	1	-1	heterozygous	1	-1	2965	28.5	not_applicable	LINC00466;7SK	JC172250	59101	yes
FALSE	106	1	70819060	1	70835455	1	71284743	1	71301138	9052	140739	164266	insertion	1	-1	heterozygous	1	-1	7133	0.7	not_applicable	-	BC041441	32593	yes
FALSE	107	1	71926663	1	71930173	1	72392346	1	72395856	15982	258356	263355	insertion	1	-1	heterozygous	1	-1	1489	0.7	not_applicable	NEGR1	NEGR1-IT1	89652	yes
FALSE	109	1	73112725	1	73153143	1	73578408	1	73618826	28122	1096639	1.14485e+06	insertion	1	-1	homozygous	1	41	7793	66.2	not_applicable	-	DQ593458	116881	yes
FALSE	112	1	73112725	1	73153143	1	73578408	1	73618826	28121	1096639	1.14485e+06	insertion	1	-1	homozygous	1	41	7793	66.2	not_applicable	-	DQ593458	116881	yes
FALSE	115	1	74719481	1	74728535	1	75185165	1	75194219	28121	2.69996e+06	2.71262e+06	insertion	1	-1	heterozygous	1	-1	3603	18.5	not_applicable	CRYZ	TYW3	4617	yes
FALSE	116	1	79757214	1	79763767	1	80222899	1	80229452	671	112224	117580	deletion	0.99	-1	homozygous	1	43	1196	9.3	not_applicable	-	DQ597498	195940	yes
FALSE	117	1	79757214	1	79763767	1	80222899	1	80229452	672	112224	117580	deletion	0.99	-1	homozygous	1	43	1196	9.3	not_applicable	-	DQ597498	195940	yes
FALSE	118	1	80931576	1	80943725	1	81397261	1	81409410	301	1.80862e+06	1.81426e+06	deletion	1	-1	homozygous	1	44	6502	62.3	not_applicable	-	L13714	706658	yes
FALSE	120	1	82251962	1	82278717	1	82717646	1	82744401	301	476209	505824	insertion	1	-1	homozygous	1	45	2859	83.4	not_applicable	-	DQ594187	81764	yes
FALSE	122	1	80931576	1	80943725	1	81397261	1	81409410	302	1.80862e+06	1.81426e+06	deletion	1	-1	homozygous	1	44	6502	62.3	not_applicable	-	L13714	706658	yes
FALSE	124	1	82251962	1	82278717	1	82717646	1	82744401	302	476209	505824	insertion	1	-1	homozygous	1	45	2859	83.4	not_applicable	-	DQ594187	81764	yes
FALSE	126	1	87044956	1	87055194	1	87510639	1	87520877	1322	762940	775272	insertion	1	-1	homozygous	1	46	2094	72.8	not_applicable	HS2ST1	BC132861	76803	yes
FALSE	127	1	87044956	1	87055194	1	87510639	1	87520877	1321	738532	750864	insertion	1	-1	homozygous	1	46	2094	72.8	not_applicable	HS2ST1	BC132861	76803	yes
FALSE	128	1	88504715	1	88513398	1	88970398	1	88979081	24301	372810	385511	insertion	1	-1	homozygous	1	47	4018	37.1	not_applicable	-	L07266	25644	yes
FALSE	129	1	88231202	1	88237248	1	88696885	1	88702931	24302	653746	658621	deletion	0.99	-1	heterozygous	1	-1	1172	1.3	not_applicable	-	Metazoa_SRP	240580	yes
FALSE	130	1	88504715	1	88513398	1	88970398	1	88979081	24302	372810	385511	insertion	1	-1	homozygous	1	47	4018	37.1	not_applicable	-	L07266	25644	yes
FALSE	131	1	93877728	1	93889124	1	94343284	1	94354680	24651	277300	290275	insertion	1	-1	homozygous	1	48	1578	77.5	not_applicable	DNTTIP2;GCLM	AX746627	23398	yes
FALSE	132	1	93877728	1	93889124	1	94343284	1	94354680	24652	277300	290275	insertion	1	-1	homozygous	1	48	1578	77.5	not_applicable	DNTTIP2;GCLM	AX746627	23398	yes
FALSE	136	1	101506150	1	101538512	1	101971706	1	102004068	11712	149465	184560	insertion	0.99	-1	heterozygous	1	-1	2733	31.1	not_applicable	-	Mir_584	225134	yes
FALSE	140	1	103936432	1	103943798	1	104479054	1	104486420	12840	499851	512059	insertion	1	-1	homozygous	1	-1	4842	85.4	not_applicable	-	JC172329	81933	yes
FALSE	146	1	110117832	1	110120694	1	110660454	1	110663316	21522	91511	99475.7	insertion	1	-1	heterozygous	1	52	5102	92.7	not_applicable	-	UBL4B	3886	yes
FALSE	148	1	110117832	1	110120694	1	110660454	1	110663316	21521	108137	114260	insertion	1	-1	heterozygous	2	52	3260	94.7	not_applicable	-	UBL4B	3886	yes
FALSE	150	1	111351392	1	111357714	1	111894014	1	111900336	8270	163868	172068	insertion	1	-1	homozygous	1	-1	1878	41.7	not_applicable	PIFO	PGCP1	26805	yes
FALSE	151	1	111792759	1	111799818	1	112335381	1	112342440	15802	199914	209484	insertion	1	-1	heterozygous	1	-1	2510	0	not_applicable	KCND3	DQ586320	449	yes
FALSE	152	1	1.1229e+08	1	1.12299e+08	1	112832653	1	112841518	22381	2.78952e+06	2.79602e+06	deletion	1	-1	homozygous	1	53	2368	81.5	not_applicable	DQ586320	SnoU13	72108.5	yes
FALSE	153	1	1.1229e+08	1	1.12299e+08	1	112832653	1	112841518	22382	2.78145e+06	2.78795e+06	deletion	1	-1	homozygous	1	53	2368	81.5	not_applicable	DQ586320	SnoU13	72108.5	yes
FALSE	154	1	113053134	1	1.13073e+08	1	113595756	1	113615680	22382	2.00622e+06	2.02392e+06	deletion	1	-1	heterozygous	1	-1	2226	35.8	not_applicable	RP11-31F15.2;DQ588547;DQ601422;DQ586320	LRIG2	151.5	yes
FALSE	157	1	1.1568e+08	1	115690301	1	116222872	1	116232922	4381	379582	386249	deletion	1	-1	heterozygous	1	-1	3383	27.8	not_applicable	VANGL1	CASQ2	9704	yes
FALSE	158	1	116429159	1	116440819	1	116971781	1	116983441	30121	202240	216359	insertion	1	-1	homozygous	1	54	2459	58.3	not_applicable	-	DQ587130	925	yes
FALSE	159	1	116429159	1	116440819	1	116971781	1	116983441	30122	202240	216359	insertion	1	-1	homozygous	1	54	2459	58.3	not_applicable	-	DQ587130	925	yes
FALSE	160	1	117335019	1	117342121	1	117877641	1	117884743	30122	1.11143e+06	1.11732e+06	deletion	0.99	-1	heterozygous	1	-1	1216	7.9	not_applicable	-	MAN1A2	25342	yes
FALSE	161	1	118359547	1	118389849	1	118902170	1	118932472	6102	607707	641112	insertion	1	-1	homozygous	1	55	3103	77.5	not_applicable	-	DQ587130	32453	yes
FALSE	162	1	118359547	1	118389849	1	118902170	1	118932472	6101	615229	648039	insertion	1	-1	homozygous	1	55	2508	80.8	not_applicable	-	DQ587130	32453	yes
FALSE	166	1	152206700	1	152228831	1	152179176	1	152201307	1121	359293	395828	insertion	1	-1	homozygous	1	57	14404	28.5	not_applicable	HRNR	DQ598327	9515	yes
FALSE	169	1	152206700	1	152228831	1	152179176	1	152201307	1122	359293	395828	insertion	1	-1	homozygous	1	57	14404	28.5	not_applicable	HRNR	DQ598327	9515	yes
FALSE	172	1	154707561	1	154717460	1	154680037	1	154689936	12360	191821	204115	insertion	1	-1	homozygous	1	-1	2395	99.3	not_applicable	KCNN3	DQ596630	28931	yes
FALSE	173	1	1.56541e+08	1	156559778	1	156510402	1	156529570	5451	133461	150229	deletion	1	-1	homozygous	1	59	2401	90.7	not_applicable	IQGAP3;DQ586320	TTC24	19949	yes
FALSE	174	1	1.56541e+08	1	156559778	1	156510402	1	156529570	5452	133461	150229	deletion	1	-1	homozygous	1	59	2401	90.7	not_applicable	IQGAP3;DQ586320	TTC24	19949	yes
FALSE	178	1	163097136	1	163111177	1	163066926	1	163080967	28251	138318	150662	deletion	0.99	-1	homozygous	1	61	1698	0	not_applicable	-	RGS4	20335	yes
FALSE	180	1	163097136	1	163111177	1	163066926	1	163080967	28252	138318	150662	deletion	0.99	-1	homozygous	1	61	1698	0	not_applicable	-	RGS4	20335	yes
FALSE	181	1	165891678	1	165892752	1	165860915	1	165861989	9880	74009.5	77511.2	insertion	1	-1	homozygous	1	-1	2428	29.1	not_applicable	UCK2	BC071770	116231	yes
FALSE	182	1	1.67196e+08	1	1.67212e+08	1	167165069	1	167181363	3182	1.44213e+06	1.46267e+06	insertion	1	-1	homozygous	1	62	4250	79.5	not_applicable	-	RBSG4	27.5	yes
FALSE	183	1	168408588	1	168415964	1	168377826	1	168385202	3182	235880	244745	insertion	1	-1	homozygous	1	63	1490	85.4	not_applicable	RP5-968D22.1	MIR557	32968	yes
FALSE	184	1	168466233	1	168474767	1	168435471	1	168444005	3182	175459	185747	insertion	1	-1	homozygous	1	64	1753	71.5	not_applicable	AF085892	RP5-968D22.1	43578	yes
FALSE	185	1	1.67196e+08	1	1.67212e+08	1	167165069	1	167181363	3181	1.44213e+06	1.46267e+06	insertion	1	-1	homozygous	1	62	4250	79.5	not_applicable	-	RBSG4	27.5	yes
FALSE	186	1	168408588	1	168415964	1	168377826	1	168385202	3181	235880	244745	insertion	1	-1	homozygous	1	63	1490	85.4	not_applicable	RP5-968D22.1	MIR557	32968	yes
FALSE	187	1	168466233	1	168474767	1	168435471	1	168444005	3181	175459	185747	insertion	1	-1	homozygous	1	64	1753	71.5	not_applicable	AF085892	RP5-968D22.1	43578	yes
FALSE	188	1	169085783	1	1.6909e+08	1	169055021	1	169059391	1431	390890	396272	insertion	1	-1	heterozygous	1	-1	1013	20.5	not_applicable	LINC00970	ATP1B1	16556.5	yes
FALSE	189	1	169255665	1	169283933	1	169224903	1	169253171	1431	560644	566913	deletion	1	-1	homozygous	1	65	21998	15.2	not_applicable	NME7;DQ587130	DQ596631	52679	yes
FALSE	190	1	169255665	1	169283933	1	169224903	1	169253171	1432	560011	566280	deletion	1	-1	homozygous	1	65	21998	15.2	not_applicable	NME7;DQ587130	DQ596631	52679	yes
TRUE	191	1	171723928	10	7904188	1	171693068	10	7946151	29220	111661	116843	translocation_interchr	0.44	-1	unknown	-1	66	-1	0	fail	VAMP4;TAF3	DQ578550	30492	yes
TRUE	193	1	172788320	1	189139998	1	172757460	1	189109129	23121	3.62831e+06	4.01734e+06	translocation_intrachr	0	-1	heterozygous	1	67	-1	0	pass	-	DQ578393	9673	yes
TRUE	194	1	171723928	10	10467545	1	171693068	10	10509508	23121	2.3979e+06	2.1396e+06	translocation_interchr	0	-1	unknown	-1	66	-1	0	pass	VAMP4	DQ578550	30492	yes
TRUE	195	1	172788320	20	428758	1	172757460	20	409402	23121	3.62831e+06	3.77302e+06	translocation_interchr	0	-1	unknown	-1	67	-1	0	pass	RBCK1	TBC1D20	6722	yes
TRUE	196	1	172788320	1	189139998	1	172757460	1	189109129	23122	2.05842e+06	2.44745e+06	translocation_intrachr	0	-1	heterozygous	1	67	-1	0	pass	-	DQ578393	9673	yes
TRUE	197	1	171723928	10	10467545	1	171693068	10	10509508	23122	994602	736300	translocation_interchr	0	-1	unknown	-1	66	-1	0	pass	VAMP4	DQ578550	30492	yes
TRUE	198	1	172788320	20	428758	1	172757460	20	409402	23122	2.05842e+06	2.20313e+06	translocation_interchr	0	-1	heterozygous	1	-1	-1	0	pass	RBCK1	TBC1D20	6722	yes
TRUE	201	1	1.72423e+08	1	172618626	1	172391996	1	172587766	29121	298912	880485	insertion	0.91	-1	heterozygous	1	69	385803	0	not_applicable	C1orf105;PIGC;SUCO;DQ586451;DQ601422	DNM3	10139.5	yes
TRUE	202	1	1.72423e+08	1	188399318	1	172391996	1	188368449	29121	880485	868836	translocation_intrachr	0.01	-1	unknown	-1	70	-1	0	pass	C1orf105	DNM3	10139.5	yes
TRUE	203	1	1.72423e+08	1	172618626	1	172391996	1	172587766	29122	298912	880485	insertion	0.91	-1	heterozygous	1	69	385803	0	not_applicable	C1orf105;PIGC;SUCO;DQ586451;DQ601422	DNM3	10139.5	yes
TRUE	204	1	1.72423e+08	1	188399318	1	172391996	1	188368449	29122	880485	868836	translocation_intrachr	0.01	-1	unknown	-1	70	-1	0	pass	C1orf105	DNM3	10139.5	yes
TRUE	205	1	172403578	1	188772032	1	172372718	1	188741163	28991	479184	331485	translocation_intrachr	0	-1	unknown	-1	70	-1	0	pass	DNM3	C1orf105	17110	yes
TRUE	206	1	172558180	15	91971549	1	172527320	15	92514779	28991	633934	754657	translocation_interchr	0	-1	unknown	-1	71	-1	0	pass	SUCO;SLCO3A1	DQ586451	13370	yes
TRUE	207	1	172558180	15	91974535	1	172527320	15	92517765	28992	236648	359213	translocation_interchr	0	-1	unknown	-1	71	-1	0	pass	SUCO;SLCO3A1	DQ586451	13370	yes
TRUE	208	1	172618626	1	188314786	1	172587766	1	188283917	29121	298912	784662	translocation_intrachr	0	-1	unknown	-1	71	-1	0	pass	-	SUCO	6794	yes
TRUE	209	1	172618626	15	98573356	1	172587766	15	99116585	29121	298912	591642	translocation_interchr	0	-1	unknown	-1	71	-1	0	pass	-	SUCO	6794	yes
TRUE	210	1	172618626	1	188314786	1	172587766	1	188283917	29122	298912	784662	translocation_intrachr	0	-1	unknown	-1	71	-1	0	pass	-	SUCO	6794	yes
TRUE	211	1	172618626	15	98573356	1	172587766	15	99116585	29122	298912	591642	translocation_interchr	0	-1	unknown	-1	71	-1	0	pass	-	SUCO	6794	yes
FALSE	213	1	175650102	1	175657086	1	175619238	1	175626222	7191	765724	774200	insertion	1	-1	homozygous	1	72	1491	41.1	not_applicable	TNR	AK093214	86234	yes
FALSE	214	1	175650102	1	175657086	1	175619238	1	175626222	7192	744762	753237	insertion	1	-1	homozygous	1	72	1492	41.1	not_applicable	TNR	AK093214	86234	yes
FALSE	215	1	179595093	1	179607026	1	179564228	1	179576161	11061	209641	227826	insertion	1	-1	heterozygous	1	-1	6253	23.2	not_applicable	TDRD5	DQ578586	5223	yes
TRUE	216	1	181960541	9	84191373	1	181929676	9	86806288	29021	1.43248e+06	1.45629e+06	translocation_interchr	0	-1	unknown	-1	73	-1	0	pass	-	L13714	23627	yes
TRUE	217	1	181865653	20	1327930	1	181834788	20	1308574	29021	1.33812e+06	1.17894e+06	translocation_interchr	0	-1	unknown	-1	73	-1	0	pass	SDCBP2-AS1	SDCBP2	2062	yes
TRUE	218	1	181960541	9	84191373	1	181929676	9	86806288	29022	1.43248e+06	1.45629e+06	translocation_interchr	0	-1	unknown	-1	73	-1	0	pass	-	L13714	23627	yes
TRUE	219	1	181865653	20	1327930	1	181834788	20	1308574	29022	1.33812e+06	1.17894e+06	translocation_interchr	0	-1	unknown	-1	73	-1	0	pass	SDCBP2-AS1	SDCBP2	2062	yes
TRUE	220	1	181865653	1	188399318	1	181834788	1	188368449	31430	119416	102642	translocation_intrachr	0.76	-1	unknown	-1	73	-1	0	pass	-	U02063	5401	yes
TRUE	221	1	181960541	9	84191373	1	181929676	9	86806288	31430	213864	237715	translocation_interchr	0.79	-1	heterozygous	1	-1	-1	0	pass	-	L13714	23627	yes
FALSE	222	1	182290164	1	182313863	1	182259299	1	182282998	8070	69594.1	96218.6	insertion	1	-1	homozygous	1	-1	2925	49	not_applicable	GS1-122H1.2	DQ571824	8672	yes
FALSE	223	1	184842858	1	184856981	1	184811992	1	184826115	22261	1.91673e+06	1.9248e+06	deletion	1	-1	heterozygous	1	74	6050	49.7	not_applicable	FAM129A	DQ578736	59176	yes
FALSE	225	1	184842858	1	184873418	1	184811992	1	184842552	22262	1.90033e+06	1.9248e+06	deletion	1	-1	heterozygous	2	74	6090	49.7	not_applicable	FAM129A	DQ578736	59176	yes
TRUE	227	1	186050468	1	194829781	1	186019600	1	194798911	22951	301134	262899	translocation_intrachr	0.02	-1	unknown	-1	76	-1	0	pass	HMCN1	DQ580215	90603	yes
TRUE	228	1	185876996	5	41929723	1	185846128	5	41929825	22951	474103	521300	translocation_interchr	0.1	-1	heterozygous	1	77	-1	0	pass	HMCN1;FBXO4	C5orf51	8088	yes
TRUE	229	1	186050468	1	194829781	1	186019600	1	194798911	22952	301134	262899	translocation_intrachr	0	-1	unknown	-1	76	-1	0	pass	HMCN1	DQ580215	90603	yes
TRUE	230	1	185876996	5	41929723	1	185846128	5	41929825	22952	474103	521300	translocation_interchr	0.01	-1	heterozygous	1	77	-1	0	pass	HMCN1;FBXO4	C5orf51	8088	yes
TRUE	231	1	186282560	9	76751978	1	186251692	9	79366894	23121	1.40332e+06	1383701	translocation_interchr	0	-1	unknown	-1	78	-1	0	pass	PRUNE2	PCA3	12460	yes
TRUE	232	1	186029881	10	10920432	1	185999013	10	10962395	23121	1.65544e+06	1.68709e+06	translocation_interchr	0	-1	unknown	-1	76	-1	0	pass	HMCN1	LINC00710	14508	yes
TRUE	233	1	186029881	10	10920432	1	185999013	10	10962395	23122	252136	283794	translocation_interchr	0	-1	unknown	-1	76	-1	0	pass	HMCN1	LINC00710	14508	yes
TRUE	234	1	186282560	9	76751978	1	186251692	9	79366894	28910	449370	468872	translocation_interchr	0.29	-1	unknown	-1	78	-1	0	pass	PRUNE2	PCA3	12460	yes
TRUE	235	1	186029881	10	10920432	1	185999013	10	10962395	28910	197536	165807	translocation_interchr	0	-1	unknown	-1	76	-1	0	pass	HMCN1	LINC00710	14508	yes
TRUE	236	1	186282560	9	76751978	1	186251692	9	79366894	32740	137373	157092	translocation_interchr	0.34	-1	unknown	-1	78	-1	0	fail	PRUNE2	PCA3	12460	yes
TRUE	237	1	186438582	12	65480287	1	186407714	12	65874067	28131	794088	502892	translocation_interchr	0	-1	unknown	-1	79	-1	0	pass	-	DQ593458	3626	yes
TRUE	238	1	186315879	13	74349013	1	186285011	13	74923150	28131	916045	1.11273e+06	translocation_interchr	0	-1	unknown	-1	78	-1	0	pass	TPR	PRG4	1324	yes
TRUE	239	1	186438582	12	65480287	1	186407714	12	65874067	28132	794088	502892	translocation_interchr	0	-1	unknown	-1	79	-1	0	pass	-	DQ593458	3626	yes
TRUE	240	1	186315879	13	74349013	1	186285011	13	74923150	28132	916045	1.11273e+06	translocation_interchr	0	-1	unknown	-1	78	-1	0	pass	TPR	PRG4	1324	yes
TRUE	241	1	186401346	15	99364779	1	186370478	15	99904984	24581	3.39567e+06	3.1249e+06	translocation_interchr	0	-1	unknown	-1	79	-1	0	pass	C1orf27;OCLM;LRRC28	TPR	26022	yes
TRUE	242	1	186401346	15	99364779	1	186370478	15	99904984	24582	3.3885e+06	3.11774e+06	translocation_interchr	0	-1	unknown	-1	79	-1	0	pass	C1orf27;OCLM;LRRC28	TPR	26022	yes
FALSE	243	1	187491103	1	187498423	1	187460235	1	187467555	31221	879713	885318	deletion	0.98	-1	heterozygous	1	-1	1716	60.3	not_applicable	-	BC140721	142803	yes
TRUE	244	1	188188529	21	41541724	1	188157660	21	42913651	22721	1.04913e+06	1086601	translocation_interchr	0	-1	unknown	-1	80	-1	0	pass	-	TMPRSS2	33660	yes
TRUE	245	1	188188529	21	41541724	1	188157660	21	42913651	22722	1.04913e+06	1086601	translocation_interchr	0	-1	unknown	-1	80	-1	0	pass	-	TMPRSS2	33660	yes
TRUE	246	1	188314786	15	98430140	1	188283917	15	98973369	29121	784662	735282	translocation_interchr	0	-1	heterozygous	1	81	-1	0	pass	-	FAM169B	7022	yes
TRUE	247	1	188314786	15	98430140	1	188283917	15	98973369	29122	784662	735282	translocation_interchr	0	-1	heterozygous	1	81	-1	0	pass	-	FAM169B	7022	yes
TRUE	248	1	188725243	12	68729113	1	188694374	12	69122893	31400	307150	136246	translocation_interchr	0	-1	unknown	-1	82	-1	0	fail	NUP107	DQ571824	6774	yes
TRUE	249	1	188725243	5	41819355	1	188694374	5	41819457	29181	175380	157027	translocation_interchr	0.02	-1	unknown	-1	82	-1	0	pass	OXCT1	DQ571824	6774	yes
TRUE	250	1	188966263	15	8.47845e+07	1	188935394	15	85327741	29181	415197	429570	translocation_interchr	0.01	-1	unknown	-1	83	-1	0	pass	ZNF592	ALPK3	32170.5	yes
TRUE	251	1	188725243	5	41819355	1	188694374	5	41819457	31721	1.21436e+06	1.23296e+06	translocation_interchr	0.1	-1	unknown	-1	82	-1	0	pass	OXCT1	DQ571824	6774	yes
TRUE	252	1	188966263	15	8.47845e+07	1	188935394	15	85327741	31721	974586	960022	translocation_interchr	0.01	-1	unknown	-1	83	-1	0	pass	ZNF592	ALPK3	32170.5	yes
TRUE	253	1	188725243	5	41819355	1	188694374	5	41819457	31722	1.21436e+06	1.23296e+06	translocation_interchr	0.24	-1	unknown	-1	82	-1	0	pass	OXCT1	DQ571824	6774	yes
TRUE	254	1	188966263	15	8.47845e+07	1	188935394	15	85327741	31722	974586	960022	translocation_interchr	0.02	-1	unknown	-1	83	-1	0	pass	ZNF592	ALPK3	32170.5	yes
TRUE	255	1	188725243	5	41819355	1	188694374	5	41819457	29182	175380	157027	translocation_interchr	0.48	-1	unknown	-1	82	-1	0	pass	OXCT1	DQ571824	6774	yes
TRUE	256	1	188725243	12	68729113	1	188694374	12	69122893	23121	4.4271e+06	4.59812e+06	translocation_interchr	0	-1	unknown	-1	82	-1	0	pass	NUP107	DQ571824	6774	yes
TRUE	257	1	189139998	20	605732	1	189109129	20	586376	23121	4.01734e+06	3.95059e+06	translocation_interchr	0	-1	unknown	-1	84	-1	0	pass	TCF15	DQ578393	9673	yes
TRUE	258	1	188725243	12	68729113	1	188694374	12	69122893	23122	2.85721e+06	3.02823e+06	translocation_interchr	0	-1	unknown	-1	82	-1	0	pass	NUP107	DQ571824	6774	yes
TRUE	259	1	189139998	20	605732	1	189109129	20	586376	23122	2.44745e+06	2.3807e+06	translocation_interchr	0	-1	unknown	-1	84	-1	0	pass	TCF15	DQ578393	9673	yes
TRUE	260	1	188733573	10	8.43236e+06	1	188702704	10	8474328	22721	2397059	2.49842e+06	translocation_interchr	0	-1	unknown	-1	82	-1	0	pass	-	DQ571824	15104	yes
TRUE	261	1	188733573	10	8.43236e+06	1	188702704	10	8474328	22722	2397059	2.49842e+06	translocation_interchr	0	-1	unknown	-1	82	-1	0	pass	-	DQ571824	15104	yes
TRUE	262	1	189094325	15	90709333	1	189063456	15	91252564	24061	2.07199e+06	1.69876e+06	translocation_interchr	0	-1	unknown	-1	84	-1	0	pass	-	BLM	7994	yes
TRUE	263	1	188842769	12	68932589	1	188811900	12	69326369	29701	307638	281043	translocation_interchr	0	-1	unknown	-1	83	-1	0	pass	CPM	JC172092	28500	yes
TRUE	264	1	188931694	15	92031871	1	188900825	15	92575101	31441	313144	453155	translocation_interchr	0	-1	unknown	-1	83	-1	0	pass	SLCO3A1	DQ596630	118094	yes
TRUE	265	1	188931694	15	92031871	1	188900825	15	92575101	31442	234812	374822	translocation_interchr	0	-1	unknown	-1	-1	-1	0	pass	SLCO3A1	DQ596630	118094	yes
TRUE	266	1	189094325	15	90709333	1	189063456	15	91252564	24062	2.31697e+06	1.94374e+06	translocation_interchr	0	-1	unknown	-1	84	-1	0	pass	-	BLM	7994	yes
FALSE	269	1	194477081	1	1.94497e+08	1	194446211	1	194466617	25591	439416	457003	deletion	1	-1	homozygous	1	86	2819	43.7	not_applicable	-	JC172208	7821.2	yes
FALSE	270	1	194477081	1	1.94497e+08	1	194446211	1	194466617	25592	439416	457003	deletion	1	-1	homozygous	1	86	2819	43.7	not_applicable	-	JC172208	7821.2	yes
FALSE	272	1	197523757	1	197540793	1	197492887	1	197509923	24702	1.44325e+06	1457612	deletion	1	-1	homozygous	1	87	2669	74.2	not_applicable	DENND1B	CRB1	45303	yes
FALSE	273	1	197523757	1	197540793	1	197492887	1	197509923	24701	1.48115e+06	1.49552e+06	deletion	1	-1	homozygous	1	87	2669	74.2	not_applicable	DENND1B	CRB1	45303	yes
FALSE	276	1	199464275	1	199481926	1	199433403	1	199451054	3421	475803	491686	deletion	0.99	-1	heterozygous	1	-1	1767	71.5	not_applicable	-	DQ587130	74162	yes
FALSE	278	1	202198434	1	202234946	1	202167562	1	202204074	3671	856210	896300	insertion	1	-1	homozygous	1	88	3579	93.4	not_applicable	LGR6	DQ588911	6399	yes
FALSE	279	1	202198434	1	202234946	1	202167562	1	202204074	3672	856210	896300	insertion	1	-1	homozygous	1	88	3579	93.4	not_applicable	LGR6	DQ588911	6399	yes
FALSE	281	1	206037899	1	206068882	1	206303467	1	206272448	2081	628540	665613	insertion	1	-1	homozygous	1	89	6090	41.1	not_applicable	C1orf186;AX747815;DQ586451	CTSE	13991	yes
FALSE	282	1	206037899	1	206068882	1	206303467	1	206272448	2082	599640	636713	insertion	1	-1	homozygous	1	89	6091	41.1	not_applicable	C1orf186;AX747815;DQ586451	CTSE	13991	yes
FALSE	283	1	206923491	1	206929767	1	207096836	1	207103112	9770	95359.3	102896	insertion	1	-1	homozygous	1	-1	1261	91.4	not_applicable	PIGR	FAIM3	1459	yes
FALSE	287	1	210627183	1	2.10657e+08	1	210800527	1	210830250	401	1.78453e+06	1.81831e+06	insertion	1	-1	homozygous	1	91	4059	80.1	not_applicable	HHAT	KCNH1	21409.2	yes
FALSE	288	1	210627183	1	2.10657e+08	1	210800527	1	210830250	402	1.78453e+06	1.81831e+06	insertion	1	-1	homozygous	1	91	4059	80.1	not_applicable	HHAT	KCNH1	21409.2	yes
FALSE	289	1	2.13535e+08	1	213544873	1	213708019	1	213718216	25242	421458	433028	insertion	1	-1	heterozygous	1	-1	1373	23.2	not_applicable	-	JB733771	3191	yes
FALSE	290	1	214237142	1	214240966	1	214410485	1	214414309	25242	1.12546e+06	1.12826e+06	deletion	0.99	-1	heterozygous	1	-1	1024	3.3	not_applicable	-	SMYD2	40256	yes
FALSE	292	1	214832236	1	214836014	1	215005579	1	215009357	2941	1.31478e+06	1.31982e+06	insertion	1	-1	homozygous	1	93	1269	75.5	not_applicable	-	DQ575296	34198	yes
FALSE	294	1	214832236	1	214836014	1	215005579	1	215009357	2942	1.31478e+06	1.31982e+06	insertion	1	-1	homozygous	1	93	1269	75.5	not_applicable	-	DQ575296	34198	yes
FALSE	295	1	217996859	1	218027325	1	218170201	1	218200667	61	4.09598e+06	4.1206e+06	deletion	1	-1	homozygous	1	94	5849	68.9	not_applicable	-	LINC00210	76056	yes
FALSE	296	1	219903459	1	2.19917e+08	1	220076801	1	220090043	61	2.20812e+06	2222961	insertion	1	-1	heterozygous	1	-1	1602	74.8	not_applicable	SLC30A10	EPRS	51899.5	yes
FALSE	297	1	217996859	1	218027325	1	218170201	1	218200667	62	4.09279e+06	4.1174e+06	deletion	1	-1	homozygous	1	94	5849	68.9	not_applicable	-	LINC00210	76056	yes
FALSE	299	1	223080972	1	223093597	1	223254314	1	223266939	9642	589668	606636	insertion	1	-1	homozygous	1	95	4342	82.1	not_applicable	-	TLR5	15809	yes
FALSE	300	1	223344625	1	223352250	1	223517967	1	223525592	9642	327744	337030	insertion	1	-1	homozygous	1	96	1661	30.5	not_applicable	SUSD4	C1orf65	41123	yes
FALSE	302	1	223080972	1	223093597	1	223254314	1	223266939	9641	589668	606636	insertion	1	-1	homozygous	1	95	4342	82.1	not_applicable	-	TLR5	15809	yes
FALSE	303	1	223344625	1	223352250	1	223517967	1	223525592	9641	327744	337030	insertion	1	-1	homozygous	1	96	1661	30.5	not_applicable	SUSD4	C1orf65	41123	yes
FALSE	310	1	228926888	1	228934612	1	229062635	1	229070359	13992	85395.5	95749.7	insertion	1	-1	heterozygous	1	-1	2630	0	not_applicable	-	AX748369	9682	yes
FALSE	314	1	229675139	1	229690822	1	229810886	1	229826569	1402	1.17017e+06	1.17754e+06	deletion	1	-1	heterozygous	1	-1	8317	27.2	not_applicable	-	URB2	14941	yes
FALSE	316	1	231786890	1	231804770	1	231922636	1	231940516	3961	744858	767010	insertion	1	-1	homozygous	1	102	4272	92.7	not_applicable	DISC1	DISC2	9856	yes
FALSE	318	1	231786890	1	231804770	1	231922636	1	231940516	3962	744858	767010	insertion	1	-1	homozygous	1	102	4272	92.7	not_applicable	DISC1	DISC2	9856	yes
FALSE	320	1	2.34202e+08	1	234208145	1	234338064	1	234343891	3111	1.23311e+06	1.24249e+06	insertion	1	-1	homozygous	1	103	3544	98	not_applicable	SLC35F3	AK054726	4461	yes
FALSE	321	1	2.34202e+08	1	234208145	1	234338064	1	234343891	3112	1.23219e+06	1.24249e+06	insertion	1	-1	homozygous	1	103	4471	97.4	not_applicable	SLC35F3	AK054726	4461	yes
FALSE	326	1	236095485	1	2.36105e+08	1	236258785	1	236267915	9231	226324	240891	insertion	1	-1	homozygous	1	106	5439	70.9	not_applicable	-	AX747246	29007	yes
FALSE	328	1	236385429	1	236394679	1	236548729	1	236557979	13021	506859	513927	deletion	1	-1	homozygous	1	107	2182	70.2	not_applicable	DQ580663;DQ588547;DQ601422;DQ586320;EDARADD	ERO1LB	103391	yes
FALSE	329	1	236705614	1	236722016	1	236868914	1	236885316	13021	171283	195424	insertion	1	-1	homozygous	1	108	7739	60.3	not_applicable	ACTN2	JC171932	60346	yes
FALSE	330	1	236385429	1	236394679	1	236548729	1	236557979	13022	506859	513927	deletion	1	-1	homozygous	1	107	2182	70.2	not_applicable	DQ580663;DQ588547;DQ601422;DQ586320;EDARADD	ERO1LB	103391	yes
FALSE	331	1	236707563	1	236722016	1	236870863	1	236885316	13022	171283	193537	insertion	1	-1	homozygous	1	108	7801	60.3	not_applicable	ACTN2	JC171932	62295	yes
FALSE	332	1	240178980	1	240188971	1	240342280	1	240352271	10461	173013	184931	insertion	1	-1	homozygous	1	109	1926	60.9	not_applicable	FMN2	JC172315	254	yes
FALSE	333	1	240178980	1	240188971	1	240342280	1	240352271	10462	173013	184931	insertion	1	-1	homozygous	1	109	1926	60.9	not_applicable	FMN2	JC172315	254	yes
FALSE	335	1	241663397	1	241682973	1	241826699	1	241846275	4121	490224	513091	insertion	1	-1	homozygous	1	111	3291	2	not_applicable	WDR64	OPN3	22999	yes
FALSE	337	1	241663397	1	241682973	1	241826699	1	241846275	4122	490224	513091	insertion	1	-1	homozygous	1	111	3291	2	not_applicable	WDR64	OPN3	22999	yes
FALSE	339	1	243843400	1	2.43846e+08	1	244006702	1	244009230	4130	329582	336192	insertion	1	-1	homozygous	1	-1	4083	94	not_applicable	-	AKT3	119	yes
FALSE	341	1	244790424	1	244804492	1	244953726	1	244967794	16331	141410	157660	insertion	1	-1	heterozygous	1	-1	2181	53	not_applicable	-	HV555621	8089	yes
FALSE	342	1	246514597	1	246522906	1	246677899	1	246686208	932	1.5114e+06	1517813	deletion	0.98	-1	heterozygous	1	-1	1892	25.8	not_applicable	RP11-690C23.2	SMYD3	7256	yes
FALSE	343	1	246815292	1	246821331	1	246978594	1	246984633	24381	889227	900352	insertion	1	-1	heterozygous	1	112	5086	52.3	not_applicable	-	AHCTF1	17767	yes
FALSE	344	1	247119847	1	247126254	1	247283149	1	247289556	24381	581034	590062	insertion	1	-1	heterozygous	1	-1	2621	29.8	not_applicable	-	C1orf229	7431	yes
FALSE	345	1	247355024	1	247363998	1	247518326	1	247527300	24381	340970	352776	insertion	1	-1	homozygous	1	113	2832	59.6	not_applicable	-	ZNF496	23282	yes
FALSE	346	1	246815292	1	246821331	1	246978594	1	246984633	24382	937726	951947	insertion	1	-1	heterozygous	2	112	8182	52.3	not_applicable	-	AHCTF1	17767	yes
FALSE	347	1	247126254	1	247132087	1	247289556	1	247295389	24382	624379	632076	insertion	1	-1	heterozygous	1	-1	1865	24.5	not_applicable	-	C1orf229	13838	yes
FALSE	348	1	247355024	1	247363998	1	247518326	1	247527300	24382	387922	401275	insertion	1	-1	homozygous	1	113	4379	45	not_applicable	-	ZNF496	23282	yes
FALSE	350	1	247885233	1	2.47896e+08	1	248048535	1	248059451	23111	161191	166128	deletion	1	-1	homozygous	1	114	5977	90.1	not_applicable	OR2W3	TRIM58	5098	yes
FALSE	351	1	248403063	1	248407772	1	248566364	1	248571073	23111	672664	685983	insertion	1	-1	homozygous	1	115	8609	71.5	not_applicable	OR2T1	OR2T6	14529	yes
FALSE	353	1	247885233	1	2.47896e+08	1	248048535	1	248059451	23112	94013.6	98951.4	deletion	1	-1	homozygous	1	114	5977	90.1	not_applicable	OR2W3	TRIM58	5098	yes
FALSE	354	1	248403063	1	248407772	1	248566364	1	248571073	23112	605487	618806	insertion	1	-1	homozygous	1	115	8609	71.5	not_applicable	OR2T1	OR2T6	14529	yes
FALSE	356	2	712090	2	742625	2	712090	2	742625	3861	461990	496908	insertion	1	-1	heterozygous	1	-1	4384	27.2	not_applicable	-	DQ571824	7099	yes
FALSE	357	2	907846	2	915682	2	903532	2	911368	3861	285284	295480	insertion	1	-1	heterozygous	1	-1	2362	16.6	not_applicable	-	AC113607.2	2396	yes
FALSE	359	2	1.59374e+06	2	1605446	2	1597514	2	1609218	7531	362918	375931	insertion	1	-1	homozygous	1	117	1308	66.2	not_applicable	-	PXDN	26441	yes
FALSE	362	2	1856575	2	1865776	2	1860347	2	1869548	7531	598920	609599	insertion	1	-1	homozygous	1	119	1477	98	not_applicable	MYT1L	PXDN	112057	yes
FALSE	363	2	1.59374e+06	2	1605446	2	1597514	2	1609218	7532	337090	350103	insertion	1	-1	homozygous	1	117	1309	66.2	not_applicable	-	PXDN	26441	yes
FALSE	365	2	1856575	2	1865776	2	1860347	2	1869548	7532	601612	612290	insertion	1	-1	homozygous	1	119	1478	98	not_applicable	MYT1L	PXDN	112057	yes
FALSE	366	2	3044270	2	3047845	2	3048042	2	3051617	3191	327154	334366	insertion	1	-1	homozygous	1	120	3637	92.7	not_applicable	LINC01250	DQ597682	56782	yes
FALSE	367	2	3179097	2	3181860	2	3182868	2	3185631	3191	466156	482326	insertion	1	-1	heterozygous	1	121	13407	75.5	not_applicable	-	TSSC1	7110	yes
FALSE	368	2	3312684	2	3319651	2	3316455	2	3323422	3191	614348	622720	insertion	1	-1	heterozygous	1	122	1404	65.6	not_applicable	TSSC1	DQ578550	46050	yes
FALSE	369	2	3720949	2	3.7271e+06	2	3768539	2	3774691	3191	1.02585e+06	1033164	insertion	1	-1	heterozygous	1	-1	1163	34.4	not_applicable	DCDC2C	DQ578393	12257.8	yes
FALSE	370	2	3873848	2	3886152	2	3921438	2	3933742	3191	1.1801e+06	1196440	insertion	1	-1	heterozygous	1	-1	4033	9.3	not_applicable	-	DCDC2C	26439	yes
FALSE	371	2	3044270	2	3047845	2	3048042	2	3051617	3192	327154	334366	insertion	1	-1	homozygous	1	120	3637	92.7	not_applicable	LINC01250	DQ597682	56782	yes
FALSE	373	2	3312684	2	3318179	2	3316455	2	3321950	3192	614348	620962	insertion	1	-1	heterozygous	2	122	1119	80.1	not_applicable	TSSC1	DQ578550	47522	yes
FALSE	375	2	4732796	2	4751638	2	4780386	2	4799228	1801	1.22999e+06	1.24267e+06	deletion	1	-1	homozygous	1	123	6160	82.8	not_applicable	-	DQ593458	36048	yes
FALSE	376	2	5.48805e+06	2	5495835	2	5628181	2	5635967	1801	482713	494482	insertion	1	-1	homozygous	1	124	3982	82.8	not_applicable	-	U02063	104176	yes
FALSE	377	2	4732796	2	4751638	2	4780386	2	4799228	1802	1.22999e+06	1.24267e+06	deletion	1	-1	homozygous	1	123	6160	82.8	not_applicable	-	DQ593458	36048	yes
FALSE	379	2	5.48805e+06	2	5495835	2	5628181	2	5635967	1802	482713	494482	insertion	1	-1	homozygous	1	124	3982	82.8	not_applicable	-	U02063	104176	yes
FALSE	380	2	9737288	2	9745990	2	9877417	2	9886119	27081	1585991	1.59665e+06	insertion	1	-1	homozygous	1	125	1952	19.9	not_applicable	-	TAF1B	97452	yes
FALSE	382	2	10396820	2	10400450	2	10536946	2	10540576	27081	925779	931593	insertion	1	-1	homozygous	1	126	2184	88.1	not_applicable	HPCAL1	ODC1	39921	yes
FALSE	383	2	10951515	2	1.09618e+07	2	11091641	2	11101936	27081	362023	373836	insertion	1	-1	homozygous	1	127	1519	96.7	not_applicable	-	KCNF1	37291	yes
FALSE	385	2	9737288	2	9745990	2	9877417	2	9886119	27082	1585991	1.59665e+06	insertion	1	-1	homozygous	1	125	1952	19.9	not_applicable	-	TAF1B	97452	yes
FALSE	386	2	10396820	2	10400450	2	10536946	2	10540576	27082	925779	931593	insertion	1	-1	homozygous	1	126	2184	88.1	not_applicable	HPCAL1	ODC1	39921	yes
FALSE	388	2	10951515	2	1.09618e+07	2	11091641	2	11101936	27082	362023	373836	insertion	1	-1	homozygous	1	127	1519	96.7	not_applicable	-	KCNF1	37291	yes
FALSE	393	2	16117192	2	16136783	2	16257314	2	16276905	13041	3899	21371.2	deletion	0.99	-1	homozygous	1	130	2119	0	not_applicable	-	SNORA40	62420	yes
FALSE	394	2	16117192	2	16136783	2	16257314	2	16276905	13042	3899	21371.2	deletion	0.99	-1	homozygous	1	130	2119	0	not_applicable	-	SNORA40	62420	yes
FALSE	395	2	17030390	2	17059560	2	17211657	2	17240827	10880	120715	129169	deletion	1	-1	homozygous	1	-1	20715	0.7	not_applicable	-	7SK	63281	yes
FALSE	399	2	2.29619e+07	2	22969321	2	23184756	2	23192193	30932	2.43429e+06	2.44778e+06	insertion	1	-1	heterozygous	1	-1	6055	55.6	not_applicable	-	DQ587130	40955.5	yes
FALSE	401	2	26336929	2	26337687	2	26559797	2	26560555	11120	737372	741683	insertion	1	-1	homozygous	1	-1	3554	93.4	not_applicable	-	EPT1	8399	yes
FALSE	402	2	26709316	2	26720726	2	26932184	2	26943594	19201	38061	51259.5	insertion	1	-1	heterozygous	1	-1	1788	49.7	not_applicable	KCNK3	AX746487	637	yes
FALSE	406	2	31820964	2	31827347	2	32046033	2	32052416	27941	387921	397590	insertion	1	-1	homozygous	1	133	3286	82.1	not_applicable	-	DQ596630	16743	yes
FALSE	407	2	31820964	2	31827347	2	32046033	2	32052416	27942	387921	397590	insertion	1	-1	homozygous	1	133	3286	82.1	not_applicable	-	DQ596630	16743	yes
FALSE	408	2	33612440	2	33625724	2	33837507	2	33850791	18701	338587	353598	insertion	1	-1	heterozygous	1	-1	1727	33.8	not_applicable	-	FAM98A	13146	yes
FALSE	410	2	35768573	2	35793926	2	35993639	2	36018992	27922	1.09756e+06	1.10028e+06	deletion	1	-1	homozygous	1	134	22633	43	not_applicable	-	U02063	71531	yes
FALSE	411	2	35768573	2	35793926	2	35993639	2	36018992	27921	1.06514e+06	1.06786e+06	deletion	1	-1	homozygous	1	134	22634	43	not_applicable	-	U02063	71531	yes
FALSE	412	2	38710023	2	38724878	2	38937165	2	38952020	1511	572811	589747	insertion	1	-1	homozygous	1	135	2081	92.7	not_applicable	GALM	SRSF7	18721	yes
FALSE	413	2	38710023	2	38724878	2	38937165	2	38952020	1512	538466	555402	insertion	1	-1	homozygous	1	135	2081	92.7	not_applicable	GALM	SRSF7	18721	yes
FALSE	414	2	41736751	2	41748952	2	41963891	2	41976092	31132	342563	352008	deletion	1	-1	heterozygous	1	-1	2755	64.9	not_applicable	DQ580663;DQ588547;DQ601422;DQ586320	Y_RNA	108319	yes
FALSE	416	2	47575632	2	4.75847e+07	2	47802771	2	47811857	271	976658	988356	insertion	1	-1	homozygous	1	136	2613	11.9	not_applicable	-	KCNK12	5302	yes
FALSE	417	2	47575632	2	4.75847e+07	2	47802771	2	47811857	272	976658	988356	insertion	1	-1	homozygous	1	136	2613	11.9	not_applicable	-	KCNK12	5302	yes
FALSE	418	2	52502088	2	52566426	2	52729226	2	52793564	11490	428726	457368	deletion	1	-1	homozygous	1	-1	35695	15.9	not_applicable	-	MIR4431	136096	yes
FALSE	420	2	54336837	2	54341679	2	54563974	2	54568816	18731	388050	390780	deletion	1	-1	homozygous	1	137	2112	64.9	not_applicable	C2orf73	DQ587130	9811	yes
FALSE	421	2	54336837	2	54341679	2	54563974	2	54568816	18732	247784	250514	deletion	1	-1	homozygous	1	137	2112	64.9	not_applicable	C2orf73	DQ587130	9811	yes
FALSE	422	2	54927879	2	54945970	2	55155016	2	55173107	6631	274487	295499	insertion	1	-1	heterozygous	1	-1	2921	92.7	not_applicable	EML6	RTN4	26221	yes
FALSE	424	2	5.64231e+07	2	56428183	2	56650229	2	56655318	30922	1.4633e+06	1.46528e+06	deletion	1	-1	heterozygous	1	138	3114	29.1	not_applicable	-	CCDC85A	36920.5	yes
FALSE	426	2	57224303	2	57234061	2	57451438	2	57461196	30922	656246	669563	insertion	1	-1	homozygous	1	139	3559	70.9	not_applicable	-	JC172329	118534	yes
FALSE	427	2	5.64231e+07	2	56440287	2	56650229	2	56667422	30921	1.52222e+06	1.53597e+06	deletion	1	-1	heterozygous	2	138	3448	29.1	not_applicable	-	CCDC85A	36920.5	yes
FALSE	428	2	57224303	2	57234061	2	57451438	2	57461196	30921	726935	740252	insertion	1	-1	homozygous	1	139	3559	70.9	not_applicable	-	JC172329	118534	yes
FALSE	429	2	57828679	2	57836524	2	58055814	2	58063659	30921	123367	136170	insertion	1	-1	heterozygous	1	-1	4957	70.9	not_applicable	-	VRK2	210118	yes
FALSE	433	2	64362302	2	64376434	2	64589436	2	64603568	27882	442714	459104	insertion	1	-1	homozygous	1	142	2257	79.5	not_applicable	-	AL355732	20655	yes
FALSE	435	2	64362302	2	64376434	2	64589436	2	64603568	27881	528609	544998	insertion	1	-1	homozygous	1	142	2257	79.5	not_applicable	-	AL355732	20655	yes
FALSE	436	2	65518777	2	65520324	2	65745911	2	65747458	10111	148961	153133	insertion	1	-1	homozygous	1	143	2625	33.1	not_applicable	AK131224	JC172329	28362	yes
FALSE	437	2	65598875	2	65609013	2	65826009	2	65836147	10111	58111.3	70469.5	insertion	1	-1	homozygous	1	144	2220	62.9	not_applicable	AK131224	JC172329	108460	yes
FALSE	438	2	65518777	2	65520324	2	65745911	2	65747458	10112	148961	153133	insertion	1	-1	homozygous	1	143	2625	33.1	not_applicable	AK131224	JC172329	28362	yes
FALSE	439	2	65598875	2	65609013	2	65826009	2	65836147	10112	58111.3	70469.5	insertion	1	-1	homozygous	1	144	2220	62.9	not_applicable	AK131224	JC172329	108460	yes
FALSE	445	2	71608087	2	71620693	2	71835217	2	71847823	18080	91771.9	106220	insertion	1	-1	homozygous	1	-1	1843	80.8	not_applicable	DYSF	ZNF638	173027	yes
FALSE	446	2	73779132	2	73783375	2	74006259	2	74010502	3811	526110	535360	insertion	1	-1	homozygous	1	146	5006	21.9	not_applicable	DUSP11	C2orf78	814	yes
FALSE	448	2	73779132	2	73783375	2	74006259	2	74010502	3812	526110	535360	insertion	1	-1	homozygous	1	146	5006	21.9	not_applicable	DUSP11	C2orf78	814	yes
FALSE	450	2	78848381	2	7.88647e+07	2	79075507	2	79091860	7961	433220	445088	deletion	1	-1	homozygous	1	148	4484	19.2	not_applicable	-	DQ589229	29003.5	yes
FALSE	451	2	78848381	2	7.88647e+07	2	79075507	2	79091860	7962	433220	445088	deletion	1	-1	homozygous	1	148	4484	19.2	not_applicable	-	DQ589229	29003.5	yes
FALSE	454	2	88729257	2	88761386	2	89028775	2	89060903	2091	442922	472120	deletion	1	-1	heterozygous	1	-1	2931	62.9	not_applicable	RPIA	ANKRD36BP2	4516	yes
FALSE	466	2	104816749	2	104827191	2	105433207	2	105443649	16030	224898	237660	insertion	1	-1	homozygous	1	-1	2320	90.7	not_applicable	LINC01158	POU3F3	28320	yes
FALSE	467	2	105757853	2	105783484	2	106374310	2	106399941	7342	66419.9	89045.8	deletion	1	-1	homozygous	1	153	3005	0	not_applicable	-	NCK2	68264	yes
FALSE	468	2	105757853	2	105783484	2	106374310	2	106399941	7341	66419.9	89045.8	deletion	1	-1	homozygous	1	153	3005	0	not_applicable	-	NCK2	68264	yes
FALSE	469	2	108690740	2	108706064	2	109307196	2	109322520	572	2.83828e+06	2.85202e+06	deletion	0.99	-1	heterozygous	1	-1	1587	23.8	not_applicable	-	LIMS1	3495	yes
FALSE	471	2	111246873	2	111256703	2	112004450	2	112014280	22501	178424	190257	insertion	1	-1	homozygous	1	154	2002	96	not_applicable	MIR4435-1HG	Mir_562	2935	yes
FALSE	472	2	111246873	2	111256703	2	112004450	2	112014280	22502	203336	215169	insertion	1	-1	homozygous	1	154	2002	96	not_applicable	MIR4435-1HG	Mir_562	2935	yes
FALSE	473	2	113386967	2	113399714	2	114144544	2	114157291	28192	218755	229189	deletion	1	-1	heterozygous	1	-1	2312	53	not_applicable	DQ588547;DQ601422;DQ571320	CBWD2	37977	yes
FALSE	474	2	116948835	2	116958725	2	117706411	2	117716301	16370	295142	308222	insertion	1	-1	homozygous	1	-1	3189	41.1	not_applicable	-	DQ589229	28136	yes
FALSE	479	2	1.26912e+08	2	126921956	2	127669087	2	127679532	2581	738021	745440	deletion	1	-1	homozygous	1	156	3028	60.3	not_applicable	-	BIN1	126067	yes
FALSE	481	2	1.26912e+08	2	126921956	2	127669087	2	127679532	2582	738021	745440	deletion	1	-1	homozygous	1	156	3028	60.3	not_applicable	-	BIN1	126067	yes
FALSE	482	2	1.28081e+08	2	128084777	2	128838193	2	128842351	10681	423437	428616	insertion	1	-1	homozygous	1	157	1019	84.8	not_applicable	-	UGGT1	6403	yes
FALSE	483	2	1.28081e+08	2	128084777	2	128838193	2	128842351	10682	423437	428616	insertion	1	-1	homozygous	1	157	1019	84.8	not_applicable	-	UGGT1	6403	yes
FALSE	486	2	128799426	2	128822811	2	129557000	2	129580385	13531	436478	465832	insertion	1	-1	homozygous	1	159	5969	18.5	not_applicable	-	L13714	31672	yes
FALSE	487	2	129172816	2	129174820	2	129930389	2	129932393	13531	81452.6	87099.9	insertion	1	-1	heterozygous	1	-1	3643	75.5	not_applicable	-	AK056598	67353	yes
FALSE	488	2	128799426	2	128822811	2	129557000	2	129580385	13532	432919	462273	insertion	1	-1	homozygous	1	159	5968	18.5	not_applicable	-	L13714	31672	yes
FALSE	489	2	129677356	2	129693135	2	130434929	2	130450708	26731	420429	437672	insertion	1	-1	homozygous	1	160	1465	92.1	not_applicable	-	DQ571320	140902	yes
FALSE	491	2	129677356	2	129693135	2	130434929	2	130450708	26732	403042	420285	insertion	1	-1	homozygous	1	160	1464	92.1	not_applicable	-	DQ571320	140902	yes
FALSE	501	2	143253166	2	143255125	2	144010735	2	144012694	1181	2.60503e+06	2.61315e+06	insertion	1	-1	heterozygous	1	-1	6162	15.2	not_applicable	ARHGAP15	DQ600853	163740	yes
FALSE	504	2	146262950	2	146272718	2	147020518	2	147030286	30572	393196	404356	insertion	1	-1	homozygous	1	165	1393	61.6	not_applicable	-	DQ587130	98770	yes
FALSE	505	2	146262950	2	146272718	2	147020518	2	147030286	30571	393196	404356	insertion	1	-1	homozygous	1	165	1393	61.6	not_applicable	-	DQ587130	98770	yes
FALSE	506	2	149883993	2	149901469	2	150740507	2	150757983	3480	76960.3	92540	deletion	0.99	-1	homozygous	1	-1	1896	0	not_applicable	-	AC144449.1	35760	yes
FALSE	507	2	154030770	2	154071307	2	154887283	2	154927820	30021	802241	839019	deletion	1	-1	homozygous	1	166	3758	14.6	not_applicable	GALNT13	DQ580215	163005	yes
FALSE	508	2	154030770	2	154071307	2	154887283	2	154927820	30022	802241	839019	deletion	1	-1	homozygous	1	166	3758	14.6	not_applicable	GALNT13	DQ580215	163005	yes
FALSE	509	2	157915568	2	1.5792e+08	2	158772080	2	158776779	13301	207901	216011	insertion	1	-1	homozygous	1	167	3411	96	not_applicable	-	U6	2684	yes
FALSE	510	2	157915568	2	1.5792e+08	2	158772080	2	158776779	13302	207901	216011	insertion	1	-1	homozygous	1	167	3411	96	not_applicable	-	U6	2684	yes
FALSE	511	2	158331723	2	158333875	2	159188235	2	159190387	10431	357179	365209	insertion	1	-1	heterozygous	1	-1	5878	31.1	not_applicable	CCDC148	DQ578550	21509	yes
FALSE	513	2	159292858	2	159304346	2	160149369	2	160160857	26111	956145	966164	deletion	0.99	-1	homozygous	1	168	1469	93.4	not_applicable	-	WDSUB1	6134	yes
FALSE	514	2	159292858	2	159304346	2	160149369	2	160160857	26112	956145	966164	deletion	0.99	-1	homozygous	1	168	1469	93.4	not_applicable	-	WDSUB1	6134	yes
FALSE	515	2	160308812	2	160313835	2	161165323	2	161170346	23161	745367	751499	insertion	1	-1	heterozygous	1	-1	1108	1.3	not_applicable	RBMS1	LOC100505984	36918	yes
FALSE	516	2	160585978	2	160598825	2	161442489	2	161455336	23161	460936	475330	insertion	1	-1	homozygous	1	169	1547	86.1	not_applicable	-	RBMS1	92172	yes
FALSE	517	2	160585978	2	160598825	2	161442489	2	161455336	23162	460936	475330	insertion	1	-1	homozygous	1	169	1547	86.1	not_applicable	-	RBMS1	92172	yes
FALSE	519	2	169766677	2	169795185	2	170623187	2	170651695	31201	982131	1.00805e+06	deletion	0.99	-1	homozygous	1	170	2589	82.1	not_applicable	DQ578550;DQ575296;DQ588545;DQ598327	SSB	3627	yes
FALSE	520	2	169766677	2	169795185	2	170623187	2	170651695	31202	958702	984622	deletion	0.99	-1	homozygous	1	170	2589	82.1	not_applicable	DQ578550;DQ575296;DQ588545;DQ598327	SSB	3627	yes
FALSE	521	2	171963943	2	171986327	2	172820465	2	172851241	10321	514092	544688	insertion	1	-1	homozygous	1	171	8212	82.1	not_applicable	HAT1	METAP1D	13570	yes
FALSE	522	2	171963943	2	171986327	2	172820465	2	172851241	10322	514092	544688	insertion	1	-1	homozygous	1	171	8212	82.1	not_applicable	HAT1	METAP1D	13570	yes
FALSE	524	2	175475238	2	175488719	2	176339966	2	176353447	27971	354360	361813	deletion	1	-1	homozygous	1	173	6027	52.3	not_applicable	-	JC172329	15759	yes
FALSE	526	2	175475238	2	175488719	2	176339966	2	176353447	27972	354360	361813	deletion	1	-1	homozygous	1	173	6027	52.3	not_applicable	-	JC172329	15759	yes
FALSE	527	2	176399231	2	176412123	2	177263959	2	177276851	3101	290100	296597	deletion	1	-1	homozygous	1	174	6396	66.2	not_applicable	-	JC172092	25817	yes
FALSE	528	2	176399231	2	176412123	2	177263959	2	177276851	3102	290100	296597	deletion	1	-1	homozygous	1	174	6396	66.2	not_applicable	-	JC172092	25817	yes
FALSE	529	2	1.79198e+08	2	179220326	2	180062668	2	180085053	27621	827806	833991	deletion	1	-1	homozygous	1	175	16201	25.8	not_applicable	SESTD1	DQ578550	98843	yes
FALSE	530	2	1.79198e+08	2	179220326	2	180062668	2	180085053	27622	827806	833991	deletion	1	-1	homozygous	1	175	16201	25.8	not_applicable	SESTD1	DQ578550	98843	yes
FALSE	536	2	193667306	2	193693510	2	194532030	2	194558234	4062	95646.3	124715	insertion	1	-1	heterozygous	1	-1	2865	51.7	not_applicable	-	DQ587130	53432	yes
FALSE	538	2	201275689	2	201284836	2	202140412	2	202149559	30541	574793	581152	deletion	1	-1	homozygous	1	176	2788	64.9	not_applicable	CASP8	ALS2CR12	3588	yes
FALSE	539	2	201275689	2	201284836	2	202140412	2	202149559	30542	555072	561431	deletion	1	-1	homozygous	1	176	2788	64.9	not_applicable	CASP8	ALS2CR12	3588	yes
FALSE	540	2	203014063	2	203042445	2	203878786	2	203907168	27541	768911	791967	deletion	1	-1	homozygous	1	177	5326	2.6	not_applicable	NBEAL1	CARF	27579	yes
FALSE	541	2	203014063	2	203042445	2	203878786	2	203907168	27542	768911	791967	deletion	1	-1	homozygous	1	177	5326	2.6	not_applicable	NBEAL1	CARF	27579	yes
FALSE	544	2	208077757	2	208128027	2	208942481	2	208992751	10001	7644.7	64075	insertion	1	-1	homozygous	1	178	6161	35.8	not_applicable	LOC100507443;CRYGD	CRYGC	110	yes
FALSE	545	2	208077757	2	208128027	2	208942481	2	208992751	10002	7644.7	64075	insertion	1	-1	homozygous	1	178	6161	35.8	not_applicable	LOC100507443;CRYGD	CRYGC	110	yes
FALSE	546	2	209072649	2	209099554	2	209937373	2	209964278	4951	213355	234282	deletion	1	-1	homozygous	1	179	5978	19.9	not_applicable	DQ597681	DQ587130	63335	yes
FALSE	547	2	209072649	2	209099554	2	209937373	2	209964278	4952	213355	234282	deletion	1	-1	homozygous	1	179	5978	19.9	not_applicable	DQ597681	DQ587130	63335	yes
FALSE	548	2	2.16223e+08	2	216235751	2	217088178	2	217100474	32810	141065	150780	deletion	0.99	-1	homozygous	1	180	2581	73.5	not_applicable	-	PKI55	3263.5	yes
FALSE	549	2	2.16223e+08	2	216235751	2	217088178	2	217100474	28511	141423	151127	deletion	1	-1	homozygous	1	180	2594	73.5	not_applicable	-	PKI55	3263.5	yes
FALSE	550	2	2.16223e+08	2	216235751	2	217088178	2	217100474	28512	141423	151127	deletion	1	-1	homozygous	1	180	2594	73.5	not_applicable	-	PKI55	3263.5	yes
FALSE	551	2	217804597	2	217806787	2	218669320	2	218671510	2461	458268	461644	insertion	1	-1	homozygous	1	181	1187	92.7	not_applicable	TNS1	DQ596939	17602	yes
FALSE	552	2	217804597	2	217806787	2	218669320	2	218671510	2462	458268	461644	insertion	1	-1	homozygous	1	181	1187	92.7	not_applicable	TNS1	DQ596939	17602	yes
FALSE	553	2	218834798	2	218847949	2	219699521	2	219712672	27161	173361	188447	insertion	1	-1	homozygous	1	182	1935	93.4	not_applicable	DQ580663;DQ588547;DQ601422;DQ591044	PRKAG3	3010	yes
FALSE	554	2	218834798	2	218847949	2	219699521	2	219712672	27162	173361	188447	insertion	1	-1	homozygous	1	182	1935	93.4	not_applicable	DQ580663;DQ588547;DQ601422;DQ591044	PRKAG3	3010	yes
FALSE	555	2	219180656	2	219203124	2	220045378	2	220067846	21972	158695	177388	deletion	0.99	-1	heterozygous	1	-1	3775	4	not_applicable	FAM134A	ZFAND2B	3660	yes
FALSE	556	2	222890475	2	222900954	2	223755193	2	223765672	9032	395564	403524	deletion	1	-1	homozygous	1	183	2519	88.7	not_applicable	ACSL3	DQ601422	74352	yes
FALSE	557	2	222890475	2	222900954	2	223755193	2	223765672	9031	415028	422988	deletion	1	-1	homozygous	1	183	2519	88.7	not_applicable	ACSL3	DQ601422	74352	yes
FALSE	561	2	226713789	2	226717037	2	227578505	2	227581753	26041	2.06928e+06	2.07361e+06	insertion	1	-1	homozygous	1	185	1080	97.4	not_applicable	-	IRS1	14280	yes
FALSE	562	2	226713789	2	226717037	2	227578505	2	227581753	26042	2.06928e+06	2.07361e+06	insertion	1	-1	homozygous	1	185	1080	97.4	not_applicable	-	IRS1	14280	yes
FALSE	564	2	2.34626e+08	2	234651931	2	235534920	2	235560575	4261	412901	435758	deletion	1	-1	homozygous	1	186	2798	78.8	not_applicable	DQ593458;DQ580985	DQ571320	62903.2	yes
FALSE	566	2	2.34626e+08	2	234651931	2	235534920	2	235560575	4262	412901	435758	deletion	1	-1	homozygous	1	186	2798	78.8	not_applicable	DQ593458;DQ580985	DQ571320	62903.2	yes
FALSE	571	2	238866205	2	238874413	2	239774846	2	239783054	22081	242442	253132	insertion	1	-1	heterozygous	1	-1	2481	82.8	not_applicable	TWIST2	FLJ43879	44889	yes
FALSE	572	2	239637240	2	239646781	2	240558934	2	240568475	3351	603051	615458	insertion	1	-1	homozygous	1	189	2865	53.6	not_applicable	-	BC132948	51147	yes
FALSE	574	2	239637240	2	239646781	2	240558934	2	240568475	3352	601630	614037	insertion	1	-1	homozygous	1	189	2865	53.6	not_applicable	-	BC132948	51147	yes
FALSE	577	2	241573469	2	241597645	2	242512884	2	242537060	9391	595465	623483	insertion	1	-1	homozygous	1	190	3842	84.1	not_applicable	BOK;THAP4	BOK-AS1	14327	yes
FALSE	579	2	241885992	2	241897354	2	242828143	2	242839505	9391	291046	306744	insertion	1	-1	homozygous	1	192	4336	84.8	not_applicable	LINC01237	RTP5	12663	yes
FALSE	581	2	241573469	2	241597645	2	242512884	2	242537060	9392	595687	623705	insertion	1	-1	homozygous	1	190	3843	84.1	not_applicable	BOK;THAP4	BOK-AS1	14327	yes
FALSE	586	3	184236	3	194107	3	225919	3	235790	21581	250927	255113	deletion	1	-1	heterozygous	1	-1	5684	31.8	not_applicable	-	CHL1	2489	yes
FALSE	588	3	5227862	3	5238851	3	5269547	3	5280536	23782	97711.2	111558	insertion	1	-1	heterozygous	1	-1	2858	13.2	not_applicable	-	DQ598327	4561	yes
FALSE	592	3	10363622	3	10376644	3	10405306	3	10418328	5941	39999.9	54093.6	insertion	1	-1	homozygous	1	195	1072	70.2	not_applicable	ATP2B2	MIR885	17845	yes
FALSE	593	3	10363622	3	10376644	3	10405306	3	10418328	5942	39999.9	54093.6	insertion	1	-1	homozygous	1	195	1072	70.2	not_applicable	ATP2B2	MIR885	17845	yes
FALSE	594	3	18784540	3	18793066	3	18826032	3	18834558	3342	1.66634e+06	1.67725e+06	insertion	1	-1	homozygous	1	196	2386	92.7	not_applicable	-	L13714	69906	yes
FALSE	596	3	18784540	3	18793066	3	18826032	3	18834558	3341	1.66634e+06	1.67725e+06	insertion	1	-1	homozygous	1	196	2386	92.7	not_applicable	-	L13714	69906	yes
FALSE	597	3	20287778	3	20305090	3	20329270	3	20346582	8590	713544	734964	insertion	1	-1	homozygous	1	-1	4108	70.2	not_applicable	-	L13714	75988	yes
FALSE	601	3	32668628	3	32675054	3	32710120	3	32716546	26191	1.29375e+06	1302756	insertion	1	-1	homozygous	1	198	2579	94.7	not_applicable	-	DQ601422	4583	yes
FALSE	603	3	32057584	3	32074884	3	32099076	3	32116376	26192	682979	694520	deletion	1	-1	heterozygous	1	-1	5759	53	not_applicable	-	GPD1L	31627	yes
FALSE	604	3	32668628	3	32675054	3	32710120	3	32716546	26192	1287914	1.29692e+06	insertion	1	-1	homozygous	1	198	2578	94.7	not_applicable	-	DQ601422	4583	yes
FALSE	606	3	37706852	3	37709589	3	37748343	3	37751080	4171	1.1617e+06	1.16723e+06	insertion	1	-1	homozygous	1	200	2797	96.7	not_applicable	ITGA9	BC040563	96254	yes
FALSE	607	3	37706852	3	37709589	3	37748343	3	37751080	4172	1.1617e+06	1.16723e+06	insertion	1	-1	homozygous	1	200	2797	96.7	not_applicable	ITGA9	BC040563	96254	yes
FALSE	608	3	38080665	3	38092686	3	38122156	3	38134177	1211	2.059e+06	2.07262e+06	insertion	1	-1	homozygous	1	201	1598	66.9	not_applicable	DLEC1;DQ578550;DQ588545	ACAA1	30024	yes
FALSE	609	3	39171103	3	39180779	3	39212594	3	39222270	1211	968746	979473	insertion	1	-1	homozygous	1	202	1050	46.4	not_applicable	-	XIRP1	2437	yes
FALSE	610	3	38080665	3	38092686	3	38122156	3	38134177	1212	2.059e+06	2.07262e+06	insertion	1	-1	homozygous	1	201	1598	66.9	not_applicable	DLEC1;DQ578550;DQ588545	ACAA1	30024	yes
FALSE	611	3	39171103	3	39180779	3	39212594	3	39222270	1212	968746	979473	insertion	1	-1	homozygous	1	202	1050	46.4	not_applicable	-	XIRP1	2437	yes
FALSE	614	3	4.27859e+07	3	42803415	3	42827437	3	42844907	23211	360590	376026	deletion	1	-1	homozygous	1	204	2035	88.7	not_applicable	HIGD1A;DQ580663;DQ588547;DQ586320	ACKR2	6058	yes
FALSE	616	3	4.27859e+07	3	42803415	3	42827437	3	42844907	23212	360590	376026	deletion	1	-1	homozygous	1	204	2035	88.7	not_applicable	HIGD1A;DQ580663;DQ588547;DQ586320	ACKR2	6058	yes
FALSE	620	3	47782114	3	47804224	3	47823604	3	47845714	18552	190570	220909	insertion	1	-1	homozygous	1	207	8229	91.4	not_applicable	DHX30	SMARCC1	200	yes
FALSE	621	3	47782114	3	47804224	3	47823604	3	47845714	18551	201982	232321	insertion	1	-1	homozygous	1	207	8230	91.4	not_applicable	DHX30	SMARCC1	200	yes
FALSE	624	3	55754481	3	5.57598e+07	3	55788509	3	55793870	15822	336037	347452	insertion	1	-1	homozygous	1	208	6054	40.4	not_applicable	ERC2	MIR3938	92650.5	yes
FALSE	625	3	55754481	3	5.57598e+07	3	55788509	3	55793870	15821	336037	347452	insertion	1	-1	homozygous	1	208	6054	40.4	not_applicable	ERC2	MIR3938	92650.5	yes
TRUE	626	3	59982106	3	59993247	3	59967832	3	59978973	2691	554019	566607	insertion	1	-1	homozygous	1	209	1447	4.6	not_applicable	FHIT	NPCDRG	8851	yes
TRUE	627	3	60375072	3	60591648	3	60360805	3	60577381	2691	946845	953050	deletion	0.97	-1	heterozygous	1	210	210371	0	not_applicable	FHIT;JC172241	JC172092	215908	yes
TRUE	628	3	59982106	3	59993247	3	59967832	3	59978973	2692	552866	565454	insertion	1	-1	homozygous	1	209	1447	4.6	not_applicable	FHIT	NPCDRG	8851	yes
TRUE	629	3	60427734	3	60541920	3	60413467	3	60527653	2692	997658	1.01023e+06	deletion	1	-1	heterozygous	2	210	101619	0	not_applicable	FHIT;JC172241	JC172092	268570	yes
FALSE	631	3	68684914	3	6.87015e+07	3	68734065	3	68750619	6151	638539	647179	deletion	1	-1	homozygous	1	211	7913	59.6	not_applicable	-	FAM19A4	30296.5	yes
FALSE	632	3	68684914	3	6.87015e+07	3	68734065	3	68750619	6152	638539	647179	deletion	1	-1	homozygous	1	211	7913	59.6	not_applicable	-	FAM19A4	30296.5	yes
FALSE	633	3	71428119	3	71436169	3	71477270	3	71485320	1671	631098	642186	insertion	1	-1	homozygous	1	212	3038	88.7	not_applicable	-	MIR1284	105801	yes
FALSE	634	3	71428119	3	71436169	3	71477270	3	71485320	1672	631098	642186	insertion	1	-1	homozygous	1	212	3038	88.7	not_applicable	-	MIR1284	105801	yes
FALSE	636	3	72336237	3	72341851	3	72385388	3	72391002	10271	36914.6	43711.3	insertion	1	-1	homozygous	1	213	1183	98	not_applicable	-	RYBP	32742	yes
FALSE	637	3	72336237	3	72341851	3	72385388	3	72391002	10272	164134	170930	insertion	1	-1	homozygous	1	213	1183	98	not_applicable	-	RYBP	32742	yes
FALSE	642	3	82557774	3	82568758	3	82606925	3	82617909	3041	1.55328e+06	1566981	insertion	1	-1	heterozygous	1	-1	2714	8.6	not_applicable	-	DQ588911	15576	yes
FALSE	643	3	82654870	3	82664727	3	82704021	3	82713878	3041	1.65264e+06	1.66399e+06	insertion	1	-1	heterozygous	1	-1	1490	20.5	not_applicable	-	DQ592816	51143	yes
FALSE	645	3	8.48962e+07	3	84905971	3	84945324	3	84955122	16502	602185	627436	insertion	1	-1	heterozygous	1	-1	15454	47	not_applicable	-	DQ588547	12570	yes
FALSE	646	3	85519673	3	8.55319e+07	3	85568823	3	85581039	26641	1.87371e+06	1.89121e+06	insertion	1	-1	heterozygous	1	-1	5290	11.9	not_applicable	CADM2	MIR5688	133882	yes
FALSE	647	3	86852945	3	86863831	3	86902095	3	86912981	26641	544986	557747	insertion	1	-1	homozygous	1	215	1875	80.1	not_applicable	-	VGLL3	74142	yes
FALSE	649	3	86852945	3	86863831	3	86902095	3	86912981	26642	608813	621574	insertion	1	-1	homozygous	1	215	1875	80.1	not_applicable	-	VGLL3	74142	yes
FALSE	650	3	88961918	3	88989505	3	89011068	3	89038655	4702	649244	680774	insertion	1	-1	homozygous	1	216	3944	51.7	not_applicable	-	EPHA3	118019	yes
FALSE	651	3	89445787	3	89468084	3	89494937	3	89517234	4702	179785	195531	deletion	1	-1	homozygous	1	217	6552	8.6	not_applicable	EPHA3	Mir_548	183889	yes
FALSE	652	3	88961918	3	88989505	3	89011068	3	89038655	4701	658122	689653	insertion	1	-1	homozygous	1	216	3944	51.7	not_applicable	-	EPHA3	118019	yes
FALSE	653	3	89445787	3	89468084	3	89494937	3	89517234	4701	188664	204409	deletion	1	-1	homozygous	1	217	6551	8.6	not_applicable	EPHA3	Mir_548	183889	yes
FALSE	654	3	95736217	3	95755532	3	95455061	3	95474376	17461	41469.7	59024.9	deletion	0.98	-1	heterozygous	1	-1	1760	13.2	not_applicable	DQ578550	MTHFD2P1	53025	yes
FALSE	655	3	99172352	3	99233330	3	98891196	3	98952174	4971	454266	506103	deletion	1	-1	heterozygous	1	-1	9142	9.3	not_applicable	-	DQ571824	35184	yes
FALSE	657	3	101635166	3	101641092	3	101354010	3	101359936	1222	1.60039e+06	1.60398e+06	deletion	1	-1	heterozygous	1	-1	2334	15.2	not_applicable	pol;AB167280	DQ575541	399	yes
FALSE	661	3	112163989	3	112164759	3	111882836	3	111883606	23301	396469	405764	insertion	1	-1	homozygous	1	219	8525	80.8	not_applicable	SLC9C1	GCSAM	30685	yes
FALSE	662	3	112163989	3	112164759	3	111882836	3	111883606	23302	396469	405764	insertion	1	-1	homozygous	1	219	8525	80.8	not_applicable	SLC9C1	GCSAM	30685	yes
FALSE	663	3	113017544	3	1.1303e+08	3	112736391	3	112748426	27481	454164	459064	deletion	0.99	-1	homozygous	1	220	7134	9.3	not_applicable	C3orf17;DQ571320	DQ571320	3631.5	yes
FALSE	664	3	113017544	3	1.1303e+08	3	112736391	3	112748426	27482	454164	459064	deletion	0.99	-1	homozygous	1	220	7134	9.3	not_applicable	C3orf17;DQ571320	DQ571320	3631.5	yes
TRUE	665	3	116841507	3	117016693	3	116560354	3	116735540	16790	253828	273493	deletion	1	-1	homozygous	1	-1	155521	0	not_applicable	MIR4447;BC040587	JC171968	10835	yes
FALSE	668	3	126366021	3	126389493	3	126084864	3	126108336	4981	609058	634220	insertion	1	-1	homozygous	1	221	1691	49.7	not_applicable	-	CCDC37-AS1	3539	yes
FALSE	669	3	126366021	3	126389493	3	126084864	3	126108336	4982	603072	628235	insertion	1	-1	homozygous	1	221	1691	49.7	not_applicable	-	CCDC37-AS1	3539	yes
FALSE	670	3	127282689	3	1.27298e+08	3	127001532	3	127016791	16591	85147.3	102474	insertion	1	-1	homozygous	1	222	2067	92.7	not_applicable	DQ578550	L13714	1921	yes
FALSE	672	3	127282689	3	1.27298e+08	3	127001532	3	127016791	16592	85147.3	102474	insertion	1	-1	homozygous	1	222	2067	92.7	not_applicable	DQ578550	L13714	1921	yes
FALSE	673	3	128650807	3	128663727	3	128369650	3	128382570	5160	260708	276052	insertion	1	-1	homozygous	1	-1	2424	93.4	not_applicable	RPN1;DQ596630	RAB7A	62409	yes
FALSE	677	3	136300987	3	136334720	3	136019829	3	136053562	2201	809666	838582	deletion	1	-1	heterozygous	1	-1	4817	42.4	not_applicable	PCCB	STAG1	2437	yes
FALSE	678	3	138108481	3	138138444	3	137827323	3	137857286	2251	1.20704e+06	1.23975e+06	insertion	0.99	-1	homozygous	1	223	2747	58.9	not_applicable	DZIP1L;A4GNT	DBR1	22544	yes
FALSE	679	3	137351268	3	137354940	3	137070110	3	137073782	2252	451768	454398	deletion	0.99	-1	heterozygous	1	-1	1042	40.4	not_applicable	-	DQ587130	24202	yes
FALSE	680	3	138108481	3	138138444	3	137827323	3	137857286	2252	1.20704e+06	1.23975e+06	insertion	0.99	-1	homozygous	1	223	2747	58.9	not_applicable	DZIP1L;A4GNT	DBR1	22544	yes
FALSE	682	3	140809976	3	140833226	3	140528818	3	140552068	2472	232231	252712	deletion	1	-1	heterozygous	1	-1	2769	33.8	not_applicable	-	SLC25A36	108594	yes
FALSE	684	3	145268203	3	145274535	3	144985990	3	144992322	30321	528959	544478	insertion	1	-1	homozygous	1	224	9187	53	not_applicable	-	DQ589596	121258	yes
FALSE	685	3	145268203	3	145274535	3	144985990	3	144992322	30322	528959	544478	insertion	1	-1	homozygous	1	224	9187	53	not_applicable	-	DQ589596	121258	yes
FALSE	686	3	145926762	3	145939553	3	145644549	3	145657340	30322	1.19408e+06	1.20267e+06	deletion	1	-1	heterozygous	1	-1	4205	20.5	not_applicable	-	PLOD2	129888	yes
FALSE	687	3	146658961	3	146675603	3	146376748	3	146393390	10370	262428	274128	deletion	1	-1	homozygous	1	-1	4941	64.9	not_applicable	-	PLSCR5	52746	yes
FALSE	688	3	148730282	3	1.48747e+08	3	148448069	3	148465273	81	1.15233e+06	1.17063e+06	insertion	1	-1	heterozygous	1	-1	1105	3.3	not_applicable	AGTR1	CPB1	80315.5	yes
FALSE	689	3	151430054	3	151443138	3	151147842	3	151160926	81	3.84926e+06	3.86839e+06	insertion	1	-1	homozygous	1	225	6050	63.6	not_applicable	MED12L;IGSF10	P2RY12	89200	yes
FALSE	690	3	151664469	3	151675585	3	151382257	3	151393373	81	4.08989e+06	4.11161e+06	insertion	1	-1	homozygous	1	226	10608	64.2	not_applicable	-	JB620909	34869	yes
FALSE	691	3	152587995	3	152598733	3	152305784	3	152316522	81	5.02195e+06	5.03114e+06	deletion	0.99	-1	homozygous	1	227	1547	85.4	not_applicable	-	JC172250	100592	yes
FALSE	692	3	152689271	3	152696147	3	152407060	3	152413936	81	5.12087e+06	5.13109e+06	insertion	1	-1	homozygous	1	228	3348	72.8	not_applicable	-	JC172250	3178	yes
FALSE	694	3	151430054	3	151443138	3	151147842	3	151160926	82	3845991	3.86512e+06	insertion	1	-1	homozygous	1	225	6049	63.6	not_applicable	MED12L;IGSF10	P2RY12	89200	yes
FALSE	695	3	151664469	3	151675585	3	151382257	3	151393373	82	4.08662e+06	4.10834e+06	insertion	1	-1	homozygous	1	226	10609	64.2	not_applicable	-	JB620909	34869	yes
FALSE	696	3	152587995	3	152598733	3	152305784	3	152316522	82	5.01868e+06	5.02788e+06	deletion	0.99	-1	homozygous	1	227	1547	85.4	not_applicable	-	JC172250	100592	yes
FALSE	697	3	152689271	3	152696147	3	152407060	3	152413936	82	5.1176e+06	5.12783e+06	insertion	1	-1	homozygous	1	228	3348	72.8	not_applicable	-	JC172250	3178	yes
FALSE	698	3	154172724	3	154184477	3	153890513	3	153902266	2261	1.02538e+06	1.04035e+06	insertion	1	-1	homozygous	1	229	3208	90.1	not_applicable	ARHGEF26	ARHGEF26-AS1	51515	yes
FALSE	699	3	154172724	3	154184477	3	153890513	3	153902266	2262	1.02538e+06	1.04035e+06	insertion	1	-1	homozygous	1	229	3208	90.1	not_applicable	ARHGEF26	ARHGEF26-AS1	51515	yes
FALSE	700	3	155284087	3	155316396	3	155001876	3	155034185	20430	69255.1	104988	insertion	1	-1	homozygous	1	-1	3423	29.1	not_applicable	RP11-451G4.2	BC037382	41079	yes
FALSE	701	3	162953892	3	163053464	3	162671680	3	162771252	26492	2.0142e+06	2.1028e+06	deletion	1	-1	homozygous	1	230	10973	19.9	not_applicable	BC073807	LINC01192	123779	yes
FALSE	704	3	162783675	3	1.62835e+08	3	162501463	3	162552984	26491	2238070	2.26983e+06	deletion	1	-1	heterozygous	1	-1	19757	19.9	not_applicable	BC073807	DQ596630	143020	yes
FALSE	707	3	174760171	3	174778912	3	174477961	3	174496702	26051	1.74042e+06	1.76105e+06	insertion	1	-1	homozygous	1	231	1897	67.5	not_applicable	Mir_652	NAALADL2	22426	yes
FALSE	708	3	175359869	3	1.75393e+08	3	175077658	3	175110366	26051	2.34083e+06	2.38022e+06	insertion	1	-1	homozygous	1	232	6680	17.2	not_applicable	NAALADL2;MIR4789	JC172208	22629.5	yes
FALSE	709	3	174760171	3	174778912	3	174477961	3	174496702	26052	1.74042e+06	1.76105e+06	insertion	1	-1	homozygous	1	231	1897	67.5	not_applicable	Mir_652	NAALADL2	22426	yes
FALSE	710	3	175359869	3	1.75393e+08	3	175077658	3	175110366	26052	2.34083e+06	2.38022e+06	insertion	1	-1	homozygous	1	232	6680	17.2	not_applicable	NAALADL2;MIR4789	JC172208	22629.5	yes
FALSE	713	3	186862278	3	1.86871e+08	3	186580067	3	186589181	22421	50317.4	55928.1	deletion	1	-1	heterozygous	1	233	3503	90.1	not_applicable	-	DQ580663	1921.8	yes
FALSE	714	3	186694310	3	186709292	3	186412099	3	186427081	22422	209529	212336	deletion	1	-1	heterozygous	1	-1	12175	0.7	not_applicable	-	KNG1	8017	yes
FALSE	715	3	186862278	3	186870493	3	186580067	3	186588282	22422	52125.4	55928.1	deletion	1	-1	heterozygous	2	233	4412	90.7	not_applicable	-	DQ580663	2821	yes
FALSE	716	3	190013138	3	190027779	3	189730927	3	189745568	8791	702579	714016	deletion	0.99	-1	heterozygous	1	-1	3205	6.6	not_applicable	LEPREL1	TP63	115860	yes
FALSE	717	3	191328917	3	191356370	3	191046706	3	191074159	25341	1.81168e+06	1.83221e+06	deletion	1	-1	heterozygous	1	-1	6924	13.9	not_applicable	UTS2B;CCDC50	JC172250	63170	yes
FALSE	718	3	193057131	3	1.93065e+08	3	192774920	3	192782556	25341	111910	113892	deletion	1	-1	heterozygous	1	-1	5653	7.9	not_applicable	-	DQ587130	11851	yes
FALSE	719	3	193149597	3	1.9317e+08	3	192867386	3	192887333	25341	17819.9	27215.8	deletion	1	-1	homozygous	1	234	10550	61.6	not_applicable	-	HRASLS	71584.5	yes
FALSE	720	3	1.93151e+08	3	1.9317e+08	3	192868432	3	192887333	25342	17819.9	26098.6	deletion	1	-1	homozygous	1	234	10622	61.6	not_applicable	-	HRASLS	71584.5	yes
FALSE	721	3	194274159	3	194277997	3	193991948	3	193995786	15461	119615	124580	insertion	1	-1	homozygous	1	235	1127	80.1	not_applicable	-	LINC00887	23203	yes
FALSE	722	3	194274159	3	194277997	3	193991948	3	193995786	15462	119615	124580	insertion	1	-1	homozygous	1	235	1127	80.1	not_applicable	-	LINC00887	23203	yes
FALSE	723	3	194676761	3	1.9468e+08	3	194397490	3	194400824	7312	320380	322381	deletion	0.98	-1	heterozygous	1	-1	1332	61.6	not_applicable	-	LSG1	4285	yes
FALSE	727	3	195764014	3	195789845	3	195490885	3	195516716	27362	2.49826e+06	2.53164e+06	insertion	1	-1	homozygous	2	237	7548	60.9	not_applicable	MUC4	MUC20	30462	yes
FALSE	729	3	195764014	3	195789845	3	195490885	3	195516716	27361	2.5705e+06	2.60387e+06	insertion	1	-1	heterozygous	2	237	7548	60.9	not_applicable	MUC4	MUC20	30462	yes
FALSE	730	3	197381564	3	197394910	3	197108435	3	197121781	27361	954594	973650	insertion	1	-1	homozygous	1	238	5711	74.8	not_applicable	-	DLG1-AS1	77815	yes
FALSE	731	3	198080498	3	198114629	3	197807369	3	197841500	27361	236569	267114	deletion	1	-1	heterozygous	1	-1	3585	41.7	not_applicable	ANKRD18DP	DQ586768	33341	yes
FALSE	732	3	197381564	3	197394910	3	197108435	3	197121781	27362	746577	765634	insertion	1	-1	homozygous	1	238	5711	74.8	not_applicable	-	DLG1-AS1	77815	yes
FALSE	733	4	148663	4	160285	4	142447	4	154075	23961	127298	142119	insertion	1	-1	homozygous	1	239	3199	7.9	not_applicable	ZNF718;ZNF718	ZNF876P	52315	yes
FALSE	734	4	545064	4	569896	4	538853	4	563685	23961	526357	557161	insertion	1	-1	homozygous	1	240	5973	85.4	not_applicable	DQ578550;DQ588911	PIGG	5144	yes
FALSE	738	4	1521938	4	1543707	4	1523665	4	1545434	23961	1.51625e+06	1.54051e+06	insertion	1	-1	homozygous	1	242	2487	0	not_applicable	-	AX748388	30354	yes
FALSE	739	4	148663	4	160285	4	142447	4	154075	23962	127298	142119	insertion	1	-1	homozygous	1	239	3199	7.9	not_applicable	ZNF718;ZNF718	ZNF876P	52315	yes
FALSE	740	4	545064	4	569896	4	538853	4	563685	23962	526357	557161	insertion	1	-1	homozygous	1	240	5973	85.4	not_applicable	DQ578550;DQ588911	PIGG	5144	yes
FALSE	741	4	741903	4	748611	4	735691	4	742399	23962	730399	734635	deletion	1	-1	heterozygous	1	-1	2472	53	not_applicable	PCGF3	LOC100129917	31538	yes
FALSE	743	4	1521938	4	1543707	4	1523665	4	1545434	23962	1.51413e+06	1.53838e+06	insertion	1	-1	homozygous	1	242	2488	0	not_applicable	-	AX748388	30354	yes
FALSE	750	4	5694702	4	5707039	4	5696429	4	5708766	15690	162128	177766	insertion	1	-1	homozygous	1	-1	3302	96.7	not_applicable	EVC2	EVC	4158	yes
FALSE	751	4	6.00016e+06	4	6009362	4	6001884	4	6011089	6142	54072.1	65109.5	insertion	1	-1	homozygous	1	244	1831	72.8	not_applicable	-	BX648674	10510.5	yes
FALSE	752	4	6.00016e+06	4	6009362	4	6001884	4	6011089	6141	744904	755941	insertion	1	-1	homozygous	1	244	1832	72.8	not_applicable	-	BX648674	10510.5	yes
FALSE	753	4	6.50615e+06	4	6515319	4	6507873	4	6517046	6141	236436	247430	insertion	1	-1	homozygous	1	245	1820	93.4	not_applicable	PPP2R2C	MAN2B2	59856	yes
FALSE	754	4	6.50615e+06	4	6515319	4	6507873	4	6517046	40162	236436	247430	insertion	1	-1	homozygous	1	245	1820	93.4	not_applicable	PPP2R2C	MAN2B2	59856	yes
FALSE	755	4	6894080	4	6919009	4	6895807	4	6920736	8962	465206	487399	deletion	1	-1	heterozygous	1	-1	2736	51	not_applicable	TBC1D14	KIAA0232	9909	yes
FALSE	756	4	7.99194e+06	4	7995886	4	7993664	4	7997613	10351	276284	279201	deletion	0.99	-1	heterozygous	1	-1	1032	40.4	not_applicable	ABLIM2	MIR95	9415	yes
FALSE	761	4	10207440	4	10234863	4	10209064	4	10236487	14672	111494	115719	deletion	1	-1	homozygous	1	-1	23198	55	not_applicable	-	DQ599898	63780	yes
FALSE	763	4	11711083	4	1.17239e+07	4	11712707	4	11725487	3211	667142	682277	insertion	1	-1	homozygous	1	249	2357	51	not_applicable	-	DQ580215	48842.5	yes
FALSE	764	4	11711083	4	1.17239e+07	4	11712707	4	11725487	3212	660986	676121	insertion	1	-1	homozygous	1	249	2357	51	not_applicable	-	DQ580215	48842.5	yes
TRUE	765	4	12711504	4	23824060	4	12713128	4	23825683	28991	1.23583e+06	1.22936e+06	translocation_intrachr	0	-1	heterozygous	1	250	-1	0	pass	PPARGC1A	JC172210	85595	yes
TRUE	766	4	12571048	15	92187886	4	12572672	15	92731116	28991	1.09434e+06	969661	translocation_interchr	0	-1	heterozygous	1	251	-1	0	pass	-	SLCO3A1	21980	yes
TRUE	767	4	12711504	4	23824060	4	12713128	4	23825683	28992	838542	832073	translocation_intrachr	0.01	-1	heterozygous	1	250	-1	0	pass	PPARGC1A	JC172210	85595	yes
TRUE	768	4	12571048	15	92187886	4	12572672	15	92731116	28992	697055	572375	translocation_interchr	0	-1	heterozygous	1	251	-1	0	pass	-	SLCO3A1	21980	yes
TRUE	769	4	12571048	15	92187886	4	12572672	15	92731116	30610	141412	265659	translocation_interchr	0	-1	heterozygous	1	251	-1	0	fail	-	SLCO3A1	21980	yes
TRUE	770	4	12711504	4	23824060	4	12713128	4	23825683	26480	91027.8	84385.7	translocation_intrachr	0.2	-1	heterozygous	1	250	-1	0	pass	PPARGC1A	JC172210	85595	yes
FALSE	771	4	13216468	4	13229129	4	13218092	4	13230753	2241	292976	307417	insertion	1	-1	heterozygous	1	-1	1779	13.2	not_applicable	-	JC172329	104227	yes
FALSE	772	4	14904063	4	14926887	4	14905687	4	14928511	26551	299546	324809	insertion	1	-1	homozygous	1	252	2439	60.3	not_applicable	-	MGC4836	15895	yes
FALSE	773	4	14926887	4	14965039	4	14928511	4	14966663	26551	324809	366051	insertion	0.99	-1	homozygous	1	253	3089	83.4	not_applicable	-	CPEB2-AS1	11861	yes
FALSE	775	4	14904063	4	14926887	4	14905687	4	14928511	26552	299546	324809	insertion	1	-1	homozygous	1	252	2439	60.3	not_applicable	-	MGC4836	15895	yes
FALSE	776	4	14926887	4	14965039	4	14928511	4	14966663	26552	324809	366051	insertion	0.99	-1	homozygous	1	253	3089	83.4	not_applicable	-	CPEB2-AS1	11861	yes
TRUE	781	4	23978465	12	68767540	4	23980088	12	69161320	28991	1.38419e+06	1.5513e+06	translocation_interchr	0	-1	unknown	-1	255	-1	0	pass	-	SLC35E3	1468	yes
TRUE	782	4	23978465	12	68767540	4	23980088	12	69161320	28992	986901	1.15402e+06	translocation_interchr	0	-1	unknown	-1	255	-1	0	pass	-	SLC35E3	1468	yes
TRUE	784	4	28168263	10	3225941	4	28169885	10	3268133	23281	495146	479534	translocation_interchr	0.01	-1	heterozygous	1	256	-1	0	pass	-	DQ593458	36406	yes
TRUE	785	4	28168263	10	3225941	4	28169885	10	3268133	23282	495146	479534	translocation_interchr	0	-1	heterozygous	1	256	-1	0	pass	-	DQ593458	36406	yes
TRUE	786	4	28600606	12	69382538	4	28602228	12	69776318	28901	554227	529090	translocation_interchr	0.02	-1	heterozygous	1	257	-1	0	pass	YEATS4	LYZ	28306	yes
TRUE	787	4	28600606	12	69382538	4	28602228	12	69776318	28902	453847	428710	translocation_interchr	0.01	-1	heterozygous	1	257	-1	0	pass	YEATS4	LYZ	28306	yes
FALSE	795	4	38260216	4	38264309	4	38261837	4	38265930	2452	1.37518e+06	1.37805e+06	deletion	0.98	-1	heterozygous	1	-1	1224	17.2	not_applicable	-	JC172208	38093	yes
FALSE	796	4	4.02827e+07	4	40300382	4	40284325	4	40302399	26162	163904	184103	insertion	1	-1	heterozygous	1	261	2521	95.4	not_applicable	-	JN120858	6803	yes
FALSE	797	4	40273881	4	40300382	4	40275501	4	40302399	26161	114290	149571	insertion	1	-1	heterozygous	2	261	8781	4.6	not_applicable	-	JN120858	6803	yes
FALSE	799	4	4.4414e+07	4	44420841	4	44416038	4	44422858	31101	372626	380576	insertion	1	-1	homozygous	1	262	1129	78.8	not_applicable	KCTD8	JC172136	139463	yes
FALSE	800	4	4.4414e+07	4	44420841	4	44416038	4	44422858	31102	46614.8	54564.7	insertion	1	-1	homozygous	1	262	1129	78.8	not_applicable	KCTD8	JC172136	139463	yes
FALSE	806	4	54155726	4	54168190	4	55021893	4	55034357	31091	4.43468e+06	4.44889e+06	insertion	1	-1	homozygous	1	265	1747	88.7	not_applicable	-	DQ570337	734	yes
FALSE	807	4	55725585	4	55748842	4	56591752	4	56615008	31091	2.85319e+06	2.88051e+06	insertion	1	-1	homozygous	1	266	4065	67.5	not_applicable	-	U6	49794	yes
FALSE	810	4	54155726	4	54168190	4	55021893	4	55034357	31092	4.43468e+06	4.44889e+06	insertion	1	-1	homozygous	1	265	1747	88.7	not_applicable	-	DQ570337	734	yes
FALSE	811	4	55725585	4	55748842	4	56591752	4	56615008	31092	2.85319e+06	2.88051e+06	insertion	1	-1	homozygous	1	266	4065	67.5	not_applicable	-	U6	49794	yes
FALSE	813	4	59070942	4	59105035	4	59936660	4	59970753	10341	118872	146640	deletion	1	-1	homozygous	1	268	6324	34.4	not_applicable	-	U02063	329269	yes
FALSE	815	4	59070942	4	59105035	4	59936660	4	59970753	10342	118872	146640	deletion	1	-1	homozygous	1	268	6324	34.4	not_applicable	-	U02063	329269	yes
FALSE	817	4	61066343	4	61086904	4	61932061	4	61952622	5131	1.50582e+06	1.5233e+06	deletion	1	-1	homozygous	1	270	3090	37.1	not_applicable	-	HV555656	8787	yes
FALSE	819	4	61066343	4	61086904	4	61932061	4	61952622	5132	1.50582e+06	1.5233e+06	deletion	1	-1	homozygous	1	270	3090	37.1	not_applicable	-	HV555656	8787	yes
FALSE	822	4	65541541	4	65553024	4	66407259	4	66418742	1072	3.17402e+06	3.18694e+06	insertion	1	-1	homozygous	1	272	1439	37.1	not_applicable	EPHA5	RP11-807H7.1	116937	yes
FALSE	823	4	6.59218e+07	4	65960016	4	66787535	4	66825734	1072	2.7646e+06	2.80701e+06	insertion	1	-1	heterozygous	1	273	4213	32.5	not_applicable	-	DQ578736	52612	yes
FALSE	824	4	65541541	4	65553024	4	66407259	4	66418742	1071	3.38898e+06	3.4019e+06	insertion	1	-1	homozygous	1	272	1439	37.1	not_applicable	EPHA5	RP11-807H7.1	116937	yes
FALSE	825	4	65932181	4	65960016	4	66797899	4	66825734	1071	2.97956e+06	3011663	insertion	1	-1	heterozygous	2	273	4268	32.5	not_applicable	-	DQ578736	52612	yes
FALSE	826	4	70089872	4	70114851	4	70955589	4	70980568	3721	1.11165e+06	1.14088e+06	insertion	1	-1	homozygous	1	274	4256	69.5	not_applicable	-	CSN1S2AP	4602	yes
FALSE	827	4	70089872	4	70114851	4	70955589	4	70980568	3722	1.11165e+06	1.14088e+06	insertion	1	-1	homozygous	1	274	4256	69.5	not_applicable	-	CSN1S2AP	4602	yes
FALSE	828	4	72962833	4	72988975	4	73828550	4	73854692	3011	1.72779e+06	1.75248e+06	deletion	0.99	-1	homozygous	1	275	1460	15.2	not_applicable	-	COX18	65724	yes
FALSE	829	4	72962833	4	72988975	4	73828550	4	73854692	3012	1.72779e+06	1.75248e+06	deletion	0.99	-1	homozygous	1	275	1460	15.2	not_applicable	-	COX18	65724	yes
FALSE	830	4	7.47121e+07	4	74724651	4	75637271	4	75649861	29972	378104	384615	deletion	1	-1	homozygous	1	276	6082	51	not_applicable	-	BTC	21587	yes
FALSE	831	4	7.47121e+07	4	74724651	4	75637271	4	75649861	29971	378104	384615	deletion	1	-1	homozygous	1	276	6082	51	not_applicable	-	BTC	21587	yes
FALSE	833	4	79958832	4	79979249	4	80879986	4	80900403	3081	500344	514667	deletion	1	-1	heterozygous	1	-1	6094	56.3	not_applicable	ANTXR2	PCAT4	95586	yes
FALSE	838	4	87556092	4	8.7566e+07	4	88477244	4	88487170	24372	1.16264e+06	1.17027e+06	deletion	1	-1	heterozygous	1	-1	2300	62.3	not_applicable	-	DQ596066	5468.5	yes
FALSE	843	4	91037181	4	91049565	4	91958332	4	91970716	27121	683397	701428	insertion	1	-1	homozygous	1	280	5647	55	not_applicable	CCSER1	5S_rRNA	215102	yes
FALSE	844	4	9.06657e+07	4	90696345	4	91586836	4	91617496	27122	228289	252994	deletion	1	-1	homozygous	1	279	5955	66.2	not_applicable	CCSER1	DQ571358	60824.5	yes
FALSE	845	4	91037181	4	91049565	4	91958332	4	91970716	27122	593018	611050	insertion	1	-1	homozygous	1	280	5647	55	not_applicable	CCSER1	5S_rRNA	215102	yes
FALSE	846	4	91620703	4	91627646	4	92541854	4	92548797	27122	1.18041e+06	1.18433e+06	deletion	1	-1	heterozygous	1	-1	3023	3.3	not_applicable	-	CCSER1	18485	yes
FALSE	847	4	92643849	4	92649851	4	93565000	4	93571002	28352	1.33108e+06	1.33902e+06	insertion	1	-1	homozygous	1	281	1940	57.6	not_applicable	GRID2	DQ587130	74581	yes
FALSE	849	4	92643849	4	92649851	4	93565000	4	93571002	28351	1.58843e+06	1.59637e+06	insertion	1	-1	homozygous	1	281	1940	57.6	not_applicable	GRID2	DQ587130	74581	yes
FALSE	861	4	107188323	4	107210908	4	108109480	4	108132065	6771	504468	523240	deletion	1	-1	homozygous	1	285	3813	67.5	not_applicable	-	HV555621	61105	yes
FALSE	862	4	107555975	4	107557910	4	108477132	4	108479067	6771	157185	160521	insertion	1	-1	homozygous	1	286	1402	90.7	not_applicable	-	PAPSS1	55756	yes
FALSE	863	4	107188323	4	107210908	4	108109480	4	108132065	6772	504468	523240	deletion	1	-1	homozygous	1	285	3813	67.5	not_applicable	-	HV555621	61105	yes
FALSE	864	4	107555975	4	107557910	4	108477132	4	108479067	6772	157185	160521	insertion	1	-1	homozygous	1	286	1402	90.7	not_applicable	-	PAPSS1	55756	yes
FALSE	865	4	111388621	4	111403478	4	112309777	4	112324634	12061	840935	848626	deletion	1	-1	heterozygous	1	-1	7166	2.6	not_applicable	-	DQ587130	85188	yes
FALSE	866	4	111702972	4	111711100	4	112624128	4	112632256	21101	130726	144916	insertion	1	-1	heterozygous	1	-1	6062	34.4	not_applicable	-	DQ593458	118661	yes
FALSE	871	4	132247811	4	132266555	4	133168966	4	133187710	26152	191894	208461	deletion	1	-1	heterozygous	1	-1	2176	36.4	not_applicable	-	DQ571824	132450	yes
FALSE	877	4	138547123	4	1.38561e+08	4	139468277	4	139482432	24491	32474.2	41732.5	deletion	1	-1	homozygous	1	290	4896	80.8	not_applicable	-	pol	64524.5	yes
FALSE	878	4	141307417	4	141316689	4	142228571	4	142237843	24491	2.78507e+06	2.7919e+06	deletion	1	-1	homozygous	1	291	2448	35.1	not_applicable	-	AK124399	4440	yes
FALSE	879	4	138547123	4	1.38561e+08	4	139468277	4	139482432	24492	32474.2	41732.5	deletion	1	-1	homozygous	1	290	4896	80.8	not_applicable	-	pol	64524.5	yes
FALSE	880	4	141307417	4	141316689	4	142228571	4	142237843	24492	2.78507e+06	2.7919e+06	deletion	1	-1	homozygous	1	291	2448	35.1	not_applicable	-	AK124399	4440	yes
FALSE	881	4	145511852	4	145520319	4	146433004	4	146441471	3221	435303	442129	deletion	0.98	-1	homozygous	1	292	1640	21.2	not_applicable	SMAD1	SMAD1-AS2	8873	yes
FALSE	882	4	145511852	4	145520319	4	146433004	4	146441471	3222	435303	442129	deletion	0.98	-1	homozygous	1	292	1640	21.2	not_applicable	SMAD1	SMAD1-AS2	8873	yes
FALSE	885	4	1.50248e+08	4	150256197	4	151169017	4	151177349	7702	582886	592891	insertion	1	-1	homozygous	1	293	1671	42.4	not_applicable	DCLK2	LRBA	8462	yes
FALSE	887	4	150258545	4	150264589	4	151179697	4	151185741	7701	573765	581006	insertion	1	-1	heterozygous	1	-1	1197	32.5	not_applicable	-	LRBA	70	yes
FALSE	888	4	151808543	4	151810284	4	152729695	4	152731436	2401	230874	238476	insertion	1	-1	heterozygous	1	-1	5860	2.6	not_applicable	-	DQ587130	26599	yes
FALSE	891	4	155953347	4	155964750	4	156874499	4	156885902	1361	459723	483818	insertion	1	-1	homozygous	1	294	12693	86.8	not_applicable	CTSO;DQ571825	DQ593458	18852	yes
FALSE	892	4	155953347	4	155964750	4	156874499	4	156885902	1362	459723	483818	insertion	1	-1	homozygous	1	294	12693	86.8	not_applicable	CTSO;DQ571825	DQ593458	18852	yes
FALSE	894	4	160957117	4	160978017	4	161878269	4	161899169	26370	747697	762698	deletion	1	-1	heterozygous	1	-1	5900	17.9	not_applicable	-	JC172329	19146	yes
FALSE	896	4	165077387	4	165086790	4	165998539	4	166007942	8462	717548	724460	deletion	1	-1	heterozygous	1	-1	2491	73.5	not_applicable	TMEM192	TRIM60	35644	yes
FALSE	897	4	166745543	4	166768673	4	167666694	4	167689824	30882	211396	228629	deletion	1	-1	homozygous	1	-1	5897	55	not_applicable	SPOCK3	DQ596939	73858	yes
FALSE	899	4	171449229	4	171459561	4	172370380	4	172380712	25832	878260	883610	deletion	1	-1	heterozygous	1	-1	4982	62.3	not_applicable	-	DQ594820	61198	yes
FALSE	900	4	172066600	4	172114307	4	172987751	4	173035458	25832	1.48782e+06	1.53096e+06	deletion	1	-1	heterozygous	1	-1	4565	41.1	not_applicable	GALNTL6	DQ572566	345759	yes
FALSE	901	4	173089321	4	173115285	4	174010472	4	174036436	26601	1.34678e+06	1.37593e+06	insertion	1	-1	heterozygous	1	-1	3186	18.5	not_applicable	-	BC040577	16648	yes
FALSE	902	4	174321479	4	174326965	4	175242630	4	175248116	26601	134689	142228	insertion	1	-1	homozygous	1	295	2054	59.6	not_applicable	-	CEP44	1149	yes
FALSE	903	4	174321479	4	174326965	4	175242630	4	175248116	26602	134689	142228	insertion	1	-1	homozygous	1	295	2054	59.6	not_applicable	-	CEP44	1149	yes
FALSE	906	4	179130284	4	1.79138e+08	4	180051438	4	180058768	31122	32779.2	42465.7	insertion	1	-1	homozygous	1	297	2357	31.8	not_applicable	-	L13714	6427	yes
FALSE	907	4	179130284	4	1.79138e+08	4	180051438	4	180058768	31121	32779.2	42465.7	insertion	1	-1	homozygous	1	297	2357	31.8	not_applicable	-	L13714	6427	yes
FALSE	909	4	181238751	4	181245113	4	182159904	4	182166266	1492	1.06508e+06	1.0735e+06	insertion	1	-1	heterozygous	2	298	2062	48.3	not_applicable	-	DQ571824	54052	yes
FALSE	911	4	185518715	4	185536932	4	186439869	4	186458086	12681	331449	347326	deletion	1	-1	homozygous	1	299	2339	61.6	not_applicable	PDLIM3	CCDC110	46957	yes
FALSE	912	4	185518715	4	185536932	4	186439869	4	186458086	12682	331449	347326	deletion	1	-1	homozygous	1	299	2339	61.6	not_applicable	PDLIM3	CCDC110	46957	yes
FALSE	913	4	186163085	4	186178997	4	187084239	4	187100151	24281	1.73094e+06	1.74248e+06	deletion	1	-1	heterozygous	1	-1	4379	35.1	not_applicable	FAM149A	FLJ38576	10035	yes
FALSE	914	4	186419907	4	186438617	4	187341061	4	187359771	24281	1.46329e+06	1.49008e+06	insertion	1	-1	heterozygous	1	300	8084	33.1	not_applicable	F11-AS1;F11-AS1	MTNR1A	95038	yes
FALSE	916	4	186956237	4	1.8698e+08	4	187877391	4	187901022	24281	931469	947316	deletion	1	-1	homozygous	1	301	7784	60.9	not_applicable	-	DQ587130	12456.5	yes
FALSE	918	4	186956237	4	1.8698e+08	4	187877391	4	187901022	24282	931469	947316	deletion	1	-1	homozygous	1	301	7784	60.9	not_applicable	-	DQ587130	12456.5	yes
FALSE	919	4	1.88433e+08	4	188455300	4	189354448	4	189376454	10581	207724	227024	deletion	1	-1	homozygous	1	302	2706	55.6	not_applicable	-	LINC01060	278	yes
FALSE	920	4	1.88433e+08	4	188455300	4	189354448	4	189376454	10582	207724	227024	deletion	1	-1	homozygous	1	302	2706	55.6	not_applicable	-	LINC01060	278	yes
FALSE	921	4	189125198	4	1.89146e+08	4	190046352	4	190067170	16211	83848.4	98346.8	deletion	1	-1	homozygous	1	303	6319	49.7	not_applicable	-	DQ580701	90835.5	yes
FALSE	925	4	189125198	4	1.89146e+08	4	190046352	4	190067170	16212	83848.4	98346.8	deletion	1	-1	homozygous	1	303	6319	49.7	not_applicable	-	DQ580701	90835.5	yes
FALSE	928	4	189305700	4	189314111	4	190226854	4	190235265	16212	329720	343715	insertion	1	-1	heterozygous	1	-1	5585	17.2	not_applicable	-	DQ580701	68812	yes
FALSE	936	5	539272	5	546114	5	539387	5	546230	31521	520633	528799	insertion	1	-1	homozygous	1	309	1324	40.4	not_applicable	-	MIR4456	3391	yes
FALSE	937	5	647125	5	662300	5	647240	5	662415	31521	401192	419915	insertion	1	-1	homozygous	1	310	3547	53.6	not_applicable	CEP72;TPPP	RP11-310P5.1	34916	yes
FALSE	941	5	343059	5	355657	5	343174	5	355772	31522	621166	635308	insertion	1	-1	homozygous	1	308	1543	18.5	not_applicable	AHRR	PDCD6	28086	yes
FALSE	942	5	539272	5	546114	5	539387	5	546230	31522	426642	434808	insertion	1	-1	homozygous	1	309	1324	40.4	not_applicable	-	MIR4456	3391	yes
FALSE	943	5	647125	5	662300	5	647240	5	662415	31522	307201	325924	insertion	1	-1	homozygous	1	310	3547	53.6	not_applicable	CEP72;TPPP	RP11-310P5.1	34916	yes
FALSE	945	5	777238	5	777238	5	777353	5	777353	31522	99618.5	190823	insertion	1	-1	heterozygous	1	-1	91205	1.3	not_applicable	-	ZDHHC11	18367	yes
FALSE	948	5	1068784	5	1074522	5	1068899	5	1074637	23731	191641	199492	insertion	1	-1	heterozygous	1	-1	2113	21.2	not_applicable	SLC12A7	MIR4635	5811	yes
FALSE	950	5	1288930	5	1296376	5	1289045	5	1296491	23731	414888	424543	insertion	1	-1	heterozygous	1	-1	2210	24.5	not_applicable	TERT	MIR4457	12934	yes
FALSE	952	5	1.40977e+06	5	1.42411e+06	5	1409886	5	1424222	23731	543110	561287	insertion	1	-1	homozygous	1	314	3841	47.7	not_applicable	SLC6A3	BC034612	29704.5	yes
FALSE	953	5	2143914	5	2147882	5	2144028	5	2147996	23731	1.28649e+06	1.29491e+06	insertion	1	-1	homozygous	1	315	4447	88.1	not_applicable	-	LOC100506858	155838	yes
FALSE	957	5	1.40977e+06	5	1.42411e+06	5	1409886	5	1424222	23732	540122	558299	insertion	1	-1	homozygous	1	314	3841	47.7	not_applicable	SLC6A3	BC034612	29704.5	yes
FALSE	960	5	2143914	5	2147882	5	2144028	5	2147996	23732	1.28031e+06	1.28873e+06	insertion	1	-1	homozygous	1	315	4447	88.1	not_applicable	-	LOC100506858	155838	yes
FALSE	961	5	2488271	5	2494775	5	2488385	5	2494889	6211	69003	76868.9	insertion	1	-1	heterozygous	1	-1	1361	28.5	not_applicable	-	LOC100506858	176071	yes
FALSE	966	5	3.65656e+06	5	3660972	5	3656675	5	3661086	9081	299754	305277	insertion	1	-1	homozygous	1	318	1112	53.6	not_applicable	-	IRX1	55158.5	yes
FALSE	967	5	3.65656e+06	5	3660972	5	3656675	5	3661086	9082	278035	283559	insertion	1	-1	homozygous	1	318	1112	53.6	not_applicable	-	IRX1	55158.5	yes
FALSE	968	5	4187159	5	4205428	5	4187272	5	4205541	19360	199545	219640	insertion	1	-1	homozygous	1	-1	1826	82.8	not_applicable	-	DQ587130	51952	yes
FALSE	969	5	5304142	5	5318626	5	5304255	5	5318739	7361	338294	356301	insertion	1	-1	homozygous	1	319	3522	39.1	not_applicable	ADAMTS16	DQ595317	36744	yes
FALSE	970	5	5304142	5	5318626	5	5304255	5	5318739	7362	338294	356301	insertion	1	-1	homozygous	1	319	3522	39.1	not_applicable	ADAMTS16	DQ595317	36744	yes
FALSE	972	5	6444496	5	6453412	5	6444609	5	6453525	341	2.80693e+06	2.81744e+06	insertion	1	-1	homozygous	1	321	1598	97.4	not_applicable	UBE2QL1	MED10	65971	yes
FALSE	973	5	6867232	5	6869595	5	6867345	5	6869708	341	2.3874e+06	2.39111e+06	insertion	1	-1	homozygous	1	322	1342	92.1	not_applicable	-	MIR4278	39312	yes
FALSE	974	5	7259613	5	7271758	5	7259726	5	7271871	341	1.9809e+06	1.99828e+06	insertion	1	-1	homozygous	1	323	5229	96	not_applicable	MIR4454	LOC442132	27616	yes
FALSE	975	5	8741942	5	8763260	5	8742054	5	8763372	341	489223	512694	insertion	0.99	-1	homozygous	1	324	2152	38.4	not_applicable	-	DQ586002	45885	yes
FALSE	977	5	6444496	5	6453412	5	6444609	5	6453525	342	2.80693e+06	2.81744e+06	insertion	1	-1	homozygous	1	321	1598	97.4	not_applicable	UBE2QL1	MED10	65971	yes
FALSE	978	5	6867232	5	6869595	5	6867345	5	6869708	342	2.3874e+06	2.39111e+06	insertion	1	-1	homozygous	1	322	1342	92.1	not_applicable	-	MIR4278	39312	yes
FALSE	979	5	7259613	5	7271758	5	7259726	5	7271871	342	1.9809e+06	1.99828e+06	insertion	1	-1	homozygous	1	323	5229	96	not_applicable	MIR4454	LOC442132	27616	yes
FALSE	980	5	8741942	5	8763260	5	8742054	5	8763372	342	489223	512694	insertion	0.99	-1	homozygous	1	324	2152	38.4	not_applicable	-	DQ586002	45885	yes
FALSE	981	5	9967483	5	9972346	5	9967595	5	9972458	30632	568833	576982	insertion	1	-1	heterozygous	1	-1	3286	31.1	not_applicable	-	LOC285692	63660	yes
FALSE	982	5	12810240	5	12825737	5	12810352	5	12825849	17502	316905	322924	deletion	1	-1	homozygous	1	325	9477	35.8	not_applicable	-	LINC01194	5058	yes
FALSE	983	5	12810240	5	12825737	5	12810352	5	12825849	17501	316905	322924	deletion	1	-1	homozygous	1	325	9477	35.8	not_applicable	-	LINC01194	5058	yes
FALSE	984	5	14343907	5	14349526	5	14344016	5	14349635	2342	1.18647e+06	1.1941e+06	insertion	1	-1	heterozygous	1	-1	2008	57	not_applicable	TRIO	AK098410	143548	yes
FALSE	985	5	14633847	5	1.46365e+07	5	14633956	5	14636596	2342	1.47907e+06	1.48296e+06	insertion	1	-1	heterozygous	1	-1	1248	45.7	not_applicable	-	FAM105A	17670	yes
FALSE	988	5	23902224	5	23908698	5	23902333	5	23908807	2311	965590	969767	deletion	1	-1	homozygous	1	326	2296	34.4	not_applicable	-	AX747383	42650	yes
FALSE	989	5	24369571	5	24382202	5	24369680	5	24382311	2311	496509	506271	deletion	1	-1	homozygous	1	327	2870	58.3	not_applicable	-	CDH10	104898	yes
FALSE	991	5	23902224	5	23908698	5	23902333	5	23908807	2312	1.86931e+06	1.87349e+06	deletion	1	-1	homozygous	1	326	2297	34.4	not_applicable	-	AX747383	42650	yes
FALSE	992	5	24369571	5	24382202	5	24369680	5	24382311	2312	1.40023e+06	1409989	deletion	1	-1	homozygous	1	327	2869	58.3	not_applicable	-	CDH10	104898	yes
FALSE	993	5	29065894	5	29071801	5	29066001	5	29071908	8322	251834	266610	insertion	1	-1	heterozygous	1	-1	8869	80.8	not_applicable	LOC101929645	DQ596939	55473	yes
FALSE	996	5	32969992	5	32975147	5	32970098	5	32975253	14702	26350.4	32565.7	insertion	1	-1	heterozygous	1	-1	1060	30.5	not_applicable	-	LOC340113	7526	yes
FALSE	997	5	33624275	5	33643275	5	33624380	5	33643380	8541	853205	877626	insertion	1	-1	homozygous	1	329	5421	74.2	not_applicable	ADAMTS12	DQ587130	70671	yes
FALSE	998	5	33796765	5	33804371	5	33796870	5	33804476	8541	685937	699721	insertion	1	-1	homozygous	1	330	6178	7.9	not_applicable	ADAMTS12	JC172208	22679	yes
FALSE	1000	5	33624275	5	33643275	5	33624380	5	33643380	8542	853205	877626	insertion	1	-1	homozygous	1	329	5421	74.2	not_applicable	ADAMTS12	DQ587130	70671	yes
FALSE	1001	5	33796765	5	33804371	5	33796870	5	33804476	8542	685937	699721	insertion	1	-1	homozygous	1	330	6178	7.9	not_applicable	ADAMTS12	JC172208	22679	yes
FALSE	1004	5	35699600	5	35723289	5	35699702	5	35723391	30341	1.31018e+06	1.33634e+06	insertion	1	-1	homozygous	1	332	2471	88.7	not_applicable	SPEF2	JC172208	88815	yes
FALSE	1005	5	35699600	5	35723289	5	35699702	5	35723391	30342	1.31018e+06	1.33634e+06	insertion	1	-1	homozygous	1	332	2471	88.7	not_applicable	SPEF2	JC172208	88815	yes
FALSE	1009	5	44995391	5	45016069	5	44995493	5	45016171	16642	245249	256196	deletion	1	-1	heterozygous	1	-1	9730	9.3	not_applicable	-	MRPS30	179876	yes
FALSE	1010	5	51925192	5	51934515	5	51221026	5	51230349	24831	1.98172e+06	1993462	insertion	1	-1	homozygous	1	334	2424	55	not_applicable	-	DQ580215	475334	yes
FALSE	1011	5	52100904	5	52113731	5	51396738	5	51409565	24831	1.80101e+06	1.81637e+06	insertion	1	-1	homozygous	1	335	2533	34.4	not_applicable	-	DQ580215	296118	yes
FALSE	1012	5	52512642	5	52534895	5	51808476	5	51830729	24831	1.37816e+06	1.40302e+06	insertion	1	-1	homozygous	1	336	2605	70.2	not_applicable	-	DQ580215	102769	yes
FALSE	1013	5	51925192	5	51934515	5	51221026	5	51230349	24832	1.98172e+06	1993462	insertion	1	-1	homozygous	1	334	2424	55	not_applicable	-	DQ580215	475334	yes
FALSE	1014	5	52100904	5	52113731	5	51396738	5	51409565	24832	1.80101e+06	1.81637e+06	insertion	1	-1	homozygous	1	335	2533	34.4	not_applicable	-	DQ580215	296118	yes
FALSE	1015	5	52512642	5	52534895	5	51808476	5	51830729	24832	1.37816e+06	1.40302e+06	insertion	1	-1	homozygous	1	336	2605	70.2	not_applicable	-	DQ580215	102769	yes
FALSE	1018	5	58033250	5	58045211	5	57329077	5	57341038	1871	1.2142e+06	1.21614e+06	deletion	1	-1	homozygous	1	337	10024	74.8	not_applicable	-	LOC101928569	62421	yes
FALSE	1019	5	58385709	5	5.83932e+07	5	57681536	5	57689059	1871	873512	875296	deletion	1	-1	homozygous	1	338	5739	82.1	not_applicable	-	PLK2	60751.5	yes
FALSE	1020	5	58033250	5	58045211	5	57329077	5	57341038	1872	1.2142e+06	1.21614e+06	deletion	1	-1	homozygous	1	337	10024	74.8	not_applicable	-	LOC101928569	62421	yes
FALSE	1021	5	58385709	5	5.83932e+07	5	57681536	5	57689059	1872	873512	875296	deletion	1	-1	homozygous	1	338	5739	82.1	not_applicable	-	PLK2	60751.5	yes
FALSE	1022	5	61280110	5	61310917	5	60575937	5	60606744	921	2005876	2.03968e+06	insertion	1	-1	homozygous	1	339	2993	94.7	not_applicable	-	ZSWIM6	21356	yes
FALSE	1023	5	61280110	5	61310917	5	60575937	5	60606744	922	2005876	2.03968e+06	insertion	1	-1	homozygous	1	339	2993	94.7	not_applicable	-	ZSWIM6	21356	yes
FALSE	1034	5	79126616	5	79132272	5	78422439	5	78428095	15010	170272	178459	insertion	1	-1	homozygous	1	341	2531	43.7	not_applicable	BHMT	BHMT2	36543	yes
FALSE	1037	5	82138404	5	82142421	5	81434223	5	81438240	29861	1.05816e+06	1.0634e+06	insertion	1	-1	homozygous	1	343	1218	88.7	not_applicable	ATG10;DQ580663;DQ588547;DQ601422;DQ586320	L13713	100858	yes
FALSE	1039	5	82138404	5	82142421	5	81434223	5	81438240	29862	1.05816e+06	1.0634e+06	insertion	1	-1	homozygous	1	343	1218	88.7	not_applicable	ATG10;DQ580663;DQ588547;DQ601422;DQ586320	L13713	100858	yes
FALSE	1040	5	84645803	5	84662464	5	83941621	5	83958282	27721	561750	571427	deletion	1	-1	homozygous	1	344	6985	88.1	not_applicable	-	EDIL3	260937	yes
FALSE	1041	5	84645803	5	84662464	5	83941621	5	83958282	27722	561750	571427	deletion	1	-1	homozygous	1	344	6985	88.1	not_applicable	-	EDIL3	260937	yes
FALSE	1042	5	86817363	5	86824596	5	86113180	5	86120413	5591	745993	750861	deletion	1	-1	homozygous	1	345	2364	16.6	not_applicable	JC172329	JC172250	6455	yes
FALSE	1043	5	86817363	5	86824596	5	86113180	5	86120413	5592	745993	750861	deletion	1	-1	homozygous	1	345	2364	16.6	not_applicable	JC172329	JC172250	6455	yes
FALSE	1044	5	88078055	5	88099934	5	87373872	5	87395751	27231	481524	500460	deletion	1	-1	homozygous	1	346	2943	18.5	not_applicable	-	DQ587130	2485	yes
FALSE	1045	5	88078055	5	88099934	5	87373872	5	87395751	27232	481524	500460	deletion	1	-1	homozygous	1	346	2943	18.5	not_applicable	-	DQ587130	2485	yes
FALSE	1046	5	9.01488e+07	5	90160892	5	89444615	5	89456709	26001	723478	741582	insertion	1	-1	homozygous	1	347	6010	90.1	not_applicable	-	MIR3660	132078	yes
FALSE	1047	5	9.01488e+07	5	90160892	5	89444615	5	89456709	26002	723478	741582	insertion	1	-1	homozygous	1	347	6010	90.1	not_applicable	-	MIR3660	132078	yes
FALSE	1050	5	98229954	5	98233406	5	97565658	5	97569110	26561	3.46124e+06	3466951	insertion	1	-1	homozygous	1	349	2256	81.5	not_applicable	-	HM358988	105568	yes
FALSE	1051	5	99000498	5	99015359	5	98336202	5	98351063	26561	2683539	2.69605e+06	deletion	1	-1	homozygous	1	350	2346	77.5	not_applicable	-	DQ594187	1495	yes
FALSE	1053	5	98229954	5	98233406	5	97565658	5	97569110	26562	3463449	3.46916e+06	insertion	1	-1	homozygous	1	349	2255	81.5	not_applicable	-	HM358988	105568	yes
FALSE	1055	5	99000498	5	99015359	5	98336202	5	98351063	26562	2.68574e+06	2.69826e+06	deletion	1	-1	homozygous	1	350	2345	77.5	not_applicable	-	DQ594187	1495	yes
FALSE	1057	5	9.99801e+07	5	99982090	5	99315850	5	99317794	26562	1.72434e+06	1.72864e+06	insertion	1	-1	heterozygous	1	-1	2363	27.8	not_applicable	-	JB137812	64336	yes
FALSE	1058	5	104514766	5	104527260	5	103850467	5	103862961	27980	1504735	1.5113e+06	deletion	1	-1	homozygous	1	-1	5930	60.9	not_applicable	-	DQ593458	35138	yes
FALSE	1059	5	106987599	5	106998351	5	106323300	5	106334052	11511	592973	602046	deletion	0.98	-1	homozygous	1	352	1679	39.7	not_applicable	LOC102467213	EFNA5	378538	yes
FALSE	1060	5	106987599	5	106998351	5	106323300	5	106334052	11512	670694	679767	deletion	0.98	-1	homozygous	1	352	1679	39.7	not_applicable	LOC102467213	EFNA5	378538	yes
FALSE	1061	5	110142195	5	110179322	5	109477896	5	109515023	3371	1208601	1.25175e+06	insertion	1	-1	heterozygous	1	-1	6018	51	not_applicable	-	TMEM232	240174	yes
FALSE	1063	5	110136755	5	110142195	5	109472456	5	109477896	3372	1244862	1.2571e+06	insertion	1	-1	heterozygous	1	353	6802	49.7	not_applicable	-	LOC100289673	251257	yes
FALSE	1064	5	110136755	5	110142195	5	109472456	5	109477896	32680	59510.7	71687.8	insertion	1	-1	heterozygous	1	353	6737	49.7	not_applicable	-	LOC100289673	251257	yes
FALSE	1065	5	115420277	5	115435496	5	114755974	5	114771193	23701	2.26549e+06	2.27924e+06	deletion	0.99	-1	homozygous	1	354	1470	62.3	not_applicable	-	FEM1C	85415	yes
FALSE	1066	5	115420277	5	115435496	5	114755974	5	114771193	23702	2.26549e+06	2.27924e+06	deletion	0.99	-1	homozygous	1	354	1470	62.3	not_applicable	-	FEM1C	85415	yes
FALSE	1067	5	119081029	5	119140682	5	118416724	5	118476377	6651	286074	353299	insertion	1	-1	homozygous	1	355	7573	38.4	not_applicable	DMXL1;DQ578550	MIR5706	13955	yes
FALSE	1068	5	119088598	5	119140682	5	118424293	5	118476377	6652	293572	353299	insertion	1	-1	homozygous	1	355	7644	38.4	not_applicable	DMXL1;DQ578550	MIR5706	13955	yes
FALSE	1069	5	122233257	5	1.22251e+08	5	121568952	5	121586593	292	2.72322e+06	2.7359e+06	deletion	1	-1	heterozygous	1	-1	4959	32.5	not_applicable	-	LOC100505841	50595	yes
FALSE	1070	5	126721892	5	126730909	5	126057584	5	126066601	27561	1.73843e+06	1.75024e+06	insertion	1	-1	homozygous	1	356	2799	35.8	not_applicable	-	U6	24407	yes
FALSE	1071	5	126721892	5	126730909	5	126057584	5	126066601	27562	1.73843e+06	1.75024e+06	insertion	1	-1	homozygous	1	356	2799	35.8	not_applicable	-	U6	24407	yes
FALSE	1072	5	133559869	5	133594501	5	132895560	5	132930192	17432	42579.5	71058.5	deletion	0.99	-1	heterozygous	1	-1	6153	8.6	not_applicable	FSTL4	MIR1289-2	132164	yes
FALSE	1073	5	134432651	5	134443718	5	133768342	5	133779409	4101	795729	808483	insertion	1	-1	homozygous	1	357	1687	66.2	not_applicable	LOC102546229	CDKN2AIPNL	20745	yes
FALSE	1074	5	134432651	5	134443718	5	133768342	5	133779409	4102	795729	808483	insertion	1	-1	homozygous	1	357	1687	66.2	not_applicable	LOC102546229	CDKN2AIPNL	20745	yes
FALSE	1075	5	137517288	5	137526104	5	136852977	5	136861793	6340	315354	322384	deletion	0.98	-1	homozygous	1	-1	1785	96	not_applicable	-	DQ575296	12421	yes
FALSE	1076	5	141983173	5	142009928	5	141362738	5	141389493	1741	1.1845e+06	1.21533e+06	insertion	1	-1	homozygous	1	358	4072	93.4	not_applicable	RNF14;GNPDA1	PCDH12	24112	yes
FALSE	1077	5	141983173	5	142009928	5	141362738	5	141389493	1742	1.1845e+06	1.21533e+06	insertion	1	-1	homozygous	1	358	4072	93.4	not_applicable	RNF14;GNPDA1	PCDH12	24112	yes
FALSE	1078	5	144947526	5	144957177	5	144327089	5	144336740	3701	1.06831e+06	1.07997e+06	insertion	1	-1	heterozygous	1	-1	2006	20.5	not_applicable	-	DQ587130	102813	yes
FALSE	1083	5	149642947	5	149658919	5	149022510	5	149038482	4671	376411	393522	insertion	1	-1	homozygous	1	361	1138	86.8	not_applicable	-	ARHGEF37	7984	yes
FALSE	1084	5	149642947	5	149658919	5	149022510	5	149038482	4672	376411	393522	insertion	1	-1	homozygous	1	361	1138	86.8	not_applicable	-	ARHGEF37	7984	yes
FALSE	1085	5	151147093	5	151169714	5	150526654	5	150549275	12932	93604.9	118869	insertion	1	-1	heterozygous	1	-1	2643	6.6	not_applicable	ANXA6	CCDC69	11338	yes
FALSE	1086	5	152074118	5	152091283	5	151453679	5	151470844	331	2.53859e+06	2.54991e+06	deletion	1	-1	homozygous	1	362	5847	80.8	not_applicable	CTB-12O2.1	GLRA1	149283	yes
FALSE	1087	5	153935776	5	153954501	5	153315336	5	153334061	331	676033	698975	insertion	1	-1	homozygous	1	363	4218	69.5	not_applicable	-	FAM114A2	37205	yes
FALSE	1088	5	152074118	5	152091283	5	151453679	5	151470844	332	2.53859e+06	2.54991e+06	deletion	1	-1	homozygous	1	362	5847	80.8	not_applicable	CTB-12O2.1	GLRA1	149283	yes
FALSE	1089	5	153935776	5	153954501	5	153315336	5	153334061	332	676033	698975	insertion	1	-1	homozygous	1	363	4218	69.5	not_applicable	-	FAM114A2	37205	yes
FALSE	1090	5	156042882	5	156066423	5	155469892	5	155493433	2021	1.49535e+06	1504802	deletion	1	-1	homozygous	1	364	14091	9.3	not_applicable	-	JC172329	141195	yes
FALSE	1091	5	156042882	5	156066423	5	155469892	5	155493433	2022	1.49535e+06	1504802	deletion	1	-1	homozygous	1	364	14091	9.3	not_applicable	-	JC172329	141195	yes
FALSE	1092	5	157774546	5	157805808	5	157201554	5	157232816	12691	136181	169835	insertion	1	-1	homozygous	1	365	2393	94	not_applicable	JC172208;CLINT1	U6	3290	yes
FALSE	1093	5	157774546	5	157805808	5	157201554	5	157232816	12692	136181	169835	insertion	1	-1	homozygous	1	365	2393	94	not_applicable	JC172208;CLINT1	U6	3290	yes
FALSE	1094	5	158437986	5	158442903	5	157864994	5	157869911	3791	667988	677738	insertion	1	-1	homozygous	1	366	4834	23.2	not_applicable	-	LOC101927697	28214	yes
FALSE	1095	5	158437986	5	158442903	5	157864994	5	157869911	3792	667988	677738	insertion	1	-1	homozygous	1	366	4834	23.2	not_applicable	-	LOC101927697	28214	yes
FALSE	1101	5	173532088	5	173549407	5	172959091	5	172976410	18841	12730.7	28174.4	deletion	0.99	-1	heterozygous	1	-1	1875	11.3	not_applicable	-	LOC285593	30227	yes
FALSE	1102	5	1.74725e+08	5	174745430	5	174152101	5	174172433	12881	442143	466219	insertion	1	-1	heterozygous	1	-1	3742	47.7	not_applicable	MSX2	MIR4634	6304	yes
FALSE	1108	5	178583020	5	178594900	5	178010021	5	178021901	7101	122514	137180	insertion	1	-1	heterozygous	1	371	2787	48.3	not_applicable	COL23A1	CLK4	7764	yes
FALSE	1109	5	178583020	5	178594900	5	178010021	5	178021901	7102	122514	145092	insertion	1	-1	heterozygous	2	371	10699	35.1	not_applicable	COL23A1	CLK4	7764	yes
FALSE	1110	5	179586131	5	179598738	5	179013132	5	179025739	22321	200047	214452	insertion	1	-1	homozygous	1	372	1797	91.4	not_applicable	RUFY1;L13714	L13714	13501	yes
FALSE	1111	5	179505266	5	179515419	5	178932267	5	178942420	22322	285236	293444	deletion	0.98	-1	heterozygous	1	-1	1945	1.3	not_applicable	-	AX747985	7080	yes
FALSE	1112	5	179586131	5	179598738	5	179013132	5	179025739	22322	200047	214452	insertion	1	-1	homozygous	1	372	1797	91.4	not_applicable	RUFY1;L13714	L13714	13501	yes
FALSE	1113	5	180126575	5	180135381	5	179553575	5	179562381	1851	1.29749e+06	1.30766e+06	insertion	1	-1	heterozygous	1	373	1363	96	not_applicable	RASGEF1C	RNF130	54458	yes
FALSE	1114	5	180214841	5	180219839	5	179641841	5	179646839	1851	1213302	1.21722e+06	deletion	0.99	-1	homozygous	1	374	1078	2.6	not_applicable	-	RASGEF1C	5712	yes
FALSE	1115	5	180945910	5	1.8101e+08	5	180372910	5	180437084	1851	473452	482206	deletion	1	-1	homozygous	1	375	55420	31.8	not_applicable	BTNL8;BTNL3	JC172208	25749	yes
FALSE	1116	5	181032276	5	181049054	5	180459276	5	180476054	1851	429951	451419	insertion	1	-1	heterozygous	1	-1	4689	79.5	not_applicable	BTNL9;MIR8089	BTNL3	25550	yes
FALSE	1117	5	180134098	5	180135381	5	179561098	5	179562381	1852	1.29453e+06	1.29689e+06	insertion	1	-1	heterozygous	2	373	1080	94	not_applicable	RASGEF1C	RNF130	61981	yes
FALSE	1118	5	180214841	5	180219839	5	179641841	5	179646839	1852	1.21034e+06	1.21426e+06	deletion	0.99	-1	homozygous	1	374	1078	2.6	not_applicable	-	RASGEF1C	5712	yes
FALSE	1119	5	180945910	5	1.8101e+08	5	180372910	5	180437084	1852	469726	478479	deletion	1	-1	homozygous	1	375	55419	31.8	not_applicable	BTNL8;BTNL3	JC172208	25749	yes
FALSE	1120	6	364330	6	383892	6	364330	6	383892	29030	307104	330312	insertion	1	-1	heterozygous	1	-1	3647	52.3	not_applicable	-	IRF4	7847	yes
FALSE	1122	6	664120	6	669617	6	664120	6	669617	15761	271137	275045	deletion	0.98	-1	homozygous	1	376	1589	53.6	not_applicable	EXOC2	HUS1B	7157	yes
FALSE	1123	6	664120	6	669617	6	664120	6	669617	15762	271251	275159	deletion	0.98	-1	homozygous	1	376	1589	53.6	not_applicable	EXOC2	HUS1B	7157	yes
FALSE	1126	6	2917791	6	2945426	6	2918025	6	2945660	1051	286754	317125	insertion	1	-1	heterozygous	1	-1	2737	33.1	not_applicable	-	SERPINB6	2733	yes
FALSE	1127	6	3211969	6	3224615	6	3212203	6	3224849	1051	584203	598815	insertion	1	-1	heterozygous	1	-1	1966	25.2	not_applicable	TUBB2B	TUBB2A	137	yes
FALSE	1129	6	5036318	6	5059628	6	5036552	6	5059862	10311	185162	206314	deletion	1	-1	homozygous	1	378	2158	66.9	not_applicable	AK094934;BC042032;DQ578550	PPP1R3G	25858	yes
FALSE	1131	6	5036318	6	5059628	6	5036552	6	5059862	10312	185162	206314	deletion	1	-1	homozygous	1	378	2158	66.9	not_applicable	AK094934;BC042032;DQ578550	PPP1R3G	25858	yes
FALSE	1133	6	13122406	6	13134963	6	13122638	6	13135195	1642	957136	974581	insertion	1	-1	homozygous	1	379	4888	93.4	not_applicable	PHACTR1;DQ601422	DQ587130	10232	yes
FALSE	1136	6	13499469	6	13514567	6	13499701	6	13514799	1641	1.34645e+06	1.36767e+06	insertion	1	-1	heterozygous	1	-1	6122	68.9	not_applicable	-	GFOD1	11833	yes
FALSE	1137	6	14515402	6	14541027	6	14515633	6	14541258	8611	165153	193187	insertion	0.99	-1	homozygous	1	380	2409	53.6	not_applicable	-	LINC01108	229949	yes
FALSE	1138	6	14515402	6	14541027	6	14515633	6	14541258	8612	165153	193187	insertion	0.99	-1	homozygous	1	380	2409	53.6	not_applicable	-	LINC01108	229949	yes
FALSE	1142	6	24808175	6	24830679	6	24808403	6	24830907	25501	2.79092e+06	2.80752e+06	deletion	1	-1	homozygous	1	382	5902	76.2	not_applicable	FAM65B	C6orf229	9280	yes
FALSE	1144	6	24808175	6	24830679	6	24808403	6	24830907	25502	2.79092e+06	2.80752e+06	deletion	1	-1	homozygous	1	382	5902	76.2	not_applicable	FAM65B	C6orf229	9280	yes
FALSE	1146	6	28697381	6	28725818	6	28665158	6	28693595	29881	889076	919609	insertion	0.99	-1	heterozygous	1	-1	2096	72.8	not_applicable	DQ598619;DQ598619	TRNA_Thr	200	yes
FALSE	1151	6	30464363	6	30491643	6	30432140	6	30459420	4272	475883	505331	insertion	1	-1	heterozygous	1	-1	2167	44.4	not_applicable	L13709;DQ580663;DQ588547;DQ586451;DQ594917;DQ591044;DQ589229;HLA-E	DQ578550	6732	yes
FALSE	1153	6	31216447	6	31249115	6	31184224	6	31216892	15561	228959	259011	deletion	0.99	-1	homozygous	1	384	2617	79.5	not_applicable	-	HCG27	12480	yes
FALSE	1155	6	31362798	6	31374356	6	31330575	6	31342133	15561	372220	380255	deletion	1	-1	homozygous	1	386	3524	2	not_applicable	-	MIR6891	7483	yes
FALSE	1156	6	31216447	6	31249115	6	31184224	6	31216892	15562	228959	259011	deletion	0.99	-1	homozygous	1	384	2617	79.5	not_applicable	-	HCG27	12480	yes
FALSE	1158	6	31362798	6	31374356	6	31330575	6	31342133	15562	372220	380255	deletion	1	-1	homozygous	1	386	3524	2	not_applicable	-	MIR6891	7483	yes
FALSE	1160	6	32808066	6	32814976	6	32775843	6	32782753	24741	299127	304878	deletion	0.99	-1	homozygous	1	387	1159	57	not_applicable	-	TAP2	10434	yes
FALSE	1161	6	33615197	6	33620169	6	33582974	6	33587946	24741	1.10603e+06	1.10836e+06	deletion	1	-1	homozygous	1	388	2647	48.3	not_applicable	-	ITPR3	1210	yes
FALSE	1162	6	32808066	6	32814976	6	32775843	6	32782753	24742	299127	304878	deletion	0.99	-1	homozygous	1	387	1159	57	not_applicable	-	TAP2	10434	yes
FALSE	1163	6	33615197	6	33620169	6	33582974	6	33587946	24742	1.10603e+06	1.10836e+06	deletion	1	-1	homozygous	1	388	2647	48.3	not_applicable	-	ITPR3	1210	yes
FALSE	1166	6	35795009	6	35808679	6	35762786	6	35776456	1101	2.07359e+06	2.09893e+06	insertion	1	-1	homozygous	1	391	11668	49.7	not_applicable	CLPS;LHFPL5	CLPSL1	6946	yes
FALSE	1169	6	35795009	6	35808679	6	35762786	6	35776456	1102	2.07359e+06	2.09893e+06	insertion	1	-1	homozygous	1	391	11668	49.7	not_applicable	CLPS;LHFPL5	CLPSL1	6946	yes
FALSE	1170	6	36944021	6	3.6956e+07	6	36911797	6	36923771	5001	525173	539681	insertion	1	-1	homozygous	1	392	2536	17.2	not_applicable	PI16	DQ586320	1748	yes
FALSE	1171	6	36944021	6	3.6956e+07	6	36911797	6	36923771	5002	525173	539681	insertion	1	-1	homozygous	1	392	2536	17.2	not_applicable	PI16	DQ586320	1748	yes
FALSE	1173	6	39844037	6	39850211	6	39811813	6	39817987	25051	2365781	2.37404e+06	insertion	1	-1	homozygous	1	393	2081	54.3	not_applicable	DAAM2	AX747174	33305	yes
FALSE	1176	6	39844037	6	39850211	6	39811813	6	39817987	25052	2365781	2.37404e+06	insertion	1	-1	homozygous	1	393	2081	54.3	not_applicable	DAAM2	AX747174	33305	yes
FALSE	1178	6	4.40403e+07	6	4.40492e+07	6	44008073	6	44016891	14721	218660	229953	insertion	1	-1	heterozygous	1	395	2474	44.4	not_applicable	AK024736	C6orf223	34379.5	yes
FALSE	1182	6	47459837	6	47478414	6	47427573	6	47446150	25971	1.48251e+06	1.50498e+06	insertion	1	-1	homozygous	1	396	3889	85.4	not_applicable	CD2AP	DQ588545	27949	yes
FALSE	1183	6	47459837	6	47478414	6	47427573	6	47446150	25972	1483445	1.50591e+06	insertion	1	-1	homozygous	1	396	3888	85.4	not_applicable	CD2AP	DQ588545	27949	yes
TRUE	1184	6	46882784	12	69038541	6	46850521	12	69432321	23121	5.07364e+06	4.908e+06	translocation_interchr	0	-1	unknown	-1	397	-1	0	pass	GPR116	BC042990	20689	yes
TRUE	1185	6	46882784	12	69038541	6	46850521	12	69432321	23122	3.50375e+06	3.33811e+06	translocation_interchr	0	-1	unknown	-1	397	-1	0	pass	GPR116	BC042990	20689	yes
FALSE	1186	6	5.40484e+07	6	54072823	6	53913200	6	53937621	3532	910863	929480	deletion	1	-1	heterozygous	1	-1	5805	39.1	not_applicable	-	MLIP	38595	yes
FALSE	1187	6	54623947	6	54631355	6	54488745	6	54496153	10631	257983	264256	deletion	0.99	-1	heterozygous	1	-1	1135	8.6	not_applicable	-	DD157417	139249	yes
FALSE	1189	6	60634275	6	60662040	6	57602022	6	57629787	25252	381539	404059	deletion	1	-1	heterozygous	1	-1	5244	22.5	not_applicable	-	DQ587130	184200	yes
FALSE	1190	6	64291061	6	64299891	6	65000954	6	65009784	31111	2.15568e+06	2.17001e+06	insertion	1	-1	homozygous	1	398	5501	55	not_applicable	EYS	DQ587130	225497	yes
FALSE	1191	6	64291061	6	64299891	6	65000954	6	65009784	31112	2.15448e+06	2.16881e+06	insertion	1	-1	homozygous	1	398	5501	55	not_applicable	EYS	DQ587130	225497	yes
FALSE	1193	6	66651785	6	66656866	6	67361678	6	67366759	28101	1.49653e+06	1.50042e+06	deletion	0.98	-1	heterozygous	1	400	1189	0.7	not_applicable	-	JC172208	34610	yes
FALSE	1195	6	66651785	6	66656866	6	67361678	6	67366759	28102	1.49653e+06	1.50042e+06	deletion	0.98	-1	heterozygous	1	400	1189	0.7	not_applicable	-	JC172208	34610	yes
FALSE	1197	6	67608595	6	67613004	6	68318488	6	68322897	24520	975691	985020	insertion	1	-1	homozygous	1	-1	4920	70.2	not_applicable	-	DQ587130	116966	yes
FALSE	1201	6	69562912	6	69569905	6	70272804	6	70279797	2931	1.69637e+06	1.70561e+06	insertion	1	-1	homozygous	1	402	2240	100	not_applicable	-	LMBRD1	105844	yes
FALSE	1202	6	69562912	6	69569905	6	70272804	6	70279797	2932	1.69637e+06	1.70561e+06	insertion	1	-1	homozygous	1	402	2240	100	not_applicable	-	LMBRD1	105844	yes
FALSE	1206	6	79366997	6	79411295	6	80076714	6	80121012	14211	141944	213624	insertion	1	-1	heterozygous	1	404	27382	86.8	not_applicable	-	BC070061	53614	yes
FALSE	1207	6	79366997	6	79377104	6	80076714	6	80086821	14212	141944	179627	insertion	1	-1	heterozygous	2	404	27575	86.8	not_applicable	-	BC070061	53614	yes
FALSE	1208	6	79896289	6	79910882	6	80606006	6	80620599	13681	147614	165046	insertion	1	-1	homozygous	1	405	2840	89.4	not_applicable	-	ELOVL4	3930	yes
FALSE	1209	6	79896289	6	79910882	6	80606006	6	80620599	13682	147614	165046	insertion	1	-1	homozygous	1	405	2840	89.4	not_applicable	-	ELOVL4	3930	yes
FALSE	1210	6	82255936	6	82281778	6	82965653	6	82991495	30361	674771	710833	insertion	1	-1	homozygous	1	406	10219	68.2	not_applicable	-	IBTK	8206	yes
FALSE	1212	6	82255936	6	82281778	6	82965653	6	82991495	30362	674771	710833	insertion	1	-1	homozygous	1	406	10219	68.2	not_applicable	-	IBTK	8206	yes
FALSE	1213	6	84600312	6	84617602	6	85310030	6	85327320	6451	668490	680579	deletion	1	-1	homozygous	1	407	5200	74.2	not_applicable	-	DQ596630	12338	yes
FALSE	1214	6	84600312	6	84617602	6	85310030	6	85327320	6452	668490	680579	deletion	1	-1	homozygous	1	407	5200	74.2	not_applicable	-	DQ596630	12338	yes
FALSE	1215	6	85998091	6	86007304	6	86707809	6	86717022	25621	1.33368e+06	1336817	deletion	1	-1	homozygous	1	408	6076	92.1	not_applicable	-	DQ571824	82138	yes
FALSE	1216	6	85998091	6	86007304	6	86707809	6	86717022	25622	1335817	1.33895e+06	deletion	1	-1	homozygous	1	408	6077	92.1	not_applicable	-	DQ571824	82138	yes
FALSE	1223	6	96982362	6	96985358	6	97430238	6	97433234	13131	7280.6	11317.3	insertion	1	-1	homozygous	1	411	1041	15.2	not_applicable	KLHL32	NDUFAF4	84472	yes
FALSE	1224	6	96982362	6	96985358	6	97430238	6	97433234	13132	7280.6	11317.3	insertion	1	-1	homozygous	1	411	1041	15.2	not_applicable	KLHL32	NDUFAF4	84472	yes
FALSE	1225	6	9.97666e+07	6	9.97797e+07	6	100214475	6	100227615	31071	447258	461426	insertion	1	-1	homozygous	1	412	1029	16.6	not_applicable	-	DQ598327	115606	yes
FALSE	1226	6	9.97666e+07	6	9.97797e+07	6	100214475	6	100227615	31072	447258	461426	insertion	1	-1	homozygous	1	412	1029	16.6	not_applicable	-	DQ598327	115606	yes
FALSE	1229	6	106992281	6	1.07007e+08	6	107313481	6	107328440	6660	871467	889298	insertion	1	-1	homozygous	1	-1	2877	63.6	not_applicable	-	CD24	17528	yes
FALSE	1231	6	110848156	6	110853851	6	111169359	6	111175054	28021	1.39625e+06	1.4008e+06	deletion	0.99	-1	heterozygous	1	-1	1140	0	not_applicable	-	AMD1	20933	yes
FALSE	1232	6	114786274	6	114789957	6	115107438	6	115111121	1441	1.74986e+06	1.75476e+06	insertion	1	-1	heterozygous	1	-1	1220	49	not_applicable	-	DQ587130	111635	yes
FALSE	1234	6	125793273	6	125880386	6	126114419	6	126201532	12532	135498	135498	deletion	1	-1	heterozygous	1	413	87113	0	not_applicable	NCOA7	DQ575658	12956	yes
FALSE	1235	6	125861438	6	125880386	6	126182584	6	126201532	12531	173837	188538	deletion	1	-1	heterozygous	2	413	4247	19.9	not_applicable	NCOA7	DQ596869	31764	yes
FALSE	1236	6	127999358	6	128011380	6	128320503	6	128332525	24000	982611	998657	insertion	1	-1	homozygous	1	-1	4024	97.4	not_applicable	PTPRK	THEMIS	98278	yes
FALSE	1239	6	132704661	6	132717653	6	133025800	6	133038792	31651	3.80795e+06	3.8232e+06	insertion	1	-1	heterozygous	1	-1	2255	17.2	not_applicable	VNN1	VNN3	5134	yes
FALSE	1240	6	133015998	6	133031991	6	133337137	6	133353130	31651	4.12076e+06	4.13083e+06	deletion	1	-1	homozygous	1	415	5922	68.2	not_applicable	-	LINC00326	56089	yes
FALSE	1242	6	133015998	6	133031991	6	133337137	6	133353130	31652	4.1187e+06	4.12877e+06	deletion	1	-1	homozygous	1	415	5923	68.2	not_applicable	-	LINC00326	56089	yes
FALSE	1248	6	142128909	6	142130107	6	142450046	6	142451244	17922	99717.3	107198	insertion	1	-1	heterozygous	2	418	6282	25.2	not_applicable	-	VTA1	17055	yes
FALSE	1250	6	148735405	6	148740378	6	149056541	6	149061514	27740	263343	271805	insertion	1	-1	homozygous	1	-1	3489	96	not_applicable	-	UST	6757	yes
FALSE	1253	6	152702157	6	152721835	6	153023292	6	153042970	6282	642173	657808	deletion	1	-1	heterozygous	1	-1	4043	72.8	not_applicable	MYCT1	DQ600650	19138	yes
FALSE	1255	6	1.57139e+08	6	157156047	6	157460098	6	157477181	7861	651888	670300	insertion	1	-1	heterozygous	1	-1	1328	66.2	not_applicable	ARID1B	TMEM242	132975	yes
FALSE	1256	6	157266134	6	157276987	6	157613497	6	157698019	7861	527857	540350	insertion	1	-1	homozygous	1	419	1639	30.5	not_applicable	-	TMEM242	12035	yes
FALSE	1258	6	1.57534e+08	6	1.57554e+08	6	157955021	6	157974680	7861	216174	242196	insertion	1	-1	homozygous	1	421	6363	67.5	not_applicable	ZDHHC14;L13714	MIR3692	4789.5	yes
FALSE	1260	6	157266134	6	157276987	6	157613497	6	157698019	7862	529649	542141	insertion	1	-1	homozygous	1	419	1639	30.5	not_applicable	-	TMEM242	12035	yes
FALSE	1262	6	1.57534e+08	6	1.57554e+08	6	157955021	6	157974680	7862	217965	243987	insertion	1	-1	homozygous	1	421	6362	67.5	not_applicable	ZDHHC14;L13714	MIR3692	4789.5	yes
FALSE	1263	6	160212826	6	160220735	6	160633858	6	160641767	7712	203186	214456	insertion	1	-1	homozygous	1	422	3362	97.4	not_applicable	SLC22A2	DQ600650	13237	yes
FALSE	1264	6	160456062	6	160464671	6	160877094	6	160885703	7712	450524	460422	insertion	1	-1	homozygous	1	423	1289	94	not_applicable	-	DQ580215	1351	yes
FALSE	1265	6	160212826	6	160220735	6	160633858	6	160641767	7711	176878	188149	insertion	1	-1	homozygous	1	422	3361	97.4	not_applicable	SLC22A2	DQ600650	13237	yes
FALSE	1266	6	160456062	6	160464671	6	160877094	6	160885703	7711	424216	434114	insertion	1	-1	homozygous	1	423	1288	94	not_applicable	-	DQ580215	1351	yes
FALSE	1267	6	161753940	6	161763503	6	162174972	6	162184535	2871	528490	542155	insertion	1	-1	heterozygous	1	-1	4101	49	not_applicable	PARK2	HV555621	58440	yes
FALSE	1269	6	165308833	6	165325753	6	165722322	6	165739242	19632	198170	207769	deletion	0.99	-1	heterozygous	1	-1	7322	11.9	not_applicable	C6orf118	PDE10A	1534	yes
FALSE	1270	6	166025755	6	1.66033e+08	6	166439243	6	166446789	10400	43142.8	51982.5	insertion	1	-1	homozygous	1	-1	1295	74.8	not_applicable	-	DQ571824	3813.2	yes
FALSE	1272	6	167382969	6	1.67391e+08	6	167796457	6	167804256	6581	54025.8	60628.5	deletion	0.99	-1	heterozygous	1	-1	1195	9.3	not_applicable	TCP10	DQ580215	15998	yes
FALSE	1273	6	167432673	6	167445250	6	167846161	6	167857467	6581	102170	116223	insertion	1	-1	homozygous	1	424	1476	90.1	not_applicable	-	DQ580986	37423	yes
FALSE	1275	6	167987784	6	168005299	6	168388464	6	168405979	6581	613795	633163	insertion	1	-1	homozygous	1	426	1854	64.2	not_applicable	KIF25-AS1	HGC6.3	10846	yes
FALSE	1276	6	167432673	6	167445250	6	167846161	6	167857467	6582	103550	117603	insertion	1	-1	homozygous	1	424	1477	90.1	not_applicable	-	DQ580986	37423	yes
FALSE	1278	6	167987784	6	168005299	6	168388464	6	168405979	6582	615175	634544	insertion	1	-1	homozygous	1	426	1853	64.2	not_applicable	KIF25-AS1	HGC6.3	10846	yes
FALSE	1281	6	168859340	6	1.68875e+08	6	169259435	6	169274897	10941	13001.8	26199.5	deletion	0.99	-1	heterozygous	1	-1	2263	0	not_applicable	-	JB620871	44119.5	yes
FALSE	1286	6	170494412	6	170505614	6	170803500	6	170814702	21671	239417	252299	insertion	1	-1	heterozygous	1	-1	1680	54.3	not_applicable	-	PSMB1	29502	yes
FALSE	1289	7	219755	7	227943	7	219755	7	227943	31482	1.89664e+06	1.90312e+06	deletion	0.98	-1	heterozygous	1	-1	1715	37.7	not_applicable	FAM20C;AX746542	WI2-2373I1.2	62227	yes
FALSE	1292	7	579452	7	590311	7	619089	7	629948	31482	1.52839e+06	1541297	insertion	1	-1	homozygous	1	431	2047	85.4	not_applicable	PRKAR1B	AC147651.4	12534	yes
FALSE	1293	7	903196	7	927587	7	942833	7	967223	31482	1.17839e+06	1.21425e+06	insertion	1	-1	homozygous	1	432	11461	53	not_applicable	ADAP1	GET4	6763	yes
FALSE	1294	7	1131659	7	1151045	7	1171295	7	1190681	31482	955552	972587	deletion	1	-1	homozygous	1	433	2352	22.5	not_applicable	C7orf50	ZFAND2A	1862	yes
FALSE	1295	7	1193613	7	1197327	7	1233249	7	1236963	31482	898784	913072	insertion	1	-1	homozygous	1	434	10574	25.8	not_applicable	-	AC091729.9	27656	yes
FALSE	1296	7	1271955	7	1277783	7	1311591	7	1317419	31482	815938	822938	insertion	1	-1	homozygous	1	435	1171	17.2	not_applicable	-	UNCX	34979	yes
FALSE	1297	7	209809	7	219755	7	209809	7	219755	31481	1957765	1.97066e+06	insertion	1	-1	heterozygous	1	-1	2952	21.2	not_applicable	FAM20C	AX746542	7799	yes
FALSE	1299	7	346117	7	359071	7	386083	7	399037	31481	1.81477e+06	1829551	insertion	1	-1	heterozygous	1	-1	1827	86.8	not_applicable	-	AC226118.1	20354	yes
FALSE	1301	7	579452	7	590311	7	619089	7	629948	31481	1.57843e+06	1.59133e+06	insertion	1	-1	homozygous	1	431	2046	85.4	not_applicable	PRKAR1B	AC147651.4	12534	yes
FALSE	1302	7	903196	7	927587	7	942833	7	967223	31481	1.23394e+06	1.26428e+06	insertion	1	-1	homozygous	1	432	5948	53	not_applicable	ADAP1	GET4	6763	yes
FALSE	1303	7	1131659	7	1151045	7	1171295	7	1190681	31481	1.0111e+06	1.02814e+06	deletion	1	-1	homozygous	1	433	2351	22.5	not_applicable	C7orf50	ZFAND2A	1862	yes
FALSE	1304	7	1193613	7	1197327	7	1233249	7	1236963	31481	956430	968621	insertion	1	-1	homozygous	1	434	8476	31.8	not_applicable	-	AC091729.9	27656	yes
FALSE	1305	7	1271955	7	1277783	7	1311591	7	1317419	31481	873584	880584	insertion	1	-1	homozygous	1	435	1172	17.2	not_applicable	-	UNCX	34979	yes
FALSE	1306	7	1874090	7	1893158	7	1913726	7	1932794	31481	250941	272334	insertion	1	-1	heterozygous	1	-1	2325	35.8	not_applicable	MAD1L1	AK127048	24160	yes
FALSE	1308	7	3972510	7	3979293	7	4012142	7	4018925	28221	1.00679e+06	1.015e+06	insertion	1	-1	heterozygous	1	-1	1425	54.3	not_applicable	SDK1	HV555621	168986	yes
FALSE	1309	7	4567848	7	4.58803e+06	7	4607479	7	4627663	28221	1.60693e+06	1.61873e+06	deletion	1	-1	homozygous	1	436	8379	57.6	not_applicable	EF153349;env;ERVK6	DQ578550	3674.5	yes
FALSE	1310	7	4567848	7	4.58803e+06	7	4607479	7	4627663	28222	1.53575e+06	1.54756e+06	deletion	1	-1	homozygous	1	436	8380	57.6	not_applicable	EF153349;env;ERVK6	DQ578550	3674.5	yes
FALSE	1313	7	8315848	7	8337064	7	8355478	7	8376694	71	2.40157e+06	2.42534e+06	insertion	1	-1	homozygous	1	437	2553	58.9	not_applicable	-	AX746880	7859	yes
FALSE	1314	7	9082381	7	9084908	7	9122011	7	9124538	71	3.17057e+06	3.17671e+06	insertion	1	-1	heterozygous	1	-1	3615	70.9	not_applicable	-	RBSG3	12363	yes
FALSE	1315	7	8315848	7	8337064	7	8355478	7	8376694	72	2.40157e+06	2.42534e+06	insertion	1	-1	homozygous	1	437	2553	58.9	not_applicable	-	AX746880	7859	yes
FALSE	1316	7	8834033	7	8.85485e+06	7	8873663	7	8894479	72	2.92065e+06	2.9477e+06	insertion	1	-1	heterozygous	1	-1	6238	20.5	not_applicable	-	DQ593458	11933	yes
FALSE	1317	7	9022635	7	9082381	7	9062265	7	9122011	72	3114653	3.18054e+06	insertion	1	-1	heterozygous	1	-1	6143	72.8	not_applicable	-	RBSG3	14890	yes
FALSE	1318	7	13540779	7	13564277	7	13580404	7	13603902	491	1.38977e+06	1.40759e+06	deletion	1	-1	heterozygous	1	-1	5676	0.7	not_applicable	-	DQ597681	4921	yes
FALSE	1319	7	14469809	7	14485213	7	14509434	7	14524838	491	2.3096e+06	2.3269e+06	insertion	1	-1	homozygous	1	438	1889	75.5	not_applicable	DGKB	L13714	281314	yes
FALSE	1320	7	14469809	7	14485213	7	14509434	7	14524838	492	2.30788e+06	2325175	insertion	1	-1	homozygous	1	438	1889	75.5	not_applicable	DGKB	L13714	281314	yes
FALSE	1322	7	1.68456e+07	7	16881679	7	16885247	7	16921303	532	1.72427e+06	1.74368e+06	deletion	1	-1	heterozygous	1	-1	16654	0.7	not_applicable	AGR3	AGR2	40509.8	yes
FALSE	1323	7	19471338	7	19488514	7	19510961	7	19528137	14581	155474	177453	insertion	1	-1	homozygous	1	439	4803	77.5	not_applicable	-	DQ587130	39914	yes
FALSE	1324	7	19471338	7	19488514	7	19510961	7	19528137	14582	155474	177453	insertion	1	-1	homozygous	1	439	4803	77.5	not_applicable	-	DQ587130	39914	yes
FALSE	1326	7	20706786	7	20742499	7	20746409	7	20782122	2621	34519.3	65535.3	deletion	1	-1	homozygous	1	440	4697	9.3	not_applicable	ABCB5	DQ586320	37258	yes
FALSE	1327	7	20706786	7	20742499	7	20746409	7	20782122	2622	34519.3	65535.3	deletion	1	-1	homozygous	1	440	4697	9.3	not_applicable	ABCB5	DQ586320	37258	yes
FALSE	1333	7	3.23453e+07	7	32354628	7	32384927	7	32394240	3571	833207	839620	deletion	1	-1	homozygous	1	443	2901	76.8	not_applicable	-	DQ578550	32503	yes
FALSE	1334	7	3.23453e+07	7	32354628	7	32384927	7	32394240	3572	833207	839620	deletion	1	-1	homozygous	1	443	2901	76.8	not_applicable	-	DQ578550	32503	yes
FALSE	1335	7	34800007	7	34806473	7	34839619	7	34846085	321	1.22684e+06	1.23447e+06	insertion	1	-1	homozygous	1	444	1161	71.5	not_applicable	NPSR1	NPSR1-AS1	41736	yes
FALSE	1336	7	34800007	7	34806473	7	34839619	7	34846085	322	1.22684e+06	1.23447e+06	insertion	1	-1	homozygous	1	444	1161	71.5	not_applicable	NPSR1	NPSR1-AS1	41736	yes
TRUE	1337	7	38373352	7	54322632	7	38412953	7	54390325	26301	1.50865e+06	1.6304e+06	translocation_intrachr	0	-1	heterozygous	1	-1	-1	0	pass	TRG-AS1	TCRGV	9835	yes
TRUE	1339	7	38330233	7	38373352	7	38369834	7	38412953	26302	1.4647e+06	1.49892e+06	deletion	0.99	-1	heterozygous	1	-1	8899	17.2	not_applicable	AK291611;TRG-AS1;Y00482;TRGV3;TCRGV	AMPH	10344	yes
TRUE	1350	7	49153657	12	69519272	7	49193253	12	69913052	25451	200121	187847	translocation_interchr	0.11	-1	heterozygous	1	449	-1	0	pass	FRS2	MIR3913-1	65450	yes
TRUE	1352	7	49153657	12	69519272	7	49193253	12	69913052	25452	200121	187847	translocation_interchr	0.1	-1	heterozygous	1	449	-1	0	pass	FRS2	MIR3913-1	65450	yes
FALSE	1353	7	49112923	7	49117687	7	49152519	7	49157283	14941	91292.8	95048.1	deletion	0.99	-1	homozygous	1	448	1008	0	not_applicable	-	CDC14C	185471	yes
FALSE	1354	7	49679465	7	49700651	7	49719061	7	49740247	14941	654863	669875	deletion	0.99	-1	homozygous	1	450	6175	73.5	not_applicable	-	DQ596630	11162	yes
FALSE	1355	7	49112923	7	49117687	7	49152519	7	49157283	14942	17416.1	21171.4	deletion	0.99	-1	homozygous	1	448	1009	0	not_applicable	-	CDC14C	185471	yes
FALSE	1356	7	49679465	7	49700651	7	49719061	7	49740247	14942	580986	595998	deletion	0.99	-1	homozygous	1	450	6175	73.5	not_applicable	-	DQ596630	11162	yes
FALSE	1357	7	55213754	7	55233921	7	55281447	7	55301614	472	1.60123e+06	1.61897e+06	deletion	1	-1	heterozygous	1	-1	2426	67.5	not_applicable	DQ578550;DQ575296;DQ588547;DQ598327	GU228584	2127	yes
TRUE	1361	7	57943703	7	100949356	7	58003409	7	100546988	26881	1.5916e+06	1.37178e+06	translocation_intrachr	0	-1	homozygous	1	452	-1	0	pass	-	MUC3	5430	yes
TRUE	1363	7	57943703	7	100949356	7	58003409	7	100546988	26882	1.5916e+06	1.37178e+06	translocation_intrachr	0	-1	homozygous	1	452	-1	0	pass	-	MUC3	5430	yes
FALSE	1368	7	64834574	7	64863370	7	64294952	7	64323748	31681	387369	413795	deletion	0.99	-1	homozygous	1	455	2370	72.2	not_applicable	-	ZNF138	894	yes
FALSE	1369	7	64834574	7	64863370	7	64294952	7	64323748	31682	387369	413795	deletion	0.99	-1	homozygous	1	455	2370	72.2	not_applicable	-	ZNF138	894	yes
FALSE	1376	7	68750731	7	68761867	7	68215718	7	68226854	2000	1.16302e+06	1.1768e+06	insertion	1	-1	homozygous	1	-1	2648	94.7	not_applicable	-	HV555621	212754	yes
FALSE	1378	7	70969523	7	70979773	7	70434509	7	70444759	24222	1089455	1.09348e+06	deletion	1	-1	heterozygous	1	-1	6222	45	not_applicable	-	DQ596630	58340	yes
TRUE	1389	7	78523224	7	78702672	7	78152541	7	78331988	26571	338151	382148	deletion	1	-1	homozygous	1	460	135450	0	not_applicable	MAGI2;L13714;JC172208	RPL13AP17	163772	yes
TRUE	1390	7	78523224	7	78702672	7	78152541	7	78331988	26572	338151	382148	deletion	1	-1	homozygous	1	460	135450	0	not_applicable	MAGI2;L13714;JC172208	RPL13AP17	163772	yes
FALSE	1393	7	8.73064e+07	7	87324768	7	86935747	7	86954084	17970	198462	204850	deletion	1	-1	homozygous	1	-1	11950	1.3	not_applicable	-	TP53TG1	580	yes
FALSE	1395	7	91585190	7	91596858	7	91214505	7	91226173	1551	782988	788531	deletion	1	-1	homozygous	1	461	6125	53	not_applicable	-	DQ571826	85148	yes
FALSE	1396	7	91585190	7	91596858	7	91214505	7	91226173	1552	782988	788531	deletion	1	-1	homozygous	1	461	6125	53	not_applicable	-	DQ571826	85148	yes
FALSE	1397	7	93692684	7	9.37253e+07	7	93321996	7	93354641	25151	3.32844e+06	3.3559e+06	deletion	1	-1	homozygous	1	462	5187	21.2	not_applicable	AF279777;MIR4652	DQ575296	106119	yes
FALSE	1398	7	96838169	7	96860256	7	96467481	7	96489568	25151	206340	222025	deletion	1	-1	homozygous	1	463	6401	96.7	not_applicable	-	DQ596066	3402	yes
FALSE	1400	7	93692684	7	9.37253e+07	7	93321996	7	93354641	25152	3.32844e+06	3.3559e+06	deletion	1	-1	homozygous	1	462	5187	21.2	not_applicable	AF279777;MIR4652	DQ575296	106119	yes
FALSE	1401	7	96838169	7	96860256	7	96467481	7	96489568	25152	206340	222025	deletion	1	-1	homozygous	1	463	6401	96.7	not_applicable	-	DQ596066	3402	yes
FALSE	1403	7	98807508	7	98825154	7	98405131	7	98422777	30111	644251	664917	insertion	1	-1	homozygous	1	465	3021	96.7	not_applicable	-	TMEM130	21334	yes
FALSE	1404	7	98807508	7	98825154	7	98405131	7	98422777	30112	644251	664917	insertion	1	-1	homozygous	1	465	3021	96.7	not_applicable	-	TMEM130	21334	yes
FALSE	1410	7	102250616	7	1.02262e+08	7	101893896	7	101905536	30722	233507	246161	insertion	1	-1	heterozygous	1	-1	1015	44.4	not_applicable	CUX1	SH2B2	22858.5	yes
FALSE	1414	7	108103888	7	1.08139e+08	7	107744333	7	107779121	19861	242734	272687	deletion	1	-1	homozygous	1	468	4833	0	not_applicable	LAMB4	NRCAM	8950.5	yes
FALSE	1418	7	111618606	7	111643923	7	111258662	7	111283979	8661	577714	605838	insertion	1	-1	homozygous	1	470	2806	2.6	not_applicable	-	U02063	2124	yes
FALSE	1420	7	111618606	7	111643923	7	111258662	7	111283979	8662	577714	605838	insertion	1	-1	homozygous	1	470	2806	2.6	not_applicable	-	U02063	2124	yes
FALSE	1421	7	113770749	7	113791390	7	113410804	7	113431445	16161	93418.7	107881	deletion	1	-1	homozygous	1	471	6178	88.7	not_applicable	-	DQ576987	499	yes
FALSE	1422	7	113770749	7	113791390	7	113410804	7	113431445	16162	93418.7	107881	deletion	1	-1	homozygous	1	471	6178	88.7	not_applicable	-	DQ576987	499	yes
FALSE	1423	7	126394371	7	126411839	7	126034425	7	126051893	4751	1.77323e+06	1.78516e+06	deletion	1	-1	homozygous	1	472	5544	41.1	not_applicable	-	GRM8	26759	yes
FALSE	1424	7	126394371	7	126411839	7	126034425	7	126051893	4752	1.77323e+06	1.78516e+06	deletion	1	-1	homozygous	1	472	5544	41.1	not_applicable	-	GRM8	26759	yes
FALSE	1432	7	134090610	7	134122462	7	133775363	7	133807215	9810	510329	528867	deletion	1	-1	homozygous	1	-1	13314	22.5	not_applicable	DQ595317	LRGUK	4890	yes
FALSE	1433	7	135068107	7	1.35078e+08	7	134752858	7	134762265	16052	108579	119155	insertion	1	-1	heterozygous	1	-1	1171	0	not_applicable	AGBL3	C7orf49	14853.5	yes
FALSE	1434	7	138228253	7	138230924	7	137912999	7	137915670	5971	2.44303e+06	2.44851e+06	insertion	1	-1	homozygous	1	474	2815	51	not_applicable	-	JC172208	67106	yes
FALSE	1435	7	138228253	7	138230924	7	137912999	7	137915670	5972	2.44428e+06	2.44977e+06	insertion	1	-1	homozygous	1	474	2815	51	not_applicable	-	JC172208	67106	yes
FALSE	1436	7	141336178	7	141342663	7	141035978	7	141042463	12271	399564	407423	insertion	1	-1	homozygous	1	475	1373	76.2	not_applicable	TMEM178B	AGK	208615	yes
FALSE	1437	7	141336178	7	141342663	7	141035978	7	141042463	12272	399564	407423	insertion	1	-1	homozygous	1	475	1373	76.2	not_applicable	TMEM178B	AGK	208615	yes
FALSE	1438	7	142066836	7	142100862	7	141766636	7	141800662	11400	360622	365676	deletion	1	-1	homozygous	1	-1	28971	14.6	not_applicable	MGAM	LOC93432	10887	yes
FALSE	1439	7	142351595	7	142355487	7	142101196	#N/A	#N/A	11400	85013.9	110502	insertion	1	-1	homozygous	1	-1	21597	32.5	not_applicable	TRBC2;AY006239;TCRBV6S5A1N1	TCRBV13S2A1T	1928	yes
FALSE	1440	7	142768532	7	142772469	7	142476379	7	142480328	1681	331715	356146	insertion	1	-1	homozygous	1	476	20495	57	not_applicable	TRBC2;TRBV4-2;AY006189;AY006094;TCRBV2S1;TRBC1;AY006263;PRSS2	AF395795	14412	yes
FALSE	1442	7	142768532	7	142772469	7	142476379	7	142480328	1682	331715	356146	insertion	1	-1	homozygous	1	476	20495	57	not_applicable	TRBC2;TRBV4-2;AY006189;AY006094;TCRBV2S1;TRBC1;AY006263;PRSS2	AF395795	14412	yes
FALSE	1445	7	148358954	7	148400465	7	148056046	7	148097557	10751	611951	650084	deletion	0.99	-1	homozygous	1	478	3378	31.1	not_applicable	CNTNAP2	DQ578736	62006	yes
FALSE	1446	7	148358954	7	148400465	7	148056046	7	148097557	10752	611951	650084	deletion	0.99	-1	homozygous	1	478	3378	31.1	not_applicable	CNTNAP2	DQ578736	62006	yes
FALSE	1449	7	153504683	7	153509987	7	153201768	7	153207072	6030	139787	147041	insertion	1	-1	homozygous	1	-1	1950	66.9	not_applicable	-	DQ593458	9258	yes
FALSE	1450	7	154599973	7	154613034	7	154391683	7	154404744	18270	128205	133391	deletion	1	-1	homozygous	1	-1	7875	46.4	not_applicable	DPP6	PAXIP1-AS2	315483	yes
FALSE	1451	7	1.55313e+08	7	155340069	7	155104901	7	155132309	6121	198656	231415	insertion	1	-1	heterozygous	1	479	5881	72.8	not_applicable	-	INSIG1	2956.5	yes
FALSE	1452	7	1.55313e+08	7	155353458	7	155104901	7	155146158	6122	184102	231415	insertion	1	-1	heterozygous	2	479	7045	63.6	not_applicable	-	INSIG1	2956.5	yes
FALSE	1453	7	155784409	7	155796628	7	155577103	7	155589322	10590	236214	250614	insertion	1	-1	homozygous	1	-1	2181	96	not_applicable	-	RBM33	2925	yes
FALSE	1454	7	155890777	7	155893413	7	155683471	7	155686107	10590	136091	141538	insertion	1	-1	homozygous	1	-1	2812	92.7	not_applicable	-	Mir_598	40475	yes
FALSE	1455	7	155926706	7	155940356	7	155719400	7	155733050	10590	89800.3	102428	deletion	0.99	-1	homozygous	1	-1	1023	55.6	not_applicable	Mir_598	SHH	114434	yes
FALSE	1456	7	157773495	7	157776918	7	157566187	7	157569610	13151	133196	137673	insertion	1	-1	homozygous	1	480	1055	82.8	not_applicable	PTPRN2	AC011899.9	77667	yes
FALSE	1457	7	157773495	7	157776918	7	157566187	7	157569610	13152	133196	137673	insertion	1	-1	homozygous	1	480	1055	82.8	not_applicable	PTPRN2	AC011899.9	77667	yes
FALSE	1458	7	158082084	7	158092755	7	157874776	7	157885447	14610	43180.3	52750.5	deletion	0.99	-1	homozygous	1	-1	1101	3.3	not_applicable	PTPRN2	DQ571824	7577	yes
FALSE	1459	7	158143103	7	158160589	7	157935795	7	157953281	14610	104066	140646	insertion	1	-1	homozygous	1	-1	19095	39.1	not_applicable	PTPRN2	DQ571824	42745	yes
FALSE	1461	7	158331173	7	158361910	7	158123865	7	158154602	10281	66641.4	99415	insertion	1	-1	homozygous	1	482	2037	29.1	not_applicable	PTPRN2	DQ583297	34643	yes
FALSE	1462	7	158424619	7	158430847	7	158217311	7	158223539	10281	164493	169381	deletion	0.98	-1	homozygous	1	483	1339	36.4	not_applicable	PTPRN2	JC172092	85440	yes
FALSE	1463	7	1.58584e+08	7	1.58604e+08	7	158376375	7	158396519	10281	322561	351155	insertion	1	-1	homozygous	1	484	8451	51.7	not_applicable	PTPRN2;MIR5707	NCAPG2	35969.2	yes
FALSE	1465	7	158331173	7	158361910	7	158123865	7	158154602	10282	66641.4	99415	insertion	1	-1	homozygous	1	482	2037	29.1	not_applicable	PTPRN2	DQ583297	34643	yes
FALSE	1466	7	158424619	7	158430847	7	158217311	7	158223539	10282	164493	169381	deletion	0.98	-1	homozygous	1	483	1339	36.4	not_applicable	PTPRN2	JC172092	85440	yes
FALSE	1467	7	1.58584e+08	7	1.58604e+08	7	158376375	7	158396519	10282	322561	351155	insertion	1	-1	homozygous	1	484	8451	51.7	not_applicable	PTPRN2;MIR5707	NCAPG2	35969.2	yes
FALSE	1468	8	644249	8	661195	8	594249	8	611195	30061	366617	381035	deletion	1	-1	heterozygous	1	485	2528	45.7	not_applicable	AK128400	ERICH1	3005	yes
FALSE	1470	8	989573	8	996325	8	939573	8	946325	30062	25152.5	33195.6	insertion	1	-1	homozygous	1	-1	1291	8.6	not_applicable	ERICH1-AS1	DQ591044	16696	yes
FALSE	1472	8	1232341	8	1244159	8	1182341	8	1194159	13821	83050.8	92588.6	deletion	1	-1	homozygous	1	487	2280	68.2	not_applicable	-	LOC286083	51875	yes
FALSE	1473	8	1390126	8	1413734	8	1338292	8	1361900	13821	239906	258180	deletion	1	-1	heterozygous	1	488	5334	68.2	not_applicable	-	LOC286083	87459	yes
FALSE	1474	8	1.2054e+06	8	1211043	8	1155399	8	1161043	13822	54261.7	61195.8	insertion	1	-1	homozygous	1	486	1289	31.8	not_applicable	-	LOC286083	84991	yes
FALSE	1475	8	1232341	8	1244159	8	1182341	8	1194159	13822	83050.8	92588.6	deletion	1	-1	homozygous	1	487	2280	68.2	not_applicable	-	LOC286083	51875	yes
FALSE	1476	8	1390126	8	1413734	8	1338292	8	1361900	13822	239906	253773	deletion	1	-1	heterozygous	2	488	9740	95.4	not_applicable	-	LOC286083	87459	yes
FALSE	1477	8	1828298	8	1833553	8	1776464	8	1781719	16931	155985	162276	insertion	1	-1	homozygous	1	489	1035	42.4	not_applicable	ARHGEF10	MIR596	10992	yes
FALSE	1478	8	1835261	8	1847846	8	1783427	8	1796012	16931	163890	177839	insertion	1	-1	heterozygous	1	490	1364	60.3	not_applicable	ARHGEF10	MIR596	17955	yes
FALSE	1480	8	1828298	8	1833553	8	1776464	8	1781719	16932	155985	162276	insertion	1	-1	homozygous	1	489	1035	42.4	not_applicable	ARHGEF10	MIR596	10992	yes
FALSE	1481	8	1843253	8	1847846	8	1791419	8	1796012	16932	172036	177839	insertion	1	-1	heterozygous	2	490	1211	50.3	not_applicable	ARHGEF10	MIR596	25947	yes
FALSE	1483	8	4265096	8	4.27073e+06	8	4122618	8	4128255	1962	1.69169e+06	1.69517e+06	deletion	1	-1	heterozygous	1	-1	2155	15.9	not_applicable	CSMD1	U02063	93810.5	yes
FALSE	1491	8	8426321	8	8436475	8	8283831	8	8293985	30051	2.06411e+06	2.06967e+06	deletion	1	-1	heterozygous	1	-1	4591	1.3	not_applicable	-	SGK223	44575	yes
FALSE	1492	8	9770112	8	9773789	8	9627622	8	9631299	27811	486811	493017	insertion	1	-1	homozygous	1	494	2529	98	not_applicable	TNKS	MIR597	28345	yes
FALSE	1493	8	9770112	8	9773789	8	9627622	8	9631299	27812	486811	493017	insertion	1	-1	homozygous	1	494	2529	98	not_applicable	TNKS	MIR597	28345	yes
FALSE	1496	8	21043017	8	21050939	8	20900528	8	20908450	5991	569065	581415	insertion	1	-1	homozygous	1	496	4428	37.1	not_applicable	-	RP11-421P23.1	47899	yes
FALSE	1497	8	21515114	8	21517645	8	21372625	8	21375156	5991	100590	104751	insertion	1	-1	homozygous	1	497	1630	96.7	not_applicable	-	DD413516	80981	yes
FALSE	1498	8	21043017	8	21050939	8	20900528	8	20908450	5992	569065	580027	insertion	1	-1	homozygous	1	496	3039	57.6	not_applicable	-	RP11-421P23.1	47899	yes
FALSE	1499	8	21515114	8	21517645	8	21372625	8	21375156	5992	100590	104751	insertion	1	-1	homozygous	1	497	1630	96.7	not_applicable	-	DD413516	80981	yes
FALSE	1500	8	21765511	8	21771265	8	21623023	8	21628777	4661	869826	878123	insertion	1	-1	homozygous	1	498	2544	98.7	not_applicable	GFRA2	DQ598327	52543	yes
FALSE	1501	8	21765511	8	21771265	8	21623023	8	21628777	4662	869826	878123	insertion	1	-1	homozygous	1	498	2544	98.7	not_applicable	GFRA2	DQ598327	52543	yes
FALSE	1503	8	25068811	8	25073234	8	24926326	8	24930749	611	1.2902e+06	1.29757e+06	insertion	1	-1	homozygous	1	499	2955	25.2	not_applicable	-	DQ588547	29629	yes
FALSE	1504	8	25068811	8	25073234	8	24926326	8	24930749	612	1.2902e+06	1.29757e+06	insertion	1	-1	homozygous	1	499	2955	25.2	not_applicable	-	DQ588547	29629	yes
FALSE	1508	8	32808632	8	32855019	8	32666150	8	32712537	3681	398810	434028	deletion	1	-1	homozygous	1	500	11168	72.8	not_applicable	-	NRG1	43593	yes
FALSE	1509	8	32808632	8	32855019	8	32666150	8	32712537	3682	528534	563753	deletion	1	-1	homozygous	1	500	11169	72.8	not_applicable	-	NRG1	43593	yes
FALSE	1511	8	34440191	8	34447939	8	34297709	8	34305457	8532	393566	405223	insertion	1	-1	homozygous	1	502	3909	33.8	not_applicable	-	DQ572566	51336	yes
FALSE	1513	8	34440191	8	34447939	8	34297709	8	34305457	8531	393566	405223	insertion	1	-1	homozygous	1	502	3909	33.8	not_applicable	-	DQ572566	51336	yes
FALSE	1516	8	40818133	8	40831119	8	40675652	8	40688638	24711	2.94593e+06	2960494	insertion	1	-1	homozygous	1	503	1577	47	not_applicable	ZMAT4	DQ578550	183064	yes
FALSE	1517	8	42330947	8	42349908	8	42188465	8	42207426	24711	1.42913e+06	1.44443e+06	deletion	1	-1	homozygous	1	504	3665	68.2	not_applicable	IKBKB;POLB	DKK4	24160	yes
FALSE	1518	8	43234107	8	43253844	8	43089250	8	43108987	24711	519205	544048	insertion	1	-1	homozygous	1	505	5106	61.6	not_applicable	-	HGSNAT	31281	yes
FALSE	1520	8	40818133	8	40831119	8	40675652	8	40688638	24712	2.94119e+06	2.95575e+06	insertion	1	-1	homozygous	1	503	1577	47	not_applicable	ZMAT4	DQ578550	183064	yes
FALSE	1521	8	40912672	8	4.09249e+07	8	40770191	8	40782409	24712	2.85308e+06	2.85993e+06	deletion	1	-1	heterozygous	1	-1	5365	41.7	not_applicable	-	ZMAT4	14849	yes
FALSE	1522	8	42330947	8	42349908	8	42188465	8	42207426	24712	1.42913e+06	1.44443e+06	deletion	1	-1	homozygous	1	504	3665	68.2	not_applicable	IKBKB;POLB	DKK4	24160	yes
FALSE	1523	8	43234107	8	43253844	8	43089250	8	43108987	24712	519205	544048	insertion	1	-1	homozygous	1	505	5106	61.6	not_applicable	-	HGSNAT	31281	yes
FALSE	1525	8	49711307	8	49714946	8	50623867	8	50627506	25701	1.44197e+06	1.44855e+06	insertion	1	-1	homozygous	1	506	2943	69.5	not_applicable	-	DQ572566	38512	yes
FALSE	1526	8	49711307	8	49714946	8	50623867	8	50627506	25702	1.43464e+06	1.44122e+06	insertion	1	-1	homozygous	1	506	2944	69.5	not_applicable	-	DQ572566	38512	yes
FALSE	1527	8	5.01111e+07	8	50125040	8	51023662	8	51037600	25702	1.03248e+06	1.03989e+06	deletion	1	-1	heterozygous	1	-1	6536	19.9	not_applicable	SNTG1	DQ582449	95199.5	yes
FALSE	1528	8	51781505	8	51792102	8	52694065	8	52704662	5681	529868	542923	insertion	1	-1	heterozygous	1	507	2458	52.3	not_applicable	PXDNL	DQ578736	8815	yes
FALSE	1529	8	51781505	8	51807317	8	52694065	8	52719877	5682	514618	542923	insertion	1	-1	heterozygous	2	507	2493	52.3	not_applicable	PXDNL;DQ578736	PCMTD1	10258	yes
FALSE	1530	8	53589058	8	53595052	8	54501618	8	54507612	2301	1.26084e+06	1.26805e+06	insertion	1	-1	homozygous	1	508	1218	94.7	not_applicable	-	AK056897	65128	yes
FALSE	1531	8	53589058	8	53595052	8	54501618	8	54507612	2302	1.26084e+06	1.26805e+06	insertion	1	-1	homozygous	1	508	1218	94.7	not_applicable	-	AK056897	65128	yes
FALSE	1532	8	55737170	8	55743763	8	56649729	8	56656322	24131	283967	291710	insertion	1	-1	homozygous	1	509	1150	69.5	not_applicable	TMEM68	TGS1	29469	yes
FALSE	1533	8	57067558	8	57077027	8	57980117	8	57989586	24131	1612343	1627507	insertion	1	-1	homozygous	1	510	5695	93.4	not_applicable	DQ588911	DQ573289	45732	yes
FALSE	1534	8	55737170	8	55743763	8	56649729	8	56656322	24132	283967	291710	insertion	1	-1	homozygous	1	509	1150	69.5	not_applicable	TMEM68	TGS1	29469	yes
FALSE	1535	8	57067558	8	57077027	8	57980117	8	57989586	24132	1612343	1627507	insertion	1	-1	homozygous	1	510	5695	93.4	not_applicable	DQ588911	DQ573289	45732	yes
FALSE	1537	8	61204185	8	61217404	8	62116744	8	62129963	681	921845	939431	insertion	1	-1	homozygous	1	511	4367	70.2	not_applicable	-	DQ587130	67611	yes
FALSE	1538	8	61204185	8	61217404	8	62116744	8	62129963	682	921845	939431	insertion	1	-1	homozygous	1	511	4367	70.2	not_applicable	-	DQ587130	67611	yes
FALSE	1539	8	63794845	8	6.38015e+07	8	64707402	8	64714072	6752	453623	457728	deletion	1	-1	heterozygous	1	-1	2564	29.8	not_applicable	-	RP11-579E24.1	9349	yes
FALSE	1540	8	68901173	8	6.8917e+07	8	69813408	8	69829241	2061	1.96998e+06	1.98794e+06	insertion	1	-1	homozygous	1	512	2135	78.1	not_applicable	RP11-600K15.1	C8orf34	82151	yes
FALSE	1541	8	68901173	8	68917699	8	69813408	8	69829934	2062	1.96998e+06	1.98794e+06	insertion	1	-1	homozygous	1	512	1441	79.5	not_applicable	RP11-600K15.1	C8orf34	82151	yes
FALSE	1542	8	71483961	8	71490782	8	72396196	8	72403017	561	2.43458e+06	2.44732e+06	insertion	1	-1	homozygous	1	513	5916	46.4	not_applicable	BC048982	L13714	2960	yes
FALSE	1543	8	71483961	8	71490782	8	72396196	8	72403017	562	2.43458e+06	2.44732e+06	insertion	1	-1	homozygous	1	513	5916	46.4	not_applicable	BC048982	L13714	2960	yes
FALSE	1544	8	72872702	8	72890493	8	73784937	8	73802728	24761	564964	576758	deletion	1	-1	heterozygous	1	-1	5997	80.8	not_applicable	KCNB2	AX746793	29061	yes
FALSE	1545	8	76424199	8	76427720	8	77336434	8	77339955	24761	4.09896e+06	4101368	deletion	0.98	-1	homozygous	1	514	1115	49.7	not_applicable	LINC01111	DQ571358	19692	yes
FALSE	1546	8	74449320	8	74458914	8	75361555	8	75371149	24762	2.13992e+06	2.14555e+06	deletion	1	-1	heterozygous	1	-1	3962	60.3	not_applicable	-	JA611241	72533	yes
FALSE	1548	8	76424199	8	76427720	8	77336434	8	77339955	24762	4.10116e+06	4.10357e+06	deletion	0.98	-1	homozygous	1	514	1115	49.7	not_applicable	LINC01111	DQ571358	19692	yes
FALSE	1552	8	87256475	8	87266782	8	88268703	8	88279010	1931	2.04318e+06	2.05601e+06	insertion	1	-1	heterozygous	1	-1	2517	15.2	not_applicable	CNBD1	U02063	183914	yes
FALSE	1553	8	86172964	8	86208461	8	87185193	8	87220690	1932	842308	872361	deletion	1	-1	heterozygous	1	-1	5445	7.9	not_applicable	-	SLC7A13	5598	yes
FALSE	1555	8	95849365	8	95870168	8	96861593	8	96882396	832	627001	643359	deletion	1	-1	heterozygous	1	-1	4445	21.9	not_applicable	-	LOC100616530	39223	yes
FALSE	1557	8	100412060	8	1.00429e+08	8	101424288	8	101441244	4902	238991	257516	insertion	1	-1	homozygous	1	515	1569	76.8	not_applicable	-	MIR4471	29216	yes
FALSE	1559	8	100412060	8	1.00429e+08	8	101424288	8	101441244	4901	198998	217522	insertion	1	-1	homozygous	1	515	1569	76.8	not_applicable	-	MIR4471	29216	yes
FALSE	1560	8	102538489	8	102553854	8	103550717	8	103566082	1311	1.24882e+06	1.26662e+06	insertion	1	-1	homozygous	1	516	2436	58.9	not_applicable	ODF1	DQ596939	53140	yes
FALSE	1561	8	102538489	8	102553854	8	103550717	8	103566082	1312	1.24882e+06	1.26662e+06	insertion	1	-1	homozygous	1	516	2436	58.9	not_applicable	ODF1	DQ596939	53140	yes
FALSE	1567	8	111280523	8	111312846	8	112292752	8	112325075	27671	599649	628838	deletion	1	-1	homozygous	1	518	3134	25.2	not_applicable	-	DQ593458	111209	yes
FALSE	1570	8	111280523	8	111312846	8	112292752	8	112325075	27672	599649	628838	deletion	1	-1	homozygous	1	518	3134	25.2	not_applicable	-	DQ593458	111209	yes
FALSE	1571	8	116747678	8	116754692	8	117759917	8	117766931	24251	486310	494827	insertion	1	-1	homozygous	1	519	1504	78.1	not_applicable	EIF3H	UTP23	11811	yes
FALSE	1572	8	116747678	8	116754692	8	117759917	8	117766931	24252	486310	494827	insertion	1	-1	homozygous	1	519	1504	78.1	not_applicable	EIF3H	UTP23	11811	yes
FALSE	1573	8	117598784	8	117612161	8	118611023	8	118624400	2032	1.12878e+06	1.14643e+06	insertion	1	-1	heterozygous	1	-1	4269	9.9	not_applicable	-	MED30	58523	yes
FALSE	1574	8	119491580	8	119507897	8	120503820	8	120520137	3002	705105	722991	insertion	1	-1	heterozygous	1	-1	1569	41.1	not_applicable	-	ENPP2	49180	yes
FALSE	1576	8	120915514	8	120921083	8	121927754	8	121933323	2051	645714	656598	insertion	1	-1	heterozygous	1	520	5314	37.7	not_applicable	-	SNTB1	103446	yes
FALSE	1577	8	120915514	8	120921083	8	121927754	8	121933323	2052	645714	653883	insertion	1	-1	heterozygous	2	520	2600	42.4	not_applicable	-	SNTB1	103446	yes
FALSE	1578	8	123169122	8	123179105	8	124181362	8	124191345	11731	27063.2	38564.8	insertion	1	-1	heterozygous	1	-1	1518	10.6	not_applicable	-	U3	1205	yes
FALSE	1579	8	125571737	8	1.2559e+08	8	126583981	8	126602382	1281	811214	823988	deletion	1	-1	homozygous	1	521	5626	92.7	not_applicable	-	Mir_544	14541	yes
FALSE	1580	8	125571737	8	1.2559e+08	8	126583981	8	126602382	1282	811214	823988	deletion	1	-1	homozygous	1	521	5626	92.7	not_applicable	-	Mir_544	14541	yes
FALSE	1581	8	127612651	8	127614850	8	128624896	8	128627095	391	1.51874e+06	1.52444e+06	insertion	1	-1	heterozygous	1	-1	3495	6	not_applicable	-	BC042052	71493	yes
FALSE	1582	8	128451053	8	128462496	8	129463299	8	129474742	391	674400	679806	deletion	1	-1	homozygous	1	522	6037	95.4	not_applicable	-	BC009730	23138	yes
FALSE	1583	8	128451053	8	128462496	8	129463299	8	129474742	392	674219	679625	deletion	1	-1	homozygous	1	522	6038	95.4	not_applicable	-	BC009730	23138	yes
FALSE	1585	8	131263769	8	1.31273e+08	8	132276016	8	132285276	861	719142	726181	deletion	1	-1	homozygous	1	523	2220	62.3	not_applicable	-	DQ587876	84485.5	yes
FALSE	1586	8	131263769	8	1.31273e+08	8	132276016	8	132285276	862	719142	726181	deletion	1	-1	homozygous	1	523	2220	62.3	not_applicable	-	DQ587876	84485.5	yes
FALSE	1587	8	132903311	8	132911140	8	133915556	8	133923385	19572	23510.2	32972.7	insertion	1	-1	heterozygous	1	-1	1633	20.5	not_applicable	TG	PHF20L1	54505	yes
FALSE	1588	8	134061472	8	134078717	8	135073715	8	135090960	511	1.04117e+06	1.05221e+06	deletion	1	-1	homozygous	1	524	6205	54.3	not_applicable	-	DQ580215	133600	yes
FALSE	1589	8	134061472	8	134078717	8	135073715	8	135090960	512	1.04117e+06	1.05221e+06	deletion	1	-1	homozygous	1	524	6205	54.3	not_applicable	-	DQ580215	133600	yes
FALSE	1591	8	136022807	8	136043299	8	137035050	8	137055542	26511	400804	423238	insertion	1	-1	homozygous	1	525	1941	94.7	not_applicable	-	DQ594820	92411	yes
FALSE	1593	8	136022807	8	136043299	8	137035050	8	137055542	26512	342740	365174	insertion	1	-1	homozygous	1	525	1941	94.7	not_applicable	-	DQ594820	92411	yes
FALSE	1594	8	138201631	8	138215285	8	139213874	8	139227528	3581	7863.5	23058.9	insertion	1	-1	homozygous	1	526	1541	93.4	not_applicable	FAM135B	DQ596630	116909	yes
FALSE	1596	8	138201631	8	138215285	8	139213874	8	139227528	3582	7863.5	23058.9	insertion	1	-1	homozygous	1	526	1541	93.4	not_applicable	FAM135B	DQ596630	116909	yes
FALSE	1597	8	141414607	8	141424738	8	142424707	8	142434838	27332	34370.6	50647.9	insertion	1	-1	homozygous	1	527	6146	96.7	not_applicable	PTP4A3	MROH5	9091	yes
FALSE	1598	8	140589322	8	140591535	8	141599421	8	141601634	27331	903618	912840	insertion	1	-1	heterozygous	1	-1	7010	0	not_applicable	AGO2	HW340013	43601	yes
FALSE	1599	8	141414607	8	141424738	8	142424707	8	142434838	27331	63170.1	79447.3	insertion	1	-1	homozygous	1	527	6146	96.7	not_applicable	PTP4A3	MROH5	9091	yes
FALSE	1600	8	141630340	8	141638024	8	142640440	8	142648124	3091	762542	773626	insertion	1	-1	heterozygous	1	-1	3400	24.5	not_applicable	-	MROH5	123111	yes
FALSE	1601	8	141653243	8	141658898	8	142663343	8	142668998	3091	740704	747430	insertion	1	-1	homozygous	1	528	1070	54.3	not_applicable	-	MIR1302-7	127344	yes
FALSE	1602	8	141772332	8	141779870	8	142853693	8	142861231	3091	613501	625328	insertion	1	-1	homozygous	1	529	4289	98.7	not_applicable	-	MIR1302-7	6372	yes
FALSE	1603	8	141653243	8	141658898	8	142663343	8	142668998	3092	740704	747430	insertion	1	-1	homozygous	1	528	1070	54.3	not_applicable	-	MIR1302-7	127344	yes
FALSE	1604	8	141772332	8	141779870	8	142853693	8	142861231	3092	613501	625328	insertion	1	-1	homozygous	1	529	4289	98.7	not_applicable	-	MIR1302-7	6372	yes
FALSE	1605	8	142425159	8	142433259	8	143506520	8	143514620	4081	27747.6	37645.3	insertion	1	-1	homozygous	1	530	1798	80.1	not_applicable	-	TSNARE1	21978	yes
FALSE	1608	8	142425159	8	142433259	8	143506520	8	143514620	4082	27747.6	37645.3	insertion	1	-1	homozygous	1	530	1798	80.1	not_applicable	-	TSNARE1	21978	yes
FALSE	1610	8	143068835	8	143096942	8	144150252	8	144178359	4082	678382	714736	insertion	1	-1	heterozygous	1	-1	8247	19.2	not_applicable	-	C8orf31	14533	yes
FALSE	1611	8	143238181	8	143250012	8	144320351	8	144332182	2861	113422	126812	insertion	1	-1	homozygous	1	532	1559	41.7	not_applicable	ZFP41	GLI4	17425	yes
FALSE	1612	8	1.43397e+08	8	143412874	8	144478817	8	144495044	2861	274922	293067	insertion	1	-1	homozygous	1	533	1917	95.4	not_applicable	-	RHPN1	12427.5	yes
FALSE	1613	8	143610534	8	143688989	8	144692704	8	144771159	2861	492111	563499	deletion	1	-1	heterozygous	1	534	7067	25.2	not_applicable	TSTA3;ZNF623;DQ571350;ZNF707	PYCRL	921	yes
FALSE	1614	8	143238181	8	143250012	8	144320351	8	144332182	2862	113422	126812	insertion	1	-1	homozygous	1	532	1559	41.7	not_applicable	ZFP41	GLI4	17425	yes
FALSE	1615	8	1.43397e+08	8	143412874	8	144478817	8	144495044	2862	274922	293067	insertion	1	-1	homozygous	1	533	1917	95.4	not_applicable	-	RHPN1	12427.5	yes
FALSE	1616	8	143664162	8	143670279	8	144746332	8	144752449	2862	546720	559041	insertion	1	-1	heterozygous	2	534	6204	48.3	not_applicable	-	ZNF623	10433	yes
FALSE	1617	8	143856843	8	1.43872e+08	8	144939016	8	144946200	2862	747141	759363	deletion	1	-1	heterozygous	1	-1	2966	7.9	not_applicable	EPPK1	DQ571320	6378	yes
FALSE	1619	8	144115589	8	144128984	8	145170492	8	145183887	7161	399118	419055	insertion	1	-1	homozygous	1	535	6543	84.1	not_applicable	KIAA1875	KIAA1875	4104	yes
FALSE	1621	8	1.4438e+08	8	144391178	8	145603486	8	145616378	7161	132162	144948	insertion	1	-1	homozygous	1	537	1404	96.7	not_applicable	ADCK5	CPSF1	2053	yes
FALSE	1622	8	144115589	8	144128984	8	145170492	8	145183887	7162	399118	419055	insertion	1	-1	homozygous	1	535	6543	84.1	not_applicable	KIAA1875	KIAA1875	4104	yes
FALSE	1624	8	1.4438e+08	8	144391178	8	145603486	8	145616378	7162	132162	144948	insertion	1	-1	homozygous	1	537	1404	96.7	not_applicable	ADCK5	CPSF1	2053	yes
FALSE	1625	8	1.45013e+08	8	145043467	8	146238016	8	146268853	23391	35092.5	68808.3	insertion	0.99	-1	heterozygous	1	-1	2878	18.5	not_applicable	-	ZNF252P-AS1	6584.5	yes
FALSE	1626	9	318764	9	328799	9	318764	9	328799	25281	301760	313285	insertion	1	-1	homozygous	1	538	1489	39.7	not_applicable	DOCK8	C9orf66	102872	yes
FALSE	1628	9	318764	9	328799	9	318764	9	328799	25282	301760	313285	insertion	1	-1	homozygous	1	538	1489	39.7	not_applicable	DOCK8	C9orf66	102872	yes
FALSE	1630	9	6378312	9	6405678	9	6378312	9	6405678	8211	344767	376014	insertion	1	-1	homozygous	1	539	3882	91.4	not_applicable	-	UHRF2	7473	yes
FALSE	1631	9	6378312	9	6405678	9	6378312	9	6405678	8212	346691	377938	insertion	1	-1	homozygous	1	539	3882	91.4	not_applicable	-	UHRF2	7473	yes
FALSE	1636	9	15807624	9	15828409	9	15807622	9	15828407	9311	388424	402758	deletion	1	-1	heterozygous	1	-1	6451	36.4	not_applicable	CCDC171	RNU6-14P	31339	yes
FALSE	1637	9	18885229	9	18888220	9	18885227	9	18888218	621	223008	227122	insertion	1	-1	heterozygous	1	-1	1123	17.2	not_applicable	ADAMTSL1	JC172250	5203	yes
FALSE	1638	9	17903677	9	17930194	9	17903675	9	17930192	622	1.17976e+06	1.20286e+06	deletion	1	-1	heterozygous	1	-1	3425	68.9	not_applicable	-	SH3GL2	106554	yes
FALSE	1639	9	19668240	9	1.96762e+07	9	19668238	9	19676246	7111	344437	353558	insertion	1	-1	heterozygous	1	-1	1113	43.7	not_applicable	SLC24A2	DQ580215	204138	yes
FALSE	1640	9	24970316	9	25000443	9	24970314	9	25000441	27501	343370	377885	insertion	1	-1	homozygous	1	542	4389	78.1	not_applicable	-	U02063	191857	yes
FALSE	1641	9	24970316	9	25000443	9	24970314	9	25000441	27502	343370	377885	insertion	1	-1	homozygous	1	542	4389	78.1	not_applicable	-	U02063	191857	yes
FALSE	1642	9	29077056	9	29107883	9	29077054	9	29107881	25632	353173	378510	deletion	1	-1	heterozygous	1	-1	5490	20.5	not_applicable	LINGO2	DQ578550	80350	yes
FALSE	1643	9	33126891	9	33137532	9	33126889	9	33137530	222	974618	987513	insertion	1	-1	heterozygous	1	-1	2253	42.4	not_applicable	B4GALT1	B4GALT1-AS1	29416	yes
FALSE	1648	9	40917834	9	40926313	9	68991063	9	68999542	28231	1.76178e+06	1.76905e+06	deletion	0.99	-1	heterozygous	1	-1	1211	68.9	not_applicable	-	MIR1299	2697	yes
FALSE	1660	9	69102762	9	69144850	9	71717678	9	71759766	281	2.89117e+06	2.92761e+06	deletion	1	-1	heterozygous	1	-1	5648	58.3	not_applicable	-	AK096834	20469	yes
FALSE	1661	9	70235668	9	70236438	9	72850584	9	72851354	281	1.79684e+06	1.80145e+06	insertion	1	-1	heterozygous	1	-1	3847	16.6	not_applicable	SMC5-AS1;SMC5-AS1	MAMDC2	8697	yes
FALSE	1665	9	74277869	9	74289373	9	76892785	9	76904289	3171	1.16099e+06	1.17409e+06	insertion	1	-1	homozygous	1	549	1605	80.1	not_applicable	-	DQ586562	59766	yes
FALSE	1666	9	74277869	9	74289373	9	76892785	9	76904289	3172	1.16099e+06	1.17409e+06	insertion	1	-1	homozygous	1	549	1605	80.1	not_applicable	-	DQ586562	59766	yes
FALSE	1667	9	76302168	9	76318108	9	78917084	9	78933024	17171	4210	18065.5	deletion	0.99	-1	homozygous	1	550	2085	62.9	not_applicable	PCSK5	DQ578279	1866	yes
FALSE	1668	9	76302168	9	76318108	9	78917084	9	78933024	17172	4210	18065.5	deletion	0.99	-1	homozygous	1	550	2085	62.9	not_applicable	PCSK5	DQ578279	1866	yes
FALSE	1669	9	76939547	9	76944232	9	79554463	9	79559148	22482	453393	455740	deletion	1	-1	heterozygous	1	-1	2338	7.3	not_applicable	-	DQ580663	10687	yes
TRUE	1670	9	76725970	9	84341474	9	79340886	9	86956389	29021	1.80053e+06	1.60613e+06	translocation_intrachr	0	-1	heterozygous	1	551	-1	0	pass	PRUNE2	SLC28A3	696	yes
TRUE	1671	9	76578991	12	70482277	9	79193907	12	70876057	29021	1.94714e+06	1.96984e+06	translocation_interchr	0	-1	heterozygous	1	552	-1	0	pass	BC031864	PRUNE2	32385	yes
TRUE	1672	9	76725970	9	84341474	9	79340886	9	86956389	29022	1.80053e+06	1.60613e+06	translocation_intrachr	0	-1	heterozygous	1	551	-1	0	pass	PRUNE2	SLC28A3	696	yes
TRUE	1673	9	76578991	12	70505031	9	79193907	12	70898811	29022	1.94714e+06	1.94714e+06	translocation_interchr	0	-1	heterozygous	1	552	-1	0	pass	BC031864	PTPRB	11820	yes
TRUE	1674	9	76862539	12	83581219	9	79477455	12	83974998	23121	1.27181e+06	1.27181e+06	translocation_interchr	0	-1	heterozygous	1	553	-1	0	pass	PRUNE2	L13714	67287	yes
TRUE	1675	9	76862539	12	83581219	9	79477455	12	83974998	57142	1.27181e+06	1.27181e+06	translocation_interchr	0.08	-1	heterozygous	1	553	-1	0	pass	PRUNE2	L13714	67287	yes
TRUE	1676	9	80092692	12	69085130	9	82707607	12	69478910	24981	937446	837561	translocation_interchr	0	-1	unknown	-1	397	-1	0	pass	-	DQ585951	92355	yes
TRUE	1677	9	80092692	12	69085130	9	82707607	12	69478910	24982	937446	837561	translocation_interchr	0	-1	unknown	-1	397	-1	0	pass	-	DQ585951	92355	yes
TRUE	1678	9	79969217	12	84350003	9	82584132	12	84743782	24061	143347	364035	translocation_interchr	0	-1	heterozygous	1	554	-1	0	pass	-	DQ588531	99090	yes
TRUE	1679	9	79969217	12	84350003	9	82584132	12	84743782	24062	388329	609018	translocation_interchr	0	-1	heterozygous	1	554	-1	0	pass	-	DQ588531	99090	yes
FALSE	1680	9	81428307	9	81432037	9	84043222	9	84046952	371	1.57891e+06	1.58462e+06	insertion	1	-1	heterozygous	1	-1	1982	13.2	not_applicable	-	TLE1	151646	yes
FALSE	1681	9	81703149	9	81717859	9	84318064	9	84332774	371	1.29533e+06	1.3076e+06	deletion	1	-1	homozygous	1	555	2434	84.1	not_applicable	RP11-154D17.1;DQ580663;DQ588547;DQ586320	TLE1	14469	yes
FALSE	1682	9	80642698	9	8.06582e+07	9	83257613	9	83273132	372	2.34994e+06	2.36344e+06	deletion	1	-1	heterozygous	1	-1	2017	31.8	not_applicable	-	DQ571825	65033	yes
FALSE	1683	9	81703149	9	81717859	9	84318064	9	84332774	372	1.29533e+06	1.3076e+06	deletion	1	-1	homozygous	1	555	2434	84.1	not_applicable	RP11-154D17.1;DQ580663;DQ588547;DQ586320	TLE1	14469	yes
TRUE	1686	9	84615890	12	92756462	9	87230805	12	93150238	24822	136364	199362	translocation_interchr	0	-1	heterozygous	1	-1	-1	0	pass	PLEKHG7	EEA1	16047	yes
FALSE	1687	9	8.65657e+07	9	86589582	9	89180578	9	89204497	2991	535735	561827	insertion	0.99	-1	heterozygous	1	-1	2172	23.2	not_applicable	-	ZCCHC6	211176	yes
FALSE	1689	9	88656524	9	88664534	9	91271439	9	91279449	25901	702822	716856	insertion	1	-1	homozygous	1	557	6025	96	not_applicable	-	RP13-60M5.2	4365	yes
FALSE	1691	9	88656524	9	88664534	9	91271439	9	91279449	25902	702822	716856	insertion	1	-1	homozygous	1	557	6025	96	not_applicable	-	RP13-60M5.2	4365	yes
FALSE	1693	9	93730936	9	93752120	9	96493218	9	96514402	25221	1.09287e+06	1.11129e+06	deletion	1	-1	heterozygous	1	-1	2767	35.1	not_applicable	-	DQ587876	3597	yes
FALSE	1694	9	95186454	9	95190341	9	97948736	9	97952623	431	340424	343287	deletion	0.99	-1	homozygous	1	558	1023	0	not_applicable	FANCC	JC172092	31256	yes
FALSE	1695	9	95186454	9	95190341	9	97948736	9	97952623	432	340424	343287	deletion	0.99	-1	homozygous	1	558	1023	0	not_applicable	FANCC	JC172092	31256	yes
FALSE	1696	9	98533330	9	98564389	9	101295612	9	101326671	1191	446054	474763	deletion	1	-1	homozygous	1	559	2350	27.2	not_applicable	GABBR2	ANKS6	167620	yes
FALSE	1697	9	98594658	9	98597770	9	101356940	9	101360052	1191	411616	415791	insertion	1	-1	heterozygous	1	-1	1063	34.4	not_applicable	GABBR2	ANKS6	134239	yes
FALSE	1698	9	98533330	9	98564389	9	101295612	9	101326671	1192	445006	473715	deletion	1	-1	homozygous	1	559	2349	27.2	not_applicable	GABBR2	ANKS6	167620	yes
FALSE	1700	9	101492869	9	1.01501e+08	9	104255151	9	104263159	161	4.24972e+06	4.25973e+06	insertion	1	-1	homozygous	1	-1	2009	34.4	not_applicable	-	TMEM246	5677	yes
FALSE	1701	9	107253692	9	107273834	9	110015973	9	110036115	1301	778494	796490	deletion	0.99	-1	homozygous	1	560	2146	67.5	not_applicable	DQ578550;DQ588547;DQ598327;DQ586451	RAD23B	9402	yes
FALSE	1703	9	1.0777e+08	9	107778739	9	110532514	9	110541020	1301	275985	281414	deletion	1	-1	homozygous	1	562	3079	88.7	not_applicable	DQ580663;DQ588547	JC172208	16379.5	yes
FALSE	1704	9	107253692	9	107273834	9	110015973	9	110036115	1302	778494	796490	deletion	0.99	-1	homozygous	1	560	2146	67.5	not_applicable	DQ578550;DQ588547;DQ598327;DQ586451	RAD23B	9402	yes
FALSE	1706	9	1.0777e+08	9	107778739	9	110532514	9	110541020	1302	275985	281414	deletion	1	-1	homozygous	1	562	3079	88.7	not_applicable	DQ580663;DQ588547	JC172208	16379.5	yes
FALSE	1707	9	110688181	9	110698195	9	113450461	9	113460475	142	1.86109e+06	1.87249e+06	insertion	1	-1	homozygous	1	563	1392	36.4	not_applicable	MUSK	DQ571825	24895	yes
FALSE	1708	9	109648667	9	1.09654e+08	9	112410947	9	112416496	141	2.90838e+06	2.91672e+06	insertion	1	-1	heterozygous	1	-1	2788	5.3	not_applicable	-	Mir_548	6149	yes
FALSE	1709	9	110688181	9	110698195	9	113450461	9	113460475	141	1.86234e+06	1.87375e+06	insertion	1	-1	homozygous	1	563	1392	36.4	not_applicable	MUSK	DQ571825	24895	yes
FALSE	1715	9	118629287	9	118652059	9	121391565	9	121414337	29711	4.17615e+06	4.2033e+06	insertion	1	-1	heterozygous	1	-1	4380	26.5	not_applicable	-	L13714	15520	yes
FALSE	1718	9	125803975	9	125816295	9	128566254	9	128578574	1331	343413	360738	insertion	1	-1	homozygous	1	565	5005	87.4	not_applicable	PBX3	DQ596393	22930	yes
FALSE	1719	9	125803975	9	125816295	9	128566254	9	128578574	1332	343413	360738	insertion	1	-1	homozygous	1	565	5005	87.4	not_applicable	PBX3	DQ596393	22930	yes
FALSE	1721	9	126870511	9	126886192	9	129632790	9	129648471	3332	120469	138620	insertion	1	-1	heterozygous	1	-1	2470	23.8	not_applicable	ZBTB34	RALGPS1	28582	yes
FALSE	1725	9	130956712	9	1.30961e+08	9	133832099	9	133836328	13971	297358	304127	insertion	1	-1	homozygous	1	568	2540	87.4	not_applicable	-	FIBCD1	17861	yes
FALSE	1726	9	130956712	9	1.30961e+08	9	133832099	9	133836328	13972	297358	304127	insertion	1	-1	homozygous	1	568	2540	87.4	not_applicable	-	FIBCD1	17861	yes
FALSE	1727	9	131406288	9	131416081	9	134281675	9	134291468	6620	424853	438149	insertion	1	-1	homozygous	1	-1	3503	70.2	not_applicable	-	PRRC2B	14009	yes
FALSE	1728	9	132520857	9	1.3254e+08	9	135396244	9	135414995	4292	543523	559041	deletion	1	-1	heterozygous	1	-1	3231	4	not_applicable	C9orf171	BARHL1	42998.5	yes
FALSE	1729	9	133580014	9	133598224	9	136445136	9	136463346	1561	206467	226808	insertion	1	-1	homozygous	1	569	2131	95.4	not_applicable	FAM163B	ADAMTSL2	4496	yes
FALSE	1732	9	133580014	9	133600641	9	136445136	9	136465763	1562	205816	228375	insertion	1	-1	homozygous	1	569	1932	95.4	not_applicable	FAM163B	ADAMTSL2	4496	yes
FALSE	1734	9	134651921	9	134661790	9	137543767	9	137553636	30781	74211.2	85612.5	insertion	1	-1	homozygous	1	571	1532	70.2	not_applicable	COL5A1	LOC101448202	157625	yes
FALSE	1735	9	134681870	9	134688263	9	137573716	9	137580109	30781	105497	113213	insertion	1	-1	heterozygous	1	572	1324	69.5	not_applicable	COL5A1	LOC101448202	131152	yes
FALSE	1736	9	134711526	9	134738268	9	137603372	9	137630114	30781	136228	165500	insertion	0.99	-1	homozygous	1	573	2530	91.4	not_applicable	COL5A1	LOC101448202	81147	yes
FALSE	1737	9	134651921	9	134661790	9	137543767	9	137553636	30782	74211.2	85612.5	insertion	1	-1	homozygous	1	571	1532	70.2	not_applicable	COL5A1	LOC101448202	157625	yes
FALSE	1738	9	134681870	9	134690785	9	137573716	9	137582631	30782	105497	115661	insertion	1	-1	heterozygous	2	572	1250	62.9	not_applicable	COL5A1	LOC101448202	128630	yes
FALSE	1739	9	134711526	9	134738268	9	137603372	9	137630114	30782	136228	165500	insertion	0.99	-1	homozygous	1	573	2530	91.4	not_applicable	COL5A1	LOC101448202	81147	yes
FALSE	1742	9	137324936	9	137333089	9	140219388	9	140227541	2541	169078	183937	insertion	1	-1	homozygous	1	574	6706	76.2	not_applicable	EXD3	NRARP	22686	yes
FALSE	1744	9	137097878	9	137108501	9	139992330	9	140002953	2542	402387	415503	insertion	1	-1	heterozygous	1	-1	2494	82.8	not_applicable	MAN1B1	DPP7	2039	yes
FALSE	1745	9	137324936	9	137333089	9	140219388	9	140227541	2542	169078	183937	insertion	1	-1	homozygous	1	574	6706	76.2	not_applicable	EXD3	NRARP	22686	yes
FALSE	1748	9	137564223	9	137574838	9	140458675	9	140469290	23361	100450	109514	deletion	0.99	-1	heterozygous	1	-1	1551	66.9	not_applicable	DPH7	ZMYND19	7241	yes
FALSE	1751	10	474817	10	488341	10	520757	10	534281	1041	2.31502e+06	2.33081e+06	insertion	1	-1	homozygous	1	576	2264	76.2	not_applicable	DIP2C;DIP2C	MIR5699	153348	yes
FALSE	1752	10	515367	10	533626	10	561307	10	579566	1041	2.26813e+06	2.28828e+06	insertion	1	-1	homozygous	1	577	1898	35.1	not_applicable	DIP2C	DIP2C	30204	yes
FALSE	1753	10	742831	10	772002	10	788771	10	817942	1041	2.02595e+06	2.05783e+06	insertion	0.99	-1	heterozygous	1	-1	2713	7.3	not_applicable	-	LARP4B	34912	yes
FALSE	1757	10	474817	10	488341	10	520757	10	534281	1042	2.31198e+06	2.32776e+06	insertion	1	-1	homozygous	1	576	2264	76.2	not_applicable	DIP2C;DIP2C	MIR5699	153348	yes
FALSE	1758	10	515367	10	533626	10	561307	10	579566	1042	2.26508e+06	2.28524e+06	insertion	1	-1	homozygous	1	577	1898	35.1	not_applicable	DIP2C	DIP2C	30204	yes
FALSE	1763	10	3038919	10	3042806	10	3081111	10	3084998	12181	32476.4	39650.6	insertion	1	-1	homozygous	1	579	3287	23.2	not_applicable	-	PFKP	24714	yes
FALSE	1764	10	3038919	10	3042806	10	3081111	10	3084998	12182	32476.4	39650.6	insertion	1	-1	homozygous	1	579	3287	23.2	not_applicable	-	PFKP	24714	yes
FALSE	1765	10	4240756	10	4.24816e+06	10	4282948	10	4290350	7232	101285	107452	deletion	0.99	-1	homozygous	1	580	1233	66.2	not_applicable	LINC00702	DQ576987	91521	yes
FALSE	1767	10	4240756	10	4.24816e+06	10	4282948	10	4290350	7231	101285	107452	deletion	0.99	-1	homozygous	1	580	1233	66.2	not_applicable	LINC00702	DQ576987	91521	yes
FALSE	1769	10	5844539	10	5855658	10	5886502	10	5897621	11172	566737	574659	deletion	1	-1	heterozygous	1	-1	3196	41.1	not_applicable	TRNA_Val	ANKRD16	6068	yes
FALSE	1770	10	6351225	10	6382666	10	6393187	10	6424628	25061	454840	480259	deletion	1	-1	homozygous	1	582	6021	80.8	not_applicable	-	LOC399715	15251	yes
FALSE	1771	10	6351225	10	6382666	10	6393187	10	6424628	25062	454840	480259	deletion	1	-1	homozygous	1	582	6021	80.8	not_applicable	-	LOC399715	15251	yes
TRUE	1772	10	8348914	13	88792572	10	8390877	13	89444826	29021	350261	390222	translocation_interchr	0	-1	heterozygous	1	583	-1	0	pass	-	LINC00708	80610	yes
TRUE	1773	10	8348914	13	88792572	10	8390877	13	89444826	29022	350261	390222	translocation_interchr	0	-1	heterozygous	1	583	-1	0	pass	-	LINC00708	80610	yes
FALSE	1774	10	8805802	10	8808035	10	8847765	10	8849998	24671	424690	432991	insertion	1	-1	heterozygous	1	584	6068	17.9	not_applicable	-	DQ588544	60773	yes
TRUE	1776	10	8723656	21	26860734	10	8765619	21	28233053	22721	2.79091e+06	2.84102e+06	translocation_interchr	0	-1	unknown	-1	585	-1	0	pass	-	ADAMTS1	15326	yes
TRUE	1778	10	8723656	21	26860734	10	8765619	21	28233053	22722	2.79091e+06	2.84102e+06	translocation_interchr	0	-1	unknown	-1	585	-1	0	pass	-	ADAMTS1	15326	yes
TRUE	1779	10	8800657	10	8808035	10	8842620	10	8849998	23601	1.20781e+06	1221076	insertion	1	-1	heterozygous	2	584	5892	19.2	not_applicable	-	DQ588544	60773	yes
TRUE	1780	10	8866627	10	9400464	10	8908590	10	9442427	23601	1.27943e+06	1513482	deletion	0.97	-1	heterozygous	1	586	299789	0	not_applicable	DQ588544;DQ601422;DQ601422;DQ591044;U02063;DQ578550;LINC00709;DQ580213;JB742556;HV745913;HV745915;HV745902;HV745905;HV745899;HV745905	JC172208	220223	yes
TRUE	1781	10	8866627	12	70842933	10	8908590	12	71236713	23601	1.27943e+06	1.29474e+06	translocation_interchr	0.01	-1	heterozygous	1	587	-1	0	pass	PTPRR	DQ588544	2181	yes
TRUE	1782	10	8715331	15	91764121	10	8757294	15	92307351	23601	1.12201e+06	878267	translocation_interchr	0	-1	unknown	-1	585	-1	0	pass	-	TRNA_Pseudo	52978	yes
TRUE	1783	10	8805802	10	8808035	10	8847765	10	8849998	23602	1.17596e+06	1.18421e+06	insertion	1	-1	heterozygous	1	584	6010	17.9	not_applicable	-	DQ588544	60773	yes
TRUE	1784	10	8866627	10	9400464	10	8908590	10	9442427	23602	1.24256e+06	1.47661e+06	deletion	0.97	-1	heterozygous	1	586	299789	0	not_applicable	DQ588544;DQ601422;DQ601422;DQ591044;U02063;DQ578550;LINC00709;DQ580213;JB742556;HV745913;HV745915;HV745902;HV745905;HV745899;HV745905	JC172208	220223	yes
TRUE	1785	10	8866627	12	70842933	10	8908590	12	71236713	23602	1.24256e+06	1.25787e+06	translocation_interchr	0.01	-1	heterozygous	1	587	-1	0	pass	PTPRR	DQ588544	2181	yes
TRUE	1786	10	8715331	15	91764121	10	8757294	15	92307351	23602	1.08514e+06	841398	translocation_interchr	0	-1	unknown	-1	585	-1	0	pass	-	TRNA_Pseudo	52978	yes
FALSE	1787	10	8805802	10	8808035	10	8847765	10	8849998	31560	78064.3	86353.2	insertion	1	-1	heterozygous	1	584	6056	17.9	not_applicable	-	DQ588544	60773	yes
TRUE	1788	10	9400464	12	70651077	10	9442427	12	71044857	23601	1513482	1.48617e+06	translocation_interchr	0	-1	heterozygous	1	588	-1	0	pass	PTPRR	PTPRB	13638	yes
TRUE	1789	10	9400464	12	70651077	10	9442427	12	71044857	23602	1.47661e+06	1.4493e+06	translocation_interchr	0.02	-1	heterozygous	1	588	-1	0	pass	PTPRR	PTPRB	13638	yes
FALSE	1790	10	12499631	10	12521176	10	12541630	10	12563175	28342	1.72022e+06	1.73935e+06	deletion	1	-1	homozygous	1	589	2418	52.3	not_applicable	CAMK1D;DQ578550	DQ578550	1277	yes
FALSE	1792	10	12499631	10	12521176	10	12541630	10	12563175	28341	1.72189e+06	1.74102e+06	deletion	1	-1	homozygous	1	589	2418	52.3	not_applicable	CAMK1D;DQ578550	DQ578550	1277	yes
FALSE	1794	10	1.51903e+07	10	15210783	10	15232268	10	15252782	6161	529907	554331	insertion	1	-1	homozygous	1	591	3910	94	not_applicable	-	FAM171A1	862	yes
FALSE	1795	10	1.51903e+07	10	15210783	10	15232268	10	15252782	6162	529907	554331	insertion	1	-1	homozygous	1	591	3910	94	not_applicable	-	FAM171A1	862	yes
FALSE	1796	10	1.9706e+07	10	19711643	10	19994939	10	20000572	2741	1.58125e+06	1.58541e+06	deletion	0.98	-1	homozygous	1	592	1477	42.4	not_applicable	MALRD1;BC014575	TRNA_Pseudo	36036	yes
FALSE	1797	10	1.9706e+07	10	19711643	10	19994939	10	20000572	2742	1.58125e+06	1.58541e+06	deletion	0.98	-1	homozygous	1	592	1477	42.4	not_applicable	MALRD1;BC014575	TRNA_Pseudo	36036	yes
FALSE	1799	10	24084176	10	24091994	10	24373105	10	24380923	34171	224680	230878	deletion	0.98	-1	heterozygous	1	-1	1621	24.5	not_applicable	-	DQ580215	81227	yes
FALSE	1800	10	25385442	10	25450293	10	25674371	10	25739222	34171	1521942	1.59254e+06	insertion	1	-1	heterozygous	1	-1	5742	53	not_applicable	GPR158	LINC00836	201419	yes
FALSE	1809	10	35603726	10	35610862	10	35892654	10	35899790	2271	1.78242e+06	1791386	insertion	1	-1	homozygous	1	596	1834	65.6	not_applicable	GJD4	FZD8	27387	yes
FALSE	1810	10	35603726	10	35610862	10	35892654	10	35899790	2272	1.78242e+06	1791386	insertion	1	-1	homozygous	1	596	1834	65.6	not_applicable	GJD4	FZD8	27387	yes
FALSE	1816	10	43176614	10	43194993	10	43672062	10	43690441	14450	100038	120117	insertion	1	-1	homozygous	1	-1	1700	86.1	not_applicable	CSGALNACT2;RASGEF1A	L13714	29341	yes
FALSE	1817	10	43418313	10	43437787	10	43913761	10	43933235	21890	55592.3	77002	insertion	1	-1	homozygous	1	-1	1936	17.2	not_applicable	DQ588911;ZNF487	HNRNPF	10463	yes
FALSE	1821	10	47172055	10	47181252	10	48567305	10	48558108	27001	886455	897663	insertion	1	-1	homozygous	1	599	2011	98	not_applicable	-	GDF10	118972	yes
FALSE	1822	10	47172055	10	47181252	10	48567305	10	48558108	27002	886455	897663	insertion	1	-1	homozygous	1	599	2011	98	not_applicable	-	GDF10	118972	yes
FALSE	1824	10	56768390	10	56807967	10	58528150	10	58567727	31041	1.26917e+06	1.31264e+06	insertion	1	-1	homozygous	1	600	3901	39.7	not_applicable	-	DQ587130	254306	yes
FALSE	1825	10	56768390	10	56807967	10	58528150	10	58567727	31042	1.26917e+06	1.31264e+06	insertion	1	-1	homozygous	1	600	3901	39.7	not_applicable	-	DQ587130	254306	yes
FALSE	1826	10	59878820	10	59885167	10	61638578	10	61644925	28382	503330	510995	insertion	1	-1	homozygous	1	601	1317	27.2	not_applicable	CCDC6	C10orf40	70263	yes
FALSE	1827	10	59878820	10	59885167	10	61638578	10	61644925	28381	2.89672e+06	2.90438e+06	insertion	1	-1	homozygous	1	601	1318	27.2	not_applicable	CCDC6	C10orf40	70263	yes
FALSE	1828	10	62368222	10	62374727	10	64127981	10	64134486	28381	409520	417455	insertion	1	-1	homozygous	1	602	1430	97.4	not_applicable	LOC283045;ZNF365	DQ596066	16532	yes
FALSE	1830	10	62368222	10	62374727	10	64127981	10	64134486	62402	393740	401674	insertion	1	-1	homozygous	1	602	1430	97.4	not_applicable	LOC283045;ZNF365	DQ596066	16532	yes
FALSE	1831	10	65536325	10	65590811	10	67296083	10	67350569	26541	797862	843846	deletion	1	-1	homozygous	1	603	8501	19.9	not_applicable	-	DQ571826	71856	yes
FALSE	1832	10	65536325	10	65590811	10	67296083	10	67350569	26542	674426	720410	deletion	1	-1	homozygous	1	603	8501	19.9	not_applicable	-	DQ571826	71856	yes
FALSE	1833	10	69597774	10	69610573	10	71357530	10	71370329	7761	533409	548528	insertion	1	-1	heterozygous	1	-1	2321	41.1	not_applicable	-	C10orf35	19674	yes
FALSE	1835	10	69783352	10	69787621	10	71543108	10	71547377	7762	719552	725421	insertion	1	-1	heterozygous	1	-1	1600	31.8	not_applicable	-	COL13A1	14267	yes
FALSE	1836	10	70659591	10	70675832	10	72419347	10	72435588	4002	340781	360540	insertion	1	-1	heterozygous	1	-1	3518	0	not_applicable	JC172250;ADAMTS14	DQ578550	10709	yes
FALSE	1837	10	70684772	10	70692256	10	72444528	10	72452012	4002	323210	331887	insertion	1	-1	heterozygous	1	-1	1194	2	not_applicable	ADAMTS14;DQ578550;DQ575296;DQ588911;DQ588545;DQ598327	DQ580710	21880	yes
FALSE	1839	10	74812572	10	74823058	10	76572330	10	76582816	422	1.14006e+06	1.15256e+06	insertion	1	-1	homozygous	1	604	2017	97.4	not_applicable	-	KAT6B	3355	yes
FALSE	1840	10	76482152	10	76511126	10	78241910	10	78270884	422	2.81314e+06	2.83639e+06	deletion	1	-1	heterozygous	1	605	5731	49.7	not_applicable	C10orf11	DQ589229	240909	yes
FALSE	1841	10	76577320	10	76587257	10	78337078	10	78347015	422	2.90254e+06	2.907e+06	deletion	1	-1	homozygous	1	606	5478	33.1	not_applicable	-	C10orf11	19953	yes
FALSE	1842	10	74812572	10	74823058	10	76572330	10	76582816	421	1.12113e+06	1.13363e+06	insertion	1	-1	homozygous	1	604	2016	97.4	not_applicable	-	KAT6B	3355	yes
FALSE	1844	10	76489573	10	76511126	10	78249331	10	78270884	421	2.80158e+06	2.81746e+06	deletion	1	-1	heterozygous	2	605	5669	49.7	not_applicable	C10orf11	DQ589229	248330	yes
FALSE	1845	10	76577320	10	76587257	10	78337078	10	78347015	421	2.88361e+06	2.88807e+06	deletion	1	-1	homozygous	1	606	5479	33.1	not_applicable	-	C10orf11	19953	yes
FALSE	1846	10	80618923	10	80629899	10	82378679	10	82389655	7642	359096	373051	insertion	1	-1	homozygous	1	607	2979	17.9	not_applicable	SH2D4B	DQ596630	75128	yes
FALSE	1847	10	80618923	10	80629899	10	82378679	10	82389655	7641	341860	355814	insertion	1	-1	homozygous	1	607	2979	17.9	not_applicable	SH2D4B	DQ596630	75128	yes
FALSE	1848	10	81199733	10	81215116	10	82959489	10	82974872	21151	52594	69796.2	insertion	1	-1	homozygous	1	608	1819	46.4	not_applicable	-	JC172275	55013	yes
FALSE	1849	10	81199733	10	81215116	10	82959489	10	82974872	21152	52594	69796.2	insertion	1	-1	homozygous	1	608	1819	46.4	not_applicable	-	JC172275	55013	yes
FALSE	1850	10	83127888	10	83133558	10	84887644	10	84893314	28891	450411	460000	insertion	1	-1	heterozygous	1	-1	3918	23.2	not_applicable	-	NRG3	140710	yes
FALSE	1851	10	83206191	10	83219312	10	84965947	10	84979068	28891	359906	377922	insertion	1	-1	heterozygous	1	-1	4896	44.4	not_applicable	-	DQ587130	158827	yes
FALSE	1852	10	86495006	10	86505818	10	88254763	10	88265575	14141	506015	520193	insertion	1	-1	homozygous	1	609	3365	98.7	not_applicable	WAPAL	DQ591044	39566	yes
FALSE	1853	10	86495006	10	86505818	10	88254763	10	88265575	14142	506015	520193	insertion	1	-1	homozygous	1	609	3365	98.7	not_applicable	WAPAL	DQ591044	39566	yes
FALSE	1854	10	89956321	10	8.997e+07	10	91716078	10	91729787	7611	739466	759094	insertion	1	-1	homozygous	1	610	5920	10.6	not_applicable	AK093219	LINC00865	115461	yes
FALSE	1855	10	89956321	10	8.997e+07	10	91716078	10	91729787	7612	739466	759094	insertion	1	-1	homozygous	1	610	5920	10.6	not_applicable	AK093219	LINC00865	115461	yes
FALSE	1857	10	92373936	10	92385203	10	94133693	10	94144960	9891	681026	689393	deletion	1	-1	homozygous	1	611	2900	84.1	not_applicable	DQ586320	U02063	13056	yes
FALSE	1858	10	92373936	10	92385203	10	94133693	10	94144960	9892	681026	689393	deletion	1	-1	homozygous	1	611	2900	84.1	not_applicable	DQ586320	U02063	13056	yes
FALSE	1859	10	96437676	10	96442874	10	98197433	10	98202631	25961	2522173	2.52864e+06	insertion	1	-1	homozygous	1	612	1272	99.3	not_applicable	TLL2	TM9SF3	75236	yes
FALSE	1860	10	96437676	10	96442874	10	98197433	10	98202631	25962	2.51864e+06	2.52511e+06	insertion	1	-1	homozygous	1	612	1273	99.3	not_applicable	TLL2	TM9SF3	75236	yes
FALSE	1861	10	101847851	10	101855944	10	103607608	10	103615701	15701	85108.5	94893.4	insertion	1	-1	homozygous	1	613	1692	94	not_applicable	C10orf76	KCNIP2	3932	yes
FALSE	1862	10	101847851	10	101855944	10	103607608	10	103615701	15702	85108.5	94893.4	insertion	1	-1	homozygous	1	613	1692	94	not_applicable	C10orf76	KCNIP2	3932	yes
FALSE	1863	10	102637023	10	102647618	10	104396780	10	104407375	4801	411476	423488	insertion	1	-1	homozygous	1	614	1418	98	not_applicable	TRIM8	SUFU	3567	yes
FALSE	1864	10	103240416	10	103255565	10	105000173	10	105015322	4801	1018153	1.03551e+06	insertion	1	-1	homozygous	1	615	2205	80.1	not_applicable	BC040734;RPEL1	INA	21598	yes
FALSE	1865	10	102637023	10	102647618	10	104396780	10	104407375	4802	411476	423488	insertion	1	-1	homozygous	1	614	1418	98	not_applicable	TRIM8	SUFU	3567	yes
FALSE	1866	10	103240416	10	103255565	10	105000173	10	105015322	4802	1018153	1.03551e+06	insertion	1	-1	homozygous	1	615	2205	80.1	not_applicable	BC040734;RPEL1	INA	21598	yes
FALSE	1869	10	107371899	10	107380935	10	109131657	10	109140693	10362	116120	123833	deletion	0.99	-1	heterozygous	1	-1	1324	0	not_applicable	-	DQ587130	54392	yes
FALSE	1870	10	108081990	10	108100833	10	109841748	10	109860591	29421	2.09508e+06	2.11577e+06	insertion	1	-1	homozygous	1	617	1850	94.7	not_applicable	-	DQ600853	130882	yes
FALSE	1871	10	109198786	10	109215909	10	110958544	10	110975667	29421	973408	998610	insertion	1	-1	heterozygous	1	-1	8080	9.3	not_applicable	-	U6	23730	yes
FALSE	1872	10	1.098e+08	10	109820653	10	111559390	10	111580411	29421	376382	391128	deletion	1	-1	homozygous	1	618	6276	90.7	not_applicable	-	XPNPEP1	44113	yes
FALSE	1873	10	108081990	10	108100833	10	109841748	10	109860591	29422	2.08685e+06	2.10755e+06	insertion	1	-1	homozygous	1	617	1850	94.7	not_applicable	-	DQ600853	130882	yes
FALSE	1874	10	1.098e+08	10	109820653	10	111559390	10	111580411	29422	376382	391128	deletion	1	-1	homozygous	1	618	6276	90.7	not_applicable	-	XPNPEP1	44113	yes
FALSE	1875	10	1.11241e+08	10	111246181	10	113000512	10	113005939	20230	147554	154238	insertion	1	-1	homozygous	1	-1	1256	2	not_applicable	-	DQ587130	69864	yes
FALSE	1876	10	112346399	10	112361408	10	114106157	10	114121166	4222	4354.2	14971.9	deletion	1	-1	homozygous	1	-1	4392	19.2	not_applicable	GUCY2GP	DQ596630	10362	yes
FALSE	1878	10	114077668	10	114088316	10	115837427	10	115848075	8061	480952	493291	insertion	1	-1	homozygous	1	619	1690	96.7	not_applicable	-	U02063	13657	yes
FALSE	1880	10	114077668	10	114088316	10	115837427	10	115848075	8062	480952	493291	insertion	1	-1	homozygous	1	619	1690	96.7	not_applicable	-	U02063	13657	yes
FALSE	1882	10	119531909	10	119551272	10	121291421	10	121310784	11641	103180	124578	insertion	1	-1	homozygous	1	621	2034	96	not_applicable	RGS10	DQ578550	7906	yes
FALSE	1883	10	119531909	10	119551272	10	121291421	10	121310784	11642	103180	124578	insertion	1	-1	homozygous	1	621	2034	96	not_applicable	RGS10	DQ578550	7906	yes
FALSE	1884	10	120461053	10	1.20475e+08	10	122220565	10	122234310	13401	118180	130379	deletion	0.98	-1	homozygous	1	622	1544	67.5	not_applicable	PPAPDC1A	JC172208	58203.5	yes
FALSE	1885	10	120461053	10	1.20475e+08	10	122220565	10	122234310	13402	118180	130379	deletion	0.98	-1	homozygous	1	622	1544	67.5	not_applicable	PPAPDC1A	JC172208	58203.5	yes
FALSE	1886	10	122605403	10	122613521	10	124364919	10	124373037	25212	1.72047e+06	1.72451e+06	deletion	1	-1	homozygous	1	623	4079	47.7	not_applicable	DMBT1	C10orf120	84188	yes
FALSE	1887	10	123252517	10	123263144	10	125012033	10	125022660	25212	2.36379e+06	2.37809e+06	insertion	1	-1	homozygous	1	624	3665	92.7	not_applicable	-	DQ596939	20010	yes
FALSE	1888	10	122605403	10	122613521	10	124364919	10	124373037	25211	1.72047e+06	1.72451e+06	deletion	1	-1	homozygous	1	623	4079	47.7	not_applicable	DMBT1	C10orf120	84188	yes
FALSE	1889	10	123252517	10	123263144	10	125012033	10	125022660	25211	2.36379e+06	2.37809e+06	insertion	1	-1	homozygous	1	624	3665	92.7	not_applicable	-	DQ596939	20010	yes
FALSE	1892	10	126939190	10	126956197	#N/A	#N/A	#N/A	#N/A	30151	462604	488980	insertion	1	-1	homozygous	1	625	9368	78.8	not_applicable	DOCK1	FAM196A	179229	yes
FALSE	1893	10	126939190	10	126956197	#N/A	#N/A	#N/A	#N/A	30152	462604	488980	insertion	1	-1	homozygous	1	625	9368	78.8	not_applicable	DOCK1	FAM196A	179229	yes
FALSE	1894	10	128463139	10	128464756	10	130261403	10	130263020	7681	269126	273909	insertion	1	-1	homozygous	1	626	3165	57	not_applicable	-	AK124226	145414	yes
FALSE	1895	10	128463139	10	128464756	10	130261403	10	130263020	7682	269126	273909	insertion	1	-1	homozygous	1	626	3165	57	not_applicable	-	AK124226	145414	yes
FALSE	1897	10	129516080	10	129519633	10	131314344	10	131317897	10411	63769.3	68410.5	insertion	1	-1	homozygous	1	627	1088	96	not_applicable	MGMT	JC172250	314441	yes
FALSE	1898	10	129516080	10	129519633	10	131314344	10	131317897	10412	63769.3	68410.5	insertion	1	-1	homozygous	1	627	1088	96	not_applicable	MGMT	JC172250	314441	yes
FALSE	1900	10	130492173	10	130499853	10	132290437	10	132298117	9442	354086	363224	insertion	1	-1	heterozygous	1	-1	1458	22.5	not_applicable	-	GLRX3	312506	yes
FALSE	1901	10	130782778	10	130796342	10	132581042	10	132594606	4161	781980	797288	insertion	1	-1	homozygous	1	628	1744	80.8	not_applicable	-	DQ571825	44783	yes
FALSE	1903	10	131174065	10	131180986	10	132972328	10	132979249	4161	392890	401300	insertion	1	-1	homozygous	1	629	1490	92.7	not_applicable	TCERG1L	JC172250	143398	yes
FALSE	1904	10	130782778	10	130796342	10	132581042	10	132594606	4162	775956	791264	insertion	1	-1	homozygous	1	628	1744	80.8	not_applicable	-	DQ571825	44783	yes
FALSE	1905	10	131102642	10	131118191	10	132900905	10	132916454	4162	457646	469425	deletion	1	-1	heterozygous	1	-1	3771	20.5	not_applicable	TCERG1L	JC172250	71975	yes
FALSE	1906	10	131174065	10	131180986	10	132972328	10	132979249	4162	392890	401300	insertion	1	-1	homozygous	1	629	1490	92.7	not_applicable	TCERG1L	JC172250	143398	yes
FALSE	1907	10	131819207	10	131829209	10	133651543	10	133661545	15170	118971	131028	insertion	1	-1	homozygous	1	-1	2055	16.6	not_applicable	-	LINC01164	29009	yes
FALSE	1908	10	131848850	10	131852495	#N/A	#N/A	#N/A	#N/A	15170	94384.3	99065.7	insertion	1	-1	homozygous	1	-1	1036	35.1	not_applicable	-	PPP2R2D	48149	yes
FALSE	1909	10	131874128	10	131888064	#N/A	#N/A	#N/A	#N/A	15170	56849.9	72353.5	insertion	1	-1	homozygous	1	-1	1568	25.2	not_applicable	-	PPP2R2D	12580	yes
FALSE	1910	10	132166373	10	132175328	10	133979877	10	133988832	12751	223570	234969	insertion	1	-1	homozygous	1	630	2444	97.4	not_applicable	JAKMIP3	DPYSL4	11582	yes
FALSE	1911	10	132166373	10	132175328	10	133979877	10	133988832	12752	223570	234969	insertion	1	-1	homozygous	1	630	2444	97.4	not_applicable	JAKMIP3	DPYSL4	11582	yes
FALSE	1912	10	1.32385e+08	10	132395517	10	134198432	10	134209021	13591	93594.4	106170	insertion	1	-1	homozygous	1	631	1986	57	not_applicable	-	PWWP2B	1681	yes
FALSE	1913	10	1.32385e+08	10	132395517	10	134198432	10	134209021	13592	93594.4	106170	insertion	1	-1	homozygous	1	631	1986	57	not_applicable	-	PWWP2B	1681	yes
FALSE	1915	10	133107553	10	133114315	10	134921057	10	134927819	13350	111413	120010	insertion	1	-1	homozygous	1	-1	1836	28.5	not_applicable	GPR123	CS330190	30559	yes
FALSE	1917	10	133468013	10	1.3349e+08	10	135281517	10	135303708	13350	474771	493744	deletion	1	-1	homozygous	1	-1	3217	61.6	not_applicable	SCART1	CYP2E1	37159.5	yes
FALSE	1923	11	336372	11	366388	11	336372	11	366388	9012	317204	351350	insertion	1	-1	homozygous	1	635	4129	60.3	not_applicable	-	B4GALNT4	3407	yes
FALSE	1924	11	393294	11	398420	11	393294	11	398420	9012	379168	385909	insertion	1	-1	heterozygous	1	-1	1615	6.6	not_applicable	PKP3	DQ572620	3876	yes
FALSE	1927	11	336372	11	366388	11	336372	11	366388	9011	317204	351350	insertion	1	-1	homozygous	1	635	4129	60.3	not_applicable	-	B4GALNT4	3407	yes
FALSE	1928	11	637571	11	671911	11	637571	11	671911	22701	227284	264963	insertion	1	-1	homozygous	1	636	3339	82.1	not_applicable	DRD4;DEAF1	SCT	10399	yes
FALSE	1929	11	581475	11	585983	11	581475	11	585983	22702	315124	321685	insertion	0.99	-1	heterozygous	1	-1	2053	32.5	not_applicable	PHRF1	LOC143666	5591	yes
FALSE	1930	11	637571	11	671911	11	637571	11	671911	22702	227284	263201	insertion	1	-1	homozygous	1	636	1577	77.5	not_applicable	DRD4;DEAF1	SCT	10399	yes
FALSE	1932	11	1077810	11	1.10258e+06	11	1077954	11	1096493	22661	283560	312863	insertion	1	-1	homozygous	1	637	4528	56.3	not_applicable	MUC2	MUC6	41105	yes
FALSE	1935	11	1181985	11	1197187	#N/A	#N/A	11	1218413	22662	185923	202981	insertion	1	-1	heterozygous	1	-1	1856	11.3	not_applicable	MUC5AC;MUC5AC;MUC5AC;Z48314	MUC5B	25878	yes
FALSE	1937	11	1425610	11	1433783	11	1446840	11	1455013	2671	41075	46931.5	deletion	1	-1	heterozygous	1	-1	2317	33.1	not_applicable	BRSK2	MOB2	35672	yes
FALSE	1939	11	1536352	11	1600299	11	1557582	11	1621529	2671	150435	223683	insertion	1	-1	heterozygous	1	640	9301	89.4	not_applicable	DUSP8;KRTAP5-AS1;KRTAP5-1;KRTAP5-2	KRTAP5-3	7266	yes
FALSE	1940	11	1891015	11	1943801	11	1912245	11	1965031	2671	516274	571404	insertion	1	-1	homozygous	1	641	2344	86.8	not_applicable	LSP1;TNNT3	MRPL23	3471	yes
FALSE	1942	11	1536352	11	1546870	11	1557582	11	1568100	2672	135346	152025	insertion	1	-1	heterozygous	2	640	6162	89.4	not_applicable	-	DUSP8	7181	yes
FALSE	1943	11	1891015	11	1943801	11	1912245	11	1965031	2672	498585	553714	insertion	1	-1	homozygous	1	641	2344	86.8	not_applicable	LSP1;TNNT3	MRPL23	3471	yes
FALSE	1944	11	3644532	11	3658522	11	3665762	11	3679752	24941	335898	381580	insertion	0.99	-1	heterozygous	1	-1	31691	30.5	not_applicable	ART1	ART5	2278	yes
FALSE	1945	11	4931191	11	4972994	11	4952421	11	4994224	2381	1.34872e+06	1.3819e+06	deletion	1	-1	homozygous	1	642	8629	33.8	not_applicable	OR51A4;OR51A2	OR51G1	6853	yes
FALSE	1946	11	4931191	11	4972994	11	4952421	11	4994224	2382	1.34872e+06	1.3819e+06	deletion	1	-1	homozygous	1	642	8629	33.8	not_applicable	OR51A4;OR51A2	OR51G1	6853	yes
FALSE	1948	11	7813250	11	7862953	11	7834797	11	7884500	11091	154451	224707	insertion	1	-1	homozygous	1	643	20552	14.6	not_applicable	OR5P3;OR5E1P;RP11-494M8.4	DQ594820	2378	yes
FALSE	1949	11	8159230	11	8168367	11	8180777	11	8189914	11091	520571	531306	insertion	1	-1	homozygous	1	644	1599	76.2	not_applicable	RIC3	TUB	53124	yes
FALSE	1950	11	7813250	11	7862953	11	7834797	11	7884500	11092	156088	226344	insertion	1	-1	homozygous	1	643	20552	14.6	not_applicable	OR5P3;OR5E1P;RP11-494M8.4	DQ594820	2378	yes
FALSE	1951	11	8159230	11	8168367	11	8180777	11	8189914	11092	522208	532943	insertion	1	-1	homozygous	1	644	1599	76.2	not_applicable	RIC3	TUB	53124	yes
FALSE	1952	11	8816634	11	8819620	11	8838181	11	8841167	4581	608267	613774	insertion	1	-1	heterozygous	1	-1	2520	58.3	not_applicable	-	ST5	5958	yes
FALSE	1958	11	11235386	11	11249520	11	11256933	11	11271067	11151	22536	41573.8	insertion	1	-1	homozygous	1	647	4903	95.4	not_applicable	-	GALNT18	21354	yes
FALSE	1959	11	11235386	11	11249520	11	11256933	11	11271067	11152	22536	41573.8	insertion	1	-1	homozygous	1	647	4903	95.4	not_applicable	-	GALNT18	21354	yes
FALSE	1961	11	11921380	11	11938638	11	11942927	11	11960185	28681	227137	246979	insertion	1	-1	heterozygous	1	-1	2585	16.6	not_applicable	USP47	DKK3	24358	yes
FALSE	1965	11	14260402	11	14292505	11	14281948	11	14314051	3391	368720	403863	insertion	1	-1	homozygous	1	648	3040	82.8	not_applicable	SPON1;RRAS2	L13714	34274	yes
FALSE	1967	11	14260402	11	14292505	11	14281948	11	14314051	3392	368720	403863	insertion	1	-1	homozygous	1	648	3040	82.8	not_applicable	SPON1;RRAS2	L13714	34274	yes
FALSE	1972	11	18378847	11	18400032	11	18400394	11	18421579	4091	628909	652639	insertion	1	-1	homozygous	1	651	2545	90.7	not_applicable	MIR3159;LDHA	JC172214	8246	yes
FALSE	1974	11	18378847	11	18400032	11	18400394	11	18421579	4092	628909	652639	insertion	1	-1	homozygous	1	651	2545	90.7	not_applicable	MIR3159;LDHA	JC172214	8246	yes
FALSE	1976	11	23322629	11	23367042	11	23344175	11	23388588	26361	325359	373377	insertion	0.99	-1	homozygous	1	652	3605	78.8	not_applicable	-	MIR8054	52063	yes
FALSE	1977	11	23322629	11	23367042	11	23344175	11	23388588	26362	325359	373377	insertion	0.99	-1	homozygous	1	652	3605	78.8	not_applicable	-	MIR8054	52063	yes
FALSE	1978	11	24374923	11	24381570	11	24396469	11	24403116	25470	331617	345946	insertion	1	-1	homozygous	1	-1	7682	27.8	not_applicable	-	DQ596939	34231	yes
FALSE	1979	11	28981446	11	29004044	11	29002993	11	29025591	1061	1.20074e+06	1.21756e+06	deletion	1	-1	homozygous	1	653	5777	47	not_applicable	DQ587130	DQ578736	101251	yes
FALSE	1980	11	28981446	11	29004044	11	29002993	11	29025591	1062	1.20074e+06	1.21756e+06	deletion	1	-1	homozygous	1	653	5777	47	not_applicable	DQ587130	DQ578736	101251	yes
FALSE	1981	11	30920647	11	30931129	11	30942194	11	30952676	30861	156350	168499	insertion	1	-1	homozygous	1	654	1666	94.7	not_applicable	DCDC5	DCDC1	331495	yes
FALSE	1982	11	30920647	11	30931129	11	30942194	11	30952676	30862	156350	168499	insertion	1	-1	homozygous	1	654	1666	94.7	not_applicable	DCDC5	DCDC1	331495	yes
FALSE	1983	11	31359835	11	31395981	11	31381382	11	31417528	5741	804574	836826	deletion	1	-1	homozygous	1	655	3894	19.2	not_applicable	DCDC1;DNAJC24	IMMP1L	36421	yes
FALSE	1984	11	31359835	11	31395981	11	31381382	11	31417528	5742	804574	836826	deletion	1	-1	homozygous	1	655	3894	19.2	not_applicable	DCDC1;DNAJC24	IMMP1L	36421	yes
FALSE	1985	11	33643973	11	33650458	11	33665519	11	33672004	16242	176961	185181	insertion	1	-1	homozygous	1	656	1735	57	not_applicable	KIAA1549L	C11orf91	47650	yes
FALSE	1986	11	33643973	11	33650458	11	33665519	11	33672004	16241	180947	189168	insertion	1	-1	homozygous	1	656	1735	57	not_applicable	KIAA1549L	C11orf91	47650	yes
FALSE	1988	11	36308842	11	36311115	11	36330392	11	36332665	6391	237842	242379	insertion	1	-1	homozygous	1	657	2265	92.7	not_applicable	-	DQ580215	10366	yes
FALSE	1989	11	36308842	11	36311115	11	36330392	11	36332665	6392	237842	242379	insertion	1	-1	homozygous	1	657	2265	92.7	not_applicable	-	DQ580215	10366	yes
FALSE	1991	11	38788101	11	38792747	11	38809651	11	38814297	15930	327467	333436	insertion	1	-1	homozygous	1	-1	1322	65.6	not_applicable	-	BC041035	287916	yes
FALSE	1992	11	45406272	11	45416087	11	45427822	11	45437637	2701	937475	945756	deletion	0.98	-1	homozygous	1	658	1534	43	not_applicable	-	AK123417	17765	yes
FALSE	1993	11	45406272	11	45416087	11	45427822	11	45437637	2702	937475	945756	deletion	0.98	-1	homozygous	1	658	1534	43	not_applicable	-	AK123417	17765	yes
FALSE	1994	11	47493125	11	47509174	11	47514677	11	47530726	741	82283.2	96469.5	deletion	0.99	-1	heterozygous	1	-1	1863	1.3	not_applicable	-	CELF1	4102	yes
FALSE	1995	11	47637438	11	47646702	11	47658990	11	47668254	741	225726	239712	insertion	1	-1	homozygous	1	659	4721	96.7	not_applicable	MTCH2	AGBL2	12889	yes
FALSE	1996	11	47889153	11	47894048	11	47910705	11	47915600	741	482176	491412	insertion	1	-1	homozygous	1	660	4340	90.7	not_applicable	-	DQ594820	12823	yes
FALSE	1997	11	48570185	11	48593942	11	48591737	11	48615494	741	1.16634e+06	1.18656e+06	deletion	1	-1	heterozygous	1	-1	3533	47	not_applicable	-	DQ594820	41338	yes
FALSE	1999	11	47553408	11	4.75652e+07	11	47574960	11	47586794	742	142172	155334	insertion	1	-1	heterozygous	1	-1	1328	96	not_applicable	-	PTPMT1	188.2	yes
FALSE	2000	11	47637438	11	47646702	11	47658990	11	47668254	742	227424	241410	insertion	1	-1	homozygous	1	659	4721	96.7	not_applicable	MTCH2	AGBL2	12889	yes
FALSE	2001	11	47889153	11	47894048	11	47910705	11	47915600	742	483874	493110	insertion	1	-1	homozygous	1	660	4340	90.7	not_applicable	-	DQ594820	12823	yes
FALSE	2008	11	56373561	11	56390187	11	56141037	11	56157663	25291	822845	846877	insertion	1	-1	homozygous	1	662	7407	74.8	not_applicable	OR8U1	DQ571358	11532	yes
FALSE	2009	11	56694059	11	56698202	11	56461535	11	56465678	25291	1.14983e+06	1164966	insertion	1	-1	homozygous	1	663	10993	96.7	not_applicable	-	OR9G1	2186	yes
FALSE	2010	11	56373561	11	56390187	11	56141037	11	56157663	25292	822845	846877	insertion	1	-1	homozygous	1	662	7407	74.8	not_applicable	OR8U1	DQ571358	11532	yes
FALSE	2011	11	56694059	11	56698202	11	56461535	11	56465678	25292	1.14983e+06	1164966	insertion	1	-1	homozygous	1	663	10993	96.7	not_applicable	-	OR9G1	2186	yes
FALSE	2012	11	59277656	11	59285325	11	59045129	11	59052798	5191	654520	663748	insertion	1	-1	homozygous	1	664	1559	97.4	not_applicable	-	MPEG1	64636	yes
FALSE	2013	11	59277656	11	59285325	11	59045129	11	59052798	5192	654520	663748	insertion	1	-1	homozygous	1	664	1559	97.4	not_applicable	-	MPEG1	64636	yes
FALSE	2015	11	6.12375e+07	11	61242352	11	61005016	11	61009824	20360	113803	137226	insertion	1	-1	heterozygous	1	-1	18613	0	not_applicable	PGA5	PGA4	5837.5	yes
FALSE	2019	11	63420375	11	63421143	11	63187847	11	63188615	1861	839814	856076	insertion	1	-1	heterozygous	1	-1	15493	3.3	not_applicable	-	SLC22A9	10136	yes
FALSE	2020	11	64535380	11	64560052	11	64302852	11	64327524	22091	660885	688752	insertion	1	-1	homozygous	1	666	3195	98	not_applicable	SLC22A11	SLC22A12	30758	yes
FALSE	2021	11	64535380	11	64560052	11	64302852	11	64327524	22092	660885	688752	insertion	1	-1	homozygous	1	666	3195	98	not_applicable	SLC22A11	SLC22A12	30758	yes
FALSE	2022	11	65970712	11	65976967	11	65738183	11	65744438	10671	171027	179042	insertion	1	-1	heterozygous	1	-1	1759	49.7	not_applicable	SART1	TSGA10IP	10750	yes
FALSE	2023	11	65872258	11	65878294	11	65639729	11	65645765	10672	72097.5	76610.2	deletion	0.98	-1	heterozygous	1	-1	1523	65.6	not_applicable	EFEMP2	CTSW	1519	yes
FALSE	2024	11	66388848	11	66405497	11	66156319	11	66172968	11611	135466	154307	insertion	1	-1	heterozygous	1	-1	2193	53	not_applicable	-	NPAS4	15507	yes
FALSE	2025	11	66935429	11	66951268	11	66702900	11	66718739	7001	461858	476003	deletion	0.99	-1	homozygous	1	667	1693	35.1	not_applicable	-	MIR3163	924	yes
FALSE	2026	11	66935429	11	66951268	11	66702900	11	66718739	7002	461858	476003	deletion	0.99	-1	homozygous	1	667	1693	35.1	not_applicable	-	MIR3163	924	yes
FALSE	2028	11	68869976	11	68898521	11	68637444	11	68665989	2141	756890	788694	insertion	1	-1	homozygous	1	668	3260	100	not_applicable	AK128555;MRPL21	IGHMBP2	5330	yes
FALSE	2030	11	69173822	11	69187527	11	68941290	11	68954995	2141	459922	477163	insertion	1	-1	homozygous	1	669	3536	96.7	not_applicable	-	RP11-554A11.8	2261	yes
FALSE	2031	11	68869976	11	68898521	11	68637444	11	68665989	2142	756890	788694	insertion	1	-1	homozygous	1	668	3260	100	not_applicable	AK128555;MRPL21	IGHMBP2	5330	yes
FALSE	2032	11	69173822	11	69187527	11	68941290	11	68954995	2142	459922	477163	insertion	1	-1	homozygous	1	669	3536	96.7	not_applicable	-	RP11-554A11.8	2261	yes
FALSE	2037	11	72599885	11	72602834	11	72310929	11	72313878	6790	79782.5	84573.9	insertion	1	-1	homozygous	1	-1	1842	94.7	not_applicable	PDE2A	MIR139	12229	yes
FALSE	2045	11	92306681	11	92332036	11	92039847	11	92065202	24511	372759	402311	insertion	1	-1	homozygous	1	673	4197	90.7	not_applicable	-	FAT3	20060	yes
FALSE	2046	11	92704362	11	92706991	11	92437528	11	92440157	24511	773441	778104	insertion	1	-1	homozygous	1	674	2034	89.4	not_applicable	FAT3	DQ593458	15501	yes
FALSE	2047	11	9.3287e+07	11	93293594	11	93020132	11	93026760	24511	1.35852e+06	1.36394e+06	deletion	0.99	-1	homozygous	1	675	1203	21.9	not_applicable	-	DQ587130	16095	yes
FALSE	2048	11	92306681	11	92332036	11	92039847	11	92065202	24512	372759	402311	insertion	1	-1	homozygous	1	673	4197	90.7	not_applicable	-	FAT3	20060	yes
FALSE	2049	11	92704362	11	92706991	11	92437528	11	92440157	24512	773441	778104	insertion	1	-1	homozygous	1	674	2034	89.4	not_applicable	FAT3	DQ593458	15501	yes
FALSE	2050	11	9.3287e+07	11	93293594	11	93020132	11	93026760	24512	1.35852e+06	1.36394e+06	deletion	0.99	-1	homozygous	1	675	1203	21.9	not_applicable	-	DQ587130	16095	yes
FALSE	2051	11	93419293	11	93443529	11	93152459	11	93176695	3301	1.37776e+06	1.39593e+06	deletion	1	-1	homozygous	1	676	6067	82.8	not_applicable	CCDC67	JB751182	11403	yes
FALSE	2052	11	94236234	11	94237004	11	93969400	11	93970170	3301	556116	584251	insertion	1	-1	heterozygous	1	677	27365	42.4	not_applicable	-	PANX1	54264	yes
FALSE	2053	11	93419293	11	93443529	11	93152459	11	93176695	3302	1.41096e+06	1429133	deletion	1	-1	homozygous	1	676	6066	82.8	not_applicable	CCDC67	JB751182	11403	yes
FALSE	2054	11	94236234	11	94237004	11	93969400	11	93970170	3302	556116	617451	insertion	1	-1	heterozygous	2	677	60564	55.6	not_applicable	-	PANX1	54264	yes
FALSE	2055	11	94949378	11	94964077	11	94682543	11	94697242	16622	155175	174200	insertion	0.99	-1	heterozygous	1	-1	4327	6.6	not_applicable	CWC15	KDM4D	9604	yes
FALSE	2058	11	99814596	11	99834158	11	99685327	11	99704889	28082	2.01095e+06	2.03296e+06	insertion	1	-1	heterozygous	1	-1	2445	70.2	not_applicable	CNTN5	DQ572566	27871	yes
FALSE	2060	11	1.0272e+08	11	1.02731e+08	11	102590633	11	102601564	20050	126483	138921	insertion	1	-1	homozygous	1	-1	1506	86.1	not_applicable	MMP8	MMP27	14165.5	yes
FALSE	2062	11	104394241	11	104409672	11	104264969	11	104280400	4561	179717	189604	deletion	1	-1	homozygous	1	678	5544	54.3	not_applicable	-	DQ596939	12299	yes
FALSE	2063	11	104394241	11	104409672	11	104264969	11	104280400	4562	179717	189604	deletion	1	-1	homozygous	1	678	5544	54.3	not_applicable	-	DQ596939	12299	yes
FALSE	2066	11	111038322	11	111043835	11	110909046	11	110914559	26531	245042	249420	deletion	0.99	-1	homozygous	1	680	1135	0	not_applicable	5S_rRNA	DQ596630	178686	yes
FALSE	2067	11	111043835	11	111058961	11	110914559	11	110929685	26531	228753	245042	insertion	1	-1	heterozygous	1	-1	1163	0	not_applicable	-	5S_rRNA	3628	yes
FALSE	2068	11	110492238	11	1.10511e+08	11	110362962	11	110381379	26532	776868	801280	insertion	1	-1	heterozygous	1	-1	5997	21.9	not_applicable	-	JC172253	22443.5	yes
FALSE	2069	11	111038322	11	111043835	11	110909046	11	110914559	26532	245042	249420	deletion	0.99	-1	homozygous	1	680	1135	0	not_applicable	5S_rRNA	DQ596630	178686	yes
FALSE	2070	11	114833855	11	114846081	11	114704577	11	114716803	1821	7321.6	21080.7	insertion	1	-1	homozygous	1	681	1533	11.3	not_applicable	-	FAM55B	125536	yes
FALSE	2071	11	114833855	11	114846081	11	114704577	11	114716803	1822	7321.6	21080.7	insertion	1	-1	homozygous	1	681	1533	11.3	not_applicable	-	FAM55B	125536	yes
FALSE	2076	11	117799469	11	117818118	11	117670184	11	117688833	5851	181003	198482	deletion	0.99	-1	homozygous	1	683	1171	13.9	not_applicable	-	FXYD6-FXYD2	1957	yes
FALSE	2077	11	117799469	11	117818118	11	117670184	11	117688833	5852	181003	198482	deletion	0.99	-1	homozygous	1	683	1171	13.9	not_applicable	-	FXYD6-FXYD2	1957	yes
FALSE	2079	11	118406309	11	118425148	11	118277024	11	118295863	2511	407410	429373	insertion	1	-1	homozygous	1	684	3123	94.7	not_applicable	LOC100131626;ATP5L	UBE4A	7099	yes
FALSE	2080	11	118406309	11	118425148	11	118277024	11	118295863	2512	407410	429373	insertion	1	-1	homozygous	1	684	3123	94.7	not_applicable	LOC100131626;ATP5L	UBE4A	7099	yes
FALSE	2081	11	120079563	11	120086737	11	119950272	11	119957446	22492	449993	454120	deletion	1	-1	heterozygous	1	-1	3047	9.3	not_applicable	-	TRIM29	24549	yes
FALSE	2084	11	122987396	11	122992003	11	122858104	11	122862711	15850	91591.1	97346.4	insertion	1	-1	homozygous	1	-1	1148	64.2	not_applicable	-	BSX	5726	yes
FALSE	2089	11	128865816	11	128871418	11	128735711	11	128741313	1451	196633	204552	insertion	1	-1	homozygous	1	687	2317	96.7	not_applicable	-	KCNJ5	20000	yes
FALSE	2091	11	128865816	11	128871418	11	128735711	11	128741313	1452	196633	204552	insertion	1	-1	homozygous	1	687	2317	96.7	not_applicable	-	KCNJ5	20000	yes
FALSE	2093	11	128929492	11	128937269	11	128799387	11	128807164	1452	262849	272575	insertion	1	-1	heterozygous	1	-1	1950	18.5	not_applicable	TP53AIP1	JC172208	7344	yes
FALSE	2094	11	131679214	11	131682401	11	131549108	11	131552295	23762	195241	200014	insertion	1	-1	homozygous	1	689	1586	90.7	not_applicable	-	AP003025.2	138348	yes
FALSE	2095	11	131679214	11	131682401	11	131549108	11	131552295	23761	195241	200014	insertion	1	-1	homozygous	1	689	1586	90.7	not_applicable	-	AP003025.2	138348	yes
FALSE	2099	12	144345	12	163238	12	253511	12	272405	10151	264464	285030	insertion	1	-1	heterozygous	1	-1	1673	56.3	not_applicable	IQSEC3;RP11-598F7.4	JC172329	5280.5	yes
FALSE	2100	12	165457	12	169529	12	274623	12	278695	10152	258463	264343	insertion	1	-1	heterozygous	1	-1	1809	58.9	not_applicable	IQSEC3;JC172329	RP11-598F7.4	16292	yes
FALSE	2101	12	754178	12	792204	12	863344	12	901370	13711	327159	357332	deletion	1	-1	homozygous	1	690	7854	10.6	not_applicable	WNK1;U4atac	NINJ2	90590	yes
FALSE	2102	12	754178	12	792204	12	863344	12	901370	13712	327159	357332	deletion	1	-1	homozygous	1	690	7854	10.6	not_applicable	WNK1;U4atac	NINJ2	90590	yes
FALSE	2103	12	1072349	12	1100583	12	1181515	12	1209749	3381	215169	245158	insertion	1	-1	heterozygous	1	-1	1754	7.3	not_applicable	ERC1	RAD52	122653	yes
FALSE	2104	12	2214141	12	2215778	12	2323307	12	2324944	16582	148172	151045	insertion	1	-1	heterozygous	1	-1	1235	33.1	not_applicable	CACNA1C	CACNA1C-AS4	4759	yes
FALSE	2105	12	2519940	12	2522127	12	2629106	12	2631293	4231	517020	520358	insertion	1	-1	homozygous	1	691	1151	69.5	not_applicable	CACNA1C	Mir_584	79141	yes
FALSE	2106	12	2536171	12	2543726	12	2645337	12	2652892	4231	493627	502990	insertion	1	-1	homozygous	1	692	1809	84.8	not_applicable	CACNA1C	Mir_584	57542	yes
FALSE	2108	12	2519940	12	2522127	12	2629106	12	2631293	4232	517020	520358	insertion	1	-1	homozygous	1	691	1151	69.5	not_applicable	CACNA1C	Mir_584	79141	yes
FALSE	2109	12	2536171	12	2543726	12	2645337	12	2652892	4232	493627	502990	insertion	1	-1	homozygous	1	692	1809	84.8	not_applicable	CACNA1C	Mir_584	57542	yes
FALSE	2111	12	5.90854e+06	12	5.93484e+06	12	6017702	12	6044007	11891	60020.6	89115.8	insertion	1	-1	heterozygous	1	-1	2790	78.1	not_applicable	ANO2	VWF	14033.5	yes
FALSE	2112	12	6134301	12	6140344	12	6243467	12	6249510	14491	251391	260005	insertion	1	-1	heterozygous	1	-1	2572	49	not_applicable	-	DQ596630	2367	yes
FALSE	2113	12	6299588	12	6307290	12	6408754	12	6416456	14491	82093.3	91670.1	insertion	1	-1	homozygous	1	694	1875	91.4	not_applicable	-	PLEKHG6	3146	yes
FALSE	2114	12	6299588	12	6307290	12	6408754	12	6416456	14492	82093.3	91670.1	insertion	1	-1	homozygous	1	694	1875	91.4	not_applicable	-	PLEKHG6	3146	yes
FALSE	2115	12	6890991	12	6899766	12	7000155	12	7008930	13640	265855	276010	insertion	1	-1	homozygous	1	-1	1380	77.5	not_applicable	-	LRRC23	4967	yes
FALSE	2116	12	6955355	12	6.95669e+06	12	7064518	12	7065856	13640	205844	209767	insertion	1	-1	homozygous	1	-1	2586	94.7	not_applicable	PTPN6	MIR200C	7006.5	yes
FALSE	2118	12	10192159	12	10200210	12	10344758	12	10352809	811	1.6417e+06	1.65226e+06	insertion	1	-1	heterozygous	1	-1	2508	3.3	not_applicable	-	TMEM52B	356	yes
FALSE	2120	12	10575037	12	10581249	12	10727636	12	10733848	811	1274526	1.28274e+06	insertion	1	-1	homozygous	1	696	2004	82.8	not_applicable	-	KLRAP1	7229	yes
FALSE	2124	12	10394564	12	10461803	12	10547163	12	10614402	812	1.39539e+06	1.44715e+06	deletion	1	-1	homozygous	1	695	15479	16.6	not_applicable	AK096314;KLRC4;KLRC3;KLRC1	KLRK1	4511	yes
FALSE	2125	12	10575037	12	10581249	12	10727636	12	10733848	812	1274526	1.28274e+06	insertion	1	-1	homozygous	1	696	2004	82.8	not_applicable	-	KLRAP1	7229	yes
FALSE	2130	12	14169936	12	14183446	12	14322870	12	14336380	4871	860884	877237	insertion	1	-1	homozygous	1	699	2842	61.6	not_applicable	-	DQ596630	137311	yes
FALSE	2131	12	14169936	12	14183446	12	14322870	12	14336380	4872	860884	877237	insertion	1	-1	homozygous	1	699	2842	61.6	not_applicable	-	DQ596630	137311	yes
FALSE	2134	12	15862705	12	15883364	12	16015639	12	16036298	192	2.94529e+06	2.96299e+06	deletion	1	-1	heterozygous	1	-1	2959	8.6	not_applicable	STRAP	DERA	27888	yes
FALSE	2136	12	22415799	12	22431905	12	22568733	12	22584839	12991	126834	136350	deletion	1	-1	homozygous	1	701	6590	87.4	not_applicable	-	C2CD5	16641	yes
FALSE	2137	12	22415799	12	22431905	12	22568733	12	22584839	12992	126834	136350	deletion	1	-1	homozygous	1	701	6590	87.4	not_applicable	-	C2CD5	16641	yes
FALSE	2138	12	25345799	12	25358433	12	25498733	12	25511367	841	1.05995e+06	1.0738e+06	insertion	1	-1	homozygous	1	702	1222	92.7	not_applicable	-	DQ571358	11483	yes
FALSE	2139	12	24564214	12	24573169	12	24717148	12	24726103	842	1.8463e+06	1.85289e+06	deletion	1	-1	heterozygous	1	-1	2366	0	not_applicable	LINC00477	DQ578550	100469	yes
FALSE	2140	12	25345799	12	25358433	12	25498733	12	25511367	842	1.05874e+06	1.0726e+06	insertion	1	-1	homozygous	1	702	1222	92.7	not_applicable	-	DQ571358	11483	yes
FALSE	2141	12	25345799	12	25358433	12	25498733	12	25511367	32980	38071.7	52033.6	insertion	1	-1	homozygous	1	702	1328	91.4	not_applicable	-	DQ571358	11483	yes
FALSE	2142	12	28062106	12	28082859	12	28215039	12	28235792	30142	1.83412e+06	1.86085e+06	insertion	1	-1	heterozygous	1	-1	5979	52.3	not_applicable	-	JC172092	83438	yes
FALSE	2143	12	30343840	12	30355052	12	30496773	12	30507985	791	1.72961e+06	1743586	insertion	1	-1	homozygous	1	703	2763	47	not_applicable	DQ587130	DQ593458	71270	yes
FALSE	2144	12	30343840	12	30355052	12	30496773	12	30507985	792	1.72961e+06	1743586	insertion	1	-1	homozygous	1	703	2763	47	not_applicable	DQ587130	DQ593458	71270	yes
FALSE	2146	12	40144059	12	40149705	12	40537861	12	40543507	25601	1.57104e+06	1.579e+06	insertion	1	-1	homozygous	1	706	2318	76.8	not_applicable	-	JC172208	16105	yes
FALSE	2147	12	40500913	12	40513773	12	40894715	12	40907575	25601	1.92817e+06	1.94738e+06	insertion	1	-1	heterozygous	1	707	6349	60.3	not_applicable	MUC19	DQ580701	107393	yes
FALSE	2148	12	40144059	12	40149705	12	40537861	12	40543507	25602	1.57104e+06	1.579e+06	insertion	1	-1	homozygous	1	706	2318	76.8	not_applicable	-	JC172208	16105	yes
FALSE	2149	12	40500913	12	40513773	12	40894715	12	40907575	33170	113507	133047	insertion	1	-1	heterozygous	1	707	6681	59.6	not_applicable	MUC19	DQ580701	107393	yes
TRUE	2150	12	41444988	12	47273104	12	41838790	12	47666887	24690	231835	204667	translocation_intrachr	0.88	-1	heterozygous	1	-1	-1	0	pass	PDZRN4	DQ580986	11264	yes
FALSE	2151	12	4.35716e+07	12	43594079	12	43965412	12	43987882	4370	595087	615193	deletion	1	-1	homozygous	1	-1	2365	73.5	not_applicable	-	ADAMTS20	19688.5	yes
FALSE	2152	12	4.55067e+07	12	4.55182e+07	12	45900485	12	45911975	27861	1.45759e+06	1461997	deletion	1	-1	homozygous	1	708	7078	30.5	not_applicable	-	DQ587130	25493.5	yes
FALSE	2153	12	45507445	12	4.55182e+07	12	45901228	12	45911975	27862	1.45759e+06	1461997	deletion	1	-1	homozygous	1	708	6334	30.5	not_applicable	-	DQ587130	26237	yes
FALSE	2162	12	58074483	12	58076955	12	58468266	12	58470738	24431	1.86833e+06	1.87967e+06	insertion	1	-1	homozygous	1	711	8864	96.7	not_applicable	-	DQ580215	14293	yes
FALSE	2163	12	58632116	12	58635796	12	59025898	12	59029578	24431	1308740	1.315e+06	insertion	1	-1	homozygous	1	712	2575	55.6	not_applicable	AK093124	DQ593458	18072	yes
FALSE	2164	12	58074483	12	58076955	12	58468266	12	58470738	24432	1.89025e+06	1.90159e+06	insertion	1	-1	homozygous	1	711	8864	96.7	not_applicable	-	DQ580215	14293	yes
FALSE	2165	12	58632116	12	58635796	12	59025898	12	59029578	24432	1.33066e+06	1.33691e+06	insertion	1	-1	homozygous	1	712	2576	55.6	not_applicable	AK093124	DQ593458	18072	yes
TRUE	2167	12	65500763	20	14578108	12	65894543	20	14558754	23602	180872	378336	translocation_interchr	0	-1	unknown	-1	713	-1	0	pass	MACROD2;MACROD2-IT1	DQ593458	16822	yes
FALSE	2168	12	66130140	12	66156275	12	66523920	12	66550055	14041	42781.5	66623.2	deletion	0.99	-1	heterozygous	1	-1	2293	31.1	not_applicable	LLPH;DQ580663;DQ588544;DQ601422;TMBIM4	IRAK3	32923	yes
TRUE	2169	12	68713897	15	84922429	12	69107677	15	85465660	31721	338225	822003	translocation_interchr	0	-1	heterozygous	1	714	-1	0	pass	NUP107;SLC28A1	RP11-637A17.2	27039	yes
TRUE	2170	12	68713897	15	84922429	12	69107677	15	85465660	31722	338225	821682	translocation_interchr	0	-1	heterozygous	1	714	-1	0	pass	NUP107;SLC28A1	RP11-637A17.2	27039	yes
TRUE	2171	12	69054440	12	92633869	12	69448220	12	93027645	28991	1.83852e+06	1.84483e+06	translocation_intrachr	0.01	-1	unknown	-1	715	-1	0	pass	-	DQ580215	28360	yes
TRUE	2172	12	69054440	12	92633869	12	69448220	12	93027645	28992	1.44124e+06	1.44755e+06	translocation_intrachr	0	-1	unknown	-1	715	-1	0	pass	-	DQ580215	28360	yes
TRUE	2173	12	69054440	12	92633869	12	69448220	12	93027645	32710	67370.8	60983.1	translocation_intrachr	0.29	-1	unknown	-1	715	-1	0	pass	-	DQ580215	28360	yes
TRUE	2174	12	68986513	12	94946150	12	69380293	12	95339926	24981	739471	407070	translocation_intrachr	0	-1	unknown	-1	715	-1	0	pass	-	L13714	4323	yes
TRUE	2175	12	68986513	12	94946150	12	69380293	12	95339926	24982	739471	407070	translocation_intrachr	0	-1	unknown	-1	715	-1	0	pass	-	L13714	4323	yes
TRUE	2176	12	69145205	12	95208898	12	69538985	12	95602674	28902	190837	145805	translocation_intrachr	0.09	-1	unknown	-1	715	-1	0	pass	FGD6	VEZT	8848	yes
TRUE	2177	12	69145205	12	95208898	12	69538985	12	95602674	58662	305803	351082	translocation_intrachr	0.2	-1	unknown	-1	715	-1	0	pass	FGD6	VEZT	8848	yes
TRUE	2178	12	69145205	12	83872617	12	69538985	12	84266396	24581	1.18985e+06	1.52898e+06	translocation_intrachr	0	-1	unknown	-1	715	-1	0	pass	-	DQ573309	57814	yes
TRUE	2179	12	69145205	12	95208898	12	69538985	12	95602674	24582	1.18985e+06	1.23499e+06	translocation_intrachr	0	-1	unknown	-1	715	-1	0	pass	FGD6	VEZT	8848	yes
TRUE	2180	12	70190654	12	70223110	12	70584434	12	70616890	29021	2.22833e+06	2.258e+06	deletion	0.99	-1	homozygous	1	716	2778	49	not_applicable	DQ586451	CNOT2	19884	yes
TRUE	2181	12	70190654	12	70223110	12	70584434	12	70616890	29022	2.22833e+06	2.258e+06	deletion	0.99	-1	homozygous	1	716	2778	49	not_applicable	DQ586451	CNOT2	19884	yes
TRUE	2182	12	70371964	20	14466020	12	70765744	20	14446666	31661	646979	646979	translocation_interchr	0.01	-1	unknown	-1	717	-1	0	pass	KCNMB4;MACROD2	JC172250	5865	yes
TRUE	2183	12	70371964	20	14466020	12	70765744	20	14446666	31661	1004945	1004945	translocation_interchr	0.01	-1	unknown	-1	717	-1	0	pass	KCNMB4;MACROD2	JC172250	5865	yes
TRUE	2184	12	70371964	20	14466020	12	70765744	20	14446666	31662	646979	646979	translocation_interchr	0.01	-1	unknown	-1	717	-1	0	pass	KCNMB4;MACROD2	JC172250	5865	yes
TRUE	2185	12	70371964	20	14466020	12	70765744	20	14446666	31662	1004945	1004945	translocation_interchr	0.02	-1	unknown	-1	717	-1	0	pass	KCNMB4;MACROD2	JC172250	5865	yes
FALSE	2186	12	70933732	12	70963372	12	71327512	12	71357152	24662	318782	362042	insertion	1	-1	homozygous	1	718	13620	30.5	not_applicable	-	PTPRR	12929	yes
FALSE	2187	12	70933732	12	70963372	12	71327512	12	71357152	24661	135698	178958	insertion	1	-1	homozygous	1	718	13620	30.5	not_applicable	-	PTPRR	12929	yes
FALSE	2189	12	76112911	12	76135035	12	76506691	12	76528815	112	1829203	1.85419e+06	insertion	1	-1	heterozygous	1	719	2867	92.7	not_applicable	-	NAP1L1	27954	yes
FALSE	2190	12	76112911	12	76135035	12	76506691	12	76528815	111	1.82554e+06	1.85053e+06	insertion	1	-1	heterozygous	1	719	2867	92.7	not_applicable	-	NAP1L1	27954	yes
TRUE	2191	12	75263951	13	65562492	12	75657731	13	66136624	521	477816	540934	translocation_interchr	0.01	-1	heterozygous	1	720	-1	0	pass	-	CAPS2	12028	yes
TRUE	2192	12	75263951	13	65562492	12	75657731	13	66136624	522	463572	526690	translocation_interchr	0	-1	heterozygous	1	720	-1	0	pass	-	CAPS2	12028	yes
FALSE	2193	12	76118227	12	76135035	12	76512007	12	76528815	33830	164752	184493	insertion	1	-1	heterozygous	2	719	2933	92.7	not_applicable	-	NAP1L1	33270	yes
FALSE	2194	12	78605413	12	78610118	12	78999193	12	79003898	6132	412325	422844	insertion	1	-1	heterozygous	1	-1	5814	44.4	not_applicable	-	BC047615	113900	yes
TRUE	2195	12	7.84769e+07	13	88672617	12	78870676	13	89324871	29021	664294	510002	translocation_interchr	0	-1	heterozygous	1	721	-1	0	pass	-	BC047615	12983.5	yes
TRUE	2196	12	78596850	20	1472920	12	78990630	20	1453565	29021	784251	1.03589e+06	translocation_interchr	0	-1	heterozygous	1	722	-1	0	pass	-	SIRPB2	1671	yes
TRUE	2197	12	7.84769e+07	13	88672617	12	78870676	13	89324871	29022	664294	510002	translocation_interchr	0	-1	heterozygous	1	721	-1	0	pass	-	BC047615	12983.5	yes
TRUE	2198	12	78596850	20	1472920	12	78990630	20	1453565	29022	784251	1.03589e+06	translocation_interchr	0	-1	heterozygous	1	722	-1	0	pass	-	SIRPB2	1671	yes
TRUE	2200	12	83721254	12	92470526	12	84115033	12	92864302	23121	1.13063e+06	761076	translocation_intrachr	0	-1	heterozygous	1	723	-1	0	pass	BC062291	DQ596939	25236	yes
TRUE	2201	12	83721254	12	92470526	12	84115033	12	92864302	57142	1.13063e+06	761076	translocation_intrachr	0	-1	heterozygous	1	723	-1	0	pass	BC062291	DQ596939	25236	yes
TRUE	2202	12	83872617	12	95052778	12	84266396	12	95446554	24582	1.52181e+06	1.39238e+06	translocation_intrachr	0	-1	heterozygous	1	-1	-1	0	fail	NR2C1	DQ578550	2192	yes
TRUE	2203	12	84072835	21	41567898	12	84466614	21	42939825	24061	639931	1.01844e+06	translocation_interchr	0	-1	unknown	-1	80	-1	0	pass	-	L13714	187	yes
TRUE	2204	12	84072835	21	41567898	12	84466614	21	42939825	24062	884914	1.26342e+06	translocation_interchr	0	-1	unknown	-1	80	-1	0	pass	-	L13714	187	yes
FALSE	2205	12	86246134	12	86263158	12	86639912	12	86656936	28301	3.57193e+06	3.59612e+06	insertion	1	-1	homozygous	1	724	7169	79.5	not_applicable	MGAT4C	L13714	33411	yes
FALSE	2207	12	86246134	12	86263158	12	86639912	12	86656936	28302	3.57193e+06	3.59612e+06	insertion	1	-1	homozygous	1	724	7169	79.5	not_applicable	MGAT4C	L13714	33411	yes
TRUE	2211	12	92713599	21	26262117	12	93107375	21	27634436	57142	517634	351714	translocation_interchr	0	-1	heterozygous	1	-1	-1	0	pass	-	C12orf74	5051	yes
FALSE	2212	12	92910660	12	92917650	12	93304436	12	93311426	991	1.70308e+06	1713527	insertion	1	-1	homozygous	1	726	3458	51.7	not_applicable	EEA1	RP11-486A14.2	86108	yes
FALSE	2213	12	92910660	12	92917650	12	93304436	12	93311426	992	1.70308e+06	1713527	insertion	1	-1	homozygous	1	726	3458	51.7	not_applicable	EEA1	RP11-486A14.2	86108	yes
TRUE	2215	12	95105377	15	98275944	12	95499153	15	98819173	31661	101449	132490	translocation_interchr	0.01	-1	heterozygous	1	727	-1	0	pass	FGD6	NR2C1	31750	yes
TRUE	2216	12	95105377	15	98275944	12	95499153	15	98819173	31662	101449	132490	translocation_interchr	0.01	-1	heterozygous	1	727	-1	0	pass	FGD6	NR2C1	31750	yes
FALSE	2218	12	95947207	12	95950360	12	96340985	12	96344138	641	1.69004e+06	1.69211e+06	deletion	0.98	-1	heterozygous	1	-1	1083	15.2	not_applicable	AMDHD1;DQ586320	DQ601422	25	yes
FALSE	2219	12	95828907	12	95855241	12	96222685	12	96249019	642	1.78466e+06	1.80848e+06	deletion	0.99	-1	heterozygous	1	-1	2517	78.8	not_applicable	DQ578550	SNRPF	3690	yes
FALSE	2220	12	98274769	12	98296307	12	98668547	12	98690085	5612	219397	238571	deletion	1	-1	heterozygous	1	-1	2364	19.2	not_applicable	-	SLC9A7P1	157534	yes
FALSE	2223	12	105675061	12	105680779	12	106068839	12	106074557	23271	649617	656696	insertion	1	-1	homozygous	1	729	1362	98	not_applicable	-	CASC18	23424	yes
FALSE	2224	12	105675061	12	105680779	12	106068839	12	106074557	23272	658583	665662	insertion	1	-1	homozygous	1	729	1362	98	not_applicable	-	CASC18	23424	yes
FALSE	2225	12	107912984	12	107916022	12	108306761	12	108309799	5221	935266	942182	insertion	1	-1	homozygous	1	730	3879	74.2	not_applicable	-	LOC728739	9214	yes
FALSE	2226	12	107912984	12	107916022	12	108306761	12	108309799	5222	935266	942182	insertion	1	-1	homozygous	1	730	3879	74.2	not_applicable	-	LOC728739	9214	yes
FALSE	2227	12	108577946	12	108582891	12	108971722	12	108976667	1111	567722	577300	insertion	1	-1	homozygous	1	731	4633	94	not_applicable	-	TMEM119	6955	yes
FALSE	2229	12	108577946	12	108582891	12	108971722	12	108976667	1112	567722	577300	insertion	1	-1	homozygous	1	731	4633	94	not_applicable	-	TMEM119	6955	yes
FALSE	2230	12	110167122	12	110178950	12	110604927	12	110616755	1581	612044	625832	insertion	1	-1	homozygous	1	732	1961	97.4	not_applicable	IFT81;DQ580663;DQ591044	C12orf76	93489	yes
FALSE	2232	12	110167122	12	110178950	12	110604927	12	110616755	1582	612044	625832	insertion	1	-1	homozygous	1	732	1961	97.4	not_applicable	IFT81;DQ580663;DQ591044	C12orf76	93489	yes
FALSE	2235	12	117184123	12	117208237	12	117621928	12	117646042	8652	434971	456514	deletion	1	-1	heterozygous	1	-1	2570	11.3	not_applicable	FBXO21;NOS1	TESC	84678	yes
FALSE	2236	12	117743259	12	117755196	12	118181064	12	118193001	361	2.45461e+06	2.47032e+06	insertion	1	-1	heterozygous	1	-1	3775	35.8	not_applicable	KSR2	DQ571824	2489	yes
FALSE	2237	12	118479733	12	118493200	12	118917538	12	118931005	361	1.72379e+06	1.72834e+06	deletion	1	-1	heterozygous	1	-1	8916	0	not_applicable	-	SUDS3	61699	yes
FALSE	2239	12	121512946	12	121515846	12	121950749	12	121953649	27321	1.30453e+06	1.30925e+06	insertion	1	-1	homozygous	1	734	1816	94.7	not_applicable	KDM2B	MIR7107	68595	yes
FALSE	2241	12	121512946	12	121515846	12	121950749	12	121953649	27322	1.30453e+06	1.30925e+06	insertion	1	-1	homozygous	1	734	1816	94.7	not_applicable	KDM2B	MIR7107	68595	yes
FALSE	2242	12	122894623	12	122903404	12	123379170	12	123387951	1701	1.22212e+06	1.23233e+06	insertion	1	-1	homozygous	1	735	1432	97.4	not_applicable	VPS37B	ABCB9	25588	yes
FALSE	2243	12	123430524	12	123474288	12	123915071	12	123958835	1701	646889	693408	insertion	0.99	-1	homozygous	1	736	2755	97.4	not_applicable	RILPL2;SNRNP35;RILPL1	DQ600853	16584	yes
FALSE	2244	12	123908421	12	123931125	12	124392968	12	124415672	1701	187386	212403	insertion	0.99	-1	heterozygous	1	-1	2313	93.4	not_applicable	DNAH10	CCDC92	5283	yes
FALSE	2245	12	122894623	12	122903404	12	123379170	12	123387951	1702	1.21977e+06	1.22998e+06	insertion	1	-1	homozygous	1	735	1431	97.4	not_applicable	VPS37B	ABCB9	25588	yes
FALSE	2246	12	123430524	12	123474288	12	123915071	12	123958835	1702	644544	691063	insertion	0.99	-1	homozygous	1	736	2755	97.4	not_applicable	RILPL2;SNRNP35;RILPL1	DQ600853	16584	yes
FALSE	2247	12	124435606	12	124441224	12	124920152	12	124925770	23981	2.24536e+06	2.253e+06	insertion	1	-1	homozygous	1	737	2023	99.3	not_applicable	NCOR2	BC017209	42473	yes
FALSE	2248	12	124995587	12	125003304	12	125480133	12	125487850	23981	1.67762e+06	1.68778e+06	insertion	1	-1	homozygous	1	738	2443	99.3	not_applicable	BRI3BP	DHX37	6467	yes
FALSE	2249	12	125312911	12	125325027	12	125797457	12	125809573	23981	1351187	1.36662e+06	insertion	1	-1	homozygous	1	739	3313	69.5	not_applicable	-	TMEM132B	1589	yes
FALSE	2251	12	126311454	12	126317891	12	126796000	12	126802437	23981	359900	365040	deletion	0.98	-1	heterozygous	1	-1	1296	4.6	not_applicable	-	DQ587130	24001	yes
FALSE	2252	12	124435606	12	124441224	12	124920152	12	124925770	23982	2.24536e+06	2.253e+06	insertion	1	-1	homozygous	1	737	2023	99.3	not_applicable	NCOR2	BC017209	42473	yes
FALSE	2253	12	124995587	12	125003304	12	125480133	12	125487850	23982	1.67762e+06	1.68778e+06	insertion	1	-1	homozygous	1	738	2443	99.3	not_applicable	BRI3BP	DHX37	6467	yes
FALSE	2254	12	125312911	12	125325027	12	125797457	12	125809573	23982	1351187	1.36662e+06	insertion	1	-1	homozygous	1	739	3313	69.5	not_applicable	-	TMEM132B	1589	yes
FALSE	2255	12	1.26823e+08	12	126843639	12	127307810	12	127328185	1831	145683	168675	insertion	1	-1	homozygous	1	740	2617	92.7	not_applicable	-	RP11-983C2.2	25855	yes
FALSE	2256	12	127149743	12	127166801	12	127634288	12	127651346	1831	475215	506686	insertion	1	-1	homozygous	1	741	14414	70.2	not_applicable	DQ580854	RP11-575F12.1	89347	yes
FALSE	2257	12	1.27553e+08	12	127571983	12	128037117	12	128056528	1831	893608	914434	insertion	1	-1	heterozygous	1	-1	1414	93.4	not_applicable	-	JC172208	25498.5	yes
FALSE	2258	12	1.26823e+08	12	126843639	12	127307810	12	127328185	1832	145683	168675	insertion	1	-1	homozygous	1	740	2617	92.7	not_applicable	-	RP11-983C2.2	25855	yes
FALSE	2259	12	127149743	12	127166801	12	127634288	12	127651346	1832	475215	506686	insertion	1	-1	homozygous	1	741	14414	70.2	not_applicable	DQ580854	RP11-575F12.1	89347	yes
FALSE	2260	12	130384634	12	130414607	12	130869179	12	130899152	23181	1.64743e+06	1.68103e+06	insertion	1	-1	homozygous	1	742	3626	62.9	not_applicable	RIMBP2	PIWIL1	12303	yes
FALSE	2261	12	130645446	12	130650386	12	131129991	12	131134931	23181	1912797	1.92324e+06	insertion	1	-1	heterozygous	1	-1	5505	19.2	not_applicable	-	HV555621	88822	yes
FALSE	2263	12	1.31575e+08	12	131586492	12	132059337	12	132071037	23181	2852273	2.86699e+06	insertion	1	-1	homozygous	1	743	3012	37.1	not_applicable	-	DQ578393	90810.5	yes
FALSE	2264	12	132147379	12	132155124	12	132631924	12	132639669	23181	3.43823e+06	3.44445e+06	deletion	0.98	-1	heterozygous	1	744	1524	4	not_applicable	NOC4L	DDX51	3045	yes
FALSE	2265	12	129811645	12	129831720	12	130296190	12	130316265	23182	1.072e+06	1.09328e+06	insertion	1	-1	heterozygous	1	-1	1203	33.1	not_applicable	TMEM132D	DQ571825	22184	yes
FALSE	2266	12	129840194	12	129866714	12	130324739	12	130351259	23182	1.1019e+06	1.12681e+06	deletion	0.99	-1	heterozygous	1	-1	1613	25.2	not_applicable	TMEM132D;JC172329	DQ571825	50733	yes
FALSE	2268	12	130384634	12	130414607	12	130869179	12	130899152	23182	1.64555e+06	1679144	insertion	1	-1	homozygous	1	742	3626	62.9	not_applicable	RIMBP2	PIWIL1	12303	yes
FALSE	2269	12	1.31575e+08	12	131586492	12	132059337	12	132071037	23182	2.84276e+06	2857474	insertion	1	-1	homozygous	1	743	3013	37.1	not_applicable	-	DQ578393	90810.5	yes
FALSE	2270	12	132147379	12	132155124	12	132631924	12	132639669	23182	3.42872e+06	3.44112e+06	insertion	1	-1	heterozygous	2	744	4656	26.5	not_applicable	NOC4L	DDX51	3045	yes
FALSE	2272	12	132687748	12	132695953	12	133264334	12	133272539	23662	173568	180190	deletion	0.98	-1	heterozygous	1	-1	1583	33.1	not_applicable	PXMP2	POLE	225	yes
FALSE	2274	13	21724343	13	21730375	13	22298482	13	22304514	12892	109000	117749	insertion	1	-1	homozygous	1	745	2717	96	not_applicable	-	FGF9	19843	yes
FALSE	2275	13	21724343	13	21730375	13	22298482	13	22304514	46911	109000	117749	insertion	1	-1	homozygous	1	745	2717	96	not_applicable	-	FGF9	19843	yes
FALSE	2284	13	25799617	13	25821741	13	26373755	13	26395879	7092	1.04294e+06	1.0692e+06	insertion	1	-1	homozygous	1	750	4133	91.4	not_applicable	ATP8A2	JC172092	8931	yes
FALSE	2285	13	25799617	13	25821741	13	26373755	13	26395879	7091	1.04294e+06	1.0692e+06	insertion	1	-1	homozygous	1	750	4133	91.4	not_applicable	ATP8A2	JC172092	8931	yes
FALSE	2286	13	27060305	13	27066359	13	27634442	13	27640496	23341	547228	556891	insertion	1	-1	homozygous	1	751	3608	32.5	not_applicable	USP12	USP12-AS2	105900	yes
FALSE	2287	13	27060305	13	27066359	13	27634442	13	27640496	23342	547228	556891	insertion	1	-1	homozygous	1	751	3608	32.5	not_applicable	USP12	USP12-AS2	105900	yes
FALSE	2292	13	38955355	13	38958112	13	39529492	13	39532249	3240	1.63576e+06	1.64092e+06	insertion	1	-1	homozygous	1	-1	2402	93.4	not_applicable	-	STOML3	7813	yes
FALSE	2294	13	42962299	13	42973603	13	43536435	13	43547739	4961	1.75974e+06	1769373	deletion	0.98	-1	homozygous	1	752	1670	66.9	not_applicable	EPSTI1;DQ580663;DQ588547;DQ601422;DQ586320	DNAJC15	49623	yes
FALSE	2295	13	42962299	13	42973603	13	43536435	13	43547739	4962	1.75974e+06	1769373	deletion	0.98	-1	homozygous	1	752	1670	66.9	not_applicable	EPSTI1;DQ580663;DQ588547;DQ601422;DQ586320	DNAJC15	49623	yes
FALSE	2297	13	43490644	13	43499078	13	44064780	13	44073214	6780	195733	208044	insertion	1	-1	homozygous	1	-1	3878	10.6	not_applicable	ENOX1	CCDC122	337275	yes
FALSE	2301	13	48907305	13	48913103	13	49481441	13	49487239	20411	334422	341500	insertion	1	-1	homozygous	1	754	1281	72.2	not_applicable	-	FNDC3A	63506	yes
FALSE	2302	13	48951298	13	4.89753e+07	13	49525434	13	49549442	20411	275090	296319	deletion	1	-1	homozygous	1	755	2778	34.4	not_applicable	-	FNDC3A	1303.5	yes
FALSE	2303	13	48907305	13	48913103	13	49481441	13	49487239	20412	334422	341500	insertion	1	-1	homozygous	1	754	1281	72.2	not_applicable	-	FNDC3A	63506	yes
FALSE	2304	13	48951298	13	4.89753e+07	13	49525434	13	49549442	20412	275090	296319	deletion	1	-1	homozygous	1	755	2778	34.4	not_applicable	-	FNDC3A	1303.5	yes
FALSE	2306	13	50474543	13	5.05072e+07	13	51048679	13	51081307	8992	1.22409e+06	1.25063e+06	deletion	1	-1	homozygous	1	757	6088	78.1	not_applicable	-	DLEU7	205452	yes
FALSE	2309	13	50474543	13	5.05072e+07	13	51048679	13	51081307	8991	1.22409e+06	1.25063e+06	deletion	1	-1	homozygous	1	757	6088	78.1	not_applicable	-	DLEU7	205452	yes
FALSE	2312	13	58504698	13	58514350	13	59078832	13	59088484	25730	315815	323512	deletion	0.98	-1	homozygous	1	-1	1955	9.9	not_applicable	-	DQ596939	589	yes
FALSE	2313	13	61160069	13	61163610	13	61734203	13	61737744	20682	218453	223324	insertion	1	-1	homozygous	1	-1	1330	26.5	not_applicable	-	MIR3169	36188	yes
FALSE	2314	13	61610345	13	61637064	13	62184478	13	62211197	13341	226014	245865	deletion	1	-1	homozygous	1	759	6868	0	not_applicable	-	JC172329	123276	yes
FALSE	2315	13	61610345	13	61637064	13	62184478	13	62211197	13342	185144	204995	deletion	1	-1	homozygous	1	759	6868	0	not_applicable	-	JC172329	123276	yes
FALSE	2317	13	63375243	13	6.34059e+07	13	63949376	13	63980025	28002	918804	953129	insertion	1	-1	homozygous	1	760	3676	29.8	not_applicable	-	DQ596630	68930	yes
FALSE	2318	13	63375243	13	6.34059e+07	13	63949376	13	63980025	28001	205914	240238	insertion	1	-1	homozygous	1	760	3677	29.8	not_applicable	-	DQ596630	68930	yes
FALSE	2319	13	68075682	13	6.80847e+07	13	68649814	13	68658850	20720	50289.1	60823.1	insertion	1	-1	homozygous	1	-1	1499	83.4	not_applicable	-	JC172250	14318.5	yes
TRUE	2320	13	68821183	13	74166838	13	69395315	13	74740975	28131	1.39929e+06	1.29764e+06	translocation_intrachr	0	-1	heterozygous	1	761	-1	0	pass	-	Mir_340	25699	yes
TRUE	2321	13	68821183	13	74166838	13	69395315	13	74740975	28132	1.39929e+06	1.29764e+06	translocation_intrachr	0	-1	heterozygous	1	761	-1	0	pass	-	Mir_340	25699	yes
FALSE	2322	13	71890045	13	71913299	13	72464183	13	72487437	9280	832495	852372	deletion	1	-1	homozygous	1	-1	3377	37.1	not_applicable	-	DACH1	22854	yes
FALSE	2323	13	72262197	13	72277798	13	72836335	13	72851936	9280	472931	484669	deletion	1	-1	homozygous	1	-1	3863	49	not_applicable	-	DQ572566	44883	yes
FALSE	2324	13	74802890	13	74816002	13	75377027	13	75390139	25662	1.74086e+06	1.75635e+06	insertion	1	-1	homozygous	1	762	2379	97.4	not_applicable	-	DQ587130	78119	yes
FALSE	2325	13	74802890	13	74816002	13	75377027	13	75390139	25661	733941	749432	insertion	1	-1	homozygous	1	762	2379	97.4	not_applicable	-	DQ587130	78119	yes
FALSE	2327	13	78681933	13	78695495	13	79256068	13	79269630	27612	579756	595166	insertion	1	-1	homozygous	1	763	1849	92.1	not_applicable	-	RNF219	22755	yes
FALSE	2328	13	78796021	13	7.88082e+07	13	79370156	13	79382320	27612	695553	706021	deletion	0.98	-1	homozygous	1	764	1695	0	not_applicable	LINC00331	RNF219	136843	yes
FALSE	2329	13	78681933	13	78695495	13	79256068	13	79269630	27611	439967	455378	insertion	1	-1	homozygous	1	763	1848	92.1	not_applicable	-	RNF219	22755	yes
FALSE	2330	13	78796021	13	7.88082e+07	13	79370156	13	79382320	27611	555764	566233	deletion	0.98	-1	homozygous	1	764	1695	0	not_applicable	LINC00331	RNF219	136843	yes
FALSE	2332	13	82586879	13	82603675	13	83161014	13	83177810	30830	360749	371276	deletion	1	-1	homozygous	1	-1	6269	11.3	not_applicable	-	DQ578736	4480	yes
FALSE	2336	13	89648423	13	89686861	13	90300677	13	90339115	28372	362850	405151	insertion	1	-1	homozygous	1	766	3864	61.6	not_applicable	-	LINC00353	84011	yes
FALSE	2337	13	89648423	13	89686861	13	90300677	13	90339115	28371	530904	573205	insertion	1	-1	homozygous	1	766	3864	61.6	not_applicable	-	LINC00353	84011	yes
FALSE	2338	13	97333234	13	97342380	13	97985488	13	97994634	29641	425005	436444	insertion	1	-1	homozygous	1	767	2292	96.7	not_applicable	MBNL2	RAP2A	91841	yes
FALSE	2339	13	97333234	13	97342380	13	97985488	13	97994634	29642	425005	436444	insertion	1	-1	homozygous	1	767	2292	96.7	not_applicable	MBNL2	RAP2A	91841	yes
FALSE	2341	13	98601618	13	98623086	13	99253872	13	99275340	14530	36417	53780.6	deletion	1	-1	homozygous	1	-1	4105	11.9	not_applicable	-	STK24	24468	yes
FALSE	2343	13	100055801	13	100063098	13	100708055	13	100715352	25681	83339.7	92629.8	insertion	1	-1	homozygous	1	768	1993	69.5	not_applicable	-	DQ596630	14962	yes
FALSE	2344	13	100434443	13	100452432	13	101086697	13	101104686	25681	464750	484140	insertion	1	-1	homozygous	1	769	1401	88.1	not_applicable	PCCA	DQ582994	4144	yes
FALSE	2346	13	100055801	13	100063098	13	100708055	13	100715352	25682	83339.7	92629.8	insertion	1	-1	homozygous	1	768	1993	69.5	not_applicable	-	DQ596630	14962	yes
FALSE	2347	13	100434443	13	100452432	13	101086697	13	101104686	25682	464750	484140	insertion	1	-1	homozygous	1	769	1401	88.1	not_applicable	PCCA	DQ582994	4144	yes
FALSE	2350	13	102683336	13	102699087	13	103335686	13	103351437	22152	1.01027e+06	1.02816e+06	insertion	1	-1	homozygous	1	771	2148	88.1	not_applicable	METTL21C;AX747578	TPP2	4164	yes
FALSE	2351	13	102683336	13	102699087	13	103335686	13	103351437	22151	1.01027e+06	1.02816e+06	insertion	1	-1	homozygous	1	771	2148	88.1	not_applicable	METTL21C;AX747578	TPP2	4164	yes
FALSE	2354	13	110378570	13	110387955	13	111030917	13	111040302	4021	478491	489187	insertion	1	-1	homozygous	1	773	1311	70.2	not_applicable	COL4A2	MIR8073	37542	yes
FALSE	2355	13	110378570	13	110387955	13	111030917	13	111040302	4022	424111	434807	insertion	1	-1	homozygous	1	773	1311	70.2	not_applicable	COL4A2	MIR8073	37542	yes
FALSE	2356	13	112275337	13	112327618	13	112929651	13	112981932	11662	470445	527397	insertion	1	-1	homozygous	1	774	4671	31.1	not_applicable	-	SPACA7	48719	yes
FALSE	2357	13	112275337	13	112327618	13	112929651	13	112981932	11661	470445	527397	insertion	1	-1	homozygous	1	774	4671	31.1	not_applicable	-	SPACA7	48719	yes
FALSE	2359	13	113358983	13	113374211	13	114013298	13	114028526	15652	309208	326782	insertion	1	-1	heterozygous	1	776	2347	9.9	not_applicable	GRTP1	LAMP1	35558	yes
FALSE	2361	13	113370806	13	113374211	13	114025121	13	114028526	15651	321857	326782	insertion	1	-1	heterozygous	2	776	1521	11.9	not_applicable	-	GRTP1	6659	yes
FALSE	2362	13	113979265	13	113990347	13	114748676	13	114755823	13220	361061	368477	deletion	1	-1	homozygous	1	-1	3665	94.7	not_applicable	RASA3	AX747653	8857	yes
FALSE	2364	14	20055673	14	20089143	14	20523832	14	20557302	30031	909612	938315	deletion	1	-1	homozygous	1	777	4766	60.9	not_applicable	OR4L1	DQ587130	5554	yes
FALSE	2365	14	20707483	14	20717611	14	21175642	14	21185770	30031	1.55895e+06	1.57154e+06	insertion	1	-1	heterozygous	1	-1	2453	41.1	not_applicable	-	DQ600650	6596	yes
FALSE	2367	14	20055673	14	20089143	14	20523832	14	20557302	30032	929796	958500	deletion	1	-1	homozygous	1	777	4767	60.9	not_applicable	OR4L1	DQ587130	5554	yes
FALSE	2374	14	30344761	14	30358350	14	30813967	14	30827556	8081	950406	961714	deletion	1	-1	homozygous	1	781	2281	0	not_applicable	-	DQ597498	188596	yes
FALSE	2375	14	30344761	14	30358350	14	30813967	14	30827556	8082	950406	961714	deletion	1	-1	homozygous	1	781	2281	0	not_applicable	-	DQ597498	188596	yes
FALSE	2379	14	39625571	14	39633400	14	40094775	14	40102604	8440	261277	267415	deletion	0.98	-1	homozygous	1	-1	1691	45.7	not_applicable	-	DQ589229	115290	yes
FALSE	2380	14	40135816	14	40151437	14	40605020	14	40620641	13651	286849	294681	deletion	1	-1	homozygous	1	783	7789	33.1	not_applicable	-	JC172208	323475	yes
FALSE	2381	14	40135816	14	40151437	14	40605020	14	40620641	13652	286849	294681	deletion	1	-1	homozygous	1	783	7789	33.1	not_applicable	-	JC172208	323475	yes
FALSE	2383	14	48992365	14	49032991	14	49461568	14	49499709	1751	1.14895e+06	1.18708e+06	deletion	0.99	-1	homozygous	1	784	2491	21.2	not_applicable	-	SNORD112	50852	yes
FALSE	2384	14	48992365	14	49032991	14	49461568	14	49499709	1752	1.14895e+06	1.18708e+06	deletion	0.99	-1	homozygous	1	784	2491	21.2	not_applicable	-	SNORD112	50852	yes
FALSE	2385	14	49750735	14	49753405	14	50217453	14	50220123	1752	1.90484e+06	1.9158e+06	insertion	1	-1	heterozygous	1	-1	8289	86.1	not_applicable	KLHDC1	KLHDC2	14664	yes
FALSE	2386	14	50071343	14	50075892	14	50538061	14	50542610	30511	1.1695e+06	1.17249e+06	deletion	0.98	-1	homozygous	1	785	1562	28.5	not_applicable	DQ588547;DQ601422;DQ571320	C14orf183	7759	yes
FALSE	2387	14	50071343	14	50075892	14	50538061	14	50542610	30512	1.1695e+06	1.17249e+06	deletion	0.98	-1	homozygous	1	785	1562	28.5	not_applicable	DQ588547;DQ601422;DQ571320	C14orf183	7759	yes
FALSE	2389	14	58745377	14	58754605	14	59212095	14	59221323	8581	380813	396126	insertion	1	-1	heterozygous	1	-1	6085	13.2	not_applicable	-	JC172329	16597	yes
FALSE	2390	14	6.34927e+07	14	63508179	14	63959413	14	63974897	30962	768348	775166	deletion	1	-1	heterozygous	1	786	8667	0	not_applicable	PPP2R5E	DQ580663	13820	yes
FALSE	2391	14	63481568	14	63508179	14	63948286	14	63974897	30961	597624	615380	deletion	1	-1	heterozygous	2	786	8856	0	not_applicable	PPP2R5E	DQ580663	13820	yes
FALSE	2392	14	64878273	14	64904425	14	65344991	14	65371143	27201	473403	496639	deletion	1	-1	homozygous	1	787	2916	51	not_applicable	DQ578550	RNaseP_nuc	5063	yes
FALSE	2393	14	64878273	14	64904425	14	65344991	14	65371143	27202	471646	494882	deletion	1	-1	homozygous	1	787	2916	51	not_applicable	DQ578550	RNaseP_nuc	5063	yes
FALSE	2394	14	65131079	14	65142712	14	65597797	14	65609430	27202	234122	244015	deletion	0.98	-1	heterozygous	1	-1	1741	23.2	not_applicable	-	MAX	28536	yes
FALSE	2395	14	65789674	14	65801375	14	66256392	14	66268093	28242	2508142	2.52206e+06	insertion	1	-1	homozygous	1	788	2219	98.7	not_applicable	-	FUT8	45554	yes
FALSE	2397	14	65789674	14	65801375	14	66256392	14	66268093	62261	2508142	2.52206e+06	insertion	1	-1	homozygous	1	788	2219	98.7	not_applicable	-	FUT8	45554	yes
FALSE	2399	14	68843994	14	68878757	14	69310711	14	69345474	3432	935350	972325	insertion	0.99	-1	homozygous	1	790	2212	97.4	not_applicable	ACTN1	ZFP36L1	47701	yes
FALSE	2400	14	69027770	14	69034325	14	69494487	14	69501042	3432	775577	786249	insertion	1	-1	heterozygous	1	-1	4116	47.7	not_applicable	-	DCAF5	16595	yes
FALSE	2401	14	69550021	14	69561525	14	70016738	14	70028242	3432	252543	259202	deletion	1	-1	heterozygous	1	-1	4845	14.6	not_applicable	-	CCDC177	8289	yes
FALSE	2402	14	68843994	14	68878757	14	69310711	14	69345474	3431	936520	973495	insertion	0.99	-1	homozygous	1	790	2212	97.4	not_applicable	ACTN1	ZFP36L1	47701	yes
FALSE	2403	14	74469661	14	74475984	14	74936364	14	74942687	25081	1.64089e+06	1.64832e+06	insertion	1	-1	heterozygous	1	-1	1109	98.7	not_applicable	-	NPC2	3956	yes
FALSE	2410	14	79256213	14	79260677	14	79722556	14	79727020	12851	648739	654600	insertion	1	-1	heterozygous	1	-1	1397	65.6	not_applicable	NRXN3	DQ587130	348275	yes
FALSE	2411	14	79636532	14	79649336	14	80102875	14	80115679	12851	269201	273268	deletion	1	-1	homozygous	1	793	8738	21.2	not_applicable	NRXN3	DIO2	548189	yes
FALSE	2412	14	79636532	14	79649336	14	80102875	14	80115679	12852	269201	273268	deletion	1	-1	homozygous	1	793	8738	21.2	not_applicable	NRXN3	DIO2	548189	yes
FALSE	2413	14	81313007	14	81324570	14	81779351	14	81790914	1782	1.07739e+06	1.09163e+06	insertion	1	-1	homozygous	1	794	2674	76.2	not_applicable	STON2	DQ580701	76169	yes
FALSE	2414	14	82023876	14	82045416	14	82490220	14	82511760	1782	1.78966e+06	1.80723e+06	deletion	1	-1	homozygous	1	795	3978	49	not_applicable	-	Mir_633	32552	yes
FALSE	2415	14	80486928	14	80504076	14	80953271	14	80970419	1781	252064	270911	insertion	1	-1	heterozygous	1	-1	1699	70.9	not_applicable	CEP128	DIO2-AS1	31462	yes
FALSE	2416	14	81313007	14	81324570	14	81779351	14	81790914	1781	1.07739e+06	1.09163e+06	insertion	1	-1	homozygous	1	794	2674	76.2	not_applicable	STON2	DQ580701	76169	yes
FALSE	2417	14	82023876	14	82045416	14	82490220	14	82511760	1781	1.78966e+06	1.80723e+06	deletion	1	-1	homozygous	1	795	3978	49	not_applicable	-	Mir_633	32552	yes
FALSE	2418	14	83114622	14	83122542	14	83580966	14	83588886	25891	893704	902995	insertion	1	-1	homozygous	1	796	1371	51.7	not_applicable	-	DQ580701	21660	yes
FALSE	2419	14	83114622	14	83122542	14	83580966	14	83588886	25892	893704	902995	insertion	1	-1	homozygous	1	796	1371	51.7	not_applicable	-	DQ580701	21660	yes
FALSE	2420	14	85908492	14	85927961	14	86374836	14	86394305	30811	949638	974620	insertion	1	-1	homozygous	1	797	5514	37.1	not_applicable	-	LOC101928767	6717	yes
FALSE	2421	14	85908492	14	85927961	14	86374836	14	86394305	30812	949638	974620	insertion	1	-1	homozygous	1	797	5514	37.1	not_applicable	-	LOC101928767	6717	yes
FALSE	2424	14	91265228	14	91295602	14	91731572	14	91761946	25521	2.24284e+06	2.27424e+06	insertion	1	-1	heterozygous	1	-1	1024	84.8	not_applicable	CCDC88C	GPR68	20721	yes
FALSE	2425	14	91631155	14	91640037	14	92097499	14	92106381	25521	2.61005e+06	2.62254e+06	insertion	1	-1	homozygous	1	798	3615	65.6	not_applicable	CATSPERB	pp8961	55885	yes
FALSE	2426	14	91631155	14	91640037	14	92097499	14	92106381	25522	2.61005e+06	2.62254e+06	insertion	1	-1	homozygous	1	798	3615	65.6	not_applicable	CATSPERB	pp8961	55885	yes
FALSE	2428	14	92543808	14	92552632	14	93010153	14	93018977	1711	1.19773e+06	1.20826e+06	insertion	1	-1	homozygous	1	799	1705	94	not_applicable	RIN3	JC172250	35432	yes
FALSE	2429	14	92543808	14	92552632	14	93010153	14	93018977	1712	1.19773e+06	1.20826e+06	insertion	1	-1	homozygous	1	799	1705	94	not_applicable	RIN3	JC172250	35432	yes
FALSE	2431	14	95417256	14	95420798	14	95883593	14	95887135	13790	152260	157109	insertion	1	-1	homozygous	1	-1	1308	44.4	not_applicable	SYNE3	LINC00341	7167	yes
FALSE	2435	14	103894629	14	103897119	14	104360966	14	104363456	27691	2690.4	6189.3	insertion	1	-1	homozygous	1	801	1009	72.8	not_applicable	-	C14orf2	15169	yes
FALSE	2436	14	103894629	14	103897119	14	104360966	14	104363456	27692	2690.4	6189.3	insertion	1	-1	homozygous	1	801	1009	72.8	not_applicable	-	C14orf2	15169	yes
FALSE	2437	14	104211914	14	104218237	14	104678251	14	104684574	22742	206340	213845	insertion	1	-1	homozygous	1	802	1182	72.8	not_applicable	-	KIF26A	31017	yes
FALSE	2438	14	104297814	14	104304131	14	104764151	14	104770468	22742	114198	125729	insertion	1	-1	heterozygous	1	-1	5215	34.4	not_applicable	-	KIF26A	116917	yes
FALSE	2439	14	104211914	14	104218237	14	104678251	14	104684574	22741	207692	215197	insertion	1	-1	homozygous	1	802	1182	72.8	not_applicable	-	KIF26A	31017	yes
FALSE	2440	14	104442910	14	104449419	14	104909247	14	104915756	14392	18483.3	26054.6	insertion	1	-1	homozygous	1	803	1062	82.1	not_applicable	-	DQ594820	33114	yes
FALSE	2441	14	104442910	14	104449419	14	104909247	14	104915756	14391	18483.3	26054.6	insertion	1	-1	homozygous	1	803	1062	82.1	not_applicable	-	DQ594820	33114	yes
FALSE	2443	14	105097469	14	105117755	14	105563806	14	105584092	25951	1.74956e+06	1.76761e+06	deletion	1	-1	homozygous	1	804	2242	15.9	not_applicable	DQ578550;DQ575296;DQ588545	DQ598327	17462	yes
FALSE	2444	14	105226516	14	105262417	14	105692853	14	105728754	25951	1.59906e+06	1.64014e+06	insertion	1	-1	homozygous	1	805	5176	59.6	not_applicable	BRF1;BTBD6	NUDT14	45194	yes
FALSE	2445	14	105472484	14	105481272	14	105938821	14	105947609	25951	1.37679e+06	1.38689e+06	insertion	1	-1	homozygous	1	806	1306	76.8	not_applicable	CRIP2;HV555659	MTA1	1765	yes
FALSE	2448	14	106256739	14	106264936	14	106713335	14	106721529	25951	571278	590582	insertion	1	-1	homozygous	1	809	11108	27.8	not_applicable	abParts	LINC00226	22738	yes
FALSE	2449	14	106698803	14	106767692	14	107154820	14	107175935	25951	114817	138620	deletion	1	-1	homozygous	1	810	45087	50.3	not_applicable	abParts	DQ593458	57363	yes
FALSE	2450	14	105097469	14	105117755	14	105563806	14	105584092	25952	1.74956e+06	1.76761e+06	deletion	1	-1	homozygous	1	804	2242	15.9	not_applicable	DQ578550;DQ575296;DQ588545	DQ598327	17462	yes
FALSE	2451	14	105226516	14	105262417	14	105692853	14	105728754	25952	1.59906e+06	1.64014e+06	insertion	1	-1	homozygous	1	805	5176	59.6	not_applicable	BRF1;BTBD6	NUDT14	45194	yes
FALSE	2452	14	105472484	14	105481272	14	105938821	14	105947609	25952	1.37679e+06	1.38689e+06	insertion	1	-1	homozygous	1	806	1306	76.8	not_applicable	CRIP2;HV555659	MTA1	1765	yes
FALSE	2455	14	106256739	14	106264936	14	106713335	14	106721529	25952	571278	590582	insertion	1	-1	homozygous	1	809	11108	27.8	not_applicable	abParts	LINC00226	22738	yes
FALSE	2456	14	106698803	14	106767692	14	107154820	14	107175935	25952	114817	138620	deletion	1	-1	homozygous	1	810	45087	50.3	not_applicable	abParts	DQ593458	57363	yes
TRUE	2467	15	24262572	15	24428672	15	24507719	15	24673819	25871	1.24794e+06	1.25004e+06	deletion	1	-1	homozygous	1	814	164003	1.3	not_applicable	-	PWRN2	92667	yes
TRUE	2469	15	24262572	15	24428672	15	24507719	15	24673819	25872	1.24794e+06	1.25004e+06	deletion	1	-1	homozygous	1	814	164003	1.3	not_applicable	-	PWRN2	92667	yes
FALSE	2471	15	2.56829e+07	15	25692463	15	25928083	15	25937610	31211	2717377	2.72561e+06	deletion	0.99	-1	heterozygous	1	-1	1300	31.8	not_applicable	ATP10A	AX747189	8511.5	yes
FALSE	2472	15	25750512	15	25767596	15	25995659	15	26012743	31211	2638891	2.65911e+06	insertion	1	-1	heterozygous	1	-1	3138	31.8	not_applicable	ATP10A	AX747189	76088	yes
FALSE	2475	15	29550872	15	2.95611e+07	15	29843076	15	29853260	9091	409761	428620	insertion	1	-1	homozygous	1	816	8675	90.7	not_applicable	FAM189A1	L13714	57441	yes
FALSE	2476	15	29550872	15	2.95611e+07	15	29843076	15	29853260	9092	409761	428620	insertion	1	-1	homozygous	1	816	8675	90.7	not_applicable	FAM189A1	L13714	57441	yes
FALSE	2477	15	34337193	15	34349692	15	34629394	15	34641893	11621	588651	603104	insertion	1	-1	homozygous	1	817	1953	87.4	not_applicable	NOP10;NUTM1	SLC12A6	350	yes
FALSE	2478	15	34374148	15	34378163	15	34666349	15	34670364	11621	627752	637028	insertion	1	-1	homozygous	1	818	5261	76.2	not_applicable	DQ580140;DQ600650	GOLGA8A	906	yes
FALSE	2479	15	34337193	15	34349692	15	34629394	15	34641893	11622	580907	595359	insertion	1	-1	homozygous	1	817	1953	87.4	not_applicable	NOP10;NUTM1	SLC12A6	350	yes
FALSE	2480	15	34374148	15	34378163	15	34666349	15	34670364	11622	620008	629284	insertion	1	-1	homozygous	1	818	5261	76.2	not_applicable	DQ580140;DQ600650	GOLGA8A	906	yes
FALSE	2481	15	40049636	15	40052649	15	40341837	15	40344850	4992	1.45666e+06	1.4613e+06	insertion	1	-1	homozygous	1	819	1625	96	not_applicable	SRP14-AS1	SRP14	10449	yes
FALSE	2482	15	40049636	15	40052649	15	40341837	15	40344850	4991	1.45666e+06	1.4613e+06	insertion	1	-1	homozygous	1	819	1625	96	not_applicable	SRP14-AS1	SRP14	10449	yes
FALSE	2487	15	45673108	15	45705843	15	45965306	15	45998041	9670	748778	784441	insertion	0.99	-1	homozygous	1	-1	2927	43.7	not_applicable	SQRDL;JC172329	DQ590734	18133	yes
FALSE	2493	15	54923312	15	54943467	15	55215510	15	55235665	30761	2.36874e+06	2.38253e+06	deletion	1	-1	homozygous	1	822	6371	69.5	not_applicable	-	DQ587130	180077	yes
FALSE	2494	15	54923312	15	54943467	15	55215510	15	55235665	30762	2.36786e+06	2.38165e+06	deletion	1	-1	homozygous	1	822	6371	69.5	not_applicable	-	DQ587130	180077	yes
FALSE	2498	15	66101187	15	66107335	15	66393525	15	66399673	26681	129555	147882	insertion	1	-1	homozygous	1	824	12178	94	not_applicable	MEGF11	MIR4311	60856	yes
FALSE	2499	15	66101187	15	66107335	15	66393525	15	66399673	26682	129555	147882	insertion	1	-1	homozygous	1	824	12178	94	not_applicable	MEGF11	MIR4311	60856	yes
FALSE	2500	15	6.8391e+07	15	68401959	15	68683352	15	68694298	4141	873402	888758	insertion	1	-1	homozygous	1	825	4410	91.4	not_applicable	ITGA11	FEM1B	95148.5	yes
FALSE	2501	15	6.8391e+07	15	68401959	15	68683352	15	68694298	4142	873402	888758	insertion	1	-1	homozygous	1	825	4410	91.4	not_applicable	ITGA11	FEM1B	95148.5	yes
FALSE	2504	15	70545825	15	7.05626e+07	15	70838164	15	70854952	26131	456389	476362	insertion	1	-1	homozygous	1	826	3186	23.2	not_applicable	-	DQ596939	24361.5	yes
FALSE	2505	15	70545825	15	7.05626e+07	15	70838164	15	70854952	26132	456389	475767	insertion	1	-1	homozygous	1	826	2591	24.5	not_applicable	-	DQ596939	24361.5	yes
FALSE	2506	15	74214211	15	74220313	15	74506552	15	74512654	6532	418515	426689	insertion	1	-1	homozygous	1	827	2073	99.3	not_applicable	-	HP11097	1333	yes
FALSE	2507	15	7.4542e+07	15	74562665	15	74834305	15	74855006	6532	72954.9	96035	insertion	1	-1	homozygous	1	828	2379	94	not_applicable	ARID3B	CLK3	52329	yes
FALSE	2508	15	74214211	15	74220313	15	74506552	15	74512654	6531	635450	643624	insertion	1	-1	homozygous	1	827	2072	99.3	not_applicable	-	HP11097	1333	yes
FALSE	2509	15	7.4542e+07	15	74562665	15	74834305	15	74855006	6531	289890	312970	insertion	1	-1	homozygous	1	828	2378	94	not_applicable	ARID3B	CLK3	52329	yes
FALSE	2511	15	77689302	15	77702759	15	77981644	15	77995101	29661	2.40677e+06	2.42255e+06	insertion	1	-1	homozygous	1	830	2326	87.4	not_applicable	-	BC038758	21229	yes
FALSE	2513	15	77689302	15	77702759	15	77981644	15	77995101	29662	2.40677e+06	2.42255e+06	insertion	1	-1	homozygous	1	830	2326	87.4	not_applicable	-	BC038758	21229	yes
FALSE	2516	15	82855999	15	82880847	15	83524751	15	83549599	25530	334204	352778	deletion	1	-1	homozygous	1	-1	6274	67.5	not_applicable	HOMER2	AK130329	10781	yes
FALSE	2517	15	83225654	15	83247745	15	83894406	15	83916497	5072	979191	1.00528e+06	insertion	1	-1	homozygous	1	832	3995	35.8	not_applicable	-	BNC1	8158	yes
FALSE	2518	15	83405674	15	83421665	15	84074426	15	84090417	5072	808343	821256	deletion	1	-1	homozygous	1	833	3079	5.3	not_applicable	-	SH3GL3	25674	yes
FALSE	2519	15	83225654	15	83247745	15	83894406	15	83916497	5071	920085	946171	insertion	1	-1	homozygous	1	832	3995	35.8	not_applicable	-	BNC1	8158	yes
FALSE	2520	15	83405674	15	83421665	15	84074426	15	84090417	5071	749237	762150	deletion	1	-1	homozygous	1	833	3078	5.3	not_applicable	-	SH3GL3	25674	yes
FALSE	2521	15	86006629	15	86020032	15	86549860	15	86563263	23750	19566.7	34557.8	insertion	1	-1	homozygous	1	-1	1588	71.5	not_applicable	DQ578392	DQ580215	91959	yes
FALSE	2522	15	90645122	15	90666451	15	91188354	15	91209682	11380	28720.2	52718.7	insertion	1	-1	homozygous	1	-1	2669	84.8	not_applicable	CRTC3;BC038778	BLM	50876	yes
TRUE	2523	15	90881314	15	91870087	15	91424544	15	92413317	22721	552669	691467	deletion	0.99	-1	homozygous	1	834	849975	0	not_applicable	FURIN;FES;MAN2A2;HDDC3;UNC45A;RCCD1;PRC1;PRC1-AS1;VPS33B;AC068831.10;DQ571680;SV2B;JC172092;DQ580215;DQ571824;RP11-661P17.1;TRNA_Pseudo;SLCO3A1	BLM	65853	yes
TRUE	2524	15	90881314	15	91870087	15	91424544	15	92413317	22722	552669	691467	deletion	0.99	-1	homozygous	1	834	849975	0	not_applicable	FURIN;FES;MAN2A2;HDDC3;UNC45A;RCCD1;PRC1;PRC1-AS1;VPS33B;AC068831.10;DQ571680;SV2B;JC172092;DQ580215;DQ571824;RP11-661P17.1;TRNA_Pseudo;SLCO3A1	BLM	65853	yes
TRUE	2525	15	90881314	15	91863736	15	91424544	15	92406966	24061	1.39367e+06	1526087	deletion	0.99	-1	homozygous	1	834	850008	0	not_applicable	FURIN;FES;MAN2A2;HDDC3;UNC45A;RCCD1;PRC1;PRC1-AS1;VPS33B;AC068831.10;DQ571680;SV2B;JC172092;DQ580215;DQ571824;RP11-661P17.1;TRNA_Pseudo;SLCO3A1	BLM	65853	yes
TRUE	2526	15	90881314	15	91863736	15	91424544	15	92406966	24062	1.63866e+06	1.77107e+06	deletion	0.99	-1	homozygous	1	834	850008	0	not_applicable	FURIN;FES;MAN2A2;HDDC3;UNC45A;RCCD1;PRC1;PRC1-AS1;VPS33B;AC068831.10;DQ571680;SV2B;JC172092;DQ580215;DQ571824;RP11-661P17.1;TRNA_Pseudo;SLCO3A1	BLM	65853	yes
TRUE	2527	15	91856446	20	14429703	15	92399676	20	14410349	23601	786025	563340	translocation_interchr	0	-1	unknown	-1	717	-1	0	pass	SLCO3A1;MACROD2	DQ587130	38342	yes
TRUE	2528	15	91856446	20	14429703	15	92399676	20	14410349	23602	749156	526471	translocation_interchr	0	-1	unknown	-1	-1	-1	0	pass	SLCO3A1;MACROD2	DQ587130	38342	yes
TRUE	2529	15	92019390	21	41691432	15	92562620	21	43111592	24061	1.23737e+06	1.14296e+06	translocation_interchr	0	-1	heterozygous	1	835	-1	0	pass	SLCO3A1;LINC00111	LINC00479	20088	yes
TRUE	2530	15	92019390	21	41691432	15	92562620	21	43111592	24062	1.48235e+06	1.38795e+06	translocation_interchr	0	-1	heterozygous	1	835	-1	0	pass	SLCO3A1;LINC00111	LINC00479	20088	yes
TRUE	2531	15	92019390	21	41691432	15	92562620	21	43111592	22721	841760	936487	translocation_interchr	0	-1	heterozygous	1	835	-1	0	pass	SLCO3A1;LINC00111	LINC00479	20088	yes
TRUE	2532	15	92019390	21	41691432	15	92562620	21	43111592	22722	841760	936487	translocation_interchr	0	-1	heterozygous	1	835	-1	0	pass	SLCO3A1;LINC00111	LINC00479	20088	yes
FALSE	2533	15	92124178	15	92145162	15	92667408	15	92688392	31300	42700.9	61483	deletion	1	-1	heterozygous	1	836	2201	11.3	not_applicable	SLCO3A1	ST8SIA2	248748	yes
TRUE	2534	15	92124178	15	92135819	15	92667408	15	92679049	28991	907911	917168	deletion	1	-1	heterozygous	2	836	2384	11.3	not_applicable	SLCO3A1	ST8SIA2	258091	yes
TRUE	2535	15	92124178	15	92135819	15	92667408	15	92679049	28992	510625	519882	deletion	1	-1	heterozygous	2	836	2384	11.3	not_applicable	SLCO3A1	ST8SIA2	258091	yes
FALSE	2536	15	92124178	15	92135819	15	92667408	15	92679049	33800	191711	200951	deletion	1	-1	heterozygous	2	836	2402	11.3	not_applicable	SLCO3A1	ST8SIA2	258091	yes
TRUE	2537	15	92124178	15	92135819	15	92667408	15	92679049	31441	545782	555050	deletion	1	-1	heterozygous	2	836	2374	11.3	not_applicable	SLCO3A1	ST8SIA2	258091	yes
TRUE	2538	15	92124178	15	92135819	15	92667408	15	92679049	31442	467450	476717	deletion	1	-1	heterozygous	2	836	2374	11.3	not_applicable	SLCO3A1	ST8SIA2	258091	yes
TRUE	2539	15	92124178	15	92135819	15	92667408	15	92679049	30610	318118	327330	deletion	1	-1	heterozygous	2	836	2428	11.3	not_applicable	SLCO3A1	ST8SIA2	258091	yes
FALSE	2540	15	94047692	15	94065471	15	94590921	15	94608700	25571	632144	651120	insertion	1	-1	homozygous	1	837	1197	84.1	not_applicable	-	JC172329	15678	yes
FALSE	2541	15	94047692	15	94065471	15	94590921	15	94608700	25572	649215	668191	insertion	1	-1	homozygous	1	837	1198	84.1	not_applicable	-	JC172329	15678	yes
TRUE	2546	15	98358859	20	14637328	15	98902088	20	14617974	31661	215352	477882	translocation_interchr	0	-1	unknown	-1	713	-1	0	pass	MACROD2	MACROD2-IT1	8421	yes
TRUE	2547	15	98358859	20	14637328	15	98902088	20	14617974	31661	1.43661e+06	1.17418e+06	translocation_interchr	0	-1	unknown	-1	713	-1	0	pass	MACROD2	MACROD2-IT1	8421	yes
TRUE	2548	15	98358859	20	14637328	15	98902088	20	14617974	31662	215352	477882	translocation_interchr	0	-1	unknown	-1	713	-1	0	pass	MACROD2	MACROD2-IT1	8421	yes
TRUE	2549	15	98358859	20	14637328	15	98902088	20	14617974	31662	1.43661e+06	1.17418e+06	translocation_interchr	0	-1	unknown	-1	-1	-1	0	pass	MACROD2	MACROD2-IT1	8421	yes
TRUE	2550	15	98419616	16	62735070	15	98962845	16	62768974	22251	857654	995452	translocation_interchr	0	-1	unknown	-1	838	-1	0	pass	-	AF205198	1264	yes
TRUE	2551	15	98419616	16	62735070	15	98962845	16	62768974	22252	857654	995452	translocation_interchr	0	-1	unknown	-1	838	-1	0	pass	-	AF205198	1264	yes
TRUE	2554	15	1.00554e+08	15	100565347	15	101094402	15	101105552	31661	1.99273e+06	2.00533e+06	insertion	1	-1	heterozygous	1	840	1451	12.6	not_applicable	PRKXP1;BC032026	LINS	3876	yes
FALSE	2555	15	1.00554e+08	15	100565347	15	101094402	15	101105552	17751	200563	207859	deletion	1	-1	heterozygous	2	840	3856	18.5	not_applicable	PRKXP1;BC032026	LINS	3876	yes
FALSE	2556	15	100705854	15	100711842	15	101246059	15	101252047	17751	51714.6	59762.3	insertion	1	-1	homozygous	1	841	2060	34.4	not_applicable	-	ASB7	54156	yes
FALSE	2557	15	1.00554e+08	15	100565347	15	101094402	15	101105552	17752	201360	208656	deletion	1	-1	heterozygous	2	840	3856	18.5	not_applicable	PRKXP1;BC032026	LINS	3876	yes
FALSE	2558	15	100705854	15	100711842	15	101246059	15	101252047	17752	51714.6	60559.2	insertion	1	-1	homozygous	1	841	2857	26.5	not_applicable	-	ASB7	54156	yes
FALSE	2559	15	1.00554e+08	15	100565347	15	101094402	15	101105552	23431	320565	333236	insertion	1	-1	heterozygous	1	840	1520	12.6	not_applicable	PRKXP1;BC032026	LINS	3876	yes
FALSE	2560	15	1.00554e+08	15	100565347	15	101094402	15	101105552	23432	159573	172244	insertion	1	-1	heterozygous	1	840	1520	12.6	not_applicable	PRKXP1;BC032026	LINS	3876	yes
FALSE	2561	15	101537059	15	101547744	15	102077262	15	102087947	11502	446410	460308	insertion	1	-1	heterozygous	1	842	3213	59.6	not_applicable	-	PCSK6	47076	yes
FALSE	2562	15	101747832	15	101769186	15	102288035	15	102309389	11502	205748	246422	insertion	1	-1	homozygous	1	843	19320	44.4	not_applicable	BC101079;DQ597539;DQ576894;DQ593864;DQ582666;DQ597539;DQ593432;DQ575740;DQ582460;DQ593630;DQ575740;DQ582460;DQ597539;DQ596486;DQ582666;DQ582294;DQ575740;DQ595661;DQ582460;DQ588430;DQ582666;DQ593630;DQ593353;DQ597703;DQ585237;DQ582460;DQ588428;DQ586526;DQ593627;DQ582666;DQ588434;DQ597703;DQ582460;DQ586138;DQ593627;DQ586526;DQ588436;DQ582666;DQ597703;DQ575740;DQ588362;DQ582460;DQ593630;DQ588436;DQ5…	DQ592653	1362	yes
FALSE	2563	15	1.01534e+08	15	1.0155e+08	15	102074607	15	102090152	11501	444278	462701	insertion	1	-1	heterozygous	2	842	2878	62.3	not_applicable	-	PCSK6	44420.5	yes
FALSE	2564	15	101747832	15	101769186	15	102288035	15	102309389	11501	205748	246422	insertion	1	-1	homozygous	1	843	19320	44.4	not_applicable	BC101079;DQ597539;DQ576894;DQ593864;DQ582666;DQ597539;DQ593432;DQ575740;DQ582460;DQ593630;DQ575740;DQ582460;DQ597539;DQ596486;DQ582666;DQ582294;DQ575740;DQ595661;DQ582460;DQ588430;DQ582666;DQ593630;DQ593353;DQ597703;DQ585237;DQ582460;DQ588428;DQ586526;DQ593627;DQ582666;DQ588434;DQ597703;DQ582460;DQ586138;DQ593627;DQ586526;DQ588436;DQ582666;DQ597703;DQ575740;DQ588362;DQ582460;DQ593630;DQ588436;DQ5…	DQ592653	1362	yes
FALSE	2565	16	474561	16	495637	16	524561	16	545637	23791	317274	341349	insertion	1	-1	homozygous	1	844	2998	68.2	not_applicable	RAB11FIP3	LINC00235	31210	yes
FALSE	2566	16	845823	16	882764	16	895823	16	932764	23791	697760	740132	insertion	1	-1	homozygous	1	845	5433	41.7	not_applicable	LMF1	PRR25	31963	yes
FALSE	2572	16	185431	16	193041	16	235430	16	243040	23792	21142.9	30650.2	insertion	1	-1	heterozygous	1	-1	1898	18.5	not_applicable	LUC7L	HBQ1	4253	yes
FALSE	2573	16	474561	16	495637	16	524561	16	545637	23792	318437	342511	insertion	1	-1	homozygous	1	844	2999	68.2	not_applicable	RAB11FIP3	LINC00235	31210	yes
FALSE	2574	16	845823	16	882764	16	895823	16	932764	23792	698922	741295	insertion	1	-1	homozygous	1	845	5432	41.7	not_applicable	LMF1	PRR25	31963	yes
FALSE	2581	16	2860675	16	2866455	16	2910676	16	2916456	8671	510161	522300	insertion	1	-1	homozygous	1	850	6358	100	not_applicable	-	PRSS22	2506	yes
FALSE	2582	16	2860675	16	2866455	16	2910676	16	2916456	8672	510161	522300	insertion	1	-1	homozygous	1	850	6358	100	not_applicable	-	PRSS22	2506	yes
FALSE	2586	16	8062255	16	8099966	16	8112257	16	8149968	13660	559488	600630	insertion	1	-1	homozygous	1	-1	3432	44.4	not_applicable	-	DQ580663	14503	yes
TRUE	2588	16	14813087	16	15315750	16	14906944	16	15409607	30411	855318	1.52466e+06	insertion	1	-1	heterozygous	1	853	166678	33.1	not_applicable	ABCC6P2;NOMO1;MIR3179-1;MIR3670-1;MIR3180-1;DQ586919;LOC100288162;MIR6511A2;AK294825;MIR6770-2;NPIPA1;PDXDC1;MIR1972-1;NTAN1;RRN3;FLJ00286;FLJ00285;MIR3180-4;MIR3670-1	NPIPA3	47630	yes
TRUE	2590	16	14813087	16	15315750	16	14906944	16	15409607	30412	855318	1.52466e+06	insertion	1	-1	heterozygous	1	853	166678	33.1	not_applicable	ABCC6P2;NOMO1;MIR3179-1;MIR3670-1;MIR3180-1;DQ586919;LOC100288162;MIR6511A2;AK294825;MIR6770-2;NPIPA1;PDXDC1;MIR1972-1;NTAN1;RRN3;FLJ00286;FLJ00285;MIR3180-4;MIR3670-1	NPIPA3	47630	yes
TRUE	2595	16	16830166	16	16859298	16	16924023	16	16953155	30411	3047984	3.07117e+06	deletion	1	-1	heterozygous	1	854	5947	43.7	not_applicable	-	DQ587130	16400	yes
TRUE	2596	16	16830166	16	16859298	16	16924023	16	16953155	30412	3047984	3.07117e+06	deletion	1	-1	heterozygous	1	854	5947	43.7	not_applicable	-	DQ587130	16400	yes
FALSE	2598	16	2.08266e+07	16	20851045	16	20837943	16	20862367	10022	50499.1	78247	insertion	1	-1	heterozygous	1	-1	3323	0.7	not_applicable	LOC81691	DCUN1D3	7029	yes
FALSE	2599	16	21209296	16	21223018	16	21220617	16	21234339	5321	306398	324487	insertion	1	-1	homozygous	1	855	4367	55.6	not_applicable	ZP2	ANKS4B	10677	yes
FALSE	2600	16	21209296	16	21223018	16	21220617	16	21234339	5322	306398	324487	insertion	1	-1	homozygous	1	855	4367	55.6	not_applicable	ZP2	ANKS4B	10677	yes
FALSE	2606	16	23029680	16	23053871	16	23041001	16	23065192	23990	26318.9	48570.5	deletion	0.98	-1	homozygous	1	-1	1939	58.3	not_applicable	-	USP31	7536	yes
FALSE	2607	16	25316358	16	25340183	16	25327679	16	25351504	24542	542942	563590	deletion	1	-1	homozygous	1	856	3178	66.9	not_applicable	-	DQ595564	57259	yes
FALSE	2609	16	25316358	16	25340183	16	25327679	16	25351504	24541	542942	563590	deletion	1	-1	homozygous	1	856	3178	66.9	not_applicable	-	DQ595564	57259	yes
FALSE	2610	16	26171275	16	2.61792e+07	16	26182596	16	26190566	25841	269861	282353	insertion	1	-1	homozygous	1	857	4522	55	not_applicable	-	HS3ST4	33588	yes
FALSE	2611	16	26171275	16	2.61792e+07	16	26182596	16	26190566	25842	269861	282353	insertion	1	-1	homozygous	1	857	4522	55	not_applicable	-	HS3ST4	33588	yes
FALSE	2612	16	30122611	16	30128284	16	30133932	16	30139605	27070	399094	406761	insertion	1	-1	homozygous	1	-1	1995	90.7	not_applicable	SMG1P2;MAPK3	GDPD3	9055	yes
FALSE	2622	16	52369242	16	52395380	16	52403154	16	52429292	10262	167098	190906	deletion	0.99	-1	heterozygous	1	-1	2330	5.3	not_applicable	-	TOX3	42626	yes
FALSE	2624	16	60871578	16	6.08985e+07	16	60905482	16	60932405	30242	540594	563935	deletion	1	-1	heterozygous	1	-1	3582	21.2	not_applicable	-	MIR4426	157206	yes
FALSE	2625	16	65127339	16	6.5138e+07	16	65161242	16	65171935	3651	449492	463196	insertion	1	-1	heterozygous	1	859	3013	92.1	not_applicable	-	CDH11	5324	yes
FALSE	2626	16	65319062	16	65326840	16	65352965	16	65360743	3651	259091	268425	insertion	1	-1	homozygous	1	860	1556	90.1	not_applicable	LINC00922	JC001844	59579	yes
FALSE	2627	16	65127339	16	65133102	16	65161242	16	65167005	3652	453912	463196	insertion	1	-1	heterozygous	2	859	3522	92.1	not_applicable	-	CDH11	5324	yes
FALSE	2628	16	65319062	16	65326840	16	65352965	16	65360743	3652	259091	268425	insertion	1	-1	homozygous	1	860	1556	90.1	not_applicable	LINC00922	JC001844	59579	yes
FALSE	2629	16	67705584	16	67719763	16	67739487	16	67753666	14170	305145	326993	insertion	1	-1	homozygous	1	-1	7669	27.2	not_applicable	GFOD2;DQ586451	RANBP10	3339	yes
FALSE	2630	16	68082771	16	68111339	16	68116674	16	68145242	20691	80112.7	112269	insertion	1	-1	heterozygous	1	-1	3588	9.3	not_applicable	NFATC3;JC172092	DUS2	3449	yes
FALSE	2633	16	69193804	16	69199372	16	69227707	16	69233275	732	79851.1	90253.3	insertion	1	-1	homozygous	1	862	4834	79.5	not_applicable	SNTB2	CIRH1A	24771	yes
FALSE	2634	16	69193804	16	69199372	16	69227707	16	69233275	731	61972.9	72375.1	insertion	1	-1	homozygous	1	862	4835	79.5	not_applicable	SNTB2	CIRH1A	24771	yes
FALSE	2641	16	71270092	16	71302481	16	71303995	16	71336384	30941	243653	280784	insertion	1	-1	heterozygous	1	863	4742	92.7	not_applicable	CMTR2	HYDIN	39371	yes
FALSE	2642	16	71382982	16	71387196	16	71416885	16	71421099	30941	361628	367135	insertion	1	-1	homozygous	1	864	1294	98.7	not_applicable	CALB2	TRNA_Met	39297	yes
FALSE	2643	16	71283414	16	71302481	16	71317317	16	71336384	30942	256956	280784	insertion	1	-1	heterozygous	2	863	4761	92.7	not_applicable	CMTR2	HYDIN	52693	yes
FALSE	2644	16	71382982	16	71387196	16	71416885	16	71421099	30942	361628	367135	insertion	1	-1	homozygous	1	864	1294	98.7	not_applicable	CALB2	TRNA_Met	39297	yes
TRUE	2647	16	75198214	16	7.52087e+07	16	75232112	16	75242618	1471	101574	113608	insertion	1	-1	homozygous	1	866	1528	0	not_applicable	CTRB2	JC172092	7968.5	yes
TRUE	2648	16	75218707	16	75224451	16	75252605	16	75258349	1471	87188.3	91612.5	deletion	0.98	-1	homozygous	1	867	1320	3.3	not_applicable	CTRB1	LOC100506281	1932	yes
TRUE	2650	16	74807163	16	74814309	16	74841061	16	74848207	1472	498430	508344	insertion	1	-1	heterozygous	1	-1	2769	38.4	not_applicable	-	DQ586319	7008	yes
TRUE	2651	16	75198214	16	7.52087e+07	16	75232112	16	75242618	1472	101574	113608	insertion	1	-1	homozygous	1	866	1528	0	not_applicable	CTRB2	JC172092	7968.5	yes
TRUE	2652	16	75218707	16	75224451	16	75252605	16	75258349	1472	87188.3	91612.5	deletion	0.98	-1	homozygous	1	867	1320	3.3	not_applicable	CTRB1	LOC100506281	1932	yes
FALSE	2653	16	75463771	16	7.54778e+07	16	75497669	16	75511702	5151	850993	867369	insertion	1	-1	homozygous	1	868	2344	41.7	not_applicable	TMEM170A;CHST6	CFDP1	30283	yes
FALSE	2654	16	76005413	16	7.6034e+07	16	76039311	16	76067941	5151	286700	322905	insertion	1	-1	homozygous	1	869	7576	89.4	not_applicable	-	DQ571826	176835	yes
FALSE	2655	16	75463771	16	7.54778e+07	16	75497669	16	75511702	5152	850993	867369	insertion	1	-1	homozygous	1	868	2344	41.7	not_applicable	TMEM170A;CHST6	CFDP1	30283	yes
FALSE	2656	16	76005413	16	7.6034e+07	16	76039311	16	76067941	5152	286700	322905	insertion	1	-1	homozygous	1	869	7576	89.4	not_applicable	-	DQ571826	176835	yes
FALSE	2659	16	80922030	16	80989599	16	80955927	16	81023204	751	2.05002e+06	2.11045e+06	deletion	1	-1	heterozygous	1	-1	7135	6	not_applicable	L13714;CMC2	CENPN	16899	yes
FALSE	2664	16	81764412	16	8.1767e+07	16	81798017	16	81800618	1461	1.27321e+06	1.27723e+06	insertion	1	-1	homozygous	1	870	1423	43.7	not_applicable	-	PLCG2	12281.5	yes
FALSE	2666	16	81764412	16	8.1767e+07	16	81798017	16	81800618	1462	1.27321e+06	1.27723e+06	insertion	1	-1	homozygous	1	870	1423	43.7	not_applicable	-	PLCG2	12281.5	yes
FALSE	2667	16	84041066	16	84058880	16	84074671	16	84092485	2501	405490	424539	insertion	1	-1	heterozygous	1	-1	1234	23.2	not_applicable	SLC38A8;MBTPS1	NECAB2	38293	yes
FALSE	2669	16	83950028	16	83952591	16	83983633	16	83986196	2502	512247	516042	insertion	1	-1	heterozygous	1	-1	1233	71.5	not_applicable	-	OSGIN1	631	yes
FALSE	2671	16	85965293	16	85980244	16	85998899	16	86013850	27511	301816	318548	insertion	1	-1	homozygous	1	871	1780	19.2	not_applicable	-	IRF8	42689	yes
FALSE	2673	16	85965293	16	85980244	16	85998899	16	86013850	27512	319233	335964	insertion	1	-1	homozygous	1	871	1781	19.2	not_applicable	-	IRF8	42689	yes
FALSE	2675	16	86985730	16	86988880	16	87019336	16	87022486	12370	55017.5	60121.7	insertion	1	-1	homozygous	1	-1	1954	97.4	not_applicable	-	AK125749	94682	yes
FALSE	2677	16	88730120	16	88734493	16	88796528	16	88800901	1201	1.47576e+06	1.48448e+06	insertion	1	-1	homozygous	1	874	4346	71.5	not_applicable	PIEZO1;RP5-1142A6.2	AK097767	8328	yes
FALSE	2678	16	89002768	16	8.90185e+07	16	89069176	16	89084928	1201	1.75565e+06	1.77311e+06	insertion	1	-1	homozygous	1	875	1705	95.4	not_applicable	-	CBFA2T3	25673	yes
FALSE	2680	16	88730120	16	88734493	16	88796528	16	88800901	1202	1.47468e+06	1.4834e+06	insertion	1	-1	homozygous	1	874	4346	71.5	not_applicable	PIEZO1;RP5-1142A6.2	AK097767	8328	yes
FALSE	2681	16	89002768	16	8.90185e+07	16	89069176	16	89084928	1202	1.75457e+06	1.77202e+06	insertion	1	-1	homozygous	1	875	1705	95.4	not_applicable	-	CBFA2T3	25673	yes
FALSE	2683	16	89625047	16	89649524	16	89691455	16	89715932	25102	516823	544968	insertion	1	-1	homozygous	1	877	3668	81.5	not_applicable	DPEP1;CHMP1A	SPATA33	8280	yes
FALSE	2684	16	89903309	16	89913305	16	89969717	16	89979713	25102	801248	812639	insertion	1	-1	homozygous	1	878	1396	74.2	not_applicable	TCF25;BC160930	TUBB3	9974	yes
FALSE	2685	16	90035413	16	90046618	16	90101821	16	90113026	25102	935696	950421	insertion	1	-1	heterozygous	1	-1	3520	30.5	not_applicable	GAS8;AK127378;URAHP	C16orf3	5513	yes
FALSE	2687	16	89625047	16	89649524	16	89691455	16	89715932	25101	516823	544968	insertion	1	-1	homozygous	1	877	3668	81.5	not_applicable	DPEP1;CHMP1A	SPATA33	8280	yes
FALSE	2688	16	89903309	16	89913305	16	89969717	16	89979713	25101	801248	812639	insertion	1	-1	homozygous	1	878	1396	74.2	not_applicable	TCF25;BC160930	TUBB3	9974	yes
FALSE	2690	17	251687	17	258687	17	101478	17	108478	22392	246105	255115	insertion	1	-1	homozygous	1	879	2010	30.5	not_applicable	RPH3AL	LOC100506371	64437	yes
FALSE	2691	17	284873	17	293106	17	134664	17	142897	22392	212493	218874	deletion	0.98	-1	homozygous	1	880	1853	2.6	not_applicable	RPH3AL	LOC100506388	38099	yes
FALSE	2692	17	299520	17	319133	17	149311	17	168924	22392	166103	205768	insertion	1	-1	homozygous	1	881	20051	37.7	not_applicable	RPH3AL	LOC100506388	12072	yes
FALSE	2693	17	330742	17	348952	17	180533	17	198743	22392	138824	154320	deletion	1	-1	homozygous	1	882	2713	4	not_applicable	RPH3AL;LOC100506388	DQ571358	13140	yes
FALSE	2694	17	251687	17	258687	17	101478	17	108478	22391	246105	255115	insertion	1	-1	homozygous	1	879	2010	30.5	not_applicable	RPH3AL	LOC100506371	64437	yes
FALSE	2695	17	284873	17	293106	17	134664	17	142897	22391	212493	218874	deletion	0.98	-1	homozygous	1	880	1853	2.6	not_applicable	RPH3AL	LOC100506388	38099	yes
FALSE	2696	17	299520	17	319133	17	149311	17	168924	22391	166103	205768	insertion	1	-1	homozygous	1	881	20051	37.7	not_applicable	RPH3AL	LOC100506388	12072	yes
FALSE	2697	17	330742	17	348952	17	180533	17	198743	22391	138824	154320	deletion	1	-1	homozygous	1	882	2713	4	not_applicable	RPH3AL;LOC100506388	DQ571358	13140	yes
FALSE	2700	17	1156912	17	1190691	17	1060206	17	1093985	8501	90318.8	127330	insertion	1	-1	homozygous	1	883	3233	38.4	not_applicable	ABR	DQ580663	24603	yes
FALSE	2701	17	1200880	17	1.22131e+06	17	1104174	17	1124606	8501	137463	160031	insertion	0.99	-1	homozygous	1	884	2136	77.5	not_applicable	DQ580663	ABR	20907	yes
FALSE	2702	17	1299382	17	1314916	17	1202676	17	1218210	8501	239548	257780	insertion	1	-1	homozygous	1	885	2698	29.8	not_applicable	TUSC5	BHLHA9	28112	yes
FALSE	2703	17	1.15654e+06	17	1190691	17	1059834	17	1093985	8502	90318.8	127330	insertion	1	-1	homozygous	1	883	2860	39.1	not_applicable	ABR	DQ580663	24603	yes
FALSE	2704	17	1200880	17	1.22131e+06	17	1104174	17	1124606	8502	137463	160031	insertion	0.99	-1	homozygous	1	884	2136	77.5	not_applicable	DQ580663	ABR	20907	yes
FALSE	2705	17	1299382	17	1314916	17	1202676	17	1218210	8502	239548	257780	insertion	1	-1	homozygous	1	885	2698	29.8	not_applicable	TUSC5	BHLHA9	28112	yes
FALSE	2706	17	2379411	17	2379411	17	2282705	17	2282705	7211	455495	533672	insertion	1	-1	heterozygous	1	-1	78176	0	not_applicable	SGSM2	MNT	4649	yes
FALSE	2707	17	2379411	17	2379411	17	2282705	17	2282705	7212	455495	534479	insertion	1	-1	heterozygous	1	-1	78984	0	not_applicable	SGSM2	MNT	4649	yes
FALSE	2708	17	5054989	17	5061190	17	4958284	17	4964485	13230	122010	131005	insertion	1	-1	homozygous	1	-1	2794	83.4	not_applicable	-	ZFP3	17269	yes
FALSE	2709	17	7291925	17	7310537	17	7195244	17	7213856	1261	1.12609e+06	1.1479e+06	insertion	1	-1	homozygous	1	886	3199	99.3	not_applicable	YBX2;EIF5A;EIF5A	GPS2	2122	yes
FALSE	2710	17	7431675	17	7436921	17	7334994	17	7340240	1261	1.26958e+06	1273639	deletion	0.99	-1	homozygous	1	887	1190	9.9	not_applicable	TMEM102	FGF11	2449	yes
FALSE	2711	17	7291925	17	7310537	17	7195244	17	7213856	1262	1.12609e+06	1.1479e+06	insertion	1	-1	homozygous	1	886	3199	99.3	not_applicable	YBX2;EIF5A;EIF5A	GPS2	2122	yes
FALSE	2712	17	7431675	17	7436921	17	7334994	17	7340240	1262	1.26958e+06	1273639	deletion	0.99	-1	homozygous	1	887	1190	9.9	not_applicable	TMEM102	FGF11	2449	yes
FALSE	2713	17	8384553	17	8410909	17	8287871	17	8314227	4782	800563	831620	insertion	1	-1	homozygous	1	888	4700	40.4	not_applicable	RNF222	RPL26	1307	yes
FALSE	2714	17	8384553	17	8410909	17	8287871	17	8314227	4781	770391	801448	insertion	1	-1	homozygous	1	888	4701	40.4	not_applicable	RNF222	RPL26	1307	yes
FALSE	2716	17	15864832	17	15908843	17	15768146	17	15812157	29751	1.03211e+06	1.07186e+06	deletion	1	-1	homozygous	1	889	4258	30.5	not_applicable	-	L13714	24457	yes
FALSE	2717	17	15864832	17	15908843	17	15768146	17	15812157	29752	1.03211e+06	1.07186e+06	deletion	1	-1	homozygous	1	889	4258	30.5	not_applicable	-	L13714	24457	yes
FALSE	2718	17	17811947	17	17816779	17	17715261	17	17720093	6271	169675	175512	insertion	1	-1	heterozygous	1	-1	1005	18.5	not_applicable	SREBF1;MIR6777;MIR33B	RAI1	497	yes
FALSE	2719	17	18362831	17	18399448	17	18266145	17	18302762	23062	54601.2	100308	insertion	1	-1	homozygous	1	890	9090	55	not_applicable	SHMT1;EVPLL;DQ598548;DQ585640;DQ570768;DQ576083;DQ589581;DQ585755;DQ595911;DQ578124;DQ579248;DQ592713;DQ586114;DQ600542;DQ585853;DQ593368;DQ578661;DQ573130	DQ579174	339	yes
FALSE	2720	17	18362831	17	18393156	17	18266145	17	18296470	29100	54284.8	94565.8	insertion	1	-1	homozygous	1	890	9956	55	not_applicable	SHMT1;EVPLL;DQ598548;DQ585640;DQ570768;DQ576083;DQ589581;DQ585755;DQ595911;DQ578124;DQ579248	DQ592713	300	yes
FALSE	2721	17	19010141	17	19020151	17	18913454	17	18923464	8431	435609	446961	insertion	1	-1	homozygous	1	891	1342	47.7	not_applicable	SLC5A10;DQ597681	GRAP	526	yes
FALSE	2722	17	19010141	17	19020151	17	18913454	17	18923464	8432	435609	446961	insertion	1	-1	homozygous	1	891	1342	47.7	not_applicable	SLC5A10;DQ597681	GRAP	526	yes
FALSE	2726	17	22375007	17	22412371	17	21901613	17	21911700	24452	364998	384407	deletion	1	-1	homozygous	1	893	17954	10.6	not_applicable	FLJ36000	FAM27L	75115	yes
FALSE	2727	17	22375007	17	22412371	17	21901613	17	21911700	24451	364998	384407	deletion	1	-1	homozygous	1	893	17954	10.6	not_applicable	FLJ36000	FAM27L	75115	yes
FALSE	2728	17	28454032	17	28460761	17	26781050	17	26787779	1092	1.3271e+06	1.33514e+06	insertion	1	-1	homozygous	1	895	1315	55.6	not_applicable	DQ578550;DQ580663;DQ601422	DQ587130	3164	yes
FALSE	2729	17	28454032	17	28460761	17	26781050	17	26787779	1091	1.3271e+06	1.33514e+06	insertion	1	-1	homozygous	1	895	1315	55.6	not_applicable	DQ578550;DQ580663;DQ601422	DQ587130	3164	yes
FALSE	2735	17	34542719	17	34561885	17	32869738	17	32888904	61492	297350	315116	deletion	0.98	-1	homozygous	1	897	1400	8.6	not_applicable	-	C17orf102	12238	yes
FALSE	2736	17	34542719	17	34561885	17	32869738	17	32888904	27471	297350	315116	deletion	0.98	-1	homozygous	1	897	1400	8.6	not_applicable	-	C17orf102	12238	yes
FALSE	2741	17	36755563	17	36768480	17	35111858	17	35125664	13750	701510	715429	insertion	1	-1	homozygous	1	-1	1001	96.7	not_applicable	-	L13714	17782	yes
FALSE	2746	17	41241555	17	41282536	17	39397807	17	39438788	18262	496740	527425	deletion	1	-1	homozygous	1	902	10295	77.5	not_applicable	KRTAP9-4;KRTAP9-9;KRTAP9-6;KRTAP9-7	KRTAP9-8	2552	yes
FALSE	2747	17	41241555	17	41282536	17	39397807	17	39438788	18261	357442	388128	deletion	1	-1	homozygous	1	902	10296	77.5	not_applicable	KRTAP9-4;KRTAP9-9;KRTAP9-6;KRTAP9-7	KRTAP9-8	2552	yes
FALSE	2748	17	41629109	17	41637071	17	39785361	17	39793323	17801	57035.7	66460.8	insertion	1	-1	homozygous	1	903	1463	90.7	not_applicable	KRT42P	KRT17	4480	yes
FALSE	2749	17	41629109	17	41637071	17	39785361	17	39793323	17802	46136.1	55561.2	insertion	1	-1	homozygous	1	903	1463	90.7	not_applicable	KRT42P	KRT17	4480	yes
FALSE	2750	17	42394206	17	42400597	17	40546224	17	40552615	13561	299344	306867	insertion	1	-1	homozygous	1	904	1132	96	not_applicable	-	PTRF	1852	yes
FALSE	2751	17	42394206	17	42400597	17	40546224	17	40552615	13562	299344	306867	insertion	1	-1	homozygous	1	904	1132	96	not_applicable	-	PTRF	1852	yes
TRUE	2759	17	45636219	20	42601240	17	43713585	20	41229880	23000	140500	126015	translocation_interchr	0.55	-1	heterozygous	1	-1	-1	0	pass	PTPRT	CRHR1-IT1	2756	yes
FALSE	2760	17	48083410	17	4.8101e+07	17	46160772	17	46178412	1771	257155	276223	insertion	1	-1	heterozygous	1	-1	1428	91.4	not_applicable	CBX1	SNX11	6508.5	yes
FALSE	2761	17	4.84952e+07	17	48504154	17	46572554	17	46581516	1771	670439	683715	insertion	1	-1	heterozygous	1	-1	4314	0	not_applicable	-	HOXB1	25291	yes
FALSE	2762	17	49746707	17	49752270	17	47824069	17	47829632	3641	361239	365618	deletion	0.99	-1	homozygous	1	908	1184	5.3	not_applicable	FAM117A	KAT7	36349	yes
FALSE	2763	17	50037691	17	50045735	17	48115055	17	48123099	3641	64900.1	75337.6	insertion	1	-1	homozygous	1	909	2393	93.4	not_applicable	-	RP11-1094H24.4	4614	yes
FALSE	2764	17	50076238	17	50088290	17	48153602	17	48165654	3641	20370.6	34189.6	insertion	1	-1	homozygous	1	910	1767	92.1	not_applicable	ITGA3	PDK2	6985	yes
FALSE	2765	17	49746707	17	49752270	17	47824069	17	47829632	3642	361239	365618	deletion	0.99	-1	homozygous	1	908	1184	5.3	not_applicable	FAM117A	KAT7	36349	yes
FALSE	2766	17	50036963	17	50045735	17	48114327	17	48123099	3642	64900.1	76786.4	insertion	1	-1	homozygous	1	909	3114	93.4	not_applicable	-	RP11-1094H24.4	4614	yes
FALSE	2767	17	50076238	17	50088290	17	48153602	17	48165654	3642	20370.6	34189.6	insertion	1	-1	homozygous	1	910	1767	92.1	not_applicable	ITGA3	PDK2	6985	yes
FALSE	2772	17	52582403	17	52611216	17	50659763	17	50688576	25561	1.19143e+06	1.22806e+06	insertion	1	-1	homozygous	1	912	7821	84.1	not_applicable	-	JC172208	22585	yes
FALSE	2773	17	52582403	17	52611216	17	50659763	17	50688576	25562	1.19143e+06	1.22806e+06	insertion	1	-1	homozygous	1	912	7821	84.1	not_applicable	-	JC172208	22585	yes
FALSE	2774	17	56081024	17	56096203	17	54158385	17	54173564	911	1579599	1.58205e+06	deletion	1	-1	heterozygous	1	-1	12724	4	not_applicable	-	ANKFN1	57272	yes
FALSE	2775	17	57608299	17	57619814	17	55685660	17	55697175	10771	184728	194386	deletion	0.98	-1	homozygous	1	913	1857	39.7	not_applicable	MSI2	CCDC182	124667	yes
FALSE	2776	17	57608299	17	57619814	17	55685660	17	55697175	10772	184728	194386	deletion	0.98	-1	homozygous	1	913	1857	39.7	not_applicable	MSI2	CCDC182	124667	yes
FALSE	2777	17	57608299	17	57619814	17	55685660	17	55697175	24860	76028.8	85597.3	deletion	0.98	-1	homozygous	1	913	1946	39.7	not_applicable	MSI2	CCDC182	124667	yes
FALSE	2780	17	66636867	17	66641900	17	64632985	17	64638018	1521	206573	218124	insertion	1	-1	homozygous	1	914	6519	12.6	not_applicable	PRKCA	MIR634	145172	yes
FALSE	2782	17	66636867	17	66641900	17	64632985	17	64638018	1522	206573	218124	insertion	1	-1	homozygous	1	914	6519	12.6	not_applicable	PRKCA	MIR634	145172	yes
FALSE	2783	17	70449855	17	70483009	17	68445996	17	68479150	23491	324224	351327	deletion	1	-1	homozygous	1	915	6052	49	not_applicable	-	JC172329	41987	yes
FALSE	2784	17	70449855	17	70483009	17	68445996	17	68479150	23492	324224	351327	deletion	1	-1	homozygous	1	915	6052	49	not_applicable	-	JC172329	41987	yes
FALSE	2785	17	72829481	17	72885525	17	70825620	17	70881664	19251	94011.6	165030	insertion	1	-1	homozygous	1	916	14974	34.4	not_applicable	SLC39A11;DQ580215	DQ580215	81494	yes
FALSE	2786	17	72829481	17	72885525	17	70825620	17	70881664	19252	94011.6	156929	insertion	1	-1	homozygous	1	916	6873	17.9	not_applicable	SLC39A11;DQ580215	DQ580215	81494	yes
FALSE	2787	17	76067233	17	76074973	17	74063314	17	74071054	16070	105752	117232	insertion	1	-1	homozygous	1	-1	3740	75.5	not_applicable	SRP68;GALR2	ZACN	4209	yes
FALSE	2790	17	80077947	17	80087158	17	78051746	17	78060957	411	1.76924e+06	1.78034e+06	insertion	1	-1	homozygous	1	918	1882	96.7	not_applicable	CCDC40	MIR1268B	11670	yes
FALSE	2792	17	80924478	17	80931515	17	78898278	17	78905315	411	917602	925822	insertion	1	-1	homozygous	1	920	1184	98	not_applicable	RPTOR	AK127919	34724	yes
FALSE	2794	17	81241578	17	81265592	17	79215378	17	79239392	411	576136	603354	insertion	1	-1	homozygous	1	922	3204	78.1	not_applicable	SLC38A10	C17orf89	281	yes
FALSE	2795	17	81336003	17	81355216	17	79309803	17	79329016	411	482439	504740	insertion	1	-1	homozygous	1	923	3088	88.7	not_applicable	DQ600853	TMEM105	5330	yes
FALSE	2798	17	80077947	17	80087158	17	78051746	17	78060957	412	1769281	1.78037e+06	insertion	1	-1	homozygous	1	918	1882	96.7	not_applicable	CCDC40	MIR1268B	11670	yes
FALSE	2800	17	80924478	17	80931515	17	78898278	17	78905315	412	918674	926895	insertion	1	-1	homozygous	1	920	1184	98	not_applicable	RPTOR	AK127919	34724	yes
FALSE	2802	17	81241578	17	81265592	17	79215378	17	79239392	412	577209	604427	insertion	1	-1	homozygous	1	922	3203	78.1	not_applicable	SLC38A10	C17orf89	281	yes
FALSE	2803	17	81336003	17	81355216	17	79309803	17	79329016	412	483512	505813	insertion	1	-1	homozygous	1	923	3088	88.7	not_applicable	DQ600853	TMEM105	5330	yes
FALSE	2806	17	82574686	17	82592645	17	80532562	17	80550521	5271	315022	336715	insertion	1	-1	homozygous	1	926	3734	72.8	not_applicable	FOXK2	WDR45B	21917	yes
FALSE	2808	17	82574686	17	82592645	17	80532562	17	80550521	5272	315022	336715	insertion	1	-1	homozygous	1	926	3734	72.8	not_applicable	FOXK2	WDR45B	21917	yes
FALSE	2810	17	83066368	17	8.30732e+07	17	81024244	17	81031078	11200	154618	162798	insertion	1	-1	homozygous	1	-1	1348	13.2	not_applicable	-	METRNL	6489.5	yes
FALSE	2811	17	83126788	17	8.31369e+07	#N/A	#N/A	17	81084694	11200	217843	229514	insertion	1	-1	homozygous	1	-1	1534	31.1	not_applicable	-	METRNL	31943	yes
FALSE	2813	18	3100813	18	3112487	18	3100811	18	3112485	15490	46409	62049.4	insertion	1	-1	homozygous	1	-1	3966	98	not_applicable	MYOM1	DQ586320	50598	yes
FALSE	2814	18	4510425	18	4520480	18	4510425	18	4520480	10421	627988	642346	insertion	1	-1	homozygous	1	927	4303	57	not_applicable	-	DLGAP1	55160	yes
FALSE	2815	18	4510425	18	4520480	18	4510425	18	4520480	10422	627988	642346	insertion	1	-1	homozygous	1	927	4303	57	not_applicable	-	DLGAP1	55160	yes
FALSE	2827	18	13140404	18	1.31453e+07	18	13140403	18	13145274	8571	318344	322162	deletion	0.99	-1	heterozygous	1	-1	1051	6.6	not_applicable	-	DQ571358	5892	yes
FALSE	2828	18	21198040	18	21214426	18	18778001	18	18794387	27520	140086	158437	insertion	1	-1	heterozygous	1	-1	1964	23.8	not_applicable	-	GREB1L	27816	yes
FALSE	2829	18	22229588	18	22238025	18	19809551	18	19817988	17791	455661	465712	insertion	1	-1	homozygous	1	931	1613	93.4	not_applicable	-	GATA6	27061	yes
FALSE	2832	18	22229588	18	22238025	18	19809551	18	19817988	17792	455661	465712	insertion	1	-1	homozygous	1	931	1613	93.4	not_applicable	-	GATA6	27061	yes
FALSE	2833	18	2.25498e+07	18	22552873	18	20129782	18	20132836	7281	230597	238782	insertion	1	-1	homozygous	1	932	5130	71.5	not_applicable	-	CTAGE1	131904	yes
FALSE	2834	18	2.25498e+07	18	22552873	18	20129782	18	20132836	7282	230597	238782	insertion	1	-1	homozygous	1	932	5130	71.5	not_applicable	-	CTAGE1	131904	yes
FALSE	2838	18	32306339	18	32312493	18	29886302	18	29892456	12441	112830	117624	deletion	0.98	-1	homozygous	1	934	1360	7.9	not_applicable	GAREM	MEP1B	85937	yes
FALSE	2839	18	32306339	18	32312493	18	29886302	18	29892456	12442	74387.3	79181.8	deletion	0.98	-1	homozygous	1	934	1360	7.9	not_applicable	GAREM	MEP1B	85937	yes
FALSE	2841	18	36459931	18	36464086	18	34039894	18	34044049	1541	788150	793711	insertion	1	-1	homozygous	1	935	1405	95.4	not_applicable	FHOD3	DQ596066	9956	yes
FALSE	2842	18	36459931	18	36464086	18	34039894	18	34044049	1542	788150	793711	insertion	1	-1	homozygous	1	935	1405	95.4	not_applicable	FHOD3	DQ596066	9956	yes
FALSE	2844	18	39479379	18	39482698	18	37059343	18	37062662	23802	1.18912e+06	1.19133e+06	deletion	0.98	-1	homozygous	1	936	1107	18.5	not_applicable	-	DQ587130	40498	yes
FALSE	2845	18	39479379	18	39482698	18	37059343	18	37062662	23801	165728	167940	deletion	0.98	-1	homozygous	1	936	1108	18.5	not_applicable	-	DQ587130	40498	yes
FALSE	2847	18	40671019	18	40688642	18	38250983	18	38268606	28092	1.36358e+06	1.37447e+06	deletion	1	-1	homozygous	1	938	6737	24.5	not_applicable	-	DQ587130	13153	yes
FALSE	2848	18	41281978	18	41302265	18	38861942	18	38882229	28092	755332	771958	deletion	1	-1	homozygous	1	939	3662	84.1	not_applicable	-	JC172208	35686	yes
FALSE	2851	18	40671019	18	40688642	18	38250983	18	38268606	28091	1.36923e+06	1.38011e+06	deletion	1	-1	homozygous	1	938	6737	24.5	not_applicable	-	DQ587130	13153	yes
FALSE	2852	18	41281978	18	41302265	18	38861942	18	38882229	28091	760976	777602	deletion	1	-1	homozygous	1	939	3662	84.1	not_applicable	-	JC172208	35686	yes
FALSE	2857	18	48664671	18	48673399	18	46191042	18	46199770	4351	1.18324e+06	1196199	insertion	1	-1	homozygous	1	942	4232	92.1	not_applicable	CTIF;MIR4743	DQ580215	168536	yes
FALSE	2858	18	49201696	18	49204331	18	46728066	18	46730701	4351	646952	652064	insertion	1	-1	homozygous	1	943	2476	27.8	not_applicable	DYM;DQ588547;DQ601422	DQ598327	120231	yes
FALSE	2859	18	48664671	18	48673399	18	46191042	18	46199770	4352	1.18324e+06	1196199	insertion	1	-1	homozygous	1	942	4232	92.1	not_applicable	CTIF;MIR4743	DQ580215	168536	yes
FALSE	2860	18	49201696	18	49204331	18	46728066	18	46730701	4352	646952	652064	insertion	1	-1	homozygous	1	943	2476	27.8	not_applicable	DYM;DQ588547;DQ601422	DQ598327	120231	yes
FALSE	2862	18	51422630	18	5.14284e+07	18	48949000	18	48954805	15270	213053	220023	insertion	1	-1	homozygous	1	-1	1165	66.9	not_applicable	RP11-267C16.1	MEX3C	224950	yes
FALSE	2863	18	51687096	18	51688497	18	49213466	18	49214867	20330	195606	201725	insertion	1	-1	homozygous	1	-1	4719	23.8	not_applicable	-	RP11-267C16.1	218719	yes
FALSE	2865	18	54418967	18	54443192	18	51945337	18	51969562	13492	333164	353348	deletion	1	-1	homozygous	1	945	4041	54.3	not_applicable	-	C18orf54	36933	yes
FALSE	2867	18	54418967	18	54443192	18	51945337	18	51969562	13491	292900	313084	deletion	1	-1	homozygous	1	945	4042	54.3	not_applicable	-	C18orf54	36933	yes
FALSE	2868	18	57276751	18	57287050	18	54943982	18	54954281	12351	259042	267156	deletion	1	-1	homozygous	1	946	2185	49.7	not_applicable	-	ST8SIA3	65440	yes
FALSE	2869	18	57276751	18	57287050	18	54943982	18	54954281	12352	259042	267156	deletion	1	-1	homozygous	1	946	2185	49.7	not_applicable	-	ST8SIA3	65440	yes
FALSE	2872	18	65915604	18	65922107	18	63582840	18	63589343	16421	391295	396700	deletion	0.99	-1	homozygous	1	948	1099	3.3	not_applicable	-	CDH7	34666	yes
FALSE	2874	18	67452712	18	67456905	18	65119949	18	65124142	25672	127136	151782	insertion	1	-1	homozygous	1	-1	20452	89.4	not_applicable	DQ594187	DSEL	49677	yes
FALSE	2875	18	68515904	18	68544044	18	66183141	18	66211281	26271	39618	65346.2	deletion	1	-1	homozygous	1	-1	2412	73.5	not_applicable	-	DQ590736	38081	yes
FALSE	2876	18	70275363	18	70289424	18	67942599	18	67956660	9141	170570	182838	deletion	0.98	-1	homozygous	1	949	1792	3.3	not_applicable	SOCS6	RTTN	69638	yes
FALSE	2877	18	70469325	18	70474213	18	68136561	18	68141449	9141	363625	375158	insertion	1	-1	homozygous	1	950	6645	95.4	not_applicable	-	DQ593458	4295	yes
FALSE	2878	18	70275363	18	70289424	18	67942599	18	67956660	9142	170570	182838	deletion	0.98	-1	homozygous	1	949	1792	3.3	not_applicable	SOCS6	RTTN	69638	yes
FALSE	2879	18	70469325	18	70474213	18	68136561	18	68141449	9142	363625	375158	insertion	1	-1	homozygous	1	950	6645	95.4	not_applicable	-	DQ593458	4295	yes
FALSE	2880	18	74199276	18	74212314	18	71866511	18	71879549	8801	503158	518734	insertion	1	-1	homozygous	1	951	2538	86.8	not_applicable	-	TIMM21	40308	yes
FALSE	2881	18	74613672	18	74617699	18	72280908	#N/A	#N/A	8801	921332	927572	insertion	0.99	-1	homozygous	1	952	2213	68.9	not_applicable	-	ZNF407	13268	yes
FALSE	2882	18	74199276	18	74212314	18	71866511	18	71879549	8802	503158	518734	insertion	1	-1	homozygous	1	951	2538	86.8	not_applicable	-	TIMM21	40308	yes
FALSE	2883	18	74613672	18	74617699	18	72280908	#N/A	#N/A	8802	921332	927572	insertion	0.99	-1	homozygous	1	952	2213	68.9	not_applicable	-	ZNF407	13268	yes
FALSE	2885	18	76943143	18	7.69616e+07	18	74655099	18	74673549	7441	1.30898e+06	1.32858e+06	insertion	1	-1	homozygous	1	954	1149	98	not_applicable	ZNF236	MBP	17240.5	yes
FALSE	2887	18	76943143	18	7.69616e+07	18	74655099	18	74673549	7442	1.26547e+06	1.28507e+06	insertion	1	-1	homozygous	1	954	1149	98	not_applicable	ZNF236	MBP	17240.5	yes
FALSE	2888	18	77250803	18	77253952	18	74962759	18	74965908	5872	901125	905288	insertion	1	-1	homozygous	1	955	1013	47	not_applicable	GALR1	MBP	117986	yes
FALSE	2889	18	77250803	18	77253952	18	74962759	18	74965908	5871	975333	979496	insertion	1	-1	homozygous	1	955	1013	47	not_applicable	GALR1	MBP	117986	yes
FALSE	2890	18	77712205	18	77718047	18	75424161	18	75430003	5871	511064	515858	deletion	0.99	-1	heterozygous	1	-1	1048	0	not_applicable	-	LINC01029	253249	yes
FALSE	2891	18	78229382	18	78235384	18	75989382	18	75995384	17990	157197	164333	insertion	1	-1	homozygous	1	-1	1133	25.8	not_applicable	-	BC001368	1922	yes
FALSE	2894	18	78971516	18	79060989	18	76731516	18	76820989	9801	769952	878522	insertion	1	-1	homozygous	1	957	19097	28.5	not_applicable	SALL3	ATP9B	8408	yes
FALSE	2897	18	78971516	18	79060989	18	76731516	18	76820989	9802	769952	878522	insertion	1	-1	homozygous	1	957	19097	28.5	not_applicable	SALL3	ATP9B	8408	yes
FALSE	2901	19	423961	19	434633	19	423961	19	434633	30211	600026	614586	insertion	1	-1	homozygous	1	960	3888	50.3	not_applicable	SHC2	C2CD4C	14792	yes
FALSE	2902	19	877106	19	883322	19	877106	19	883322	30211	132201	150361	insertion	1	-1	homozygous	1	961	11944	61.6	not_applicable	MED16	RNU6-2	10162	yes
FALSE	2904	19	423961	19	434633	19	423961	19	434633	30212	596461	611021	insertion	1	-1	homozygous	1	960	3888	50.3	not_applicable	SHC2	C2CD4C	14792	yes
FALSE	2905	19	877106	19	883322	19	877106	19	883322	30212	132201	146796	insertion	1	-1	homozygous	1	961	8379	92.1	not_applicable	MED16	RNU6-2	10162	yes
FALSE	2907	19	1136571	19	1170343	19	1136570	19	1170342	22561	434464	475019	insertion	1	-1	homozygous	1	962	6784	90.1	not_applicable	SBNO2	GPX4	29783	yes
FALSE	2908	19	1.04647e+06	19	1058044	19	1046471	19	1058043	22562	554368	571454	insertion	1	-1	heterozygous	1	-1	5514	23.8	not_applicable	ABCA7	CNN2	7407.5	yes
FALSE	2909	19	1136571	19	1170343	19	1136570	19	1170342	22562	434464	475019	insertion	1	-1	homozygous	1	962	6784	90.1	not_applicable	SBNO2	GPX4	29783	yes
FALSE	2910	19	1948944	19	1955099	19	1948943	19	1955098	5231	389975	394653	deletion	0.98	-1	heterozygous	1	-1	1477	17.9	not_applicable	CSNK1G2;CSNK1G2-AS1	SCAMP4	22932	yes
FALSE	2912	19	1610099	19	1635386	19	1610098	19	1635385	5232	711374	737789	insertion	1	-1	heterozygous	1	-1	1127	55	not_applicable	TCF3	UQCR11	4616	yes
FALSE	2914	19	3122847	19	3128317	19	3122845	19	3128315	901	788979	796692	insertion	1	-1	homozygous	1	964	2242	75.5	not_applicable	GNA11	GNA15	7876	yes
FALSE	2915	19	3.98727e+06	19	4020505	19	3987269	19	4020503	901	1.66119e+06	1.69868e+06	insertion	1	-1	homozygous	1	965	4252	82.1	not_applicable	L13714;DQ571320;PIAS4	EEF2	1808.5	yes
FALSE	2916	19	4738781	19	4742840	19	4738793	19	4742852	901	2.42276e+06	2.42801e+06	insertion	1	-1	homozygous	1	966	1189	84.8	not_applicable	-	TRNA_Val	14075	yes
FALSE	2917	19	3122847	19	3128317	19	3122845	19	3128315	902	789912	797625	insertion	1	-1	homozygous	1	964	2243	75.5	not_applicable	GNA11	GNA15	7876	yes
FALSE	2918	19	3.98727e+06	19	4020505	19	3987269	19	4020503	902	1662125	1.69961e+06	insertion	1	-1	homozygous	1	965	4251	82.1	not_applicable	L13714;DQ571320;PIAS4	EEF2	1808.5	yes
FALSE	2919	19	4738781	19	4742840	19	4738793	19	4742852	902	2.42369e+06	2.42894e+06	insertion	1	-1	homozygous	1	966	1189	84.8	not_applicable	-	TRNA_Val	14075	yes
FALSE	2924	19	7441859	19	7452411	19	7506745	19	7517297	542	330323	361010	insertion	1	-1	homozygous	1	968	20134	60.9	not_applicable	ARHGEF18	LOC100128573	20426	yes
FALSE	2925	19	7550204	19	7587349	19	7615090	19	7652235	542	459461	490524	deletion	1	-1	heterozygous	1	-1	6081	0	not_applicable	PNPLA6	CAMSAP3	8553	yes
FALSE	2926	19	8576852	19	8657418	19	8641736	19	8766951	17370	97932.6	185430	insertion	1	-1	homozygous	1	-1	6931	51	not_applicable	MYO1F;ADAMTS10;JC172208	DQ595533	25989	yes
FALSE	2927	19	8895315	19	8898244	19	9005991	19	9008920	6980	159910	178082	insertion	1	-1	homozygous	1	-1	15242	90.7	not_applicable	MUC16	MBD3L1	51976	yes
FALSE	2929	19	12581279	19	12621231	19	12692093	19	12732045	24481	1.56834e+06	1.60458e+06	deletion	1	-1	homozygous	1	969	3716	43	not_applicable	ZNF490;ZNF791	MAN2B1	25277	yes
FALSE	2930	19	12581279	19	12621231	19	12692093	19	12732045	24482	1.56834e+06	1.60458e+06	deletion	1	-1	homozygous	1	969	3716	43	not_applicable	ZNF490;ZNF791	MAN2B1	25277	yes
FALSE	2931	19	13535250	19	13538115	19	13646064	19	13648929	24482	2.524e+06	2.52849e+06	insertion	1	-1	heterozygous	1	-1	1622	39.7	not_applicable	-	BC042451	14994	yes
FALSE	2932	19	14753860	19	14775498	19	14864672	19	14886310	24011	991126	1.01484e+06	insertion	0.99	-1	homozygous	1	970	2076	70.9	not_applicable	EMR2	OR7C1	23676	yes
FALSE	2933	19	16052870	19	16067867	19	16163680	19	16178677	24011	2297371	2.31403e+06	insertion	1	-1	heterozygous	1	-1	1662	55.6	not_applicable	TPM4	LINC00905	10736	yes
FALSE	2934	19	1.84354e+07	19	18445111	19	18546247	19	18555921	24011	4.69471e+06	4.70587e+06	insertion	1	-1	homozygous	1	971	1486	83.4	not_applicable	ISYNA1;ELL	SSBP4	876.2	yes
FALSE	2935	19	14753860	19	14775498	19	14864672	19	14886310	24012	991126	1.01484e+06	insertion	0.99	-1	homozygous	1	970	2076	70.9	not_applicable	EMR2	OR7C1	23676	yes
FALSE	2936	19	14932522	19	14954281	19	15043334	19	15065093	24012	1.1718e+06	1190708	deletion	1	-1	heterozygous	1	-1	2849	41.1	not_applicable	OR7C2;SLC1A6	OR7A17	51168	yes
FALSE	2937	19	1.56798e+07	19	1.57101e+07	19	15790653	19	15820942	24012	1.91778e+06	1.94982e+06	insertion	1	-1	heterozygous	1	-1	1747	37.7	not_applicable	CYP4F12	OR10H2	17892.5	yes
FALSE	2938	19	1.84354e+07	19	18445111	19	18546247	19	18555921	24012	4691597	4.70276e+06	insertion	1	-1	homozygous	1	971	1485	83.4	not_applicable	ISYNA1;ELL	SSBP4	876.2	yes
FALSE	2939	19	21534261	19	21535990	19	21717063	19	21718792	28391	1.34837e+06	1.35299e+06	insertion	1	-1	homozygous	1	972	2888	10.6	not_applicable	ZNF429	DQ588911	15776	yes
FALSE	2940	19	21534261	19	21535990	19	21717063	19	21718792	28392	1.34837e+06	1.35299e+06	insertion	1	-1	homozygous	1	972	2888	10.6	not_applicable	ZNF429	DQ588911	15776	yes
FALSE	2942	19	23308477	19	23341891	19	23491279	19	23524693	22762	990201	1.02676e+06	insertion	1	-1	homozygous	1	973	3146	63.6	not_applicable	CR936790	ZNF91	15805	yes
FALSE	2944	19	23827798	19	23866040	19	24010600	19	24048842	22762	458748	502043	insertion	1	-1	homozygous	1	975	5053	84.1	not_applicable	RPSA;AK124278	ZNF726	48842	yes
FALSE	2946	19	24065021	19	24087669	19	24247823	19	24270471	22762	232670	258008	insertion	1	-1	homozygous	1	977	2691	84.8	not_applicable	DQ571826;ZNF254	DQ571358	22896	yes
FALSE	2947	19	23308477	19	23341891	19	23491279	19	23524693	22761	1.07924e+06	1.1158e+06	insertion	1	-1	homozygous	1	973	3147	63.6	not_applicable	CR936790	ZNF91	15805	yes
FALSE	2949	19	23827798	19	23866040	19	24010600	19	24048842	22761	547790	591085	insertion	1	-1	homozygous	1	975	5052	84.1	not_applicable	RPSA;AK124278	ZNF726	48842	yes
FALSE	2951	19	24065021	19	24087669	19	24247823	19	24270471	22761	321711	347050	insertion	1	-1	homozygous	1	977	2690	84.8	not_applicable	DQ571826;ZNF254	DQ571358	22896	yes
FALSE	2952	19	29887009	19	29903290	19	30377916	19	30394197	1351	638805	650624	deletion	1	-1	homozygous	1	978	4462	91.4	not_applicable	DQ578550;DQ588545	URI1	38949	yes
FALSE	2953	19	29887009	19	29903290	19	30377916	19	30394197	1352	638805	650624	deletion	1	-1	homozygous	1	978	4462	91.4	not_applicable	DQ578550;DQ588545	URI1	38949	yes
FALSE	2955	19	33247872	19	33251724	19	33738778	19	33742630	381	109117	114345	insertion	1	-1	homozygous	1	980	1377	99.3	not_applicable	-	SLC7A10	22023	yes
FALSE	2958	19	33247872	19	33251724	19	33738778	19	33742630	382	109117	114345	insertion	1	-1	homozygous	1	980	1377	99.3	not_applicable	-	SLC7A10	22023	yes
FALSE	2960	19	34233874	19	34248829	19	34724779	19	34739734	2641	874253	896512	insertion	1	-1	homozygous	1	982	7303	94.7	not_applicable	-	LSM14A	4360	yes
FALSE	2962	19	34233874	19	34248829	19	34724779	19	34739734	2642	874253	896512	insertion	1	-1	homozygous	1	982	7303	94.7	not_applicable	-	LSM14A	4360	yes
FALSE	2963	19	3.4386e+07	19	34393027	19	34876881	19	34883932	5411	36577.3	61009.7	insertion	1	-1	homozygous	1	983	17380	92.1	not_applicable	GPI	PDCD2L	11371	yes
FALSE	2965	19	3.4386e+07	19	34393027	19	34876881	19	34883932	5412	36577.3	61009.7	insertion	1	-1	homozygous	1	983	17380	92.1	not_applicable	GPI	PDCD2L	11371	yes
FALSE	2970	19	43315819	19	43329852	19	43819971	19	43834004	28431	3.38331e+06	3402929	insertion	1	-1	homozygous	1	985	5591	31.1	not_applicable	-	PRG1	19204	yes
FALSE	2971	19	44442616	19	44452048	19	44946800	19	44956234	28431	4.51859e+06	4.53072e+06	insertion	1	-1	heterozygous	1	-1	2693	14.6	not_applicable	ZNF229	ZNF180	22380	yes
FALSE	2973	19	41100175	19	41108077	19	41606080	19	41613982	28432	1.16682e+06	1.17343e+06	deletion	0.99	-1	heterozygous	1	-1	1293	15.9	not_applicable	-	CYP2A13	3981	yes
FALSE	2974	19	41640639	19	4.16522e+07	19	42147007	19	42156173	28432	1.70715e+06	1.71691e+06	deletion	0.98	-1	heterozygous	1	-1	1846	58.3	not_applicable	-	CEACAM4	13566	yes
FALSE	2975	19	43315819	19	43329852	19	43819971	19	43834004	28432	3.38138e+06	3.401e+06	insertion	1	-1	homozygous	1	985	5590	31.1	not_applicable	-	PRG1	19204	yes
FALSE	2976	19	46820076	19	46838032	19	47323333	19	47341289	9872	512152	533590	insertion	1	-1	heterozygous	1	-1	3482	14.6	not_applicable	SNAR-E	AP2S1	134	yes
FALSE	2977	19	47416951	19	47420964	19	47920208	19	47924221	14871	36272.4	44512.3	insertion	1	-1	homozygous	1	986	4227	92.7	not_applicable	MEIS3;MEIS3	SLC8A2	7058	yes
FALSE	2978	19	47416951	19	47420964	19	47920208	19	47924221	14872	36272.4	44512.3	insertion	1	-1	homozygous	1	986	4227	92.7	not_applicable	MEIS3;MEIS3	SLC8A2	7058	yes
FALSE	2979	19	4.91635e+07	19	49185100	19	49666743	19	49688357	4851	717359	742150	insertion	1	-1	homozygous	1	987	3177	36.4	not_applicable	TRPM4	HRC	8062.5	yes
FALSE	2980	19	4.91635e+07	19	49185100	19	49666743	19	49688357	4852	717359	742150	insertion	1	-1	homozygous	1	987	3177	36.4	not_applicable	TRPM4	HRC	8062.5	yes
FALSE	2981	19	49453259	19	49465756	19	49956516	19	49969013	9551	37914.6	52883.7	insertion	1	-1	heterozygous	1	-1	2472	29.8	not_applicable	ALDH16A1	PIH1D1	1402	yes
FALSE	2986	19	53182889	19	53189753	19	53686142	19	53693006	26351	1325421	1.32943e+06	deletion	1	-1	homozygous	1	989	2852	97.4	not_applicable	ZNF665;DQ588911	ZNF818P	23195	yes
FALSE	2987	19	54042379	19	54065257	19	54545633	19	54568511	26351	452278	470187	deletion	1	-1	heterozygous	1	-1	4969	29.1	not_applicable	VSTM1	TARM1	4690	yes
FALSE	2988	19	54234423	19	54297151	19	54738299	19	54807761	26351	193441	282339	insertion	1	-1	homozygous	1	990	26170	33.8	not_applicable	LILRB5;MIR4752	LILRA5	9919	yes
FALSE	2989	19	54348986	19	54352353	19	54860819	19	54863963	26351	135489	140008	insertion	1	-1	homozygous	1	991	1152	86.8	not_applicable	-	LAIR1	1272	yes
FALSE	2990	19	54398065	19	54417545	19	54909670	19	54928719	26351	67288.1	89659.4	insertion	1	-1	homozygous	1	992	2891	65.6	not_applicable	TTYH1	LENG8	31342	yes
FALSE	2991	19	52384321	19	52391827	19	52887574	19	52895080	26352	2.12389e+06	2.12902e+06	deletion	1	-1	heterozygous	1	-1	2379	23.8	not_applicable	ZNF880;AK097590	AK097590	2500	yes
FALSE	2992	19	53182889	19	53189753	19	53686142	19	53693006	26352	1.33017e+06	1.33419e+06	deletion	1	-1	homozygous	1	989	2851	97.4	not_applicable	ZNF665;DQ588911	ZNF818P	23195	yes
FALSE	2993	19	54234423	19	54297151	19	54738299	19	54807761	26352	193441	282339	insertion	1	-1	homozygous	1	990	26170	33.8	not_applicable	LILRB5;MIR4752	LILRA5	9919	yes
FALSE	2994	19	54348986	19	54352353	19	54860819	19	54863963	26352	135489	140008	insertion	1	-1	homozygous	1	991	1152	86.8	not_applicable	-	LAIR1	1272	yes
FALSE	2995	19	54398065	19	54417545	19	54909670	19	54928719	26352	67288.1	89659.4	insertion	1	-1	homozygous	1	992	2891	65.6	not_applicable	TTYH1	LENG8	31342	yes
FALSE	2997	19	55262376	19	55273432	19	55773744	19	55784800	15680	5058.5	17878.9	insertion	1	-1	homozygous	1	-1	1764	26.5	not_applicable	HSPBP1;X05128	PPP6R1	3707	yes
FALSE	2998	19	55712751	19	5.57233e+07	19	56224117	19	56234644	16751	19007.7	41851.3	insertion	1	-1	heterozygous	1	993	12318	12.6	not_applicable	NLRP9	EPN1	16985	yes
FALSE	2999	19	55712751	19	55784334	19	56224117	19	56295700	16752	19007.7	112833	insertion	1	-1	heterozygous	2	993	22243	13.2	not_applicable	NLRP9;RFPL4A;RFPL4AL1	NLRP11	1063	yes
FALSE	3001	20	640888	20	648446	20	621532	20	629090	24721	3196879	3.20573e+06	insertion	1	-1	heterozygous	1	-1	1291	75.5	not_applicable	SRXN1	JC002055	10096	yes
FALSE	3003	20	1298060	20	1306346	20	1278704	20	1286990	24721	2533168	2.5445e+06	insertion	1	-1	homozygous	1	994	3044	23.8	not_applicable	SNPH	SDCBP2	3565	yes
FALSE	3004	20	1.40706e+06	20	1410251	20	1387705	20	1390895	24721	2.43115e+06	2.43252e+06	deletion	0.99	-1	heterozygous	1	995	1825	43	not_applicable	-	FKBP1A	13890.2	yes
FALSE	3005	20	1568601	20	1610985	20	1549247	20	1591631	24721	2263479	2.27229e+06	deletion	1	-1	homozygous	1	996	33575	85.4	not_applicable	SIRPB1	SIRPD	10905	yes
FALSE	3006	20	1.87573e+06	20	1878618	20	1856377	20	1859264	24721	1.99121e+06	1.99747e+06	insertion	1	-1	heterozygous	1	997	3379	60.9	not_applicable	-	SIRPA	16161	yes
FALSE	3007	20	1298060	20	1306346	20	1278704	20	1286990	24722	2.53132e+06	2.54265e+06	insertion	1	-1	homozygous	1	994	3044	23.8	not_applicable	SNPH	SDCBP2	3565	yes
FALSE	3008	20	1.40706e+06	20	1410251	20	1387705	20	1390895	24722	2.4293e+06	2430667	deletion	0.99	-1	heterozygous	1	995	1824	43	not_applicable	-	FKBP1A	13890.2	yes
FALSE	3009	20	1568601	20	1610985	20	1549247	20	1591631	24722	2.26163e+06	2.27044e+06	deletion	1	-1	homozygous	1	996	33575	85.4	not_applicable	SIRPB1	SIRPD	10905	yes
FALSE	3010	20	1.87573e+06	20	1878618	20	1856377	20	1859264	24722	1.98777e+06	1995622	insertion	1	-1	heterozygous	2	997	4967	60.9	not_applicable	-	SIRPA	16161	yes
FALSE	3011	20	2816932	20	2826033	20	2797578	20	2806679	24722	1.04109e+06	1.04676e+06	deletion	1	-1	heterozygous	1	-1	3435	70.2	not_applicable	TMEM239	C20orf141	1103	yes
TRUE	3012	20	1400045	20	1417401	20	1380689	20	1398045	29021	1.09125e+06	1.10675e+06	deletion	0.99	-1	heterozygous	2	995	1861	43	not_applicable	-	FKBP1A	6874	yes
TRUE	3013	20	1.40706e+06	20	1417401	20	1387705	20	1398045	29022	1.09125e+06	1.0994e+06	deletion	1	-1	heterozygous	2	995	2191	43	not_applicable	-	FKBP1A	13890.2	yes
FALSE	3014	20	1.40706e+06	20	1410251	20	1387705	20	1390895	31472	62625	64164	deletion	0.99	-1	heterozygous	1	995	1651	43.7	not_applicable	-	FKBP1A	13890.2	yes
FALSE	3015	20	1.40706e+06	20	1417401	20	1387705	20	1398045	33880	54878.3	63192.3	deletion	1	-1	heterozygous	2	995	2026	43	not_applicable	-	FKBP1A	13890.2	yes
FALSE	3016	20	1.40706e+06	20	1410251	20	1387705	20	1390895	31471	95935.4	97474.4	deletion	0.99	-1	homozygous	1	995	1651	43.7	not_applicable	-	FKBP1A	13890.2	yes
FALSE	3017	20	4440765	20	4450909	20	4421412	20	4431556	7051	280768	295681	insertion	1	-1	homozygous	1	998	4770	96.7	not_applicable	-	BC039673	9055	yes
FALSE	3018	20	4440765	20	4450909	20	4421412	20	4431556	7052	280768	295681	insertion	1	-1	homozygous	1	998	4770	96.7	not_applicable	-	BC039673	9055	yes
FALSE	3019	20	5287144	20	5290735	20	5267790	20	5271381	3971	32359.6	37600.5	insertion	1	-1	heterozygous	1	-1	1650	57	not_applicable	-	PROKR2	11305	yes
FALSE	3020	20	5720368	20	5745967	20	5701014	20	5726613	3971	467189	495997	insertion	1	-1	homozygous	1	999	3210	60.9	not_applicable	-	C20orf196	4430	yes
FALSE	3021	20	5720368	20	5745967	20	5701014	20	5726613	3972	465521	494330	insertion	1	-1	homozygous	1	999	3210	60.9	not_applicable	-	C20orf196	4430	yes
FALSE	3022	20	7100036	20	7124006	20	7080683	20	7104653	22682	1.11224e+06	1.1302e+06	deletion	1	-1	heterozygous	1	-1	6012	39.7	not_applicable	-	L13714	169879	yes
FALSE	3027	20	13944729	20	13961181	20	13925375	20	13941827	1991	857233	878640	insertion	1	-1	homozygous	1	1003	4956	90.1	not_applicable	SEL1L2;JC171932	U6	12135	yes
FALSE	3030	20	13944729	20	13961181	20	13925375	20	13941827	1992	857233	878640	insertion	1	-1	homozygous	1	1003	4956	90.1	not_applicable	SEL1L2;JC171932	U6	12135	yes
TRUE	3031	20	15275420	20	15542921	20	15256066	20	15523566	31361	142779	153470	deletion	0.97	-1	heterozygous	1	1004	256810	0	not_applicable	MACROD2;DQ593458	JC172329	144048	yes
TRUE	3032	20	15275420	20	15542921	20	15256066	20	15523566	31362	208118	218809	deletion	0.97	-1	heterozygous	1	1004	256810	0	not_applicable	MACROD2;DQ593458	JC172329	144048	yes
FALSE	3034	20	20352195	20	20365346	20	20332839	20	20345990	27641	25117.3	39869.7	insertion	1	-1	homozygous	1	1005	1601	28.5	not_applicable	C20orf26	INSM1	2775	yes
FALSE	3035	20	21117762	20	21124128	20	21098403	20	21104769	27641	792781	800535	insertion	1	-1	homozygous	1	1006	1388	50.3	not_applicable	-	KIZ	1855	yes
FALSE	3036	20	20352195	20	20365346	20	20332839	20	20345990	27642	25117.3	39869.7	insertion	1	-1	homozygous	1	1005	1601	28.5	not_applicable	C20orf26	INSM1	2775	yes
FALSE	3037	20	21117762	20	21124128	20	21098403	20	21104769	27642	792781	800535	insertion	1	-1	homozygous	1	1006	1388	50.3	not_applicable	-	KIZ	1855	yes
FALSE	3038	20	22464952	20	22475225	20	22445590	20	22455863	6961	133798	145451	insertion	1	-1	homozygous	1	1007	1380	68.9	not_applicable	-	RP5-1004I9.1	44310	yes
FALSE	3039	20	22464952	20	22475225	20	22445590	20	22455863	6962	133798	145451	insertion	1	-1	homozygous	1	1007	1380	68.9	not_applicable	-	RP5-1004I9.1	44310	yes
FALSE	3042	20	24833922	20	24841037	20	24814558	20	24821673	2801	181916	190197	insertion	1	-1	homozygous	1	1009	1166	78.1	not_applicable	-	CST7	108193	yes
FALSE	3043	20	24833922	20	24841037	20	24814558	20	24821673	2802	181916	190197	insertion	1	-1	homozygous	1	1009	1166	78.1	not_applicable	-	CST7	108193	yes
FALSE	3055	20	32615085	20	32632946	20	31202887	20	31220748	29681	2.36762e+06	2.38952e+06	insertion	1	-1	homozygous	1	1013	4030	46.4	not_applicable	C20orf203	LOC149950	6194	yes
FALSE	3056	20	34218015	20	34235115	20	32805821	20	32822921	29681	764373	778224	deletion	1	-1	homozygous	1	1014	3249	95.4	not_applicable	DQ580663;DQ588547;DQ601422;DQ571320;DQ578550;DQ588545;BC014056	ASIP	25250	yes
FALSE	3057	20	32615085	20	32632946	20	31202887	20	31220748	29682	2.36762e+06	2.38952e+06	insertion	1	-1	homozygous	1	1013	4030	46.4	not_applicable	C20orf203	LOC149950	6194	yes
FALSE	3058	20	34218015	20	34235115	20	32805821	20	32822921	29682	764373	778224	deletion	1	-1	homozygous	1	1014	3249	95.4	not_applicable	DQ580663;DQ588547;DQ601422;DQ571320;DQ578550;DQ588545;BC014056	ASIP	25250	yes
FALSE	3059	20	36389067	20	36399347	20	35017470	20	35027750	7422	396305	408314	insertion	1	-1	homozygous	1	1015	1729	98	not_applicable	DLGAP4	L13714	61179	yes
FALSE	3060	20	36389067	20	36399347	20	35017470	20	35027750	7421	496142	508150	insertion	1	-1	homozygous	1	1015	1729	98	not_applicable	DLGAP4	L13714	61179	yes
FALSE	3062	20	38353564	20	38365254	20	36981964	20	36993910	8761	358718	371844	insertion	1	-1	homozygous	1	1017	1437	92.1	not_applicable	LBP	DQ580663	12970	yes
FALSE	3063	20	38456409	20	38467325	20	37085052	20	37095968	8761	254283	267359	insertion	1	-1	homozygous	1	1018	2160	96.7	not_applicable	DQ578550;DQ588911;DQ588545;DQ598327	RALGAPB	5481	yes
FALSE	3065	20	38353564	20	38365254	20	36981964	20	36993910	8762	358718	371844	insertion	1	-1	homozygous	1	1017	1437	92.1	not_applicable	LBP	DQ580663	12970	yes
FALSE	3066	20	38456409	20	38467325	20	37085052	20	37095968	8762	254283	267359	insertion	1	-1	homozygous	1	1018	2160	96.7	not_applicable	DQ578550;DQ588911;DQ588545;DQ598327	RALGAPB	5481	yes
FALSE	3068	20	43436747	20	43446898	20	42065387	20	42075538	14741	63278.5	75702.4	insertion	1	-1	heterozygous	1	-1	2273	1.3	not_applicable	-	SRSF6	10966	yes
FALSE	3069	20	43636948	20	43651123	20	42265588	20	42279763	25801	98178.1	109749	deletion	1	-1	heterozygous	1	-1	2604	68.9	not_applicable	IFT52	MYBL2	15896	yes
FALSE	3072	20	44678332	20	44683420	20	43306973	20	43312061	51	271298	274585	deletion	0.99	-1	heterozygous	1	-1	1802	29.1	not_applicable	LINC01260	ADA	26598	yes
FALSE	3074	20	46785131	20	46797061	20	45413770	20	45425700	51	2.3808e+06	2.39427e+06	insertion	1	-1	homozygous	1	1021	1538	96.7	not_applicable	-	SLC2A10	48786	yes
FALSE	3075	20	44651719	20	44678332	20	43280360	20	43306973	52	245872	275038	insertion	0.99	-1	heterozygous	1	-1	2553	13.2	not_applicable	ADA;LINC01260	PKIG	32683	yes
FALSE	3077	20	46785131	20	46797061	20	45413770	20	45425700	52	2386301	2.39977e+06	insertion	1	-1	homozygous	1	1021	1537	96.7	not_applicable	-	SLC2A10	48786	yes
FALSE	3084	20	52079552	20	52104473	20	50696091	20	50721012	22792	309963	337631	insertion	1	-1	heterozygous	1	-1	2748	19.9	not_applicable	-	ZFP64	46805	yes
FALSE	3086	20	55857199	20	55873125	20	54432255	20	54448181	22791	4.08522e+06	4094510	deletion	1	-1	heterozygous	1	-1	6636	47.7	not_applicable	-	DQ594187	60913	yes
FALSE	3089	20	58194218	20	58198279	20	56769274	20	56773335	1011	297930	303680	insertion	1	-1	homozygous	1	1024	1688	97.4	not_applicable	-	C20orf85	33092	yes
FALSE	3090	20	58194218	20	58198279	20	56769274	20	56773335	1012	297172	302921	insertion	1	-1	homozygous	1	1024	1689	97.4	not_applicable	-	C20orf85	33092	yes
FALSE	3091	20	61044847	20	61063795	20	59619903	20	59638851	551	1.01028e+06	1.03562e+06	insertion	1	-1	homozygous	1	1025	6390	2.6	not_applicable	-	LOC100506470	15269	yes
FALSE	3093	20	61044847	20	61063795	20	59619903	20	59638851	552	1.00979e+06	1.03513e+06	insertion	1	-1	homozygous	1	1025	6389	2.6	not_applicable	-	LOC100506470	15269	yes
FALSE	3095	20	61329483	20	61333728	20	59904539	20	59908784	552	1.30363e+06	1.30913e+06	insertion	1	-1	heterozygous	1	-1	1248	57.6	not_applicable	CDH4	JC172092	7042	yes
FALSE	3099	20	61945825	20	61952358	20	60520881	20	60527414	171	1.09263e+06	1096430	deletion	1	-1	homozygous	1	1026	2734	62.3	not_applicable	U02063	MIR1257	1188	yes
FALSE	3100	20	62312810	20	62319804	20	60887866	20	60894860	171	719045	730151	insertion	1	-1	homozygous	1	1027	4113	92.7	not_applicable	LAMA5	ADRM1	3949	yes
FALSE	3101	20	62502662	20	62511093	20	61077718	20	61086149	171	522146	532218	insertion	1	-1	homozygous	1	1028	1641	99.3	not_applicable	-	GATA5	26693	yes
FALSE	3102	20	61945825	20	61952358	20	60520881	20	60527414	172	1.09263e+06	1096430	deletion	1	-1	homozygous	1	1026	2734	62.3	not_applicable	U02063	MIR1257	1188	yes
FALSE	3103	20	62312810	20	62319804	20	60887866	20	60894860	172	719045	730151	insertion	1	-1	homozygous	1	1027	4113	92.7	not_applicable	LAMA5	ADRM1	3949	yes
FALSE	3104	20	62502662	20	62511093	20	61077718	20	61086149	172	522146	532218	insertion	1	-1	homozygous	1	1028	1641	99.3	not_applicable	-	GATA5	26693	yes
FALSE	3105	20	63099270	20	6.31041e+07	20	61730622	20	61735480	7691	218937	227353	insertion	1	-1	homozygous	1	1029	3559	53	not_applicable	HAR1B;HAR1A	RP11-305P22.9	14200	yes
FALSE	3106	20	63166978	20	6.31698e+07	20	61798330	20	61801120	7691	151062	155762	insertion	1	-1	heterozygous	1	1030	1911	66.9	not_applicable	-	MIR124-3	8732.5	yes
FALSE	3107	20	63099270	20	6.31041e+07	20	61730622	20	61735480	7692	220295	228074	insertion	1	-1	homozygous	1	1029	2923	54.3	not_applicable	HAR1B;HAR1A	RP11-305P22.9	14200	yes
FALSE	3108	20	63166978	20	6.31698e+07	20	61798330	20	61801120	7692	151075	157119	insertion	1	-1	heterozygous	2	1030	3256	60.9	not_applicable	-	MIR124-3	8732.5	yes
FALSE	3110	20	63450256	20	63454417	20	62081609	20	62085770	8371	133143	138686	insertion	1	-1	homozygous	1	1032	1381	3.3	not_applicable	KCNQ2	EEF1A2	33595	yes
FALSE	3111	20	63355086	20	63363341	20	61986438	20	61994693	8372	35373.8	44637	insertion	1	-1	homozygous	1	1031	1009	45	not_applicable	CHRNA4	COL20A1	24154	yes
FALSE	3112	20	63450256	20	63454417	20	62081609	20	62085770	8372	133143	138686	insertion	1	-1	homozygous	1	1032	1381	3.3	not_applicable	KCNQ2	EEF1A2	33595	yes
FALSE	3114	20	63692843	20	63697457	20	62324196	20	62328810	7891	128136	141834	insertion	1	-1	heterozygous	1	1034	9085	75.5	not_applicable	RTEL1;TNFRSF6B	ARFRP1	1185	yes
FALSE	3116	20	63692843	20	63697457	20	62324196	20	62328810	7892	128136	136327	insertion	1	-1	heterozygous	2	1034	3577	48.3	not_applicable	RTEL1;TNFRSF6B	ARFRP1	1185	yes
FALSE	3117	20	6.40841e+07	20	64096501	20	62715446	20	62727854	11760	41949.5	57785.9	insertion	1	-1	homozygous	1	-1	3427	86.1	not_applicable	LKAAEAR1;OPRL1	RGS19	4122.5	yes
FALSE	3118	20	6.40841e+07	20	64096501	20	62715446	20	62727854	11760	440830	455168	insertion	1	-1	homozygous	1	-1	1929	55	not_applicable	LKAAEAR1;OPRL1	RGS19	4122.5	yes
FALSE	3131	21	14439191	21	14443151	21	15811512	21	15815472	28051	274266	290717	insertion	1	-1	homozygous	1	1038	12490	96	not_applicable	-	SAMSN1	42077	yes
FALSE	3132	21	14439191	21	14443151	21	15811512	21	15815472	28052	274266	290717	insertion	1	-1	homozygous	1	1038	12490	96	not_applicable	-	SAMSN1	42077	yes
FALSE	3133	21	15200481	21	15220211	21	16572801	21	16592531	25071	355442	372198	deletion	1	-1	homozygous	1	1039	2974	22.5	not_applicable	-	NRIP1	135677	yes
FALSE	3134	21	15200481	21	15220211	21	16572801	21	16592531	25072	355442	372198	deletion	1	-1	homozygous	1	1039	2974	22.5	not_applicable	-	NRIP1	135677	yes
FALSE	3135	21	17713489	21	17740638	21	19085807	21	19112955	12411	95032.9	126464	insertion	1	-1	homozygous	1	1040	4282	92.1	not_applicable	DQ578550;DQ575296;DQ588545	DQ600853	16747	yes
FALSE	3136	21	17713489	21	17740638	21	19085807	21	19112955	12412	97699.9	129131	insertion	1	-1	homozygous	1	1040	4282	92.1	not_applicable	DQ578550;DQ575296;DQ588545	DQ600853	16747	yes
FALSE	3137	21	21082866	21	21108661	21	22455183	21	22480979	30531	1.49033e+06	1.51922e+06	insertion	1	-1	homozygous	1	1041	3094	53.6	not_applicable	NCAM2	LINC00320	279759	yes
FALSE	3138	21	22243007	21	22244486	21	23615327	21	23616806	30531	349405	358016	insertion	1	-1	heterozygous	1	-1	7132	22.5	not_applicable	-	DQ587130	60064	yes
FALSE	3140	21	21082866	21	21108661	21	22455183	21	22480979	30532	1.60925e+06	1.63814e+06	insertion	1	-1	homozygous	1	1041	3094	53.6	not_applicable	NCAM2	LINC00320	279759	yes
FALSE	3144	21	29116755	21	29123795	21	30489076	21	30496116	14200	112318	122547	insertion	1	-1	homozygous	1	-1	3189	55	not_applicable	MAP3K7CL	CCT8	42959	yes
FALSE	3145	21	32029132	21	32031964	21	33401445	21	33404277	4451	597190	601281	insertion	1	-1	homozygous	1	1043	1258	90.1	not_applicable	-	HUNK	25069	yes
FALSE	3146	21	32029132	21	32031964	21	33401445	21	33404277	4452	597190	601281	insertion	1	-1	homozygous	1	1043	1258	90.1	not_applicable	-	HUNK	25069	yes
FALSE	3147	21	32832007	21	32840380	21	34204317	21	34212690	10901	103799	114076	insertion	1	-1	homozygous	1	1044	1904	96.7	not_applicable	-	C21orf62	18265	yes
FALSE	3148	21	32832007	21	32840380	21	34204317	21	34212690	10902	103799	114076	insertion	1	-1	homozygous	1	1044	1904	96.7	not_applicable	-	C21orf62	18265	yes
FALSE	3150	21	33317990	21	33324542	21	34690295	21	34696847	4391	941878	951851	insertion	1	-1	homozygous	1	1045	3421	93.4	not_applicable	-	IFNAR1	367	yes
FALSE	3151	21	3.34641e+07	21	33533959	21	34836374	21	34906265	4391	722672	801506	insertion	1	-1	homozygous	1	1046	8941	76.8	not_applicable	TMEM50B;TMEM50B;DNAJC28;GART	SON	9079	yes
FALSE	3152	21	33317990	21	33324542	21	34690295	21	34696847	4392	941878	951851	insertion	1	-1	homozygous	1	1045	3421	93.4	not_applicable	-	IFNAR1	367	yes
FALSE	3153	21	3.34641e+07	21	33533959	21	34836374	21	34906265	4392	722672	801506	insertion	1	-1	homozygous	1	1046	8941	76.8	not_applicable	TMEM50B;TMEM50B;DNAJC28;GART	SON	9079	yes
FALSE	3155	21	39970216	21	39976188	21	41342143	21	41348115	92	2.4483e+06	2.45635e+06	insertion	1	-1	homozygous	1	1047	2078	66.2	not_applicable	-	DSCAM	36228	yes
FALSE	3158	21	39970216	21	39976188	21	41342143	21	41348115	91	2.4483e+06	2.45635e+06	insertion	1	-1	homozygous	1	1047	2078	66.2	not_applicable	-	DSCAM	36228	yes
FALSE	3162	21	42582649	21	42592213	21	44002759	21	44012323	14441	176307	183859	deletion	1	-1	homozygous	1	1050	2012	42.4	not_applicable	-	SLC37A1	1210	yes
FALSE	3163	21	42582649	21	42592213	21	44002759	21	44012323	14442	176307	183859	deletion	1	-1	homozygous	1	1050	2012	42.4	not_applicable	-	SLC37A1	1210	yes
FALSE	3164	21	42975425	21	42998166	21	44395535	21	44418276	14420	205373	230378	insertion	0.99	-1	homozygous	1	-1	2264	98.7	not_applicable	PKNOX1;JC172250	JC172092	9690	yes
FALSE	3168	21	4.44052e+07	21	44428421	21	45825071	21	45848304	1252	898339	929728	insertion	1	-1	homozygous	1	1052	8154	89.4	not_applicable	TRPM2;TRPM2-AS	LRRC3-AS1	22565	yes
FALSE	3169	21	4.44052e+07	21	44428421	21	45825071	21	45848304	1251	899709	933108	insertion	1	-1	homozygous	1	1052	10165	90.1	not_applicable	TRPM2;TRPM2-AS	LRRC3-AS1	22565	yes
FALSE	3171	21	4.53225e+07	21	45340984	21	46742368	21	46760899	20210	121455	143956	insertion	1	-1	heterozygous	2	1053	3969	6	not_applicable	LINC00316	LOC642852	25099.5	yes
FALSE	3172	21	45796360	21	45801495	21	47216274	21	47221409	3591	338297	346782	insertion	1	-1	homozygous	1	1054	3350	98	not_applicable	-	DQ571320	10468	yes
FALSE	3173	21	4.59145e+07	21	45930397	21	47334390	21	47350311	3591	460448	478235	insertion	1	-1	homozygous	1	1055	1865	78.8	not_applicable	PCBP3	DQ593458	30790	yes
FALSE	3174	21	46164448	21	4.61751e+07	21	47584362	21	47595063	3591	719003	732082	insertion	1	-1	homozygous	1	1056	2379	47.7	not_applicable	SPATC1L	FTCD	8882	yes
FALSE	3175	21	45796360	21	45801495	21	47216274	21	47221409	3592	338297	346782	insertion	1	-1	homozygous	1	1054	3350	98	not_applicable	-	DQ571320	10468	yes
FALSE	3176	21	4.59145e+07	21	45930397	21	47334390	21	47350311	3592	460448	478235	insertion	1	-1	homozygous	1	1055	1865	78.8	not_applicable	PCBP3	DQ593458	30790	yes
FALSE	3177	21	46164448	21	4.61751e+07	21	47584362	21	47595063	3592	719003	732082	insertion	1	-1	homozygous	1	1056	2379	47.7	not_applicable	SPATC1L	FTCD	8882	yes
FALSE	3178	21	46287993	21	4.62991e+07	21	47707907	21	47719027	23921	194121	208912	insertion	1	-1	homozygous	1	1057	3673	56.3	not_applicable	YBEY	C21orf58	2017.5	yes
FALSE	3179	21	46287993	21	46299601	21	47707907	21	47719515	23922	190561	208357	insertion	1	-1	homozygous	1	1057	6189	28.5	not_applicable	YBEY	C21orf58	1529	yes
FALSE	3183	22	17286777	22	17309385	22	17767667	22	17790275	17710	113371	127392	deletion	1	-1	homozygous	1	-1	8588	12.6	not_applicable	-	CECR3	20045	yes
FALSE	3184	22	17622947	22	17664459	22	18105713	22	18147225	17340	262104	300860	deletion	0.99	-1	homozygous	1	-1	2756	2.6	not_applicable	ATP6V1E1;BCL2L13	DQ593458	16	yes
FALSE	3186	22	17873372	22	17882208	22	18356138	22	18364974	15570	93461.3	106048	insertion	1	-1	homozygous	1	-1	3751	25.8	not_applicable	MICAL3	L13714	71921	yes
FALSE	3187	22	20069819	22	2.00771e+07	22	20057342	22	20064603	9751	199930	208956	insertion	1	-1	homozygous	1	1059	1766	11.3	not_applicable	-	DGCR8	3152.5	yes
FALSE	3188	22	20069819	22	2.00771e+07	22	20057342	22	20064603	9752	199930	208956	insertion	1	-1	homozygous	1	1059	1766	11.3	not_applicable	-	DGCR8	3152.5	yes
FALSE	3190	22	20489693	22	2.05078e+07	22	20843980	22	20862038	13581	195974	218560	insertion	1	-1	homozygous	1	1061	4529	100	not_applicable	KLHL22;MED15	DQ587361	1010.5	yes
FALSE	3192	22	20489693	22	2.05078e+07	22	20843980	22	20862038	13582	195974	218560	insertion	1	-1	homozygous	1	1061	4529	100	not_applicable	KLHL22;MED15	DQ587361	1010.5	yes
FALSE	3199	22	23849945	22	23864046	22	24192132	22	24206233	27300	221996	233704	deletion	1	-1	heterozygous	1	1064	2394	69.5	not_applicable	GSTTP2;DQ586451;SLC2A11	DERL3	10934	yes
FALSE	3202	22	23849945	22	2.38704e+07	22	24192132	22	24212573	30000	233125	251246	deletion	1	-1	heterozygous	2	1064	2319	69.5	not_applicable	GSTTP2;DQ586451;SLC2A11	DERL3	10934	yes
FALSE	3206	22	29102032	22	29141124	22	29498020	22	29537112	25611	1.22912e+06	1.27184e+06	insertion	1	-1	homozygous	1	1065	3635	57	not_applicable	KREMEN1	C22orf31	40114	yes
FALSE	3207	22	29102032	22	29141124	22	29498020	22	29537112	25612	1.22912e+06	1.27184e+06	insertion	1	-1	homozygous	1	1065	3635	57	not_applicable	KREMEN1	C22orf31	40114	yes
FALSE	3208	22	31369248	22	3.1388e+07	22	31765234	22	31783962	7822	675768	690301	deletion	1	-1	heterozygous	1	-1	4193	15.2	not_applicable	DQ587130	DRG1	11577.5	yes
FALSE	3210	22	35731686	22	35745486	22	36127733	22	36141533	15642	156130	176159	insertion	1	-1	heterozygous	1	-1	6228	45.7	not_applicable	RBFOX2	APOL5	2205	yes
FALSE	3211	22	36863076	22	36889651	22	37259118	22	37285693	5621	183272	211550	insertion	1	-1	homozygous	1	1066	1703	60.9	not_applicable	NCF4	CSF2RB	23982	yes
FALSE	3212	22	36743886	22	36752828	22	37139931	22	37148872	5622	62646.2	66804.8	deletion	1	-1	heterozygous	1	-1	4784	60.3	not_applicable	-	IFT27	5374	yes
FALSE	3213	22	36863076	22	36889651	22	37259118	22	37285693	5622	178076	206354	insertion	1	-1	homozygous	1	1066	1702	60.9	not_applicable	NCF4	CSF2RB	23982	yes
FALSE	3214	22	38102438	22	38115032	22	38498445	22	38511039	22471	181738	196072	insertion	1	-1	homozygous	1	1067	1740	87.4	not_applicable	BAIAP2L2;PLA2G6;PLA2G6	SLC16A8	19276	yes
FALSE	3215	22	37347904	22	37355294	22	37743945	22	37751334	22472	950161	952028	deletion	1	-1	heterozygous	1	-1	5523	2.6	not_applicable	AK097787	DQ587342	16	yes
FALSE	3216	22	38102438	22	38115032	22	38498445	22	38511039	22472	181738	198098	insertion	1	-1	homozygous	1	1067	3767	86.8	not_applicable	BAIAP2L2;PLA2G6;PLA2G6	SLC16A8	19276	yes
FALSE	3217	22	41296876	22	41301512	22	41692880	22	41697516	5392	1.37442e+06	1382607	insertion	1	-1	homozygous	1	1068	3547	71.5	not_applicable	ZC3H7B	DQ601422	2256	yes
FALSE	3218	22	4.10476e+07	22	41052747	22	41443583	22	41448751	5391	1.12402e+06	1.13147e+06	insertion	1	-1	heterozygous	1	-1	2276	66.2	not_applicable	-	DL490284	12877	yes
FALSE	3219	22	41296876	22	41301512	22	41692880	22	41697516	5391	1.37699e+06	1.38517e+06	insertion	1	-1	homozygous	1	1068	3546	71.5	not_applicable	ZC3H7B	DQ601422	2256	yes
FALSE	3220	22	42318505	22	4.23267e+07	22	42714511	22	42722669	23371	612585	622225	insertion	1	-1	homozygous	1	1069	1484	84.1	not_applicable	-	BC038245	37866.5	yes
FALSE	3223	22	46469325	22	46472467	22	46865222	22	46868364	18142	279307	284512	insertion	1	-1	homozygous	1	1070	2063	98	not_applicable	CELSR1	TRMU	111986	yes
FALSE	3224	22	46469325	22	46472467	22	46865222	22	46868364	18141	212593	217798	insertion	1	-1	homozygous	1	1070	2063	98	not_applicable	CELSR1	TRMU	111986	yes
FALSE	3227	22	47378553	22	47387881	22	47774303	22	47783631	11631	136128	147290	insertion	1	-1	heterozygous	1	-1	1835	99.3	not_applicable	-	LOC101927722	73418	yes
FALSE	3229	22	48615979	22	48621606	22	49011791	22	49017418	12591	253555	260406	insertion	1	-1	homozygous	1	1072	1224	60.3	not_applicable	FAM19A5	LOC284933	68635	yes
FALSE	3230	22	48615979	22	48621606	22	49011791	22	49017418	12592	252678	259530	insertion	1	-1	homozygous	1	1072	1224	60.3	not_applicable	FAM19A5	LOC284933	68635	yes
FALSE	3231	22	4.90259e+07	22	49033808	22	49421730	22	49429620	5201	19868.5	30192.7	insertion	1	-1	heterozygous	1	-1	2433	72.2	not_applicable	-	JC172208	95437	yes
FALSE	3234	22	50347844	22	5.0363e+07	22	50786273	22	50801439	9471	204683	220950	insertion	1	-1	heterozygous	1	-1	1101	23.2	not_applicable	PPP6R2	DENND6B	20785	yes
FALSE	3235	22	50641792	22	50655551	22	51080220	22	51093979	9471	502093	519527	insertion	1	-1	homozygous	1	1074	3675	95.4	not_applicable	-	ARSA	13620	yes
FALSE	3238	22	50641792	22	50655551	22	51080220	22	51093979	9472	502093	519527	insertion	1	-1	homozygous	1	1074	3675	95.4	not_applicable	-	ARSA	13620	yes
FALSE	3243	23	9388660	23	9410729	X	9356700	X	9378769	27011	290198	343842	insertion	0.99	-1	homozygous	1	1076	31576	50.3	not_applicable	DQ595787;DQ597811;DQ595787;DQ595787;DQ580770;DQ595787;DQ580770;DQ597811;DQ595787;DQ580770;DQ595787	DQ595787	430	yes
FALSE	3244	23	9388660	23	9410729	X	9356700	X	9378769	27012	290198	343842	insertion	0.99	-1	homozygous	1	1076	31576	50.3	not_applicable	DQ595787;DQ597811;DQ595787;DQ595787;DQ580770;DQ595787;DQ580770;DQ597811;DQ595787;DQ580770;DQ595787	DQ595787	430	yes
FALSE	3248	23	30642446	23	30654864	X	30660563	X	30672981	27600	700044	714303	insertion	1	-1	homozygous	1	-1	1841	66.2	not_applicable	GK	DQ591044	38806	yes
FALSE	3249	23	33386581	23	33403471	X	33404698	X	33421588	29391	1.88955e+06	1.91206e+06	insertion	1	-1	homozygous	1	1078	5611	13.2	not_applicable	-	DQ593458	102354	yes
FALSE	3250	23	33386581	23	33403471	X	33404698	X	33421588	29392	1.88955e+06	1.91206e+06	insertion	1	-1	homozygous	1	1078	5611	13.2	not_applicable	-	DQ593458	102354	yes
FALSE	3259	23	47087595	23	47091193	X	46946994	X	46950592	28331	658754	665120	insertion	1	-1	homozygous	1	1082	2768	47.7	not_applicable	RGN	JADE3	26354	yes
FALSE	3263	23	47087595	23	47091193	X	46946994	X	46950592	28332	658754	665120	insertion	1	-1	homozygous	1	1082	2768	47.7	not_applicable	RGN	JADE3	26354	yes
FALSE	3266	23	50053230	23	50061678	X	49817839	X	49826335	15941	68036.3	80058.9	insertion	1	-1	homozygous	1	1084	3574	37.7	not_applicable	CLCN5	MIR502	38548	yes
FALSE	3267	23	50053230	23	50061678	X	49817839	X	49826335	15942	92207.5	104230	insertion	1	-1	homozygous	1	1084	3575	37.1	not_applicable	CLCN5	MIR502	38548	yes
FALSE	3270	23	52024537	23	52044042	X	51767633	X	51787138	23941	308351	324550	deletion	1	-1	heterozygous	1	1086	3306	0	not_applicable	-	BC137157	6818	yes
FALSE	3278	23	53743639	23	53758711	X	53770581	X	53785209	5330	191498	209179	insertion	1	-1	homozygous	1	-1	2609	87.4	not_applicable	-	DQ571320	21408	yes
FALSE	3279	23	54888206	23	54907825	X	54914639	X	54934258	5330	1.33547e+06	1.35775e+06	insertion	1	-1	homozygous	1	-1	2661	78.1	not_applicable	-	TRO	12738	yes
FALSE	3281	23	55645251	23	55704107	X	55671684	X	55730540	16971	516425	570959	deletion	1	-1	heterozygous	2	1090	4323	13.9	not_applicable	-	RRAGB	13570	yes
FALSE	3282	23	56770925	23	56776327	X	56797358	X	56802760	7151	142982	159431	insertion	1	-1	homozygous	1	1091	11048	43.7	not_applicable	LOC550643	UQCRBP1	33342	yes
FALSE	3284	23	56770925	23	56776327	X	56797358	X	56802760	7152	142982	159431	insertion	1	-1	homozygous	1	1091	11048	43.7	not_applicable	LOC550643	UQCRBP1	33342	yes
FALSE	3285	23	62963266	23	62975334	X	62182736	X	62194804	12251	103387	118888	insertion	1	-1	homozygous	1	1092	3433	70.2	not_applicable	-	DQ588545	214883	yes
[truncated: 71 more rows]

## Sheet: Fusion Map Alignments
om_id	Fusion Map ID	Fusion Map Gap Size	left alignment GRCh38 Chrom	left alignment GRCh38 Start	left alignment GRCh38 End	left alignment GRCh38 Strand	left alignment HitEnum	right alignment GRCh38 Chrom	right alignment GRCh38 Start	right alignment GRCh38 End	right alignment GRCh38 Strand	right alignment HitEnum	Is Duplicated
QryContigID521_row_1	521	222736	12	75157045	75263951	+	1M1D8M1D8M	13	65401633	65562492	-	4M1D7M1D6M	FALSE
QryContigID522_row_2	522	222736	12	75157045	75263951	+	1M1D8M1D8M	13	65401633	65562492	-	4M1D7M1D6M	TRUE
QryContigID1471_row_3	1471	1.06025e+06	16	74372427	75311090	-	6M2D7M1D1M1D1M2D5M1D21M1D14M2D9M1D2M2D8M1D15M	16	70108116	71025556	+	1M1I3M1D1M2D10M2D12M2D16M1D2M1I3M1D4M1D1M2D1M1D1M1D1M1D2M1D3M1D3M1D1M1D1M1D14M1D4M1D1M1D9M	FALSE
QryContigID1472_row_4	1472	1.06311e+06	16	74372427	75311090	-	7M1D7M1D1M1D1M2D4M1I1M1D21M1D14M2D9M1D2M2D8M1D15M	16	70108116	71025556	+	1M1I3M1D1M2D10M2D13M1D16M1D2M1I2M2D4M1D2M1D1M1D1M1D1M1D2M1D3M1D3M1D1M1D1M1D14M1D6M1D9M	TRUE
QryContigID2691_row_5	2691	6204.9	3	59427543	60375072	+	8M1D12M1D10M1D10M1D3M2D8M1D10M1D1M1D5M1D12M1D6M2D16M1D1M1D3M1D13M2D2M	3	60591648	61029086	+	3M1D8M1D3M2D12M1D5M1D2M1D2M1D12M	FALSE
QryContigID2692_row_6	2692	12567.7	3	59427543	60427734	+	8M1D12M1D10M1D10M1D2M1D1M1D8M1D10M1D1M1D5M1D12M1D6M2D16M1D1M1D3M1D13M2D5M1D1M	3	60541920	61029086	+	2M2D7M1D8M1D3M2D12M1D5M1D2M1D2M1D1M1D10M	FALSE
QryContigID16790_row_7	16790	19664.7	3	116586727	116841507	+	2M2D8M1D11M1I3M1D3M	3	117016693	117092994	+	10M	FALSE
QryContigID19400_row_8	19400	134500	17	31109306	31227170	-	11M	17	31386874	31654023	+	3M1D5M1D4M1D5M1D4M1D1M1D4M1I2M1D1M	FALSE
QryContigID22251_row_9	22251	265341	15	98419616	98546426	-	4M1D6M1D3M1D5M	16	62735070	62816079	+	2M1D1M1D9M	FALSE
QryContigID22252_row_10	22252	281460	15	98419616	98562195	-	4M1D6M1D3M1D6M	16	62735070	62816079	+	2M1D1M1D9M	FALSE
QryContigID22721_row_11	22721	138798	15	90709333	90881314	+	11M2D4M1D6M	15	91870087	92019390	+	8M1D2M1D6M1D3M1D2M	FALSE
QryContigID22721_row_12	22721	244841	15	91870087	92019390	+	8M1D2M1D6M1D3M1D2M	21	41541724	41691432	-	21M	FALSE
QryContigID22721_row_13	22721	112644	21	41541724	41691432	-	21M	1	188188529	188940936	+	2M1I21M1D3M1D3M1D6M1D5M1D8M2D12M	FALSE
QryContigID22721_row_14	22721	599419	1	188188529	188940936	+	2M1I21M1D3M1D3M1D6M1D5M1D8M2D12M	1	188733573	188940936	-	2M2D12M	FALSE
QryContigID22721_row_15	22721	307234	1	188733573	188940936	-	2M2D12M	10	8.43236e+06	8723656	+	18M2D8M1D2M	FALSE
QryContigID22721_row_16	22721	50112.6	10	8.43236e+06	8723656	+	18M2D8M1D2M	21	26860734	27068452	+	1M1D2M1D1M1D1M2D8M1D5M1D3M1D10M	FALSE
QryContigID22722_row_17	22722	138798	15	90709333	90881314	+	11M2D4M1D6M	15	91870087	92019390	+	8M1D2M1D6M1D3M1D2M	TRUE
QryContigID22722_row_18	22722	244841	15	91870087	92019390	+	8M1D2M1D6M1D3M1D2M	21	41541724	41691432	-	21M	TRUE
QryContigID22722_row_19	22722	112644	21	41541724	41691432	-	21M	1	188188529	188940936	+	2M1I21M1D3M1D3M1D6M1D5M1D8M2D12M	TRUE
QryContigID22722_row_20	22722	599419	1	188188529	188940936	+	2M1I21M1D3M1D3M1D6M1D5M1D8M2D12M	1	188733573	188940936	-	2M2D12M	TRUE
QryContigID22722_row_21	22722	307234	1	188733573	188940936	-	2M2D12M	10	8.43236e+06	8723656	+	11M1D1M2D3M2D8M1D2M	TRUE
QryContigID22722_row_22	22722	50112.6	10	8.43236e+06	8723656	+	11M1D1M2D3M2D8M1D2M	21	26860734	27068452	+	1M1D2M1D1M1D2M1D8M1D5M1D3M1D10M	TRUE
QryContigID22951_row_23	22951	401875	1	194829781	195021446	-	6M1I1D8M	1	185876996	186050468	-	2M1D2M1D9M1D3M1D3M	FALSE
QryContigID22951_row_24	22951	220167	1	185876996	186050468	-	2M1D2M1D9M1D3M1D3M	5	41929723	4.21594e+07	+	16M1D3M1D2M1D3M1D1M1D2M	FALSE
QryContigID22952_row_25	22952	401875	1	194829781	195021446	-	6M1D8M	1	185876996	186050468	-	2M1D2M1D9M1D3M1D3M	TRUE
QryContigID22952_row_26	22952	220167	1	185876996	186050468	-	2M1D2M1D9M1D3M1D3M	5	41929723	42141496	+	16M1D3M1D2M1D3M	TRUE
QryContigID23000_row_27	23000	140480	20	42601240	4.2727e+07	-	3M2D3M1D1M1D5M1D4M	17	45636219	45814562	+	18M1D6M1D1M1D1M1D5M	FALSE
QryContigID23121_row_28	23121	754180	12	92470526	92713599	-	12M2D6M1D7M1D2M1D4M1D3M	12	83581219	83721254	-	1M1D5M1D4M1D2M	FALSE
QryContigID23121_row_29	23121	253073	12	83581219	83721254	-	1M1D5M1D4M1D2M	9	76751978	76862539	-	2M1D4M1D11M	FALSE
QryContigID23121_row_30	23121	383623	9	76751978	76862539	-	2M1D4M1D11M	1	186029881	186282560	-	10M1D5M1D1M1D1M	FALSE
QryContigID23121_row_31	23121	736280	1	186029881	186282560	-	10M1D5M1D1M1D1M	10	10467545	10920432	-	4M1D1M1D1M1D3M1D4M1D11M1D4M1D3M1D7M1D13M1D4M	FALSE
QryContigID23121_row_32	23121	710807	10	10467545	10920432	-	4M1D1M1D1M1D3M1D4M1D11M1D4M1D3M1D7M1D13M1D4M	1	171723928	172788320	+	4M1D1M1D9M1D8M1D7M1D5M1D4M1D3M1D18M2D6M1D8M1D6M1D3M1D2M1D3M1D10M1D2M1D3M1D5M1D2M1D1M1D4M1D5M1D1M	FALSE
QryContigID23121_row_33	23121	144710	1	171723928	172788320	+	4M1D1M1D9M1D8M1D7M1D5M1D4M1D3M1D18M2D6M1D8M1D6M1D3M1D2M1D3M1D10M1D2M1D3M1D5M1D2M1D1M1D4M1D5M1D1M	20	428758	605732	+	9M1D6M	FALSE
QryContigID23121_row_34	23121	476514	20	428758	605732	+	9M1D6M	1	188725243	189139998	-	3M2D13M1D1M1D7M1I1M1D3M	FALSE
QryContigID23121_row_35	23121	580778	1	188725243	189139998	-	3M2D13M1D1M1D7M1I1M1D3M	12	68729113	69038541	+	1M1D1M1D4M1D3M1D1M1D9M1D6M1D8M	FALSE
QryContigID23121_row_36	23121	380129	12	68729113	69038541	+	1M1D1M1D4M1D3M1D1M1D9M1D6M1D8M	6	46668030	46882784	-	10M1D6M1D8M	FALSE
QryContigID23122_row_37	23122	736280	1	186029881	186282560	-	10M1D5M1D1M1D1M	10	10467545	10920432	-	4M1D1M1D5M1D4M1D11M1D4M1D3M1D7M1D13M1D4M	TRUE
QryContigID23122_row_38	23122	710807	10	10467545	10920432	-	4M1D1M1D5M1D4M1D11M1D4M1D3M1D7M1D13M1D4M	1	171723928	172788320	+	4M1D1M1D9M1D8M1D7M1D5M1D4M1D3M1D19M1D6M1D8M1D6M1D3M1D2M1D3M1D10M1D2M1D3M1D5M1D2M1D6M1D5M1D1M	TRUE
QryContigID23122_row_39	23122	144710	1	171723928	172788320	+	4M1D1M1D9M1D8M1D7M1D5M1D4M1D3M1D19M1D6M1D8M1D6M1D3M1D2M1D3M1D10M1D2M1D3M1D5M1D2M1D6M1D5M1D1M	20	428758	605732	+	9M1D6M	TRUE
QryContigID23122_row_40	23122	476514	20	428758	605732	+	9M1D6M	1	188725243	189139998	-	3M2D13M1D1M1D7M1I1M1D3M	TRUE
QryContigID23122_row_41	23122	580778	1	188725243	189139998	-	3M2D13M1D1M1D7M1I1M1D3M	12	68729113	69038541	+	1M1D1M1D4M1D5M1D16M1D8M	TRUE
QryContigID23122_row_42	23122	380129	12	68729113	69038541	+	1M1D1M1D4M1D5M1D16M1D8M	6	46668030	46882784	-	10M1D6M1D3M1I5M	TRUE
QryContigID23281_row_43	23281	167434	4	28168263	28352519	-	2M2I3M1D10M	10	3225941	3325035	+	4M1D11M1D3M	FALSE
QryContigID23282_row_44	23282	167434	4	28168263	28352519	-	2M2I3M1D10M	10	3225941	3325035	+	4M1D5M1D5M1D3M	TRUE
QryContigID23601_row_45	23601	463061	20	14429703	14578108	-	4M1D3M1D6M1I1M	15	91764121	91856446	-	1M1D3M1D2M2D10M1D3M	FALSE
QryContigID23601_row_46	23601	335983	15	91764121	91856446	-	1M1D3M1D2M2D10M1D3M	10	8715331	8866627	+	8M1I2D4M	FALSE
QryContigID23601_row_47	23601	206734	10	8715331	8866627	+	8M1I2D4M	12	70651077	70842933	-	4M1D4M1D2M2D6M	FALSE
QryContigID23601_row_48	23601	218738	12	70651077	70842933	-	4M1D4M1D2M2D6M	10	9400464	9596932	+	10M2D5M	FALSE
QryContigID23602_row_49	23602	408399	12	65500763	6.55648e+07	-	11M1D2M	20	14429703	14578108	-	4M1D3M1D6M1I1M	FALSE
QryContigID23602_row_50	23602	463061	20	14429703	14578108	-	4M1D3M1D6M1I1M	15	91764121	91856446	-	1M1D3M1D2M2D10M1D3M	TRUE
QryContigID23602_row_51	23602	335983	15	91764121	91856446	-	1M1D3M1D2M2D10M1D3M	10	8715331	8866627	+	14M	TRUE
QryContigID23602_row_52	23602	206734	10	8715331	8866627	+	14M	12	70651077	70842933	-	4M1D4M1D2M2D6M	TRUE
QryContigID23602_row_53	23602	218738	12	70651077	70842933	-	4M1D4M1D2M2D6M	10	9400464	9596932	+	10M2D2M1I3M	TRUE
QryContigID24061_row_54	24061	639911	9	79969217	80112993	-	16M2I1M	12	84072835	84350003	-	1M1I2M1D4M1D3M1D5M1D2M	FALSE
QryContigID24061_row_55	24061	654405	12	84072835	84350003	-	1M1I2M1D4M1D3M1D5M1D2M	21	41567898	41691432	+	19M	FALSE
QryContigID24061_row_56	24061	250709	21	41567898	41691432	+	19M	15	91863736	92019390	-	10M1D2M1D4M2D4M1D2M	FALSE
QryContigID24061_row_57	24061	461387	15	91863736	92019390	-	10M1D2M1D4M2D4M1D2M	15	90709333	90881314	-	11M2D4M1D6M	FALSE
QryContigID24061_row_58	24061	890704	15	90709333	90881314	-	11M2D4M1D6M	1	188747476	189094325	-	1M2D13M1D1M1D7M1I1M1D2M	FALSE
QryContigID24062_row_59	24062	884894	9	79969217	80359274	-	17M1D6M1D8M1D9M1I1M	12	84072835	84350003	-	1M1I2M1D4M1D3M1D5M1D2M	FALSE
QryContigID24062_row_60	24062	654405	12	84072835	84350003	-	1M1I2M1D4M1D3M1D5M1D2M	21	41567898	41691432	+	19M	TRUE
QryContigID24062_row_61	24062	250709	21	41567898	41691432	+	19M	15	91863736	92019390	-	10M1D2M1D4M2D4M1D2M	TRUE
QryContigID24062_row_62	24062	461387	15	91863736	92019390	-	10M1D2M1D4M2D4M1D2M	15	90709333	90881314	-	11M2D4M1D6M	TRUE
QryContigID24062_row_63	24062	698451	15	90709333	90881314	-	11M2D4M1D6M	1	188940936	189094325	-	1M1I11M1I1M1D2M	FALSE
QryContigID24581_row_64	24581	1135503	4	9212770	9365242	-	10M1I11M	12	69145205	69940974	-	1M1D22M1I4M1D9M1D1M1D24M1D5M2D6M1D5M1D3M1D1M	FALSE
QryContigID24581_row_65	24581	1.13419e+06	12	69145205	69940974	-	1M1D22M1I4M1D9M1D1M1D24M1D5M2D6M1D5M1D3M1D1M	12	83872617	83976928	+	3M1D8M	FALSE
QryContigID24581_row_66	24581	759701	12	83872617	83976928	+	3M1D8M	15	98634751	99364779	+	1M1D10M2D1M1D7M1D11M1D1M1D1M1D9M1D1M1D5M1D4M1D2M1D6M2D7M1D2M1D11M	FALSE
QryContigID24581_row_67	24581	270769	15	98634751	99364779	+	1M1D10M2D1M1D7M1D11M1D1M1D1M1D9M1D1M1D5M1D4M1D2M1D6M2D7M1D2M1D11M	1	186401346	186606143	+	4M1D1M1D9M1D4M1D1M1D3M1D2M1D4M1D3M	FALSE
QryContigID24582_row_68	24582	1135503	4	9212770	9365242	-	10M1I11M	12	69145205	69940974	-	1M1D22M1I4M1D9M1D1M1D24M1D5M2D6M1D5M1D1M1D1M1D1M	TRUE
QryContigID24582_row_69	24582	997592	12	69145205	69940974	-	1M1D22M1I4M1D9M1D1M1D24M1D5M2D6M1D5M1D1M1D1M1D1M	12	95052778	95208898	-	3M1I6M1D6M	FALSE
QryContigID24582_row_70	24582	286825	12	95052778	95208898	-	3M1I6M1D6M	12	83872617	83976928	+	3M1D8M	FALSE
QryContigID24582_row_71	24582	759701	12	83872617	83976928	+	3M1D8M	15	98634751	99364779	+	1M1D10M2D1M1D7M1D11M1D1M1D1M1D9M1D1M1D5M1D4M1D2M1D6M2D7M1D2M1D11M	TRUE
QryContigID24582_row_72	24582	270769	15	98634751	99364779	+	1M1D10M2D1M1D7M1D11M1D1M1D1M1D9M1D1M1D5M1D4M1D2M1D6M2D7M1D2M1D11M	1	186401346	186606143	+	4M1D1M1D9M1D4M1D1M1D3M1D2M1D4M1D3M	TRUE
QryContigID24690_row_73	24690	441361	12	47273104	47479797	-	15M1D3M1D1M1D1M2D1M	12	41234709	41444988	-	20M	FALSE
QryContigID24822_row_74	24822	160704	9	84499897	84615890	+	2M1D2M1D7M1D1M	12	92658661	92756462	-	1M1D2M1D4M1D7M1D3M1D1M	FALSE
QryContigID24981_row_75	24981	532768	12	94946150	95146338	-	5M1D12M2I5M	12	68986513	69085130	+	2M1D12M	FALSE
QryContigID24981_row_76	24981	223074	12	68986513	69085130	+	2M1D12M	9	79969217	80092692	-	16M	FALSE
QryContigID24982_row_77	24982	532768	12	94946150	95146338	-	5M1D17M	12	68986513	69085130	+	2M1D12M	TRUE
QryContigID24982_row_78	24982	223074	12	68986513	69085130	+	2M1D12M	9	79969217	80092692	-	16M	TRUE
QryContigID25451_row_79	25451	1.55349e+06	12	69331514	69519272	+	9M1I4M1D4M	7	4.76085e+07	49153657	-	3M1D1M1D10M1D2M1D5M1D1M1D8M1D2M1D7M1D9M1D5M1D9M1D2M1D1M1D3M2D1M1D6M3D1M1D12M1I10M1I2D2M1D4M1D1M1I1D1M1D2M1D4M1D1M1D7M1D2M1D8M1D11M1D3M1D1M1D4M1D5M1D3M	FALSE
QryContigID25452_row_80	25452	1.55349e+06	12	69331514	69519272	+	9M1I4M1D4M	7	4.76085e+07	49153657	-	5M1D10M1D2M1D5M2D1M1D7M1D10M1D1M1D7M1D5M1D9M1D2M1D1M1D3M2D8M1D1M1D1M1D22M2D2M1D4M1D1M1I1D1M1D2M1D6M1D7M1D2M1D8M1D11M1D3M1D1M1D4M1D5M1D3M	TRUE
QryContigID25871_row_81	25871	2096.5	15	2.30636e+07	24262572	+	5M1D7M1D3M1I1D1M8I3D5M1D7M1D21M1D3M1D2M1D27M1D6M1D9M2D1M	15	24428672	2.5507e+07	+	3M1D4M1D4M1D5M2D8M1D7M3D24M1D6M1D14M1D1M1D7M1D5M1D12M2D11M1D2M	FALSE
QryContigID25872_row_82	25872	2096.5	15	2.30636e+07	24262572	+	5M1D7M1D3M6I3M1D6M1D7M1D21M1D3M1D2M1D27M1D6M1D9M2D1M	15	24428672	2.5507e+07	+	3M1D4M1D4M1D5M2D8M1D8M2D24M1D6M1D14M1D9M1D5M1D12M2D14M	TRUE
QryContigID26301_row_83	26301	223223	7	36862641	38373352	+	3M1D1M1D3M1D4M1D4M1D6M1D3M1D11M1D5M1D2M1D1M1D1M1D17M1D2M1D1M2D1M1D1M1D4M1D10M2D7M1D5M1D4M2D9M1D8M1D4M1D20M1D8M1D4M1D2M1D2M1D1M1D3M1D10M1D12M1D3M1I1M	7	54220546	54322632	-	11M1D1M	FALSE
QryContigID26480_row_84	26480	-6642.1	4	12620587	12711504	+	9M1D2M	4	23824060	23978465	+	1M1D1M1D10M	FALSE
QryContigID26571_row_85	26571	1.44271e+06	7	78702672	79042087	-	4M1D3M1D6M1D5M1D1M1D17M	7	77460308	78523224	-	5M1D4M1D7M1D14M1D7M1D1M1D8M1D5M1D3M1D7M1D2M1D9M1D1M1I8M2D4M	FALSE
QryContigID26572_row_86	26572	1.44271e+06	7	78702672	79042087	-	4M1D3M1D6M1D5M1D1M1D5M1I7M1D4M	7	77460308	78523224	-	5M1D4M1D7M1D14M1D7M1D1M1D8M1D5M1D3M1D7M1D2M1D9M1D1M1I8M2D4M	TRUE
QryContigID26881_row_87	26881	969926	7	40700889	41690370	-	3M1D3M1D2M1D8M2D3M1D1M1D1M2D1M1D7M1D3M1D4M1D3M1D2M1D3M2D2M1D8M1D2M1D2M1D4M1D1M1D5M1I2M1D5M1D2M1D3M1D22M1D6M	7	63519217	63636392	+	1M1D2M1D5M1D4M	FALSE
QryContigID26881_row_88	26881	49974.5	7	63519217	63636392	+	1M1D2M1D5M1D4M	7	100718487	100949356	+	20M	FALSE
QryContigID26881_row_89	26881	1.77878e+06	7	100718487	100949356	+	20M	7	56377698	57943703	-	3M1D37M1D4M2D1M3D1M1D1M1D1M1D1M1D1M1D1M1D3M1D1M1D2M1D9M1D3M1D3M1D1M1D3M1D11M1D3M3D13M1D3M1D1M1D1M1D1M1D8M1D12M2D1M2D3M1D3M1D12M2D1M1D1M	FALSE
QryContigID26882_row_90	26882	969926	7	40700889	41690370	-	3M1D3M1D2M1D8M2D3M1D1M1D1M2D1M1D7M1D3M1D4M1D3M1D2M1D3M2D2M1D5M1D2M1D2M1D2M1D4M1D1M1D7M1D5M1D2M1D33M	7	63519217	63636392	+	1M1D2M1D5M1D4M	TRUE
QryContigID26882_row_91	26882	49974.5	7	63519217	63636392	+	1M1D2M1D5M1D4M	7	100718487	100949356	+	20M	TRUE
QryContigID26882_row_92	26882	1.78486e+06	7	100718487	100949356	+	20M	7	56377698	57943703	-	3M1D7M1D7M1D17M1D3M1D4M2D1M3D1M1D1M1D1M1D1M1D1M1D1M1D2M4D1M1I1M1D9M1D3M1D3M1D1M1D3M1D11M1D3M3D13M1D3M1D1M1D3M1D8M1D13M1D2M1D3M1D3M1D12M1D2M1D1M	TRUE
QryContigID28131_row_93	28131	558379	12	65480287	65625966	-	15M1D7M1D3M	1	186315879	186438582	-	2M1D3M1D6M1D1M1D2M	FALSE
QryContigID28131_row_94	28131	503549	1	186315879	186438582	-	2M1D3M1D6M1D1M1D2M	13	74166838	74349013	-	8M1D6M1D2M1D2M	FALSE
QryContigID28131_row_95	28131	286556	13	74166838	74349013	-	8M1D6M1D2M1D2M	13	68821183	68948351	+	13M	FALSE
QryContigID28132_row_96	28132	558379	12	65480287	65625966	-	15M1D7M1D3M	1	186315879	186438582	-	2M1D3M1D6M1D1M1D2M	TRUE
QryContigID28132_row_97	28132	503549	1	186315879	186438582	-	2M1D3M1D6M1D1M1D2M	13	74166838	74349013	-	4M1D3M1D6M1D2M1D2M	TRUE
QryContigID28132_row_98	28132	286556	13	74166838	74349013	-	4M1D3M1D6M1D2M1D2M	13	68821183	68948351	+	13M	TRUE
QryContigID28901_row_99	28901	25136.6	12	68855279	69382538	+	1M1D16M1D11M1D4M1D20M	4	28600606	28710151	+	2M1D12M	FALSE
QryContigID28902_row_100	28902	45032	12	95064975	95208898	+	1M1I6M1D6M	12	69145205	69382538	+	1M1D20M	FALSE
QryContigID28902_row_101	28902	25136.6	12	69145205	69382538	+	1M1D20M	4	28600606	28710151	+	2M1D12M	TRUE
QryContigID28910_row_102	28910	31729.4	10	10755304	10920432	+	4M1D13M1D4M	1	186029881	186282560	+	10M1D5M1D1M1D1M	FALSE
QryContigID28910_row_103	28910	19502.1	1	186029881	186282560	+	10M1D5M1D1M1D1M	9	76751978	76850572	+	2M1D4M1D10M	FALSE
QryContigID28991_row_104	28991	147699	1	188517013	188772032	+	6M1D5M1D8M2D2M	1	172403578	172558180	+	5M1D3M1D2M1D3M1D9M	FALSE
QryContigID28991_row_105	28991	120723	1	172403578	172558180	+	5M1D3M1D2M1D3M1D9M	15	91971549	92187886	+	2M1D3M1D6M1D18M1D4M	FALSE
QryContigID28991_row_106	28991	124681	15	91971549	92187886	+	2M1D3M1D6M1D18M1D4M	4	12571048	12711504	+	3M1D12M1D2M	FALSE
QryContigID28991_row_107	28991	-6468.5	4	12571048	12711504	+	3M1D12M1D2M	4	23824060	23978465	+	1M1D1M1D10M	TRUE
QryContigID28991_row_108	28991	167117	4	23824060	23978465	+	1M1D1M1D10M	12	68767540	69054440	+	2M1D3M1D1M1D9M1D6M1D10M	FALSE
QryContigID28991_row_109	28991	6309.3	12	68767540	69054440	+	2M1D3M1D1M1D9M1D6M1D10M	12	92633869	92756462	+	5M1D2M1D2M1D1M1D7M1D3M1D1M	FALSE
QryContigID28992_row_110	28992	122565	1	172403578	172558180	+	5M1D3M1D2M1D3M1D9M	15	91974535	92187886	+	4M1D6M1D18M1D4M	TRUE
QryContigID28992_row_111	28992	124680	15	91974535	92187886	+	4M1D6M1D18M1D4M	4	12571048	12711504	+	3M1D2M1D9M1D2M	TRUE
QryContigID28992_row_112	28992	-6468.6	4	12571048	12711504	+	3M1D2M1D9M1D2M	4	23824060	23978465	+	1M1D1M1D10M	TRUE
QryContigID28992_row_113	28992	167117	4	23824060	23978465	+	1M1D1M1D10M	12	68767540	69054440	+	2M1D5M1D9M1D6M1D10M	TRUE
QryContigID28992_row_114	28992	6309.2	12	68767540	69054440	+	2M1D5M1D9M1D6M1D10M	12	92633869	92756462	+	5M1D2M1D4M1D7M1D3M1D1M	TRUE
QryContigID29021_row_115	29021	159741	10	8182911	8348914	+	22M1D2M	13	88672617	88792572	-	3M1D4M1D5M	FALSE
QryContigID29021_row_116	29021	274071	13	88672617	88792572	-	3M1D4M1D5M	12	7.84769e+07	78596850	+	1M1D2M1D1M1D5M1D5M	FALSE
QryContigID29021_row_117	29021	394689	12	7.84769e+07	78596850	+	1M1D2M1D1M1D5M1D5M	20	1327930	1472920	-	10M1D2M1I4D3M1D2M1D1M	FALSE
QryContigID29021_row_118	29021	302228	20	1327930	1472920	-	10M1D2M1I4D3M1D2M1D1M	1	181865653	181960541	+	5M1D7M1D1M	FALSE
QryContigID29021_row_119	29021	23812.5	1	181865653	181960541	+	5M1D7M1D1M	9	84191373	84341474	+	1M1D4M1D10M1D1M	FALSE
QryContigID29021_row_120	29021	341005	9	84191373	84341474	+	1M1D4M1D10M1D1M	9	76578991	76725970	-	9M1D6M	FALSE
QryContigID29021_row_121	29021	658895	9	76578991	76725970	-	9M1D6M	12	69988709	70482277	-	2M1D8M1D5M1D1M1D1M1D8M1D2M1D2M1D19M	FALSE
QryContigID29022_row_122	29022	159741	10	8182911	8348914	+	3M1D18M1D2M	13	88672617	88792572	-	3M1D4M1D5M	TRUE
QryContigID29022_row_123	29022	274071	13	88672617	88792572	-	3M1D4M1D5M	12	7.84769e+07	78596850	+	1M1D2M1D1M1D5M1D5M	TRUE
QryContigID29022_row_124	29022	394689	12	7.84769e+07	78596850	+	1M1D2M1D1M1D5M1D5M	20	1327930	1472920	-	11M1D2M1D1M1D3M1D2M1D1M	TRUE
QryContigID29022_row_125	29022	302228	20	1327930	1472920	-	11M1D2M1D1M1D3M1D2M1D1M	1	181865653	181960541	+	5M1D7M1D1M	TRUE
QryContigID29022_row_126	29022	23812.5	1	181865653	181960541	+	5M1D7M1D1M	9	84191373	84341474	+	1M1D4M1D3M1I7M1D1M	TRUE
QryContigID29022_row_127	29022	341005	9	84191373	84341474	+	1M1D4M1D3M1I7M1D1M	9	76578991	76725970	-	9M1D6M	TRUE
QryContigID29022_row_128	29022	658895	9	76578991	76725970	-	9M1D6M	12	69988709	70505031	-	2M1D8M1D5M1D1M1D1M1D8M1D2M1D2M1D19M1D3M	TRUE
QryContigID29121_row_129	29121	674955	1	172618626	172857294	-	2M1D8M1D6M1D5M1D7M	15	98430140	98573356	-	2M1D6M1D3M1D3M1D4M	FALSE
QryContigID29121_row_130	29121	193020	15	98430140	98573356	-	2M1D6M1D3M1D3M1D4M	1	188314786	188399318	+	12M	FALSE
QryContigID29121_row_131	29121	164172	1	188314786	188399318	+	12M	1	172269862	1.72423e+08	-	5M1D1M1D6M1D4M	FALSE
QryContigID29122_row_132	29122	674955	1	172618626	172857294	-	2M1D5M1D2M1D6M1D5M1D7M	15	98430140	98573356	-	2M1D6M1D3M1D3M1D4M	TRUE
QryContigID29122_row_133	29122	193020	15	98430140	98573356	-	2M1D6M1D3M1D3M1D4M	1	188314786	188399318	+	12M	TRUE
QryContigID29122_row_134	29122	164172	1	188314786	188399318	+	12M	1	172269862	1.72423e+08	-	5M1D1M1D6M1D4M	TRUE
QryContigID29181_row_135	29181	18352.8	5	41732877	41819355	+	14M	1	188725243	188966263	+	3M2D13M	FALSE
QryContigID29181_row_136	29181	14373.1	1	188725243	188966263	+	3M2D13M	15	8.47845e+07	84869090	+	3M1D2M1D9M1D1M	FALSE
QryContigID29182_row_137	29182	18352.8	5	41732877	41819355	+	2M1D11M	1	188725243	188980567	+	3M2D13M2I1M	TRUE
QryContigID29220_row_138	29220	111641	10	7904188	8022295	-	1M1D7M1D6M	1	171723928	171809241	+	4M1D4M1I1M1D4M	FALSE
QryContigID29701_row_139	29701	26595.1	12	68743052	68932589	+	1M1D4M1D3M1D1M1D8M	1	188842769	189017347	+	6M1D1M1D5M	FALSE
QryContigID30411_row_140	30411	441716	16	13920031	14813087	+	19M1D8M2D3M1D6M1D3M1I8M1D1M1D3M1I3M2D15M3D3M1D4M	16	14881983	15352239	-	7M1D6M1D4M1D3M1D6M1D5M1D8M1D5M1D1M	FALSE
QryContigID30411_row_141	30411	741782	16	14881983	15352239	-	7M1D6M1D4M1D3M1D6M1D5M1D8M1D5M1D1M	16	14777904	14902976	-	5M1D7M	FALSE
QryContigID30411_row_142	30411	90111.7	16	14777904	14902976	-	5M1D7M	16	15315750	17768374	+	3M1D4M1D3M1D4M1D12M1D1M1D2M1D3M1D7M1D1M1D2M1D1M1D1M1D2M1I4M1D4M1D15M1D7M2D1M1D9M1D7M1D5M1D2M1I3M1D5M1D4M1D6M2D3M1D4M1D10M1D5M1D3M1D15M1D2M1D16M1D4M1D3M1D1M1D4M1D1M1D6M1D1M2D7M1I13M1D3M1D1M1D2M1D2M1D3M1D1M2D13M2D4M	FALSE
QryContigID30412_row_143	30412	441716	16	13920031	14813087	+	19M1D9M1D3M1D6M1D11M1D1M1D6M2D9M1D5M3D3M1D4M	16	14881983	15352239	-	7M1D6M1D4M1D3M1D6M1D5M1D8M1D5M1D1M	TRUE
QryContigID30412_row_144	30412	741782	16	14881983	15352239	-	7M1D6M1D4M1D3M1D6M1D5M1D8M1D5M1D1M	16	14777904	14902976	-	5M1D7M	TRUE
QryContigID30412_row_145	30412	90111.7	16	14777904	14902976	-	5M1D7M	16	15315750	17768374	+	3M1D4M1D3M1D4M1D4M1D7M1D1M1D2M1D3M1D7M1D1M1D2M1D1M1D1M1D11M1D10M1D4M1D7M2D1M1D9M1D7M1D5M1D2M1I2M2I2D5M1D4M1D7M1D3M2D3M1D10M1D5M1D3M1D15M1D2M1D11M1D4M1D4M1D3M1D1M1D4M1D1M1D4M1D1M1D1M2D7M1I13M1D3M1D1M1D2M1D2M1D3M1D1M2D13M2D4M	TRUE
QryContigID30610_row_146	30610	395754	4	12571048	12711504	-	3M1D12M1D2M	15	92056234	92187886	-	16M1D4M	FALSE
QryContigID31361_row_147	31361	343390	20	15542921	15685924	-	7M1D4M1D3M1I1M	20	15085446	15275420	-	13M1D1M1D1M2D1M1D3M	FALSE
QryContigID31362_row_148	31362	408729	20	15542921	15752173	-	7M1D4M1D3M1I7M1D3M	20	15085446	15275420	-	13M1D1M1D1M2D1M1D3M	FALSE
QryContigID31400_row_149	31400	307130	12	68729113	68865752	-	1M1D1M1D4M1D3M1D1M1D2M	1	188725243	188940936	+	3M2D12M	FALSE
QryContigID31430_row_150	31430	16773.7	1	188314786	188399318	+	12M	1	181865653	181960541	+	5M1D7M1D1M	FALSE
QryContigID31430_row_151	31430	23851.3	1	181865653	181960541	+	5M1D7M1D1M	9	84191373	84385738	+	6M1D10M1D5M	TRUE
QryContigID31441_row_152	31441	301684	1	188931694	189094325	-	3M1D1M1D7M1I1M1D2M	15	92031871	92880024	+	3M1D18M1D13M2D1M1D1M1D1M1I2M1D3M1D13M1D3M2D10M1D4M1D6M1D11M2D7M1D5M1D1M	FALSE
QryContigID31441_row_153	31441	107104	15	92031871	92880024	+	3M1D18M1D13M2D1M1D1M1D1M1I2M1D3M1D13M1D3M2D10M1D4M1D6M1D11M2D7M1D5M1D1M	1	172252383	172535135	+	1M1D6M1D8M1D6M1D3M1D2M1D3M1D5M	FALSE
QryContigID31442_row_154	31442	301684	1	188931694	189094325	-	3M1D1M1D7M1I1M1D2M	15	92031871	92880024	+	3M1D18M1D13M2D1M1D1M1D1M1I2M1D3M1D6M1D6M1D3M2D7M1D2M1D4M1D6M1D11M2D7M1D5M1D1M	TRUE
QryContigID31442_row_155	31442	107104	15	92031871	92880024	+	3M1D18M1D13M2D1M1D1M1D1M1I2M1D3M1D6M1D6M1D3M2D7M1D2M1D4M1D6M1D11M2D7M1D5M1D1M	1	172252383	172535135	+	1M1D6M1D8M1D6M1D3M1D2M1D3M1D5M	TRUE
QryContigID31661_row_156	31661	132470	12	95105377	95206358	-	4M1D5M	15	98275944	98358859	+	6M1D6M1D1M	FALSE
QryContigID31661_row_157	31661	431627	15	98275944	98358859	+	6M1D6M1D1M	20	14466020	14637328	-	1M1D3M1D7M2D1M1I5M	FALSE
QryContigID31661_row_158	31661	169097	20	14466020	14637328	-	1M1D3M1D7M2D1M1I5M	12	70371964	70551681	+	13M2D6M2D1M	FALSE
QryContigID31661_row_159	31661	179234	12	70371964	70551681	+	13M2D6M2D1M	12	70371964	70551681	-	13M1D7M2D1M	FALSE
QryContigID31661_row_160	31661	179234	12	70371964	70551681	-	13M1D7M2D1M	20	14466020	14637328	+	1M1D3M1D8M1D1M1I5M	FALSE
QryContigID31661_row_161	31661	345339	20	14466020	14637328	+	1M1D3M1D8M1D1M1I5M	15	98275944	98358859	-	6M1D6M1D1M	FALSE
QryContigID31661_row_162	31661	603810	15	98275944	98358859	-	6M1D6M1D1M	15	100519712	100633965	-	3M1D4M1D5M1D1M	FALSE
QryContigID31662_row_163	31662	132470	12	95105377	95206358	-	4M1D5M	15	98275944	98358859	+	6M1D6M1D1M	TRUE
QryContigID31662_row_164	31662	431627	15	98275944	98358859	+	6M1D6M1D1M	20	14466020	14637328	-	1M1D3M1D8M1D1M1I5M	TRUE
QryContigID31662_row_165	31662	169097	20	14466020	14637328	-	1M1D3M1D8M1D1M1I5M	12	70371964	70551681	+	13M1D7M2D1M	TRUE
QryContigID31662_row_166	31662	179234	12	70371964	70551681	+	13M1D7M2D1M	12	70371964	70551681	-	13M1D7M2D1M	TRUE
QryContigID31662_row_167	31662	179234	12	70371964	70551681	-	13M1D7M2D1M	20	14466020	14637328	+	1M1D3M1D8M1D1M1I5M	TRUE
QryContigID31662_row_168	31662	345339	20	14466020	14637328	+	1M1D3M1D8M1D1M1I5M	15	98275944	98358859	-	6M1D6M1D1M	TRUE
QryContigID31721_row_169	31721	818330	12	68713897	68910035	-	2M1D1M1D4M1D3M1D1M1D7M	15	8.47845e+07	84922429	-	3M1D2M1D9M2D7M2D1M	FALSE
QryContigID31721_row_170	31721	392357	15	8.47845e+07	84922429	-	3M1D2M1D9M2D7M2D1M	1	188725243	188966263	-	3M2D13M	FALSE
QryContigID31721_row_171	31721	344586	1	188725243	188966263	-	3M2D13M	5	41732877	41819355	-	14M	FALSE
QryContigID31722_row_172	31722	818330	12	68713897	68910035	-	2M1D1M1D4M1D3M1D1M1D7M	15	8.47845e+07	84922429	-	3M1D2M1D9M2D7M1D2M	TRUE
QryContigID31722_row_173	31722	392678	15	8.47845e+07	84922429	-	3M1D2M1D9M2D7M1D2M	1	188725243	188966263	-	3M2D13M	TRUE
QryContigID31722_row_174	31722	344586	1	188725243	188966263	-	3M2D13M	5	41732877	41819355	-	14M	TRUE
QryContigID32710_row_175	32710	188720	12	92633869	92695148	-	5M1D2M1D4M	12	68932589	69054440	-	9M1D10M	FALSE
QryContigID32740_row_176	32740	19719.1	1	186145514	186282560	+	1M1D5M1D1M1D1M	9	76751978	76846498	+	2M1D12M1D1M	TRUE
QryContigID57142_row_177	57142	409361	21	26140206	26262117	+	9M	12	92470526	92713599	-	12M2D6M1D7M1D2M1D2M1D1M1D3M	FALSE
QryContigID57142_row_178	57142	754180	12	92470526	92713599	-	12M2D6M1D7M1D2M1D2M1D1M1D3M	12	83581219	83721254	-	1M1D5M1D4M1D2M	TRUE
QryContigID57142_row_179	57142	225547	12	83581219	83721254	-	1M1D5M1D4M1D2M	9	76779412	76862539	-	11M	FALSE
QryContigID58662_row_180	58662	426654	12	69145205	69382538	-	1M1D20M	12	95064975	95208898	-	1M1I6M1D6M	FALSE

## Sheet: Garsed Fusions
Fusion #	GRCh37 chrom1	GRCh37 start1	GRCh37 strand1	GRCh37 chrom2	GRCh37 start2	GRCh37 strand2	nreads	GRCh37 BND distance	GRCh38 chrom1	GRCh38 pos1	GRCh38 strand1	remap note1	GRCh38 chrom2	GRCh38 pos2	GRCh38 strand2	remap note2	GRCh38 BND distance	Bionano CMap ID	Bionano SV ID	Bionano SV type	within 500 kb as...
1	chr1	171812098	+	chr1	188381898	-	107	16569800	chr1	171842958	+	.	chr1	188412766	-	.	16569808	.	.	.	fusion1
2	chr1	172536228	+	chr1	183836546	-	116	11300318	chr1	172567088	+	.	chr1	183867411	-	.	11300323	.	.	.	fusion2
3	chr1	172586404	+	chr1	172592046	-	63	5642	chr1	172617264	+	.	chr1	172622905	-	.	5641	.	.	.	fusion3
4	chr1	182314285	-	chr1	182315456	-	112	1171	chr1	182345149	-	.	chr1	182346320	-	.	1171	.	.	.	fusion4
5	chr1	185829093	+	chr1	185886913	+	53	57820	chr1	185859961	+	.	chr1	185917781	+	.	57820	.	.	.	fusion5
6	chr1	185955561	+	chr1	188639972	-	115	2684411	chr1	185986429	+	.	chr1	188670840	-	.	2684411	.	.	.	fusion6,fusion7
7	chr1	186262690	+	chr1	188451629	-	65	2188939	chr1	186293558	+	.	chr1	188482497	-	.	2188939	.	.	.	fusion6,fusion7
8	chr1	188360627	+	chr1	188915807	+	8	555180	chr1	188391496	+	.	chr1	188946676	+	.	555180	.	.	.	fusion8,fusion10,fusion11
9	chr1	188377591	-	chr1	188379026	-	10	1435	chr1	188408459	-	.	chr1	188409894	-	.	1435	.	.	.	fusion9,fusion10,fusion11
10	chr1	188382996	+	chr1	188843192	+	74	460196	chr1	188413865	+	.	chr1	188874061	+	.	460196	.	.	.	fusion8,fusion9,fusion10,fusion11
11	chr1	188539521	+	chr1	188540224	-	177	703	chr1	188570390	+	.	chr1	188571092	-	.	702	.	.	.	fusion8,fusion9,fusion10,fusion11
12	chr1	189535852	-	chr1	190767521	+	63	1231669	chr1	189566721	-	.	chr1	190798391	+	.	1231670	.	.	.	fusion12
13	chr1	171688220	-	chr10	7956819	-	24		chr1	171719079	-	.	chr10	7914855	-	.	-	29220	191	translocation_interchr	fusion13
14	chr1	181849745	+	chr10	8469082	+	120		chr1	181880610	+	.	chr10	8427119	+	.	-	.	.	.	fusion14
15	chr1	186412974	+	chr10	10966166	+	24		chr1	186443842	+	.	chr10	10924203	+	.	-	.	.	.	fusion15
16	chr1	188328941	-	chr10	8476184	-	27		chr1	188359809	-	.	chr10	8434220	-	.	-	.	.	.	fusion16,fusion17,fusion19
17	chr1	188383151	-	chr10	8023302	+	134		chr1	188414019	-	.	chr10	7981339	+	.	-	.	.	.	fusion16,fusion17,fusion19
18	chr1	188484373	-	chr10	3279164	+	101		chr1	188515241	-	.	chr10	3236972	+	.	-	.	.	.	fusion18
19	chr1	188741684	+	chr10	8465411	-	45		chr1	188772553	+	.	chr10	8423447	-	.	-	22721,22722	260,261	translocation_interchr	fusion16,fusion17,fusion19,fusion20
20	chr1	188870900	-	chr10	8783739	+	61		chr1	188901768	-	.	chr10	8741776	+	.	-	.	.	.	fusion19,fusion20
21	chr1	188969054	+	chr10	10758822	-	19		chr1	188999923	+	.	chr10	10716858	-	.	-	.	.	.	fusion21,fusion22,fusion23
22	chr1	189097275	-	chr10	11002059	+	21		chr1	189128143	-	.	chr10	10960096	+	.	-	.	.	.	fusion21,fusion22,fusion23
23	chr1	189097315	+	chr10	11002138	+	199		chr1	189128184	+	.	chr10	10960175	+	.	-	.	.	.	fusion21,fusion22,fusion23
24	chr1	171221897	+	chr13	74732479	-	69		chr1	171252758	+	.	chr13	74158341	-	.	-	.	.	.	fusion24,fusion25
25	chr1	171624002	+	chr13	74307809	-	110		chr1	171654862	+	.	chr13	73733671	-	.	-	.	.	.	fusion24,fusion25
26	chr1	186264383	-	chr13	91251859	-	107		chr1	186295250	-	.	chr13	90599604	-	.	-	.	.	.	fusion26
27	chr1	188054878	+	chr13	75358112	-	65		chr1	188085747	+	.	chr13	74783974	-	.	-	.	.	.	fusion27
28	chr1	188601484	+	chr13	89321257	-	97		chr1	188632353	+	.	chr13	88669002	-	.	-	.	.	.	fusion28
29	chr1	194816345	+	chr13	76192730	+	104		chr1	194847215	+	.	chr13	75618594	+	.	-	.	.	.	fusion29
30	chr1	171049328	+	chr15	92568904	-	120		chr1	171080187	+	.	chr15	92025673	-	.	-	.	.	.	fusion30
31	chr1	172415424	-	chr15	99304934	-	15		chr1	172446283	-	.	chr15	98761704	-	.	-	.	.	.	fusion31,fusion32
32	chr1	172559948	+	chr15	99498779	+	132		chr1	172590808	+	.	chr15	98955550	+	.	-	.	.	.	fusion31,fusion32
33	chr1	183858595	+	chr15	101181339	+	118		chr1	183889461	+	.	chr15	100641134	+	.	-	.	.	.	fusion33
34	chr1	186363172	-	chr15	97147444	+	108		chr1	186394039	-	.	chr15	96604214	+	.	-	.	.	.	fusion34
35	chr1	188380086	-	chr15	98970942	-	83		chr1	188410954	-	.	chr15	98427712	-	.	-	29121,29122	246,247	translocation_interchr	fusion35
36	chr1	188973679	-	chr15	99166350	-	66		chr1	189004547	-	.	chr15	98623120	-	.	-	.	.	.	fusion36,fusion37
37	chr1	188989169	+	chr15	99303698	-	112		chr1	189020038	+	.	chr15	98760468	-	.	-	.	.	.	fusion36,fusion37
38	chr1	189603215	+	chr15	74006502	+	95		chr1	189634085	+	.	chr15	73714161	+	.	-	.	.	.	fusion38
39	chr1	171432341	+	chr16	49779876	-	41		chr1	171463202	+	.	chr16	49745964	-	.	-	.	.	.	fusion39
40	chr1	188784387	-	chr20	14537687	+	125		chr1	188815255	-	.	chr20	14557041	+	.	-	.	.	.	fusion40
41	chr1	171411896	-	chr21	28593907	+	16		chr1	171442756	-	.	chr21	27221588	+	.	-	.	.	.	fusion41
42	chr1	172833861	+	chr21	23868319	-	20		chr1	172864721	+	.	chr21	22495998	-	.	-	.	.	.	fusion42
43	chr1	185713687	+	chr21	28012168	+	25		chr1	185744555	+	.	chr21	26639849	+	.	-	.	.	.	fusion43
44	chr1	185750225	-	chr21	27511187	-	36		chr1	185781092	-	.	chr21	26138868	-	.	-	.	.	.	fusion44
45	chr1	186469298	-	chr21	42120222	+	27		chr1	186500165	-	.	chr21	40748296	+	.	-	.	.	.	fusion45
46	chr1	188314343	-	chr21	27787340	-	83		chr1	188345211	-	.	chr21	26415020	-	.	-	.	.	.	fusion46
47	chr1	188641317	-	chr21	42620980	-	10		chr1	188672185	-	.	chr21	41249052	-	.	-	.	.	.	fusion47
48	chr1	189603248	-	chr21	38116620	+	20		chr1	189634117	-	.	chr21	36744319	+	.	-	.	.	.	fusion48
49	chr1	194786563	-	chr21	28703564	+	14		chr1	194817432	-	.	chr21	27331245	+	.	-	.	.	.	fusion49,fusion50
50	chr1	194931153	-	chr21	28657217	+	44		chr1	194962022	-	.	chr21	27284898	+	.	-	.	.	.	fusion49,fusion50
51	chr1	188346441	+	chr3	196700035	-	14		chr1	188377310	+	.	chr3	196973163	-	.	-	.	.	.	fusion51,fusion52
52	chr1	188690148	-	chr3	196707845	+	28		chr1	188721016	-	.	chr3	196980974	+	.	-	.	.	.	fusion51,fusion52
53	chr1	171613113	-	chr4	28511748	+	34		chr1	171643972	-	.	chr4	28510126	+	.	-	.	.	.	fusion53
54	chr1	171804823	-	chr4	11772953	-	35		chr1	171835682	-	.	chr4	11771328	-	.	-	.	.	.	fusion54,fusion55
55	chr1	172215356	-	chr4	11782561	+	102		chr1	172246215	-	.	chr4	11780937	+	.	-	.	.	.	fusion54,fusion55
56	chr1	185892393	-	chr4	9114102	+	47		chr1	185923260	-	.	chr4	9112376	+	.	-	.	.	.	fusion56
57	chr1	185983784	-	chr4	28601485	-	73		chr1	186014651	-	.	chr4	28599862	-	.	-	.	.	.	fusion57,fusion58
58	chr1	186089260	+	chr4	28624902	-	132		chr1	186120128	+	.	chr4	28623279	-	.	-	.	.	.	fusion57,fusion58
59	chr1	188409719	+	chr4	28181946	-	55		chr1	188440588	+	.	chr4	28180323	-	.	-	.	.	.	fusion59
60	chr1	188610754	-	chr4	8430998	-	20		chr1	188641622	-	.	chr4	8429270	-	.	-	.	.	.	fusion60
61	chr1	194992474	+	chr4	25761696	-	91		chr1	195023344	+	.	chr4	25760073	-	.	-	.	.	.	fusion61
62	chr1	183831416	-	chr5	41541679	+	208		chr1	183862281	-	.	chr5	41541577	+	.	-	.	.	.	fusion62
63	chr1	183864101	+	chr5	1328564	-	61		chr1	183894967	+	.	chr5	1328448	-	also maps to chr5_KI270791v1_alt	-	.	.	.	fusion63
64	chr1	185712876	-	chr5	1350090	-	98		chr1	185743743	-	.	chr5	1349974	-	also maps to chr5_KI270791v1_alt	-	.	.	.	fusion64,fusion65
65	chr1	185934258	+	chr5	1389466	-	133		chr1	185965126	+	.	chr5	1389350	-	also maps to chr5_KI270791v1_alt	-	.	.	.	fusion64,fusion65,fusion66
66	chr1	186267448	+	chr5	1341717	+	80		chr1	186298316	+	.	chr5	1341602	+	also maps to chr5_KI270791v1_alt	-	.	.	.	fusion65,fusion66
67	chr1	188693834	-	chr5	41837380	+	113		chr1	188724702	-	.	chr5	41837278	+	.	-	29181,31721,31722,29182	249,251,253,255	translocation_interchr	fusion67
68	chr1	189603466	+	chr5	134210068	-	46		chr1	189634336	+	.	chr5	134874377	-	.	-	.	.	.	fusion68
69	chr1	194808782	-	chr5	41956132	-	70		chr1	194839651	-	.	chr5	41956029	-	.	-	.	.	.	fusion69
70	chr1	188016174	-	chr7	20743973	+	61		chr1	188047042	-	.	chr7	20704350	+	.	-	.	.	.	fusion70
71	chr1	172566186	-	chr9	85961850	+	50		chr1	172597045	-	.	chr9	83346935	+	.	-	.	.	.	fusion71
72	chr1	181944075	+	chr9	86796884	-	73		chr1	181974940	+	.	chr9	84181968	-	.	-	29021,29022,31430	216,218,221	translocation_interchr	fusion72
73	chr1	186021832	-	chr9	86036612	+	73		chr1	186052699	-	.	chr9	83421697	+	.	-	.	.	.	fusion73
74	chr1	186253375	+	chr9	79348925	-	96		chr1	186284243	+	.	chr9	76734008	-	.	-	23121,28910,32740	231,234,236	translocation_interchr	fusion74
75	chr1	188732586	-	chrX	31180933	+	21		chr1	188763454	-	.	chrX	31162816	+	.	-	.	.	.	fusion75
76	chr10	3372606	+	chr10	10897421	-	7	7524815	chr10	3330414	+	.	chr10	10855457	-	.	7525043	.	.	.	fusion76
77	chr10	12560537	+	chr10	12562968	-	104	2431	chr10	12518538	+	.	chr10	12520968	-	.	2430	.	.	.	fusion77
78	chr10	8239354	+	chr13	89820272	-	21		chr10	8197391	+	.	chr13	89168017	-	.	-	.	.	.	fusion78,fusion79
79	chr10	8406151	+	chr13	89469815	+	90		chr10	8364188	+	.	chr13	88817561	+	.	-	29021,29022	1772,1773	translocation_interchr	fusion78,fusion79
80	chr10	8418095	+	chr13	69798688	-	55		chr10	8376132	+	.	chr13	69224555	-	.	-	.	.	.	fusion80
81	chr10	10979008	-	chr13	74857562	-	70		chr10	10937044	-	.	chr13	74283424	-	.	-	.	.	.	fusion81
82	chr10	5171192	+	chr15	92019576	+	29		chr10	5129000	+	.	chr15	91476346	+	.	-	.	.	.	fusion82
83	chr10	8436521	-	chr15	85669542	+	31		chr10	8394557	-	.	chr15	85126311	+	.	-	.	.	.	fusion83
84	chr10	10522814	-	chr15	91619252	+	67		chr10	10480850	-	.	chr15	91076022	+	.	-	.	.	.	fusion84
85	chr10	10842711	+	chr15	99104309	+	77		chr10	10800748	+	.	chr15	98561080	+	.	-	.	.	.	fusion85
86	chr10	12466963	-	chr15	96118160	-	81		chr10	12424963	-	.	chr15	95574930	-	.	-	.	.	.	fusion86
87	chr10	8215617	-	chr16	63000891	-	191		chr10	8173653	-	.	chr16	62966986	-	.	-	.	.	.	fusion87
88	chr10	3372736	+	chr20	14363225	-	38		chr10	3330544	+	.	chr20	14382578	-	.	-	.	.	.	fusion88
89	chr10	10509805	+	chr20	14400893	-	96		chr10	10467842	+	.	chr20	14420246	-	.	-	.	.	.	fusion89
90	chr10	10918693	-	chr20	579474	+	136		chr10	10876729	-	.	chr20	598830	+	.	-	.	.	.	fusion90
91	chr10	12475432	+	chr21	22882889	-	104		chr10	12433433	+	.	chr21	21510567	-	.	-	.	.	.	fusion91
92	chr10	3264351	-	chrX	31193714	+	287		chr10	3222158	-	.	chrX	31175597	+	.	-	.	.	.	fusion92
93	chr13	58573342	+	chr13	73728187	+	26	15154845	chr13	57999208	+	.	chr13	73154050	+	.	15154842	.	.	.	fusion93
94	chr13	62199212	+	chr13	62205876	-	8	6664	chr13	61625079	+	.	chr13	61631742	-	.	6663	.	.	.	fusion94
95	chr13	69526841	+	chr13	74761360	+	100	5234519	chr13	68952709	+	.	chr13	74187223	+	.	5234514	.	.	.	fusion95
96	chr13	74333496	+	chr13	75081612	-	71	748116	chr13	73759359	+	.	chr13	74507474	-	.	748115	.	.	.	fusion96
97	chr13	74619557	+	chr13	89854936	+	44	15235379	chr13	74045420	+	.	chr13	89202682	+	.	15157262	.	.	.	fusion97
98	chr13	76107878	-	chr13	90808121	+	64	14700243	chr13	75533741	-	.	chr13	90155867	+	.	14622126	.	.	.	fusion98
99	chr13	76512211	+	chr13	112718922	-	65	36206711	chr13	75938075	+	.	chr13	112064607	-	.	36126532	.	.	.	fusion99
100	chr13	87612613	+	chr13	91872633	-	27	4260020	chr13	86960358	+	.	chr13	91220378	-	.	4260020	.	.	.	fusion100
101	chr13	69927161	-	chr15	96242381	-	107		chr13	69353028	-	.	chr15	95699151	-	.	-	.	.	.	fusion101
102	chr13	90847323	-	chr15	85647581	+	77		chr13	90195068	-	.	chr15	85104350	+	.	-	.	.	.	fusion102
103	chr13	74251833	+	chr16	49815505	+	111		chr13	73677696	+	.	chr16	49781594	+	.	-	.	.	.	fusion103
104	chr13	109819308	+	chr16	85502314	-	53		chr13	109166960	+	.	chr16	85468707	-	.	-	.	.	.	fusion104
105	chr13	74843741	-	chr20	1456631	+	106		chr13	74269603	-	.	chr20	1475986	+	.	-	.	.	.	fusion105
106	chr13	90857544	+	chr20	431514	-	107		chr13	90205290	+	.	chr20	450869	-	.	-	.	.	.	fusion106
107	chr13	66158706	+	chr21	43098611	+	61		chr13	65584574	+	.	chr21	41678451	+	.	-	.	.	.	fusion107
108	chr13	89811752	+	chr21	28221600	-	31		chr13	89159498	+	.	chr21	26849280	-	.	-	.	.	.	fusion108
109	chr13	74922504	-	chrX	31180878	+	32		chr13	74348366	-	.	chrX	31162761	+	.	-	.	.	.	fusion109
110	chr13	76431195	-	chrX	31180264	+	132		chr13	75857058	-	.	chrX	31162147	+	.	-	.	.	.	fusion110
111	chr15	85588166	-	chr15	92584143	+	22	6995977	chr15	85044934	-	.	chr15	92040913	+	.	6995979	.	.	.	fusion111
112	chr15	92674643	+	chr15	92677064	-	217	2421	chr15	92131413	+	.	chr15	92133833	-	.	2420	28991,28992,31441,31442,30610	2534,2535,2537,2538,2539	deletion	fusion112
113	chr15	101051762	+	chr15	101052295	-	13	533	chr15	100511557	+	.	chr15	100512089	-	.	532	31661	2554	insertion	fusion113
114	chr15	85271120	+	chr16	62983434	+	88		chr15	84727889	+	.	chr16	62949530	+	.	-	.	.	.	fusion114
115	chr15	85669378	-	chr16	70276086	-	8		chr15	85126146	-	.	chr16	70242182	-	.	-	.	.	.	fusion115,fusion116,fusion117
116	chr15	85669597	+	chr16	70276239	+	21		chr15	85126366	+	.	chr16	70242336	+	.	-	.	.	.	fusion115,fusion116,fusion117
117	chr15	85669602	+	chr16	70276060	-	71		chr15	85126371	+	.	chr16	70242156	-	.	-	.	.	.	fusion115,fusion116,fusion117
118	chr15	101067079	-	chr16	49755654	+	9		chr15	100526873	-	.	chr16	49721743	+	.	-	.	.	.	fusion118
119	chr15	85586943	+	chr21	42718344	-	13		chr15	85043712	+	.	chr21	41346416	-	.	-	.	.	.	fusion119
120	chr15	91424747	+	chr21	28212120	-	80		chr15	90881517	+	.	chr21	26839800	-	.	-	.	.	.	fusion120
121	chr15	97061101	-	chr21	42708169	-	29		chr15	96517870	-	.	chr21	41336241	-	.	-	.	.	.	fusion121
122	chr15	98907455	+	chr21	28593029	-	18		chr15	98364226	+	.	chr21	27220709	-	.	-	.	.	.	fusion122
123	chr15	99011938	+	chr21	42446290	+	50		chr15	98468709	+	.	chr21	41074363	+	.	-	.	.	.	fusion123
124	chr15	85669226	-	chrX	31179617	-	37		chr15	85125994	-	.	chrX	31161499	-	.	-	.	.	.	fusion124
125	chr16	56245494	-	chr16	62770064	-	147	6524570	chr16	56211581	-	.	chr16	62736159	-	.	6524578	.	.	.	fusion125
126	chr16	66543906	+	chr16	85506815	+	63	18962909	chr16	66510003	+	.	chr16	85473209	+	.	18963206	.	.	.	fusion126
127	chr16	58345824	+	chrX	31168457	+	140		chr16	58311920	+	.	chrX	31150340	+	.	-	.	.	.	fusion127
128	chr16	70276104	-	chrX	31179771	+	7		chr16	70242200	-	.	chrX	31161654	+	.	-	.	.	.	fusion128
129	chr2	156976471	-	chr5	24677469	+	84		chr2	156119958	-	.	chr5	24677360	+	.	-	.	.	.	fusion129
130	chr20	1389210	+	chr20	1390809	-	97	1599	chr20	1408566	+	.	chr20	1410164	-	.	1598	29021,29022	3012,3013	deletion	fusion130
131	chr20	14478164	+	chr21	38072283	-	83		chr20	14497518	+	.	chr21	36699982	-	.	-	.	.	.	fusion131
132	chr20	14516172	-	chrX	31186363	+	95		chr20	14535525	-	.	chrX	31168246	+	.	-	.	.	.	fusion132
133	chr21	27632933	+	chr21	28242957	+	61	610024	chr21	26260614	+	.	chr21	26870638	+	.	610024	.	.	.	fusion133
134	chr22	18769955	+	chr22	25016254	+	2	6246299	chr22	18782442	+	.	chr22	24620287	+	.	5837845	.	.	.	fusion134
135	chr22	18847167	-	chr22	21469165	-	2	2621998	chr22	18859653	-	also maps to chr22_KI270734v1_random	chr22	21114875	-	.	2255222	.	.	.	fusion135
136	chr22	18871112	+	chr22	20650878	-	4	1779766	chr22	18883599	+	also maps to chr22_KI270734v1_random	chr22	18380575	-	.	-503024	.	.	.	fusion136
137	chr22	22703399	-	chr22	22752645	+	2	49246	chr22	22349048	-	.	chr22	22398310	+	also maps to chr22_KI270875v1_alt	49262	.	.	.	fusion137,fusion138,fusion139
138	chr22	22707587	+	chr22	22730594	-	3	23007	chr22	22353239	+	also maps to chr22_KI270875v1_alt	chr22	22376224	-	also maps to chr22_KI270875v1_alt	22985	.	.	.	fusion137,fusion138,fusion139
139	chr22	23020852	-	chr22	23042593	+	2	21741	chr22	22678378	-	.	chr22	22700108	+	.	21730	.	.	.	fusion137,fusion138,fusion139,fusion140
140	chr22	23241562	-	chr22	23247168	+	2	5606	chr22	22899381	-	.	chr22	22904988	+	.	5607	.	.	.	fusion139,fusion140
141	chr22	23681131	-	chr22	25065214	+	2	1384083	chr22	23338943	-	.	chr22	24669247	+	.	1330304	.	.	.	fusion141
142	chr22	23960001	+	chr22	23964328	-	2	4327	chr22	23617814	+	.	chr22	23622140	-	.	4326	.	.	.	fusion142,fusion143,fusion144
143	chr22	24025658	+	chr22	24027540	-	8	1882	chr22	23683471	+	.	chr22	23685352	-	.	1881	.	.	.	fusion142,fusion143,fusion144
144	chr22	24274190	+	chr22	24311319	-	8	37129	chr22	23932003	+	also maps to chr22_KI270879v1_alt	chr22	23969129	-	also maps to chr22_KI270879v1_alt	37126	.	.	.	fusion142,fusion143,fusion144
145	chr22	25685109	+	chr22	25980531	-	2	295422	chr22	25289142	+	.	chr22	25584563	-	.	295421	.	.	.	fusion145,fusion146
146	chr22	25685396	-	chr22	25982673	+	3	297277	chr22	25289428	-	.	chr22	25586706	+	.	297278	.	.	.	fusion145,fusion146
147	chr22	27168120	+	chr22	27169820	-	8	1700	chr22	26772157	+	.	chr22	26773856	-	.	1699	.	.	.	fusion147
148	chr22	31776417	+	chr22	31780707	-	2	4290	chr22	31380431	+	.	chr22	31384720	-	.	4289	.	.	.	fusion148
149	chr22	37636549	+	chr22	37636702	-	2	153	chr22	37240509	+	.	chr22	37240661	-	.	152	.	.	.	fusion149,fusion150
150	chr22	37744458	+	chr22	37750029	-	12	5571	chr22	37348417	+	.	chr22	37353988	-	.	5571	.	.	.	fusion149,fusion150
151	chr22	39294127	+	chr22	39298697	-	2	4570	chr22	38898122	+	also maps to chr22_GL383583v2_alt	chr22	38902691	-	also maps to chr22_GL383583v2_alt	4569	.	.	.	fusion151
152	chr22	43101404	+	chr22	43102178	-	3	774	chr22	42705398	+	.	chr22	42706171	-	.	773	.	.	.	fusion152
153	chr22	46014050	-	chr22	47986659	-	4	1972609	chr22	45618169	-	.	chr22	47590909	-	.	1972740	.	.	.	fusion153,fusion154
154	chr22	46014101	+	chr22	47986775	+	6	1972674	chr22	45618221	+	.	chr22	47591026	+	.	1972805	.	.	.	fusion153,fusion154
155	chr22	49622600	-	chr22	49624427	+	2	1827	chr22	49226673	-	.	chr22	49228501	+	.	1828	.	.	.	fusion155
156	chr3	192787997	+	chr10	12289492	+	10		chr3	193070208	+	.	chr10	12247493	+	.	-	.	.	.	fusion156
157	chr4	8439592	-	chr10	8755573	-	17		chr4	8437864	-	.	chr10	8713609	-	.	-	.	.	.	fusion157
158	chr4	8392189	+	chr13	69808981	-	106		chr4	8390462	+	.	chr13	69234848	-	.	-	.	.	.	fusion158
159	chr4	11972831	+	chr13	112724014	+	109		chr4	11971207	+	.	chr13	112069700	+	.	-	.	.	.	fusion159
160	chr4	25769580	+	chr15	85262527	-	72		chr4	25767958	+	.	chr15	84719295	-	.	-	.	.	.	fusion160
161	chr4	28724321	+	chr15	96321963	+	74		chr4	28722699	+	.	chr15	95778734	+	.	-	.	.	.	fusion161
162	chr4	28359289	+	chr20	14477254	-	72		chr4	28357667	+	.	chr20	14496607	-	.	-	.	.	.	fusion162
163	chr4	8151632	-	chr21	22887551	+	51		chr4	8149904	-	.	chr21	21515230	+	.	-	.	.	.	fusion163
164	chr4	28437505	-	chr21	42372128	-	28		chr4	28435882	-	.	chr21	41000201	-	.	-	.	.	.	fusion164
165	chr4	11812725	+	chr4	28650680	+	25	16837955	chr4	11811101	+	.	chr4	28649058	+	.	16837957	.	.	.	fusion165
166	chr4	12727575	+	chr4	23846435	-	13	11118860	chr4	12725951	+	.	chr4	23844811	-	.	11118860	28991,28992,26480	765,767,770	translocation_intrachr	fusion166
167	chr4	8375683	-	chr6	114199524	+	58		chr4	8373955	-	.	chr6	113878359	+	.	-	.	.	.	fusion167
168	chr4	9147052	+	chr9	78897304	-	28		chr4	9145326	+	.	chr9	76282387	-	.	-	.	.	.	fusion168
169	chr4	28195353	-	chrX	31187928	-	100		chr4	28193730	-	.	chrX	31169810	-	.	-	.	.	.	fusion169
170	chr5	39841749	+	chr10	10533084	+	107		chr5	39841647	+	.	chr10	10491121	+	.	-	.	.	.	fusion170
171	chr5	41960481	+	chr10	8061313	-	70		chr5	41960379	+	.	chr10	8019349	-	.	-	.	.	.	fusion171,fusion172
172	chr5	42055004	-	chr10	8040088	-	42		chr5	42054901	-	.	chr10	7998124	-	.	-	.	.	.	fusion171,fusion172
173	chr5	42177968	+	chr10	10513276	-	66		chr5	42177866	+	.	chr10	10471312	-	.	-	.	.	.	fusion173,fusion174
174	chr5	42182323	+	chr10	10507508	-	117		chr5	42182221	+	.	chr10	10465544	-	.	-	.	.	.	fusion173,fusion174
175	chr5	1229083	-	chr21	28596240	+	104		chr5	1228967	-	.	chr21	27223921	+	.	-	.	.	.	fusion175
176	chr5	21496348	-	chr21	42882163	+	17		chr5	21496238	-	.	chr21	41510236	+	.	-	.	.	.	fusion176
177	chr5	39837920	-	chr21	42732152	+	77		chr5	39837817	-	.	chr21	41360225	+	.	-	.	.	.	fusion177
178	chr5	41500825	-	chr21	27526160	+	176		chr5	41500722	-	.	chr21	26153842	+	.	-	.	.	.	fusion178
179	chr5	134210061	-	chr21	38116619	+	10		chr5	134874370	-	.	chr21	36744318	+	.	-	.	.	.	fusion179
180	chr5	291385	-	chr5	24665009	-	53	24373624	chr5	291269	-	.	chr5	24664899	-	.	24373630	.	.	.	fusion180
181	chr5	21480280	-	chr5	39440945	+	15	17960665	chr5	21480170	-	.	chr5	39440843	+	.	17960673	.	.	.	fusion181
182	chr5	42166008	+	chr5	42167769	-	65	1761	chr5	42165906	+	.	chr5	42167666	-	.	1760	.	.	.	fusion182
183	chr5	41732208	-	chr6	114212563	+	88		chr5	41732105	-	.	chr6	113891399	+	.	-	.	.	.	fusion183
184	chr5	1056154	+	chr9	87106805	-	134		chr5	1056039	+	also maps to chr5_KI270792v1_alt	chr9	84491889	-	.	-	.	.	.	fusion184
185	chr6	46216905	-	chr10	8988040	+	72		chr6	46249167	-	.	chr10	8946077	+	.	-	.	.	.	fusion185
186	chr6	114178959	-	chr10	10514999	+	225		chr6	113857782	-	.	chr10	10473036	+	.	-	.	.	.	fusion186
187	chr6	45919036	+	chr13	58570015	-	55		chr6	45951299	+	.	chr13	57995880	-	.	-	.	.	.	fusion187
188	chr6	46415774	-	chr13	76558009	+	76		chr6	46448036	-	.	chr13	75983873	+	.	-	.	.	.	fusion188
189	chr6	114148131	+	chr13	109805799	-	32		chr6	113826928	+	.	chr13	109153450	-	.	-	.	.	.	fusion189
190	chr6	46271489	+	chr15	91537524	+	25		chr6	46303752	+	.	chr15	90994294	+	.	-	.	.	.	fusion190
191	chr6	114125204	-	chr21	42148197	-	70		chr6	113804000	-	.	chr21	40776270	-	.	-	.	.	.	fusion191
192	chr7	118067	-	chr7	182806	+	3	64739	chr7	118066	-	also maps to chr7_KI270804v1_alt,chr7_KI270899v1_alt	chr7	182806	+	also maps to chr7_KI270804v1_alt,chr7_KI270899v1_alt	64740	.	.	.	fusion192
193	chr7	945090	-	chr7	946291	+	2	1201	chr7	905452	-	.	chr7	906654	+	.	1202	.	.	.	fusion193,fusion194
194	chr7	1185136	+	chr7	1187657	-	7	2521	chr7	1145500	+	.	chr7	1148020	-	.	2520	.	.	.	fusion193,fusion194
195	chr7	2117092	-	chr7	2118638	+	2	1546	chr7	2077456	-	.	chr7	2079003	+	.	1547	.	.	.	fusion195
196	chr7	2186639	+	chr7	42400297	+	2	40213658	chr7	2147004	+	.	chr7	42360698	+	.	40213694	.	.	.	fusion196
197	chr7	2576224	+	chr7	2716271	+	2	140047	chr7	2536590	+	.	chr7	2676637	+	.	140047	.	.	.	fusion197
198	chr7	4536984	+	chr7	9661491	-	2	5124507	chr7	4497353	+	.	chr7	9621860	-	.	5124507	.	.	.	fusion198
199	chr7	5022775	-	chr7	5770873	-	3	748098	chr7	4983143	-	.	chr7	5731241	-	.	748098	.	.	.	fusion199,fusion200,fusion201
200	chr7	5023074	+	chr7	5771080	+	4	748006	chr7	4983443	+	.	chr7	5731449	+	.	748006	.	.	.	fusion199,fusion200,fusion201
201	chr7	5172425	+	chr7	5873794	+	3	701369	chr7	5132794	+	.	chr7	5834163	+	.	701369	.	.	.	fusion199,fusion200,fusion201,fusion205
202	chr7	5319985	+	chr7	63085396	-	2	57765411	chr7	5280354	+	.	chr7	63625017	-	.	58344663	.	.	.	fusion202,fusion204
203	chr7	5325860	+	chr7	57013737	+	2	51687877	chr7	5286229	+	.	chr7	56946030	+	.	51659801	.	.	.	fusion203
204	chr7	5346512	-	chr7	63026909	+	3	57680397	chr7	5306880	-	.	chr7	63566531	+	.	58259651	.	.	.	fusion202,fusion204
205	chr7	5532951	-	chr7	5534129	-	2	1178	chr7	5493319	-	.	chr7	5494497	-	.	1178	.	.	.	fusion201,fusion205
206	chr7	5923309	+	chr7	97616739	+	4	91693430	chr7	5883678	+	.	chr7	97987427	+	.	92103749	.	.	.	fusion206,fusion207
207	chr7	5923324	-	chr7	97616591	-	2	91693267	chr7	5883692	-	.	chr7	97987278	-	.	92103586	.	.	.	fusion206,fusion207
208	chr7	5947429	+	chr7	6856794	+	5	909365	chr7	5907798	+	.	chr7	6817163	+	.	909365	.	.	.	fusion208,fusion209
209	chr7	5996392	+	chr7	6807726	+	3	811334	chr7	5956761	+	.	chr7	6768095	+	.	811334	.	.	.	fusion208,fusion209
210	chr7	12628451	+	chr7	12634998	-	2	6547	chr7	12588826	+	.	chr7	12595372	-	.	6546	.	.	.	fusion210
211	chr7	13585692	+	chr7	13591236	-	9	5544	chr7	13546067	+	.	chr7	13551610	-	.	5543	.	.	.	fusion211,fusion212
212	chr7	13762889	+	chr7	13763013	-	2	124	chr7	13723264	+	.	chr7	13723387	-	.	123	.	.	.	fusion211,fusion212
213	chr7	17300913	+	chr7	20003890	+	2	2702977	chr7	17261289	+	.	chr7	19964267	+	.	2702978	.	.	.	fusion213
214	chr7	20545992	+	chr7	20545604	-	2	-388	chr7	20506369	+	.	chr7	20505980	-	.	-389	.	.	.	fusion214,fusion215
215	chr7	20748851	+	chr7	20753571	-	21	4720	chr7	20709228	+	.	chr7	20713947	-	.	4719	.	.	.	fusion214,fusion215
216	chr7	22069116	-	chr7	22071593	-	3	2477	chr7	22029497	-	.	chr7	22031974	-	.	2477	.	.	.	fusion216,fusion217
217	chr7	22434849	+	chr7	22436760	-	18	1911	chr7	22395230	+	.	chr7	22397140	-	.	1910	.	.	.	fusion216,fusion217
218	chr7	22548945	+	chr7	35100090	-	2	12551145	chr7	22509326	+	.	chr7	35060477	-	.	12551151	.	.	.	fusion218,fusion219
219	chr7	22560796	+	chr7	35110202	-	2	12549406	chr7	22521177	+	.	chr7	35070589	-	.	12549412	.	.	.	fusion218,fusion219
220	chr7	24038229	+	chr7	24040071	-	12	1842	chr7	23998610	+	.	chr7	24000451	-	.	1841	.	.	.	fusion220
221	chr7	28214298	+	chr7	28214937	-	2	639	chr7	28174679	+	.	chr7	28175317	-	.	638	.	.	.	fusion221
222	chr7	29415300	+	chr7	29415581	-	2	281	chr7	29375684	+	.	chr7	29375964	-	.	280	.	.	.	fusion222
223	chr7	29709556	+	chr7	32783493	+	2	3073937	chr7	29669940	+	.	chr7	32743881	+	.	3073941	.	.	.	fusion223,fusion224
224	chr7	29726317	-	chr7	32766618	-	2	3040301	chr7	29686700	-	.	chr7	32727005	-	.	3040305	.	.	.	fusion223,fusion224
225	chr7	30369726	+	chr7	30369726	+	2	0	chr7	30330110	+	.	chr7	30330110	+	.	0	.	.	.	fusion225
226	chr7	31689328	-	chr7	104369129	-	2	72679801	chr7	31649713	-	.	chr7	104728681	-	.	73078968	.	.	.	fusion226
227	chr7	32390220	+	chr7	32393108	-	15	2888	chr7	32350608	+	.	chr7	32353495	-	.	2887	.	.	.	fusion227
228	chr7	32713673	+	chr7	35048172	-	2	2334499	chr7	32674061	+	.	chr7	35008559	-	.	2334498	.	.	.	fusion228,fusion229,fusion230,fusion231,fusion232,fusion233
229	chr7	32816515	+	chr7	34906131	-	2	2089616	chr7	32776903	+	.	chr7	34866518	-	.	2089615	.	.	.	fusion228,fusion229,fusion230,fusion231,fusion232,fusion233
230	chr7	32819622	+	chr7	34909688	-	2	2090066	chr7	32780010	+	.	chr7	34870075	-	.	2090065	.	.	.	fusion228,fusion229,fusion230,fusion231,fusion232,fusion233
231	chr7	32834090	-	chr7	34933152	+	3	2099062	chr7	32794477	-	.	chr7	34893540	+	.	2099063	.	.	.	fusion228,fusion229,fusion230,fusion231,fusion232,fusion233
232	chr7	32834229	+	chr7	34933209	-	3	2098980	chr7	32794617	+	.	chr7	34893596	-	.	2098979	.	.	.	fusion228,fusion229,fusion230,fusion231,fusion232,fusion233
233	chr7	32894465	+	chr7	34959862	+	2	2065397	chr7	32854853	+	.	chr7	34920250	+	.	2065397	.	.	.	fusion228,fusion229,fusion230,fusion231,fusion232,fusion233
234	chr7	33002903	-	chr7	55792281	-	2	22789378	chr7	32963290	-	.	chr7	55724587	-	.	22761297	.	.	.	fusion234
235	chr7	33898866	+	chr7	33899328	-	3	462	chr7	33859254	+	.	chr7	33859715	-	.	461	.	.	.	fusion235
236	chr7	34087435	+	chr7	70786836	-	2	36699401	chr7	34047823	+	.	chr7	71321849	-	.	37274026	.	.	.	fusion236
237	chr7	35090119	+	chr7	102805581	-	2	67715462	chr7	35050507	+	also maps to chr7_KI270806v1_alt	chr7	103165133	-	.	68114626	.	.	.	fusion237,fusion238
238	chr7	35090134	-	chr7	102805745	+	2	67715611	chr7	35050521	-	also maps to chr7_KI270806v1_alt	chr7	103165298	+	.	68114777	.	.	.	fusion237,fusion238
239	chr7	35231377	-	chr7	89743083	-	3	54511706	chr7	35191764	-	.	chr7	90113768	-	.	54922004	.	.	.	fusion239
240	chr7	38389265	-	chr7	38398476	+	2	9211	chr7	38349663	-	.	chr7	38358875	+	.	9212	26302	1339	deletion	fusion240
241	chr7	38451214	+	chr7	54196368	-	15	15745154	chr7	38411614	+	.	chr7	54128674	-	.	15717060	.	.	.	fusion241
242	chr7	40761651	-	chr7	62976878	-	4	22215227	chr7	40722051	-	.	chr7	63516499	-	.	22794448	.	.	.	fusion242
243	chr7	40879381	+	chr7	40880496	+	7	1115	chr7	40839782	+	.	chr7	40840897	+	.	1115	.	.	.	fusion243,fusion244
244	chr7	40879384	-	chr7	40880480	-	11	1096	chr7	40839784	-	.	chr7	40840880	-	.	1096	.	.	.	fusion243,fusion244
245	chr7	44019215	-	chr7	102173582	+	2	58154367	chr7	43979615	-	.	chr7	102533135	+	.	58553520	.	.	.	fusion245
246	chr7	44045309	-	chr7	76684009	-	2	32638700	chr7	44005709	-	.	chr7	77054691	-	also maps to chr7_KI270809v1_alt	33048982	.	.	.	fusion246
247	chr7	55286822	+	chr7	55289056	-	25	2234	chr7	55219129	+	.	chr7	55221362	-	.	2233	.	.	.	fusion247
248	chr7	55742149	+	chr7	56490646	-	2	748497	chr7	55674456	+	.	chr7	56422952	-	.	748496	.	.	.	fusion248,fusion249,fusion250
249	chr7	55832643	-	chr7	56084854	-	2	252211	chr7	55764949	-	.	chr7	56017160	-	.	252211	.	.	.	fusion248,fusion249,fusion250
250	chr7	56047693	+	chr7	56048107	-	2	414	chr7	55980000	+	.	chr7	55980413	-	.	413	.	.	.	fusion248,fusion249,fusion250
251	chr7	56735274	+	chr7	63701358	+	2	6966084	chr7	56667581	+	.	chr7	64240980	+	.	7573399	.	.	.	fusion251,fusion252
252	chr7	56744877	+	chr7	63685228	+	2	6940351	chr7	56677184	+	.	chr7	64224850	+	.	7547666	.	.	.	fusion251,fusion252
253	chr7	56762036	+	chr7	56769941	-	9	7905	chr7	56694343	+	.	chr7	56702247	-	.	7904	.	.	.	fusion253
254	chr7	57094007	-	chr7	63010885	-	2	5916878	chr7	57026299	-	.	chr7	63550506	-	.	6524207	.	.	.	fusion254,fusion255
255	chr7	57121863	+	chr7	62977015	+	2	5855152	chr7	57054156	+	.	chr7	63516637	+	.	6462481	.	.	.	fusion254,fusion255
256	chr7	57196602	-	chr7	57519013	-	6	322411	chr7	57128894	-	.	chr7	57459306	-	.	330412	.	.	.	fusion256,fusion257,fusion260
257	chr7	57223519	+	chr7	57541493	+	4	317974	chr7	57155812	+	.	chr7	57481787	+	.	325975	.	.	.	fusion256,fusion257,fusion260
258	chr7	57477897	-	chr7	63635844	+	2	6157947	chr7	57418184	-	.	chr7	64175466	+	.	6757282	.	.	.	fusion258,fusion259
259	chr7	57541027	+	chr7	63685110	-	2	6144083	chr7	57481321	+	.	chr7	64224731	-	.	6743410	.	.	.	fusion258,fusion259
260	chr7	57546164	+	chr7	57552108	-	3	5944	chr7	57486458	+	.	chr7	57492401	-	.	5943	.	.	.	fusion256,fusion257,fusion260,fusion262
261	chr7	57724411	-	chr7	57869924	-	3	145513	.	.	-	maps to chr20,chr12,chr7	chr7	57810217	-	.	-	.	.	.
262	chr7	57957715	+	chr7	57959370	-	7	1655	chr7	57898009	+	.	chr7	57899663	-	.	1654	.	.	.	fusion260,fusion262
263	chr7	58004528	+	chr7	100723295	+	2	42718767	chr7	57944822	+	.	chr7	101080014	+	.	43135192	.	.	.	fusion263
264	chr7	61739482	+	chr7	61779429	-	2	39947	.	.	-	maps to chr16,chr7,chr7	chr7	62335177	-	.	-	.	.	.
265	chr7	61967356	-	chr7	61970437	+	35	3081	chr7	62506977	-	.	chr7	62510059	+	.	3082	.	.	.	fusion265,fusion266,fusion267,fusion268,fusion269,fusion270,fusion271,fusion272
266	chr7	61968603	-	chr7	61971261	+	41	2658	chr7	62508224	-	.	chr7	62510883	+	.	2659	.	.	.	fusion265,fusion266,fusion267,fusion268,fusion269,fusion270,fusion271,fusion272
267	chr7	61968731	+	chr7	61968840	-	6	109	chr7	62508353	+	.	chr7	62508461	-	.	108	.	.	.	fusion265,fusion266,fusion267,fusion268,fusion269,fusion270,fusion271,fusion272
268	chr7	61969287	+	chr7	61975373	-	2	6086	chr7	62508909	+	.	chr7	62514994	-	.	6085	.	.	.	fusion265,fusion266,fusion267,fusion268,fusion269,fusion270,fusion271,fusion272
269	chr7	61969301	-	chr7	61973241	+	4	3940	chr7	62508922	-	.	chr7	62512863	+	.	3941	.	.	.	fusion265,fusion266,fusion267,fusion268,fusion269,fusion270,fusion271,fusion272
270	chr7	61969318	+	chr7	61972961	-	6	3643	chr7	62508940	+	.	chr7	62512582	-	.	3642	.	.	.	fusion265,fusion266,fusion267,fusion268,fusion269,fusion270,fusion271,fusion272
271	chr7	61969716	+	chr7	61970195	-	158	479	chr7	62509338	+	.	chr7	62509816	-	.	478	.	.	.	fusion265,fusion266,fusion267,fusion268,fusion269,fusion270,fusion271,fusion272
272	chr7	61970245	-	chr7	61971253	+	2	1008	chr7	62509866	-	.	chr7	62510875	+	.	1009	.	.	.	fusion265,fusion266,fusion267,fusion268,fusion269,fusion270,fusion271,fusion272
273	chr7	62680604	-	chr7	62983270	-	2	302666	chr7	63220225	-	.	chr7	63522891	-	.	302666	.	.	.	fusion273
274	chr7	63123253	+	chr7	100290295	-	15	37167042	chr7	63662875	+	.	chr7	100692671	-	.	37029796	.	.	.	fusion274
275	chr7	64315727	+	chr7	64318119	-	3	2392	chr7	64855349	+	.	chr7	64857740	-	.	2391	.	.	.	fusion275
276	chr7	66584994	-	chr7	72156944	-	2	5571950	chr7	67120006	-	.	chr7	72691953	-	.	5571947	.	.	.	fusion276,fusion277,fusion278,fusion279,fusion280,fusion281,fusion282,fusion284,fusion285
277	chr7	66586600	+	chr7	72155754	+	2	5569154	chr7	67121613	+	.	chr7	72690764	+	.	5569151	.	.	.	fusion276,fusion277,fusion278,fusion279,fusion280,fusion281,fusion282,fusion284,fusion285
278	chr7	66611925	-	chr7	72129159	-	2	5517234	chr7	67146937	-	.	chr7	72664180	-	.	5517243	.	.	.	fusion276,fusion277,fusion278,fusion279,fusion280,fusion281,fusion282,fusion284,fusion285
279	chr7	66612916	+	chr7	72130346	+	2	5517430	chr7	67147929	+	.	chr7	72665368	+	.	5517439	.	.	.	fusion276,fusion277,fusion278,fusion279,fusion280,fusion281,fusion282,fusion284,fusion285
280	chr7	66633146	-	chr7	72109081	-	2	5475935	chr7	67168158	-	.	chr7	72644095	-	.	5475937	.	.	.	fusion276,fusion277,fusion278,fusion279,fusion280,fusion281,fusion282,fusion284,fusion285
281	chr7	66647521	+	chr7	72094661	+	2	5447140	chr7	67182534	+	.	chr7	72629676	+	.	5447142	.	.	.	fusion276,fusion277,fusion278,fusion279,fusion280,fusion281,fusion282,fusion284,fusion285
282	chr7	66681696	-	chr7	72061922	-	4	5380226	chr7	67216708	-	.	chr7	72596936	-	.	5380228	.	.	.	fusion276,fusion277,fusion278,fusion279,fusion280,fusion281,fusion282,fusion284,fusion285
283	chr7	66697507	+	chr7	66699404	-	2	1897	chr7	67232520	+	.	chr7	67234416	-	.	1896	.	.	.	fusion283
284	chr7	66718693	+	chr7	72026296	+	2	5307603	chr7	67253706	+	.	chr7	72561311	+	.	5307605	.	.	.	fusion276,fusion277,fusion278,fusion279,fusion280,fusion281,fusion282,fusion284,fusion285
285	chr7	66722558	+	chr7	72022352	+	2	5299794	chr7	67257571	+	.	chr7	72557367	+	.	5299796	.	.	.	fusion276,fusion277,fusion278,fusion279,fusion280,fusion281,fusion282,fusion284,fusion285
286	chr7	69371411	+	chr7	69572464	+	2	201053	chr7	69906425	+	.	chr7	70107478	+	.	201053	.	.	.	fusion286,fusion287
287	chr7	69487804	-	chr7	69572613	-	5	84809	chr7	70022817	-	.	chr7	70107626	-	.	84809	.	.	.	fusion286,fusion287
288	chr7	70421036	+	chr7	70438881	+	2	17845	chr7	70956050	+	.	chr7	70973895	+	.	17845	.	.	.	fusion288,fusion289
289	chr7	70426183	-	chr7	70438910	-	11	12727	chr7	70961196	-	.	chr7	70973923	-	.	12727	.	.	.	fusion288,fusion289
290	chr7	71211960	+	chr7	71212975	-	8	1015	chr7	71746975	+	.	chr7	71747989	-	.	1014	.	.	.	fusion290
291	chr7	73146464	+	chr7	88818813	-	9	15672349	chr7	73732134	+	.	chr7	89189498	-	.	15457364	.	.	.	fusion291
292	chr7	73764464	+	chr7	93102031	-	7	19337567	chr7	74350134	+	.	chr7	93472718	-	.	19122584	.	.	.	fusion292
293	chr7	73828502	+	chr7	73831429	-	2	2927	chr7	74414172	+	.	chr7	74417098	-	.	2926	.	.	.	fusion293
294	chr7	80801663	+	chr7	80802110	-	2	447	chr7	81172347	+	.	chr7	81172793	-	.	446	.	.	.	fusion294
295	chr7	88377548	+	chr7	108055191	-	2	19677643	chr7	88748234	+	.	chr7	108414746	-	.	19666512	.	.	.	fusion295
296	chr7	88836395	+	chr7	93122969	-	3	4286574	chr7	89207081	+	.	chr7	93493656	-	.	4286575	.	.	.	fusion296
297	chr7	90928077	-	chr7	93124688	+	5	2196611	chr7	91298761	-	.	chr7	93495376	+	.	2196615	.	.	.	fusion297,fusion298,fusion299,fusion300
298	chr7	91080692	+	chr7	92986422	-	3	1905730	chr7	91451377	+	.	chr7	93357109	-	.	1905732	.	.	.	fusion297,fusion298,fusion299,fusion300
299	chr7	91093702	-	chr7	93051930	+	9	1958228	chr7	91464386	-	.	chr7	93422618	+	.	1958232	.	.	.	fusion297,fusion298,fusion299,fusion300
300	chr7	91121614	+	chr7	93109701	+	5	1988087	chr7	91492299	+	.	chr7	93480389	+	.	1988090	.	.	.	fusion297,fusion298,fusion299,fusion300
301	chr7	96475948	+	chr7	96482058	-	2	6110	chr7	96846636	+	.	chr7	96852745	-	.	6109	.	.	.	fusion301
302	chr7	100556063	+	chr7	100607212	-	6	51149	.	.	-	not remappable to GRCh38	chr7	100964164	-	.	-	.	.	.
303	chr9	80825503	-	chr13	76432707	+	99		chr9	78210586	-	.	chr13	75858571	+	.	-	.	.	.	fusion303
304	chr9	86077952	+	chr13	90758635	-	98		chr9	83463037	+	.	chr13	90106380	-	.	-	.	.	.	fusion304
305	chr9	80822114	-	chr15	85669272	-	39		chr9	78207197	-	.	chr15	85126040	-	.	-	.	.	.	fusion305,fusion306,fusion307,fusion308,fusion309
306	chr9	80826628	+	chr15	85669603	+	18		chr9	78211712	+	.	chr15	85126372	+	.	-	.	.	.	fusion305,fusion306,fusion307,fusion308,fusion309
307	chr9	80886038	-	chr15	85669248	-	138		chr9	78271121	-	.	chr15	85126016	-	.	-	.	.	.	fusion305,fusion306,fusion307,fusion308,fusion309
308	chr9	80886246	-	chr15	85669604	+	11		chr9	78271329	-	.	chr15	85126373	+	.	-	.	.	.	fusion305,fusion306,fusion307,fusion308,fusion309
309	chr9	80886534	+	chr15	85669575	+	30		chr9	78271618	+	.	chr15	85126344	+	.	-	.	.	.	fusion305,fusion306,fusion307,fusion308,fusion309
310	chr9	86973631	+	chr15	99469413	-	94		chr9	84358716	+	.	chr15	98926183	-	.	-	.	.	.	fusion310
311	chr9	87118604	-	chr15	96317269	+	56		chr9	84503688	-	.	chr15	95774040	+	.	-	.	.	.	fusion311
312	chr9	79673920	-	chr16	58345217	-	149		chr9	77059003	-	.	chr16	58311312	-	.	-	.	.	.	fusion312
313	chr9	80815539	+	chr16	58345037	+	43		chr9	78200623	+	.	chr16	58311133	+	.	-	.	.	.	fusion313
314	chr9	80816791	-	chr16	62976751	-	43		chr9	78201874	-	.	chr16	62942846	-	.	-	.	.	.	fusion314
315	chr9	80825340	+	chr16	56313858	+	83		chr9	78210424	+	.	chr16	56279946	+	.	-	.	.	.	fusion315,fusion317
316	chr9	80826614	+	chr16	70276241	+	43		chr9	78211698	+	.	chr16	70242338	+	.	-	.	.	.	fusion316
317	chr9	80886081	-	chr16	56313846	+	8		chr9	78271164	-	.	chr16	56279934	+	.	-	.	.	.	fusion315,fusion317
318	chr9	79467753	+	chr21	27839446	+	106		chr9	76852837	+	.	chr21	26467127	+	.	-	.	.	.	fusion318
319	chr9	86016146	-	chr21	28585313	-	61		chr9	83401230	-	.	chr21	27212993	-	.	-	.	.	.	fusion319
320	chr9	86040916	-	chr21	43100300	-	87		chr9	83426000	-	.	chr21	41680139	-	.	-	.	.	.	fusion320
321	chr9	79347773	+	chr9	84175162	-	89	4827389	chr9	76732857	+	.	chr9	81560246	-	.	4827389	.	.	.	fusion321
322	chr9	80822293	+	chr9	80886484	+	7	64191	chr9	78207377	+	.	chr9	78271568	+	.	64191	.	.	.	fusion322,fusion323
323	chr9	80825102	-	chr9	80886080	-	88	60978	chr9	78210185	-	.	chr9	78271163	-	.	60978	.	.	.	fusion322,fusion323
324	chr9	83486840	-	chr9	83498386	-	10	11546	chr9	80871924	-	.	chr9	80883470	-	.	11546	.	.	.	fusion324
325	chr9	80815318	-	chrX	31180193	+	8		chr9	78200401	-	.	chrX	31162076	+	.	-	.	.	.	fusion325,fusion326,fusion327,fusion328,fusion329,fusion330
326	chr9	80815551	+	chrX	31180387	-	32		chr9	78200635	+	.	chrX	31162269	-	.	-	.	.	.	fusion325,fusion326,fusion327,fusion328,fusion329,fusion330
327	chr9	80822115	-	chrX	31180085	+	54		chr9	78207198	-	.	chrX	31161968	+	.	-	.	.	.	fusion325,fusion326,fusion327,fusion328,fusion329,fusion330
328	chr9	80886154	-	chrX	31179869	-	87		chr9	78271237	-	.	chrX	31161751	-	.	-	.	.	.	fusion325,fusion326,fusion327,fusion328,fusion329,fusion330
329	chr9	80886421	+	chrX	31180303	+	104		chr9	78271505	+	.	chrX	31162186	+	.	-	.	.	.	fusion325,fusion326,fusion327,fusion328,fusion329,fusion330
330	chr9	80886438	+	chrX	31179609	-	233		chr9	78271522	+	.	chrX	31161491	-	.	-	.	.	.	fusion325,fusion326,fusion327,fusion328,fusion329,fusion330
331	chr1	171045154	-	chr12	83591488	+	193		chr1	171076012	-	.	chr12	83197709	+	.	-	.	.	.	fusion331
332	chr1	171814466	-	chr12	66053134	+	100		chr1	171845325	-	.	chr12	65659354	+	.	-	.	.	.	fusion332
333	chr1	171816955	+	chr12	70805434	+	109		chr1	171847815	+	.	chr12	70411654	+	.	-	.	.	.	fusion333
334	chr1	172372758	-	chr12	69345534	-	102		chr1	172403617	-	.	chr12	68951753	-	.	-	.	.	.	fusion334,fusion335,fusion336
335	chr1	172392071	+	chr12	69081628	-	101		chr1	172422931	+	.	chr12	68687847	-	.	-	.	.	.	fusion334,fusion335,fusion336
336	chr1	172778260	+	chr12	69191031	-	33		chr1	172809120	+	.	chr12	68797250	-	.	-	.	.	.	fusion334,fusion335,fusion336
337	chr1	178297811	-	chr12	69287274	+	94		chr1	178328675	-	.	chr12	68893494	+	.	-	.	.	.	fusion337
338	chr1	181839347	-	chr12	70799815	-	116		chr1	181870211	-	.	chr12	70406034	-	.	-	.	.	.	fusion338
339	chr1	182317195	-	chr12	78898704	+	105		chr1	182348059	-	.	chr12	78504924	+	.	-	.	.	.	fusion339
340	chr1	182319134	+	chr12	95458758	+	393		chr1	182349999	+	.	chr12	95064982	+	.	-	.	.	.	fusion340
341	chr1	183844726	+	chr12	93039062	+	103		chr1	183875592	+	.	chr12	92645286	+	.	-	.	.	.	fusion341,fusion342
342	chr1	183849795	-	chr12	92863942	-	64		chr1	183880660	-	.	chr12	92470165	-	.	-	.	.	.	fusion341,fusion342
343	chr1	184116343	+	chr12	75783808	+	135		chr1	184147209	+	.	chr12	75390028	+	.	-	.	.	.	fusion343
344	chr1	185683344	-	chr12	75744332	+	92		chr1	185714211	-	.	chr12	75350552	+	.	-	.	.	.	fusion344
345	chr1	185810694	+	chr12	84371091	-	123		chr1	185841562	+	.	chr12	83977311	-	.	-	.	.	.	fusion345,fusion349,fusion350,fusion351
346	chr1	185888078	-	chr12	58025248	+	64		chr1	185918945	-	.	chr12	57631465	+	.	-	.	.	.	fusion346
347	chr1	185994474	-	chr12	78937364	+	117		chr1	186025341	-	.	chr12	78543584	+	.	-	.	.	.	fusion347,fusion352
348	chr1	186005878	+	chr12	69778852	+	30		chr1	186036746	+	.	chr12	69385072	+	.	-	.	.	.	fusion348
349	chr1	186034450	+	chr12	84100098	-	76		chr1	186065318	+	.	chr12	83706318	-	.	-	.	.	.	fusion345,fusion349,fusion350,fusion351
350	chr1	186036580	-	chr12	84315236	+	36		chr1	186067447	-	.	chr12	83921457	+	.	-	.	.	.	fusion345,fusion349,fusion350,fusion351
351	chr1	186280847	-	chr12	83938244	-	19		chr1	186311714	-	.	chr12	83544464	-	.	-	.	.	.	fusion345,fusion349,fusion350,fusion351
352	chr1	186398167	-	chr12	78928701	-	82		chr1	186429034	-	.	chr12	78534920	-	.	-	.	.	.	fusion347,fusion352
353	chr1	186410010	+	chr12	70524952	-	45		chr1	186440878	+	.	chr12	70131171	-	.	-	.	.	.	fusion353,fusion354
354	chr1	186597024	-	chr12	70575671	+	70		chr1	186627891	-	.	chr12	70181891	+	.	-	.	.	.	fusion353,fusion354
355	chr1	186639175	+	chr12	69428589	-	25		chr1	186670043	+	.	chr12	69034808	-	.	-	.	.	.	fusion355
356	chr1	186673283	-	chr12	92924666	+	113		chr1	186704150	-	.	chr12	92530890	+	.	-	.	.	.	fusion356
357	chr1	188272496	-	chr12	95446967	-	198		chr1	188303364	-	.	chr12	95053190	-	.	-	.	.	.	fusion357,fusion361,fusion362,fusion366
358	chr1	188320573	+	chr12	60549547	+	94		chr1	188351442	+	.	chr12	60155766	+	.	-	.	.	.	fusion358
359	chr1	188340299	+	chr12	70655254	-	11		chr1	188371168	+	.	chr12	70261473	-	.	-	.	.	.	fusion359,fusion363,fusion364,fusion370
360	chr1	188369817	+	chr12	69092014	+	136		chr1	188400686	+	.	chr12	68698234	+	.	-	.	.	.	fusion360,fusion371,fusion372,fusion373
361	chr1	188377587	-	chr12	95463888	+	158		chr1	188408455	-	.	chr12	95070112	+	.	-	.	.	.	fusion357,fusion361,fusion362,fusion366
362	chr1	188379022	-	chr12	95463599	-	109		chr1	188409890	-	.	chr12	95069822	-	.	-	.	.	.	fusion357,fusion361,fusion362,fusion366
363	chr1	188379591	-	chr12	70877065	+	85		chr1	188410459	-	.	chr12	70483285	+	.	-	.	.	.	fusion359,fusion363,fusion370
364	chr1	188382067	+	chr12	70296331	-	69		chr1	188412936	+	.	chr12	69902550	-	.	-	.	.	.	fusion359,fusion364
365	chr1	188383181	+	chr12	82575401	+	43		chr1	188414050	+	.	chr12	82181622	+	.	-	.	.	.	fusion365
366	chr1	188386300	+	chr12	95449113	-	294		chr1	188417169	+	.	chr12	95055336	-	.	-	.	.	.	fusion357,fusion361,fusion362,fusion366
367	chr1	188539045	-	chr12	83702567	+	69		chr1	188569913	-	.	chr12	83308788	+	.	-	.	.	.	fusion367,fusion377
368	chr1	188626459	+	chr12	84380515	-	78		chr1	188657328	+	.	chr12	83986735	-	.	-	.	.	.	fusion368
369	chr1	188640368	+	chr12	58923910	+	109		chr1	188671237	+	.	chr12	58530127	+	.	-	.	.	.	fusion369
370	chr1	188641432	+	chr12	70863964	-	7		chr1	188672301	+	.	chr12	70470183	-	.	-	.	.	.	fusion359,fusion363,fusion370,fusion376
371	chr1	188698638	+	chr12	69306555	+	116		chr1	188729507	+	.	chr12	68912775	+	.	-	.	.	.	fusion360,fusion371,fusion372,fusion373,fusion375
372	chr1	188701170	-	chr12	69445391	+	11		chr1	188732038	-	.	chr12	69051611	+	.	-	.	.	.	fusion360,fusion371,fusion372,fusion373,fusion375
373	chr1	188831742	+	chr12	69410816	-	67		chr1	188862611	+	.	chr12	69017035	-	.	-	29701	263	translocation_interchr	fusion360,fusion371,fusion372,fusion373,fusion375
374	chr1	188833509	-	chr12	60541347	-	73		chr1	188864377	-	.	chr12	60147565	-	.	-	.	.	.	fusion374
375	chr1	188934063	+	chr12	69383116	+	28		chr1	188964932	+	.	chr12	68989336	+	.	-	.	.	.	fusion371,fusion372,fusion373,fusion375
376	chr1	188937665	+	chr12	71283356	-	109		chr1	188968534	+	.	chr12	70889575	-	.	-	.	.	.	fusion370,fusion376
377	chr1	188993823	-	chr12	83573888	-	82		chr1	189024691	-	.	chr12	83180108	-	.	-	.	.	.	fusion367,fusion377
378	chr1	194786593	-	chr12	69082574	-	19		chr1	194817462	-	.	chr12	68688793	-	.	-	.	.	.	fusion378
379	chr10	3294114	+	chr12	83701257	-	47		chr10	3251922	+	.	chr12	83307477	-	.	-	.	.	.	fusion379
380	chr10	7951479	+	chr12	69777869	+	67		chr10	7909516	+	.	chr12	69384089	+	.	-	.	.	.	fusion380,fusion384
381	chr10	8015395	-	chr12	84101005	+	87		chr10	7973431	-	.	chr12	83707226	+	.	-	.	.	.	fusion381
382	chr10	8061093	+	chr12	75593983	+	42		chr10	8019130	+	.	chr12	75200203	+	.	-	.	.	.	fusion382,fusion388
383	chr10	8221839	+	chr12	74324418	+	49		chr10	8179876	+	.	chr12	73930638	+	.	-	.	.	.	fusion383,fusion387
384	chr10	8391892	-	chr12	69444307	+	34		chr10	8349928	-	.	chr12	69050527	+	.	-	.	.	.	fusion380,fusion384,fusion389
385	chr10	8414008	+	chr12	95528620	-	112		chr10	8372045	+	.	chr12	95134843	-	.	-	.	.	.	fusion385
386	chr10	8472556	+	chr12	58026616	-	44		chr10	8430593	+	.	chr12	57632832	-	.	-	.	.	.	fusion386
387	chr10	8481286	-	chr12	74255513	-	28		chr10	8439322	-	.	chr12	73861732	-	.	-	.	.	.	fusion383,fusion387,fusion392
388	chr10	8483956	-	chr12	75593568	-	106		chr10	8441992	-	.	chr12	75199787	-	.	-	.	.	.	fusion382,fusion388,fusion391
389	chr10	8494855	+	chr12	69392546	+	26		chr10	8452892	+	.	chr12	68998766	+	.	-	.	.	.	fusion384,fusion389
390	chr10	8727643	+	chr12	82511238	-	62		chr10	8685680	+	.	chr12	82117458	-	.	-	.	.	.	fusion390
391	chr10	8755509	-	chr12	75626397	+	65		chr10	8713545	-	.	chr12	75232617	+	.	-	.	.	.	fusion388,fusion391
392	chr10	8761126	-	chr12	74255210	+	84		chr10	8719162	-	.	chr12	73861430	+	.	-	.	.	.	fusion387,fusion392
393	chr10	8882453	+	chr12	66249305	+	91		chr10	8840490	+	.	chr12	65855525	+	.	-	.	.	.	fusion393
394	chr10	8917482	+	chr12	71242780	+	78		chr10	8875519	+	.	chr12	70849000	+	.	-	23601,23602	1781,1785	translocation_interchr	fusion394
395	chr10	10514660	-	chr12	83583368	-	24		chr10	10472696	-	.	chr12	83189588	-	.	-	.	.	.	fusion395,fusion401,fusion406
396	chr10	10514661	-	chr12	71622326	+	14		chr10	10472697	-	.	chr12	71228546	+	.	-	.	.	.	fusion396,fusion402,fusion403,fusion404
397	chr10	10518524	+	chr12	75601526	-	68		chr10	10476561	+	.	chr12	75207745	-	.	-	.	.	.	fusion397
398	chr10	10579899	-	chr12	69410799	+	115		chr10	10537935	-	.	chr12	69017019	+	.	-	.	.	.	fusion398,fusion400
399	chr10	10651713	+	chr12	58031546	+	102		chr10	10609750	+	.	chr12	57637763	+	.	-	.	.	.	fusion399
400	chr10	10720142	-	chr12	69330490	+	25		chr10	10678178	-	.	chr12	68936710	+	.	-	.	.	.	fusion398,fusion400
401	chr10	10771698	+	chr12	83958324	+	7		chr10	10729735	+	.	chr12	83564545	+	.	-	.	.	.	fusion395,fusion401,fusion406
402	chr10	10894636	-	chr12	71622322	+	16		chr10	10852672	-	.	chr12	71228542	+	.	-	.	.	.	fusion396,fusion402,fusion403,fusion404
403	chr10	10894758	+	chr12	71622198	-	7		chr10	10852795	+	.	chr12	71228417	-	.	-	.	.	.	fusion396,fusion402,fusion403,fusion404
404	chr10	10894767	-	chr12	71626917	-	76		chr10	10852803	-	.	chr12	71233136	-	.	-	.	.	.	fusion396,fusion402,fusion403,fusion404
405	chr10	10894769	-	chr12	78862502	+	17		chr10	10852805	-	.	chr12	78468722	+	.	-	.	.	.	fusion405
406	chr10	10894895	+	chr12	83948303	+	9		chr10	10852932	+	.	chr12	83554524	+	.	-	.	.	.	fusion395,fusion401,fusion406
407	chr10	10894959	+	chr12	74462643	+	9		chr10	10852996	+	.	chr12	74068863	+	.	-	.	.	.	fusion407
408	chr10	12472385	-	chr12	65867420	-	95		chr10	12430385	-	.	chr12	65473639	-	.	-	.	.	.	fusion408
409	chr10	12568035	+	chr12	69427658	+	29		chr10	12526036	+	.	chr12	69033878	+	.	-	.	.	.	fusion409
410	chr12	55381666	-	chr12	74266232	+	138	18884566	chr12	54987881	-	.	chr12	73872452	+	.	18884571	.	.	.	fusion410
[truncated: 176 more rows]
