# Supplementary material for: Optical mapping reveals a higher level of genomic architecture of chained fusions in cancer
Source: Genome Res. 2018 May;28(5):726–38. doi: 10.1101/gr.227975.117 (PMC5932612; doi:10.1101/gr.227975.117)
Supplement: Supplemental Material [file supp_gr.227975.117_Supplemental_Table_S2.xlsx]

## Sheet: matches
om_id	optical_map_shorter_by	gridss_breakpoints	spanned_regions	gap_size
QryContigID22251_row_9	-5872.1	gridss220_28279h gridss220_4803h gridss220_22075o gridss220_17049h gridss220_29055o gridss173_8282h gridss173_149o gridss266_3190o	7	265341
QryContigID22252_row_10	48.9	gridss219_25234h gridss219_1270o gridss219_11719h gridss219_26957o gridss221_2083o gridss173_11114h gridss173_149o gridss266_3190o	7	281460
QryContigID22721_row_11	-4926.8	gridss259_4823o gridss219_19066h gridss219_1270o gridss220_25331h gridss220_9687o	4	138798
QryContigID22721_row_12	73890.7	gridss258_4095h gridss184_13012h gridss184_2296o gridss218_3389h gridss218_7293o gridss220_18939h gridss97_6053h gridss96_4476h gridss96_251o gridss219_19487o	9	244841
QryContigID22721_row_14	-905.2	gridss18_41243o gridss185_2758h gridss185_15015o gridss74_4046h gridss18_43179h	4	599419
QryContigID22721_row_15	-869.7	gridss18_81039o gridss220_5598h gridss220_22949o gridss18_35806h gridss18_78916o	4	307234
QryContigID22721_row_16	-39.6	gridss184_8867o gridss18_11536h gridss18_58615o gridss18_37822h gridss18_81012o gridss172_4850o gridss173_5862o	6	50112.6
QryContigID22951_row_23	4214.8	gridss19_10951o gridss98_2286o gridss18_35685h gridss17_13527h gridss17_39770o gridss73_706o gridss18_28597h	6	401875
QryContigID22951_row_24	-71.8	gridss18_51145o gridss221_5546h gridss18_27845h gridss18_50296o gridss98_11279h	4	220167
QryContigID23121_row_28	7091.2	gridss124_6636h gridss98_7890h gridss98_2286o gridss18_35685h gridss18_58591o gridss218_4149h gridss218_6088o	6	754180
QryContigID23121_row_29	37140.2	gridss220_12605h gridss218_7293h gridss218_797o gridss218_6088o gridss221_11431o gridss172_1541h	5	253073
QryContigID23121_row_30	9602.4	gridss18_30421h gridss18_52430o gridss173_12316o gridss94_8147h gridss18_7599h	4	383623
QryContigID23121_row_31	-9577.3	gridss18_52430o gridss173_12316o gridss219_1790h gridss219_19632o gridss18_75239h gridss18_8333o	5	736280
QryContigID23121_row_32	-3401.4	gridss98_6252h gridss98_8277o gridss219_6401h gridss18_83960h gridss18_43179o gridss17_27473h	5	710807
QryContigID23121_row_33	809.1	gridss17_23359o gridss73_9036h gridss73_1196o gridss234_4198h gridss220_25228h gridss220_9543o	5	144710
QryContigID23121_row_34	62515.8	gridss185_10764h gridss18_19931h gridss18_61317o gridss173_3147h gridss173_11130o gridss18_19866h	5	476514
QryContigID23121_row_35	-886.2	gridss18_82840o gridss220_5598o gridss18_81039h gridss18_14771o gridss71_2988h gridss71_7870o	5	580778
QryContigID23121_row_36	3220.2	gridss18_60921h gridss18_41242o gridss72_3157h gridss72_12435o gridss94_8117o	4	380129
QryContigID23281_row_43	2590.7	gridss18_36065h gridss18_58615o gridss220_25023o gridss220_5598h gridss220_29055o gridss184_11053h gridss37_5007h gridss37_3355o	7	167434
QryContigID23601_row_45	36578.9	gridss185_3351h gridss98_6252h gridss98_9569o gridss221_11036o gridss221_1012o gridss221_8929o	5	463061
QryContigID23601_row_46	-637.1	gridss220_26843h gridss220_12605o gridss220_22075h gridss220_4803o gridss219_27377h gridss219_12697o gridss184_13801h	6	335983
QryContigID23602_row_49	-242.4	gridss17_45314h gridss17_7432o gridss17_45314o gridss219_1270o gridss219_11719h gridss219_19838o	5	408399
QryContigID24061_row_54	-16045.1	gridss173_8515o gridss18_35239h gridss18_78149o gridss222_2229o gridss18_33341h gridss18_55628o gridss221_7001h	6	639911
QryContigID24061_row_55	-5043	gridss72_16553h gridss72_3157o gridss18_41243h gridss18_81039o gridss312_1219o	4	654405
QryContigID24061_row_56	44103.8	gridss312_1489o gridss219_19487h gridss96_251h gridss96_4476o gridss97_6053o gridss220_18939o gridss218_7293h gridss218_3389o gridss184_2296h gridss184_13012o gridss258_4095o	10	250709
QryContigID24061_row_57	3790.4	gridss220_9687h gridss220_19340o gridss219_14427h gridss219_21699o gridss259_4823h gridss259_4769h	5	461387
QryContigID24061_row_58	12448.7	gridss258_1736h gridss74_7020h gridss19_5639h gridss19_10854o gridss219_18936h gridss218_985h gridss218_5707o gridss18_44470h	7	890704
QryContigID24062_row_59	-45212.5	gridss173_8515o gridss18_35685h gridss18_79392o gridss259_2804o gridss221_7001h	4	884894
QryContigID24062_row_63	289	gridss258_1736h gridss74_7020h gridss19_5639h gridss19_10854o gridss184_2296h gridss184_13012o gridss258_4091o gridss18_44470h	7	698451
QryContigID24581_row_64	12442	gridss72_13206o gridss233_1335h gridss219_30029h gridss219_4758h gridss18_41242h gridss18_58615o gridss220_18383o	6	1135503
QryContigID24581_row_65	22.8	gridss219_28646o gridss235_2059o gridss219_1790h gridss219_19632o gridss221_11909o	4	1.13419e+06
QryContigID24581_row_66	323.7	gridss173_10177h gridss173_6917o gridss218_797h gridss218_5707o gridss259_21980o gridss259_12199o	5	759701
QryContigID24581_row_67	-8202	gridss219_18750h gridss219_8413o gridss185_9223h gridss97_1559h gridss97_6199o gridss259_21690h gridss18_54987h	6	270769
QryContigID24582_row_69	-4201.5	gridss219_22214o gridss221_11049h gridss218_6088h gridss218_4149o gridss222_2229o	4	997592
QryContigID24582_row_70	518.1	gridss18_78149h gridss18_11332o gridss18_62357o gridss185_9917o gridss219_26957o	4	286825
QryContigID24822_row_74	37090.8	gridss173_7494o gridss220_5948o gridss219_14635h gridss219_22214o	3	160704
QryContigID24981_row_75	2007.9	gridss220_14186h gridss184_17056h gridss184_2296o gridss71_7870h gridss71_2988o gridss184_7748o gridss219_21685h	6	532768
QryContigID24981_row_76	-6799.3	gridss184_2296h gridss184_12854o gridss173_4089h	2	223074
QryContigID26480_row_84	21018.1	gridss73_6063o	0	-6642.1
QryContigID26881_row_88	-23563.5	gridss137_1864o	0	49974.5
QryContigID28131_row_93	4081.4	gridss17_45314h gridss17_23717o gridss96_283h gridss96_4476o gridss97_6053o gridss18_31433h	5	558379
QryContigID28131_row_94	-7675.6	gridss18_74977o gridss74_6264o gridss184_1494h gridss184_12244o gridss18_27845h gridss18_72345o gridss73_706h gridss17_38089h gridss17_260o	8	503549
QryContigID28131_row_95	27235.3	gridss234_2568h gridss221_6636h gridss221_12470o gridss222_2229o gridss74_16291h gridss74_6456o gridss233_3849h	6	286556
QryContigID28901_row_99	-578.6	gridss18_5161h gridss18_72345o	1	25136.6
QryContigID28902_row_100	-16467	gridss220_22949h gridss220_16979o gridss221_193o gridss222_13418h gridss219_22214h gridss219_15057o	5	45032
QryContigID28910_row_102	-4583.4	gridss18_8333h gridss18_75857o gridss18_52039h	2	31729.4
QryContigID28910_row_103	-17853.1	gridss18_7523o gridss172_7864o	1	19502.1
QryContigID28991_row_104	-552.9	gridss18_37822o gridss220_1831o gridss173_3103h gridss173_8275o gridss258_4091o gridss17_43904h	5	147699
QryContigID28991_row_105	-42099.4	gridss17_20592o gridss18_1607o gridss221_11049h gridss17_26722h gridss17_11504o	4	120723
QryContigID28991_row_106	75527.4	gridss259_7024o gridss222_10038h gridss18_51145h gridss18_26715o gridss18_39324o gridss18_527h gridss18_67700o gridss73_9470h	7	124681
QryContigID28991_row_108	-3472	gridss74_6104o gridss71_579h gridss71_7870o	2	167117
QryContigID28991_row_109	-6112.3	gridss219_14635o	0	6309.3
QryContigID29021_row_115	3992.4	gridss184_12334h gridss184_2038o	1	159741
QryContigID29021_row_116	18566.8	gridss220_9047h gridss220_18939o gridss218_7293h gridss218_945o gridss185_13998h gridss185_6011o	5	274071
QryContigID29021_row_117	-22487.8	gridss73_8729h gridss73_706o gridss18_72345h gridss18_28597o gridss73_706h gridss17_38089h gridss17_260o gridss234_5384o gridss301_1403h	8	394689
QryContigID29021_row_118	-52706.8	gridss220_28757h gridss18_52039h gridss18_28597o gridss73_706h gridss17_39770h gridss17_1887o gridss18_67700h	6	302228
QryContigID29021_row_119	-9480.5	gridss18_21590o	0	23812.5
QryContigID29021_row_120	34970.4	gridss173_6917o gridss18_50772h gridss18_7523o	2	341005
QryContigID29021_row_121	-4894	gridss172_5866o gridss219_27954h gridss184_2296h gridss184_16972o gridss220_1580h	4	658895
QryContigID29121_row_129	2097.6	gridss17_45758o gridss17_23359o gridss185_9398h gridss185_1443o gridss259_12199h	4	674955
QryContigID29121_row_130	2306.1	gridss219_25234h gridss219_1270o gridss220_20066o gridss220_16979h gridss220_22949o gridss18_78149h	5	193020
QryContigID29121_row_131	-9979.2	gridss18_11332o gridss18_83960o gridss219_6401o gridss219_1270h gridss219_19031o gridss17_18524h	5	164172
QryContigID29181_row_135	-496.8	gridss18_60792h	0	18352.8
QryContigID29181_row_136	-674.1	gridss18_43592o gridss220_10449o	1	14373.1
QryContigID29220_row_138	-26942.7	gridss17_39073h gridss17_13272o	1	111641
QryContigID29701_row_139	-6103.1	gridss185_9917h gridss18_62357h	1	26595.1
QryContigID30610_row_146	10797.6	gridss73_9470o gridss220_24577o gridss221_1774h gridss18_27845h gridss18_51145o gridss222_10038o	5	395754
QryContigID31400_row_149	1340.2	gridss19_10854h gridss19_5639o gridss74_7020o gridss258_233o gridss173_11114h gridss173_148o gridss74_8013h gridss74_13078o gridss18_81012h	8	307130
QryContigID31430_row_150	-564.7	gridss18_11420o gridss219_25826o gridss18_47402h	2	16773.7
QryContigID31441_row_152	18444.4	gridss18_86177o gridss220_18317h gridss98_2286h gridss98_11257o gridss17_26722h gridss17_11504o	5	301684
QryContigID31441_row_153	-4448	gridss219_1792h gridss219_25826o gridss18_11536h gridss17_13527h gridss17_39770o gridss17_30352h	5	107104
QryContigID31661_row_156	-44881.8	gridss184_7730h gridss184_12854o gridss219_22214o gridss222_13418o gridss221_193h gridss220_16979h gridss220_22949o gridss74_16291h gridss74_6456o	8	132470
QryContigID31661_row_157	22990.9	gridss233_3849h gridss173_135h gridss173_11114o gridss18_60244h gridss18_13696o gridss219_19838o	5	431627
QryContigID31661_row_158	1001.1	gridss302_3122o gridss218_8008h gridss184_13011h gridss184_7981o gridss218_797h gridss218_7293o gridss220_18939h	6	169097
QryContigID31661_row_159	216.9	gridss220_9047o gridss221_8765h gridss221_1012o gridss221_11431o gridss220_19340h gridss220_1831o gridss220_9389h	6	179234
QryContigID31661_row_160	718.9	gridss18_37822h gridss18_58700o gridss184_12244o gridss221_11736o	3	179234
QryContigID31661_row_161	16447.4	gridss219_19838h gridss18_13696h gridss18_60244o gridss173_11114h gridss173_135o gridss233_3849o	5	345339
QryContigID31661_row_162	6585.9	gridss74_6456h gridss74_16291o gridss219_22502h gridss18_5161h gridss18_51145o gridss18_68929h gridss18_1815o	6	603810
QryContigID31721_row_169	-817.1	gridss71_7870h gridss71_2988o gridss18_63703h gridss18_43179o gridss17_27473h gridss17_12560o gridss234_2422o gridss234_1015o	7	818330
QryContigID31721_row_170	780.6	gridss234_2514h gridss185_14410h gridss18_19931h gridss18_83960o gridss18_10847h gridss18_78708o gridss219_21217h gridss18_17770h	7	392357
QryContigID31721_row_171	-493.2	gridss18_60244o gridss173_11114h gridss173_3103o gridss18_58615h gridss18_11526o gridss18_62357o gridss98_4491h	6	344586
QryContigID32710_row_175	-113.9	gridss173_11439h gridss173_4089o gridss219_3566o gridss219_14351h	3	188720
QryContigID521_row_1	3522.1	gridss184_1494h gridss184_12244o gridss221_11736o gridss221_1774h gridss221_11918o gridss233_446h	5	222736
QryContigID57142_row_177	-3046.3	gridss310_205o gridss173_5862h gridss172_4850h gridss172_8181o gridss221_2083h gridss219_26957h gridss219_12579o gridss220_23031h gridss220_5948o	8	409361
QryContigID57142_row_179	-25683.8	gridss221_8929o gridss220_26843h gridss220_12605o gridss221_1012o gridss221_11431o gridss172_1541h	5	225547
QryContigID58662_row_180	414.7	gridss219_22502o gridss18_78149h gridss18_11536o gridss220_16979h gridss220_22949o	4	426654

## Sheet: optical_mapping_breakpoints
chrom1	start1	end1	chrom2	start2	end2	name	score	strand1	strand2
chr12	75657730	75657731	chr13	66136623	66136624	QryContigID521_row_1_be1	0	+	+
chr16	74406324	74406325	chr16	70142018	70142019	QryContigID1471_row_3_be1	0	-	-
chr3	60360804	60360805	chr3	60577380	60577381	QryContigID2691_row_5_be1	0	+	-
chr3	60413466	60413467	chr3	60527652	60527653	QryContigID2692_row_6_be1	0	+	-
chr3	116560353	116560354	chr3	116735539	116735540	QryContigID16790_row_7_be1	0	+	-
chr17	29436323	29436324	chr17	29713891	29713892	QryContigID19400_row_8_be1	0	-	-
chr15	98962844	98962845	chr16	62768973	62768974	QryContigID22251_row_9_be1	0	-	-
chr15	98962844	98962845	chr16	62768973	62768974	QryContigID22252_row_10_be1	0	-	-
chr15	91424543	91424544	chr15	92413316	92413317	QryContigID22721_row_11_be1	0	+	-
chr15	92562619	92562620	chr21	43111591	43111592	QryContigID22721_row_12_be1	0	+	+
chr21	42913650	42913651	chr1	188157659	188157660	QryContigID22721_row_13_be1	0	-	-
chr1	188910066	188910067	chr1	188910066	188910067	QryContigID22721_row_14_be1	0	+	+
chr1	188702703	188702704	chr10	8474326	8474327	QryContigID22721_row_15_be1	0	-	-
chr10	8765618	8765619	chr21	28233052	28233053	QryContigID22721_row_16_be1	0	+	-
chr1	194798910	194798911	chr1	186019599	186019600	QryContigID22951_row_23_be1	0	-	+
chr1	185846127	185846128	chr5	41929824	41929825	QryContigID22951_row_24_be1	0	-	-
chr20	41229879	41229880	chr17	43713584	43713585	QryContigID23000_row_27_be1	0	-	-
chr12	92864301	92864302	chr12	84115032	84115033	QryContigID23121_row_28_be1	0	-	+
chr12	83974997	83974998	chr9	79477454	79477455	QryContigID23121_row_29_be1	0	-	+
chr9	79366893	79366894	chr1	186251691	186251692	QryContigID23121_row_30_be1	0	-	+
chr1	185999012	185999013	chr10	10962394	10962395	QryContigID23121_row_31_be1	0	-	+
chr10	10509507	10509508	chr1	171693067	171693068	QryContigID23121_row_32_be1	0	-	-
chr1	172757459	172757460	chr20	409401	409402	QryContigID23121_row_33_be1	0	+	-
chr20	586375	586376	chr1	189109128	189109129	QryContigID23121_row_34_be1	0	+	+
chr1	188694373	188694374	chr12	69122892	69122893	QryContigID23121_row_35_be1	0	-	-
chr12	69432320	69432321	chr6	46850520	46850521	QryContigID23121_row_36_be1	0	+	+
chr4	28169884	28169885	chr10	3268132	3268133	QryContigID23281_row_43_be1	0	-	-
chr20	14410348	14410349	chr15	92399675	92399676	QryContigID23601_row_45_be1	0	-	+
chr15	92307350	92307351	chr10	8757293	8757294	QryContigID23601_row_46_be1	0	-	-
chr10	8908589	8908590	chr12	71236712	71236713	QryContigID23601_row_47_be1	0	+	+
chr12	71044856	71044857	chr10	9442426	9442427	QryContigID23601_row_48_be1	0	-	-
chr12	65894542	65894543	chr20	14558753	14558754	QryContigID23602_row_49_be1	0	-	+
chr9	82584131	82584132	chr12	84743781	84743782	QryContigID24061_row_54_be1	0	-	+
chr12	84466613	84466614	chr21	42939824	42939825	QryContigID24061_row_55_be1	0	-	-
chr21	43111591	43111592	chr15	92562619	92562620	QryContigID24061_row_56_be1	0	+	+
chr15	92406965	92406966	chr15	91424543	91424544	QryContigID24061_row_57_be1	0	-	+
chr15	91252563	91252564	chr1	189063455	189063456	QryContigID24061_row_58_be1	0	-	+
chr9	82584131	82584132	chr12	84743781	84743782	QryContigID24062_row_59_be1	0	-	+
chr15	91252563	91252564	chr1	189063455	189063456	QryContigID24062_row_63_be1	0	-	+
chr4	9214495	9214496	chr12	70334753	70334754	QryContigID24581_row_64_be1	0	-	+
chr12	69538984	69538985	chr12	84266395	84266396	QryContigID24581_row_65_be1	0	-	-
chr12	84370706	84370707	chr15	99177979	99177980	QryContigID24581_row_66_be1	0	+	-
chr15	99904983	99904984	chr1	186370477	186370478	QryContigID24581_row_67_be1	0	+	-
chr12	69538984	69538985	chr12	95602673	95602674	QryContigID24582_row_69_be1	0	-	+
chr12	95446553	95446554	chr12	84266395	84266396	QryContigID24582_row_70_be1	0	-	-
chr12	47666886	47666887	chr12	41838789	41838790	QryContigID24690_row_73_be1	0	-	+
chr9	87230804	87230805	chr12	93150237	93150238	QryContigID24822_row_74_be1	0	+	+
chr12	95339925	95339926	chr12	69380292	69380293	QryContigID24981_row_75_be1	0	-	-
chr12	69478909	69478910	chr9	82707606	82707607	QryContigID24981_row_76_be1	0	+	+
chr12	69913051	69913052	chr7	49193252	49193253	QryContigID25451_row_79_be1	0	+	+
chr15	24507718	24507719	chr15	24673818	24673819	QryContigID25871_row_81_be1	0	+	-
chr7	38412952	38412953	chr7	54390324	54390325	QryContigID26301_row_83_be1	0	+	+
chr4	12713127	12713128	chr4	23825682	23825683	QryContigID26480_row_84_be1	0	+	-
chr7	78331987	78331988	chr7	78152540	78152541	QryContigID26571_row_85_be1	0	-	+
chr7	40740487	40740488	chr7	62979594	62979595	QryContigID26881_row_87_be1	0	-	-
chr7	63096769	63096770	chr7	100316109	100316110	QryContigID26881_row_88_be1	0	+	-
chr7	100546987	100546988	chr7	58003408	58003409	QryContigID26881_row_89_be1	0	+	+
chr12	65874066	65874067	chr1	186407713	186407714	QryContigID28131_row_93_be1	0	-	+
chr1	186285010	186285011	chr13	74923149	74923150	QryContigID28131_row_94_be1	0	-	+
chr13	74740974	74740975	chr13	69395314	69395315	QryContigID28131_row_95_be1	0	-	-
chr12	69776317	69776318	chr4	28602227	28602228	QryContigID28901_row_99_be1	0	+	-
chr12	95602673	95602674	chr12	69538984	69538985	QryContigID28902_row_100_be1	0	+	-
chr10	10962394	10962395	chr1	185999012	185999013	QryContigID28910_row_102_be1	0	+	-
chr1	186251691	186251692	chr9	79366893	79366894	QryContigID28910_row_103_be1	0	+	-
chr1	188741162	188741163	chr1	172372717	172372718	QryContigID28991_row_104_be1	0	+	-
chr1	172527319	172527320	chr15	92514778	92514779	QryContigID28991_row_105_be1	0	+	-
chr15	92731115	92731116	chr4	12572671	12572672	QryContigID28991_row_106_be1	0	+	-
chr4	23980087	23980088	chr12	69161319	69161320	QryContigID28991_row_108_be1	0	+	-
chr12	69448219	69448220	chr12	93027644	93027645	QryContigID28991_row_109_be1	0	+	-
chr10	8390876	8390877	chr13	89444825	89444826	QryContigID29021_row_115_be1	0	+	+
chr13	89324870	89324871	chr12	78870674	78870675	QryContigID29021_row_116_be1	0	-	-
chr12	78990629	78990630	chr20	1453564	1453565	QryContigID29021_row_117_be1	0	+	+
chr20	1308573	1308574	chr1	181834787	181834788	QryContigID29021_row_118_be1	0	-	-
chr1	181929675	181929676	chr9	86806287	86806288	QryContigID29021_row_119_be1	0	+	-
chr9	86956388	86956389	chr9	79340885	79340886	QryContigID29021_row_120_be1	0	+	+
chr9	79193906	79193907	chr12	70876056	70876057	QryContigID29021_row_121_be1	0	-	+
chr1	172587765	172587766	chr15	99116584	99116585	QryContigID29121_row_129_be1	0	-	+
chr15	98973368	98973369	chr1	188283916	188283917	QryContigID29121_row_130_be1	0	-	-
chr1	188368448	188368449	chr1	172391994	172391995	QryContigID29121_row_131_be1	0	+	+
chr5	41819456	41819457	chr1	188694373	188694374	QryContigID29181_row_135_be1	0	+	-
chr1	188935393	188935394	chr15	85327739	85327740	QryContigID29181_row_136_be1	0	+	-
chr10	7946150	7946151	chr1	171693067	171693068	QryContigID29220_row_138_be1	0	-	-
chr12	69326368	69326369	chr1	188811899	188811900	QryContigID29701_row_139_be1	0	+	-
chr16	14906943	14906944	chr16	15446095	15446096	QryContigID30411_row_140_be1	0	+	+
chr16	14975839	14975840	chr16	14996832	14996833	QryContigID30411_row_141_be1	0	-	+
chr16	14871760	14871761	chr16	15409606	15409607	QryContigID30411_row_142_be1	0	-	-
chr4	12572671	12572672	chr15	92731115	92731116	QryContigID30610_row_146_be1	0	-	+
chr20	15523565	15523566	chr20	15256065	15256066	QryContigID31361_row_147_be1	0	-	+
chr20	15523565	15523566	chr20	15256065	15256066	QryContigID31362_row_148_be1	0	-	+
chr12	69122892	69122893	chr1	188694373	188694374	QryContigID31400_row_149_be1	0	-	-
chr1	188368448	188368449	chr1	181834787	181834788	QryContigID31430_row_150_be1	0	+	-
chr1	188900824	188900825	chr15	92575100	92575101	QryContigID31441_row_152_be1	0	-	-
chr15	93423253	93423254	chr1	172221522	172221523	QryContigID31441_row_153_be1	0	+	-
chr12	95499152	95499153	chr15	98819172	98819173	QryContigID31661_row_156_be1	0	-	-
chr15	98902087	98902088	chr20	14617973	14617974	QryContigID31661_row_157_be1	0	+	+
chr20	14446665	14446666	chr12	70765743	70765744	QryContigID31661_row_158_be1	0	-	-
chr12	70945460	70945461	chr12	70945460	70945461	QryContigID31661_row_159_be1	0	+	+
chr12	70765743	70765744	chr20	14446665	14446666	QryContigID31661_row_160_be1	0	-	-
chr20	14617973	14617974	chr15	98902087	98902088	QryContigID31661_row_161_be1	0	+	+
chr15	98819172	98819173	chr15	101174169	101174170	QryContigID31661_row_162_be1	0	-	+
chr12	69107676	69107677	chr15	85465659	85465660	QryContigID31721_row_169_be1	0	-	+
chr15	85327739	85327740	chr1	188935393	188935394	QryContigID31721_row_170_be1	0	-	+
chr1	188694373	188694374	chr5	41819456	41819457	QryContigID31721_row_171_be1	0	-	+
chr12	93027644	93027645	chr12	69448219	69448220	QryContigID32710_row_175_be1	0	-	+
chr21	27634435	27634436	chr12	93107374	93107375	QryContigID57142_row_177_be1	0	+	+
chr12	83974997	83974998	chr9	79477454	79477455	QryContigID57142_row_179_be1	0	-	+
chr12	69538984	69538985	chr12	95602673	95602674	QryContigID58662_row_180_be1	0	-	+
chr13	66136623	66136624	chr12	75657730	75657731	QryContigID521_row_1_be2	0	+	+
chr16	70142018	70142019	chr16	74406324	74406325	QryContigID1471_row_3_be2	0	-	-
chr3	60577380	60577381	chr3	60360804	60360805	QryContigID2691_row_5_be2	0	-	+
chr3	60527652	60527653	chr3	60413466	60413467	QryContigID2692_row_6_be2	0	-	+
chr3	116735539	116735540	chr3	116560353	116560354	QryContigID16790_row_7_be2	0	-	+
chr17	29713891	29713892	chr17	29436323	29436324	QryContigID19400_row_8_be2	0	-	-
chr16	62768973	62768974	chr15	98962844	98962845	QryContigID22251_row_9_be2	0	-	-
chr16	62768973	62768974	chr15	98962844	98962845	QryContigID22252_row_10_be2	0	-	-
chr15	92413316	92413317	chr15	91424543	91424544	QryContigID22721_row_11_be2	0	-	+
chr21	43111591	43111592	chr15	92562619	92562620	QryContigID22721_row_12_be2	0	+	+
chr1	188157659	188157660	chr21	42913650	42913651	QryContigID22721_row_13_be2	0	-	-
chr1	188910066	188910067	chr1	188910066	188910067	QryContigID22721_row_14_be2	0	+	+
chr10	8474326	8474327	chr1	188702703	188702704	QryContigID22721_row_15_be2	0	-	-
chr21	28233052	28233053	chr10	8765618	8765619	QryContigID22721_row_16_be2	0	-	+
chr1	186019599	186019600	chr1	194798910	194798911	QryContigID22951_row_23_be2	0	+	-
chr5	41929824	41929825	chr1	185846127	185846128	QryContigID22951_row_24_be2	0	-	-
chr17	43713584	43713585	chr20	41229879	41229880	QryContigID23000_row_27_be2	0	-	-
chr12	84115032	84115033	chr12	92864301	92864302	QryContigID23121_row_28_be2	0	+	-
chr9	79477454	79477455	chr12	83974997	83974998	QryContigID23121_row_29_be2	0	+	-
chr1	186251691	186251692	chr9	79366893	79366894	QryContigID23121_row_30_be2	0	+	-
chr10	10962394	10962395	chr1	185999012	185999013	QryContigID23121_row_31_be2	0	+	-
chr1	171693067	171693068	chr10	10509507	10509508	QryContigID23121_row_32_be2	0	-	-
chr20	409401	409402	chr1	172757459	172757460	QryContigID23121_row_33_be2	0	-	+
chr1	189109128	189109129	chr20	586375	586376	QryContigID23121_row_34_be2	0	+	+
chr12	69122892	69122893	chr1	188694373	188694374	QryContigID23121_row_35_be2	0	-	-
chr6	46850520	46850521	chr12	69432320	69432321	QryContigID23121_row_36_be2	0	+	+
chr10	3268132	3268133	chr4	28169884	28169885	QryContigID23281_row_43_be2	0	-	-
chr15	92399675	92399676	chr20	14410348	14410349	QryContigID23601_row_45_be2	0	+	-
chr10	8757293	8757294	chr15	92307350	92307351	QryContigID23601_row_46_be2	0	-	-
chr12	71236712	71236713	chr10	8908589	8908590	QryContigID23601_row_47_be2	0	+	+
chr10	9442426	9442427	chr12	71044856	71044857	QryContigID23601_row_48_be2	0	-	-
chr20	14558753	14558754	chr12	65894542	65894543	QryContigID23602_row_49_be2	0	+	-
chr12	84743781	84743782	chr9	82584131	82584132	QryContigID24061_row_54_be2	0	+	-
chr21	42939824	42939825	chr12	84466613	84466614	QryContigID24061_row_55_be2	0	-	-
chr15	92562619	92562620	chr21	43111591	43111592	QryContigID24061_row_56_be2	0	+	+
chr15	91424543	91424544	chr15	92406965	92406966	QryContigID24061_row_57_be2	0	+	-
chr1	189063455	189063456	chr15	91252563	91252564	QryContigID24061_row_58_be2	0	+	-
chr12	84743781	84743782	chr9	82584131	82584132	QryContigID24062_row_59_be2	0	+	-
chr1	189063455	189063456	chr15	91252563	91252564	QryContigID24062_row_63_be2	0	+	-
chr12	70334753	70334754	chr4	9214495	9214496	QryContigID24581_row_64_be2	0	+	-
chr12	84266395	84266396	chr12	69538984	69538985	QryContigID24581_row_65_be2	0	-	-
chr15	99177979	99177980	chr12	84370706	84370707	QryContigID24581_row_66_be2	0	-	+
chr1	186370477	186370478	chr15	99904983	99904984	QryContigID24581_row_67_be2	0	-	+
chr12	95602673	95602674	chr12	69538984	69538985	QryContigID24582_row_69_be2	0	+	-
chr12	84266395	84266396	chr12	95446553	95446554	QryContigID24582_row_70_be2	0	-	-
chr12	41838789	41838790	chr12	47666886	47666887	QryContigID24690_row_73_be2	0	+	-
chr12	93150237	93150238	chr9	87230804	87230805	QryContigID24822_row_74_be2	0	+	+
chr12	69380292	69380293	chr12	95339925	95339926	QryContigID24981_row_75_be2	0	-	-
chr9	82707606	82707607	chr12	69478909	69478910	QryContigID24981_row_76_be2	0	+	+
chr7	49193252	49193253	chr12	69913051	69913052	QryContigID25451_row_79_be2	0	+	+
chr15	24673818	24673819	chr15	24507718	24507719	QryContigID25871_row_81_be2	0	-	+
chr7	54390324	54390325	chr7	38412952	38412953	QryContigID26301_row_83_be2	0	+	+
chr4	23825682	23825683	chr4	12713127	12713128	QryContigID26480_row_84_be2	0	-	+
chr7	78152540	78152541	chr7	78331987	78331988	QryContigID26571_row_85_be2	0	+	-
chr7	62979594	62979595	chr7	40740487	40740488	QryContigID26881_row_87_be2	0	-	-
chr7	100316109	100316110	chr7	63096769	63096770	QryContigID26881_row_88_be2	0	-	+
chr7	58003408	58003409	chr7	100546987	100546988	QryContigID26881_row_89_be2	0	+	+
chr1	186407713	186407714	chr12	65874066	65874067	QryContigID28131_row_93_be2	0	+	-
chr13	74923149	74923150	chr1	186285010	186285011	QryContigID28131_row_94_be2	0	+	-
chr13	69395314	69395315	chr13	74740974	74740975	QryContigID28131_row_95_be2	0	-	-
chr4	28602227	28602228	chr12	69776317	69776318	QryContigID28901_row_99_be2	0	-	+
chr12	69538984	69538985	chr12	95602673	95602674	QryContigID28902_row_100_be2	0	-	+
chr1	185999012	185999013	chr10	10962394	10962395	QryContigID28910_row_102_be2	0	-	+
chr9	79366893	79366894	chr1	186251691	186251692	QryContigID28910_row_103_be2	0	-	+
chr1	172372717	172372718	chr1	188741162	188741163	QryContigID28991_row_104_be2	0	-	+
chr15	92514778	92514779	chr1	172527319	172527320	QryContigID28991_row_105_be2	0	-	+
chr4	12572671	12572672	chr15	92731115	92731116	QryContigID28991_row_106_be2	0	-	+
chr12	69161319	69161320	chr4	23980087	23980088	QryContigID28991_row_108_be2	0	-	+
chr12	93027644	93027645	chr12	69448219	69448220	QryContigID28991_row_109_be2	0	-	+
chr13	89444825	89444826	chr10	8390876	8390877	QryContigID29021_row_115_be2	0	+	+
chr12	78870674	78870675	chr13	89324870	89324871	QryContigID29021_row_116_be2	0	-	-
chr20	1453564	1453565	chr12	78990629	78990630	QryContigID29021_row_117_be2	0	+	+
chr1	181834787	181834788	chr20	1308573	1308574	QryContigID29021_row_118_be2	0	-	-
chr9	86806287	86806288	chr1	181929675	181929676	QryContigID29021_row_119_be2	0	-	+
chr9	79340885	79340886	chr9	86956388	86956389	QryContigID29021_row_120_be2	0	+	+
chr12	70876056	70876057	chr9	79193906	79193907	QryContigID29021_row_121_be2	0	+	-
chr15	99116584	99116585	chr1	172587765	172587766	QryContigID29121_row_129_be2	0	+	-
chr1	188283916	188283917	chr15	98973368	98973369	QryContigID29121_row_130_be2	0	-	-
chr1	172391994	172391995	chr1	188368448	188368449	QryContigID29121_row_131_be2	0	+	+
chr1	188694373	188694374	chr5	41819456	41819457	QryContigID29181_row_135_be2	0	-	+
chr15	85327739	85327740	chr1	188935393	188935394	QryContigID29181_row_136_be2	0	-	+
chr1	171693067	171693068	chr10	7946150	7946151	QryContigID29220_row_138_be2	0	-	-
chr1	188811899	188811900	chr12	69326368	69326369	QryContigID29701_row_139_be2	0	-	+
chr16	15446095	15446096	chr16	14906943	14906944	QryContigID30411_row_140_be2	0	+	+
chr16	14996832	14996833	chr16	14975839	14975840	QryContigID30411_row_141_be2	0	+	-
chr16	15409606	15409607	chr16	14871760	14871761	QryContigID30411_row_142_be2	0	-	-
chr15	92731115	92731116	chr4	12572671	12572672	QryContigID30610_row_146_be2	0	+	-
chr20	15256065	15256066	chr20	15523565	15523566	QryContigID31361_row_147_be2	0	+	-
chr20	15256065	15256066	chr20	15523565	15523566	QryContigID31362_row_148_be2	0	+	-
chr1	188694373	188694374	chr12	69122892	69122893	QryContigID31400_row_149_be2	0	-	-
chr1	181834787	181834788	chr1	188368448	188368449	QryContigID31430_row_150_be2	0	-	+
chr15	92575100	92575101	chr1	188900824	188900825	QryContigID31441_row_152_be2	0	-	-
chr1	172221522	172221523	chr15	93423253	93423254	QryContigID31441_row_153_be2	0	-	+
chr15	98819172	98819173	chr12	95499152	95499153	QryContigID31661_row_156_be2	0	-	-
chr20	14617973	14617974	chr15	98902087	98902088	QryContigID31661_row_157_be2	0	+	+
chr12	70765743	70765744	chr20	14446665	14446666	QryContigID31661_row_158_be2	0	-	-
chr12	70945460	70945461	chr12	70945460	70945461	QryContigID31661_row_159_be2	0	+	+
chr20	14446665	14446666	chr12	70765743	70765744	QryContigID31661_row_160_be2	0	-	-
chr15	98902087	98902088	chr20	14617973	14617974	QryContigID31661_row_161_be2	0	+	+
chr15	101174169	101174170	chr15	98819172	98819173	QryContigID31661_row_162_be2	0	+	-
chr15	85465659	85465660	chr12	69107676	69107677	QryContigID31721_row_169_be2	0	+	-
chr1	188935393	188935394	chr15	85327739	85327740	QryContigID31721_row_170_be2	0	+	-
chr5	41819456	41819457	chr1	188694373	188694374	QryContigID31721_row_171_be2	0	+	-
chr12	69448219	69448220	chr12	93027644	93027645	QryContigID32710_row_175_be2	0	+	-
chr12	93107374	93107375	chr21	27634435	27634436	QryContigID57142_row_177_be2	0	+	+
chr9	79477454	79477455	chr12	83974997	83974998	QryContigID57142_row_179_be2	0	+	-
chr12	95602673	95602674	chr12	69538984	69538985	QryContigID58662_row_180_be2	0	+	-

## Sheet: gridss_breakpoints
chrom1	start1	end1	chrom2	start2	end2	name	score	strand1	strand2
chr1	14437071	14437074	chr1	14438939	14438942	gridss1_4660o	961.82	+	-
chr1	14438939	14438942	chr1	14437071	14437074	gridss1_4660h	961.82	-	+
chr1	44059295	44059296	chr1	44059885	44059886	gridss4_1151o	692.7	+	+
chr1	44059885	44059886	chr1	44059295	44059296	gridss4_1151h	692.7	+	+
chr1	88972823	88972825	chr17	32064663	32064665	gridss8_2131o	525.82	+	+
chr1	104443198	104443199	chr1	104443725	104443726	gridss10_3730o	621.37	+	-
chr1	104443725	104443726	chr1	104443198	104443199	gridss10_3730h	621.37	-	+
chr1	145017407	145017408	chr1	145017441	145017442	gridss14_1732o	691.2	+	-
chr1	145017441	145017442	chr1	145017407	145017408	gridss14_1732h	691.2	-	+
chr1	170849712	170849720	chr4	11755139	11755147	gridss17_38089o	8437.82	-	-
chr1	170849971	170849972	chr1	170850000	170850001	gridss17_11263o	3732.9	+	-
chr1	170850000	170850001	chr1	170849971	170849972	gridss17_11263h	3732.9	-	+
chr1	170875611	170875614	chr13	74898741	74898744	gridss17_260o	3386.38	+	+
chr1	171045159	171045163	chr12	83591417	83591421	gridss17_26722o	25117.2	-	+
chr1	171049256	171049259	chr15	92568906	92568909	gridss17_11504o	13167.2	+	-
chr1	171110196	171110197	chr1	185377473	185377474	gridss17_11906o	2431.27	+	-
chr1	171110196	171110197	chr1	186262621	186262622	gridss17_634o	9950.88	+	+
chr1	171110196	171110197	chr1	188451759	188451760	gridss17_635o	6117.26	+	+
chr1	171174154	171174156	chr13	79486990	79486992	gridss17_27108o	10230.8	-	+
chr1	171221857	171221859	chr13	74732482	74732484	gridss17_12230o	8915.47	+	-
chr1	171411873	171411874	chr21	28593843	28593844	gridss17_27350o	3907.76	-	+
chr1	171432322	171432326	chr16	49779881	49779885	gridss17_12420o	7484.44	+	-
chr1	171613091	171613092	chr4	28511681	28511682	gridss17_27473o	6671.03	-	+
chr1	171613118	171613119	chr4	28511681	28511682	gridss17_27474o	786.98	-	+
chr1	171623933	171623936	chr13	74307815	74307818	gridss17_12560o	15771	+	-
chr1	171688220	171688222	chr10	7956818	7956820	gridss17_39073o	9028.47	-	-
chr1	171783586	171783587	chr1	171783649	171783650	gridss17_13272o	3432.72	+	-
chr1	171783649	171783650	chr1	171783586	171783587	gridss17_13272h	3432.72	-	+
chr1	171804824	171804825	chr4	11772960	11772961	gridss17_39770o	7097.96	-	-
chr1	171812026	171812033	chr1	188381902	188381909	gridss17_13527o	12525.8	+	-
chr1	171814471	171814473	chr12	66053071	66053073	gridss17_28274o	16070.4	-	+
chr1	171816885	171816888	chr12	70805368	70805371	gridss17_1887o	15901.6	+	+
chr1	171906007	171906008	chr11	124577512	124577513	gridss17_2321o	508.28	+	+
chr1	172215360	172215361	chr4	11782497	11782498	gridss17_30352o	12336.1	-	+
chr1	172372762	172372764	chr12	69345540	69345542	gridss17_43410o	13313.5	-	-
chr1	172392004	172392005	chr12	69081628	69081629	gridss17_18524o	13684.9	+	-
chr1	172415427	172415429	chr15	99304930	99304932	gridss17_43904o	1770.39	-	-
chr1	172536159	172536162	chr1	183836548	183836551	gridss17_20592o	13312.7	+	-
chr1	172540434	172540435	chr12	65892926	65892927	gridss17_45314o	5035.65	-	-
chr1	172559879	172559883	chr15	99498709	99498713	gridss17_7238o	13135.9	+	+
chr1	172566186	172566187	chr9	85961787	85961788	gridss17_33992o	8748.29	-	+
chr1	172586330	172586339	chr1	172586377	172586386	gridss17_7432o	1909.16	+	+
chr1	172586338	172586339	chr1	172592048	172592049	gridss17_21092o	10248.5	+	-
chr1	172586343	172586350	chr1	172592048	172592055	gridss17_45758o	2109.56	-	-
chr1	172586377	172586386	chr1	172586330	172586339	gridss17_7432h	1909.16	+	+
chr1	172592048	172592049	chr1	172586338	172586339	gridss17_21092h	10248.5	-	+
chr1	172592048	172592055	chr1	172586343	172586350	gridss17_45758h	2109.56	-	-
chr1	172778193	172778195	chr12	69191039	69191041	gridss17_23359o	7242.33	+	-
chr1	172830016	172830019	chr1	172833039	172833042	gridss17_23691o	532.43	+	-
chr1	172833039	172833042	chr1	172830016	172830019	gridss17_23691h	532.43	-	+
chr1	172833835	172833839	chr21	23868327	23868331	gridss17_23717o	6733.37	+	-
chr1	178249795	178249796	chr1	178298099	178298100	gridss17_37380o	10007.9	-	+
chr1	178264520	178264523	chr4	24167413	24167416	gridss17_49047o	5428.41	-	-
chr1	178297756	178297758	chr2	158670933	158670935	gridss17_10673o	14392.6	+	+
chr1	178297815	178297817	chr12	69287206	69287208	gridss17_37615o	12350.9	-	+
chr1	178298099	178298100	chr1	178249795	178249796	gridss17_37380h	10007.9	+	-
chr1	180835558	180835559	chr21	28703497	28703498	gridss18_47181o	2063.93	-	+
chr1	180835605	180835606	chr12	69082665	69082666	gridss18_165o	671.59	+	+
chr1	180835605	180835606	chr1	194786566	194786567	gridss18_20612o	1807.27	+	-
chr1	181834144	181834147	chr12	82462942	82462945	gridss18_47402o	9358.37	-	+
chr1	181839354	181839357	chr12	70799826	70799829	gridss18_67700o	15841.3	-	-
chr1	181849693	181849696	chr10	8469009	8469012	gridss18_527o	15938.7	+	+
chr1	181944007	181944009	chr9	86796890	86796892	gridss18_21590o	10156.7	+	-
chr1	182314291	182314292	chr1	182315461	182315462	gridss18_68265o	17389	-	-
chr1	182315461	182315462	chr1	182314291	182314292	gridss18_68265h	17389	-	-
chr1	182316080	182316084	chr1	182316272	182316276	gridss18_21750o	24277.5	+	-
chr1	182316272	182316276	chr1	182316080	182316084	gridss18_21750h	24277.5	-	+
chr1	182317203	182317205	chr12	78898630	78898632	gridss18_48049o	13498.6	-	+
chr1	182319058	182319066	chr12	95458689	95458697	gridss18_1122o	48878.6	+	+
chr1	183831423	183831427	chr5	41541611	41541615	gridss18_48381o	27506.3	-	+
chr1	183836548	183836551	chr1	172536159	172536162	gridss17_20592h	13312.7	-	+
chr1	183844657	183844661	chr12	93038992	93038996	gridss18_1607o	10339.5	+	+
chr1	183849799	183849800	chr12	92863947	92863948	gridss18_68929o	9672.49	-	-
chr1	183858525	183858530	chr15	101181272	101181277	gridss18_1815o	13907.9	+	+
chr1	183864028	183864034	chr5	1328573	1328579	gridss18_22907o	12519	+	-
chr1	184099639	184099641	chr10	5148803	5148805	gridss18_69203o	8496.31	-	-
chr1	184116277	184116279	chr12	75783739	75783741	gridss18_2026o	17329.8	+	+
chr1	185365773	185365774	chr3	192792804	192792805	gridss18_69519o	2473.39	-	-
chr1	185373095	185373106	chr1	185373434	185373445	gridss18_23515o	890.74	+	-
chr1	185373434	185373445	chr1	185373095	185373106	gridss18_23515h	890.74	-	+
chr1	185375966	185375971	chr1	185375998	185376003	gridss18_49285o	558.7	-	+
chr1	185375998	185376003	chr1	185375966	185375971	gridss18_49285h	558.7	+	-
chr1	185377473	185377474	chr1	171110196	171110197	gridss17_11906h	2431.27	-	+
chr1	185377502	185377506	chr1	188451756	188451760	gridss18_2284o	1785.94	+	+
chr1	185385384	185385386	chr1	188910212	188910214	gridss18_2295o	2077.71	+	+
chr1	185683349	185683352	chr12	75744261	75744264	gridss18_49356o	10805.6	-	+
chr1	185712882	185712885	chr5	1350094	1350097	gridss18_69726o	12083	-	-
chr1	185713619	185713621	chr21	28012100	28012102	gridss18_2500o	1618.11	+	+
chr1	185750225	185750230	chr21	27511192	27511197	gridss18_69739o	15087	-	-
chr1	185780257	185780260	chr6	114104605	114104608	gridss18_70083o	8346.44	-	-
chr1	185810621	185810626	chr12	84371096	84371101	gridss18_24704o	15193.7	+	-
chr1	185829017	185829021	chr21	27496138	27496142	gridss18_50296o	9754.45	-	+
chr1	185829025	185829026	chr1	185886858	185886859	gridss18_3323o	9168.44	+	+
chr1	185834739	185834740	chr1	185834767	185834768	gridss18_24987o	1717.39	+	-
chr1	185834767	185834768	chr1	185834739	185834740	gridss18_24987h	1717.39	-	+
chr1	185886858	185886859	chr1	185829025	185829026	gridss18_3323h	9168.44	+	+
chr1	185888078	185888080	chr12	58025180	58025182	gridss18_50772o	7844.87	-	+
chr1	185892403	185892406	chr4	9114088	9114091	gridss18_50801o	9081.74	-	+
chr1	185920964	185920966	chr12	92960519	92960521	gridss18_51145o	4905.71	-	+
chr1	185934190	185934193	chr5	1389471	1389474	gridss18_26340o	16103.3	+	-
chr1	185955491	185955494	chr1	188639981	188639984	gridss18_26715o	13461.7	+	-
chr1	185983782	185983783	chr4	28601489	28601490	gridss18_72345o	9525.38	-	-
chr1	185994484	185994485	chr12	78937296	78937297	gridss18_52039o	14017.8	-	+
chr1	186005871	186005872	chr12	69778786	69778787	gridss18_5161o	6208.28	+	+
chr1	186021844	186021849	chr9	86036540	86036545	gridss18_52430o	8270.08	-	+
chr1	186026285	186026291	chr21	28684502	28684508	gridss18_27714o	8593.37	+	-
chr1	186034382	186034383	chr12	84100100	84100101	gridss18_27845o	9705.56	+	-
chr1	186036578	186036580	chr12	84315166	84315168	gridss18_52621o	4152.26	-	+
chr1	186089192	186089194	chr4	28624908	28624910	gridss18_28597o	17521.3	+	-
chr1	186105882	186105886	chr12	84400392	84400396	gridss18_73762o	5523.5	-	-
chr1	186234201	186234202	chr4	24001873	24001874	gridss18_74977o	2785.01	-	-
chr1	186253303	186253304	chr9	79348914	79348915	gridss18_7523o	2591.5	+	+
chr1	186253309	186253310	chr9	79348939	79348940	gridss18_30421o	12992.1	+	-
chr1	186262619	186262622	chr1	188451630	188451633	gridss18_30489o	6581.84	+	-
chr1	186262621	186262622	chr1	171110196	171110197	gridss17_634h	9950.88	+	+
chr1	186264382	186264384	chr13	91251865	91251867	gridss18_75226o	14199.9	-	-
chr1	186267402	186267404	chr5	1341653	1341655	gridss18_7599o	13636.2	+	+
chr1	186280849	186280850	chr12	83938251	83938252	gridss18_75239o	5394.2	-	-
chr1	186363180	186363182	chr15	97147375	97147377	gridss18_54987o	13289.4	-	+
chr1	186398171	186398176	chr12	78928703	78928708	gridss18_75857o	10799.6	-	-
chr1	186409943	186409944	chr12	70524955	70524956	gridss18_31433o	9846.14	+	-
chr1	186412907	186412910	chr10	10966211	10966214	gridss18_8333o	5548.21	+	+
chr1	186469296	186469298	chr21	42120152	42120154	gridss18_55628o	3632.75	-	+
chr1	186555943	186555949	chr13	74562534	74562540	gridss18_9000o	2755.66	+	+
chr1	186597025	186597032	chr12	70575609	70575616	gridss18_56257o	11355.5	-	+
chr1	186639120	186639125	chr12	69428592	69428597	gridss18_33002o	8023.15	+	-
chr1	186666265	186666266	chr20	14532283	14532284	gridss18_33179o	9069.04	+	-
chr1	186673291	186673298	chr12	92924597	92924604	gridss18_56684o	13091.1	-	+
chr1	186705063	186705065	chr12	95464502	95464504	gridss18_33341o	9810.52	+	-
chr1	188016178	188016180	chr7	20743912	20743914	gridss18_57055o	10973.6	-	+
chr1	188054813	188054814	chr13	75358115	75358116	gridss18_33932o	9473.1	+	-
chr1	188191814	188191815	chr21	42917595	42917596	gridss18_78049o	1894.51	-	-
chr1	188272500	188272503	chr12	95446975	95446978	gridss18_78149o	27101.5	-	-
chr1	188314348	188314351	chr21	27787346	27787349	gridss18_78708o	12060.4	-	-
chr1	188320503	188320506	chr12	60549484	60549487	gridss18_10847o	10871.2	+	+
chr1	188328946	188328947	chr10	8476189	8476190	gridss18_78916o	3080.46	-	-
chr1	188340238	188340242	chr12	70655248	70655252	gridss18_35239o	2131.36	+	-
chr1	188346403	188346404	chr3	196700030	196700031	gridss18_35330o	3575.44	+	-
chr1	188360606	188360607	chr1	188915746	188915747	gridss18_11332o	1644.05	+	+
chr1	188369746	188369751	chr12	69091943	69091948	gridss18_11420o	19366.4	+	+
chr1	188377594	188377598	chr12	95463818	95463822	gridss18_58591o	19776.2	-	+
chr1	188379027	188379028	chr12	95463602	95463603	gridss18_79363o	14117.7	-	-
chr1	188379593	188379594	chr12	70876997	70876998	gridss18_58615o	10859.6	-	+
chr1	188380087	188380088	chr15	98970944	98970945	gridss18_79392o	11349	-	-
chr1	188381902	188381909	chr1	171812026	171812033	gridss17_13527h	12525.8	-	+
chr1	188381999	188382000	chr12	70296333	70296334	gridss18_35685o	10266	+	-
chr1	188382927	188382930	chr1	188843126	188843129	gridss18_11526o	10003.8	+	+
chr1	188383125	188383127	chr12	82575362	82575364	gridss18_11536o	7337.43	+	+
chr1	188383152	188383160	chr10	8023227	8023235	gridss18_58700o	14255.2	-	+
chr1	188386230	188386232	chr12	95449119	95449121	gridss18_35806o	35628.1	+	-
chr1	188409651	188409653	chr4	28181953	28181955	gridss18_36065o	7256.91	+	-
chr1	188444297	188444299	chr9	83505311	83505313	gridss18_11949o	8795.57	+	+
chr1	188451630	188451633	chr1	186262619	186262622	gridss18_30489h	6581.84	-	+
chr1	188451756	188451760	chr1	185377502	185377506	gridss18_2284h	1785.94	+	+
chr1	188451759	188451760	chr1	171110196	171110197	gridss17_635h	6117.26	+	+
chr1	188484376	188484377	chr10	3279096	3279097	gridss18_59151o	13561.5	-	+
chr1	188493813	188493830	chr1	188493849	188493866	gridss18_59201o	821.19	-	+
chr1	188493849	188493866	chr1	188493813	188493830	gridss18_59201h	821.19	+	-
chr1	188539051	188539052	chr12	83702504	83702505	gridss18_59426o	8884.48	-	+
chr1	188539453	188539456	chr1	188540229	188540232	gridss18_36671o	21967.2	+	-
chr1	188540229	188540232	chr1	188539453	188539456	gridss18_36671h	21967.2	-	+
chr1	188564428	188564429	chr1	188564584	188564585	gridss18_36970o	857.1	+	-
chr1	188564584	188564585	chr1	188564428	188564429	gridss18_36970h	857.1	-	+
chr1	188601417	188601419	chr13	89321263	89321265	gridss18_37423o	9755.08	+	-
chr1	188610757	188610761	chr4	8431004	8431008	gridss18_80733o	6382.21	-	-
chr1	188626392	188626395	chr12	84380520	84380523	gridss18_37679o	10994.6	+	-
chr1	188639981	188639984	chr1	185955491	185955494	gridss18_26715h	13461.7	-	+
chr1	188640035	188640036	chr9	79645391	79645392	gridss18_81012o	15167.1	-	-
chr1	188640035	188640041	chr16	62987579	62987585	gridss18_60244o	9167.89	-	+
chr1	188640301	188640302	chr12	58923841	58923842	gridss18_13111o	15818.5	+	+
chr1	188641317	188641318	chr21	42620957	42620958	gridss18_81039o	3708.45	-	-
chr1	188641363	188641376	chr12	70863897	70863910	gridss18_37822o	3710.57	+	-
chr1	188690147	188690154	chr3	196707772	196707779	gridss18_60746o	4279.51	-	+
chr1	188690609	188690610	chr1	188690663	188690664	gridss18_38430o	3120.82	+	-
chr1	188690663	188690664	chr1	188690609	188690610	gridss18_38430h	3120.82	-	+
chr1	188693844	188693847	chr5	41837312	41837315	gridss18_60792o	14292.7	-	+
chr1	188698570	188698573	chr12	69306484	69306487	gridss18_13696o	14382.2	+	+
chr1	188701136	188701142	chr12	69445367	69445373	gridss18_60921o	2551.29	-	+
chr1	188732584	188732586	chrX	31180865	31180867	gridss18_61317o	2699.25	-	+
chr1	188741615	188741620	chr10	8465417	8465422	gridss18_39324o	7673.23	+	-
chr1	188780174	188780176	chr13	110177155	110177157	gridss18_61853o	1826.41	-	+
chr1	188782258	188782262	chr10	8753406	8753410	gridss18_14771o	1957.81	+	+
chr1	188784393	188784395	chr20	14537623	14537625	gridss18_61898o	18371.5	-	+
chr1	188787991	188787993	chr12	79194554	79194556	gridss18_82840o	10382.5	-	-
chr1	188805866	188805869	chr10	10736571	10736574	gridss18_62357o	4450.87	-	+
chr1	188831565	188831583	chr12	69410770	69410788	gridss18_41242o	549.07	+	-
chr1	188831710	188831712	chr12	69410824	69410826	gridss18_41243o	7078.69	+	-
chr1	188833506	188833512	chr12	60541344	60541350	gridss18_83960o	9340.95	-	-
chr1	188840945	188840954	chr4	24233317	24233326	gridss18_16047o	13606.3	+	+
chr1	188843126	188843129	chr1	188382927	188382930	gridss18_11526h	10003.8	+	+
chr1	188870896	188870908	chr10	8783669	8783681	gridss18_63703o	9758.6	-	+
chr1	188910212	188910214	chr1	185385384	185385386	gridss18_2295h	2077.71	+	+
chr1	188915746	188915747	chr1	188360606	188360607	gridss18_11332h	1644.05	+	+
chr1	188920704	188920711	chr4	28368962	28368969	gridss18_43179o	1891.06	+	-
chr1	188934001	188934003	chr12	69383070	69383072	gridss18_17770o	2910.23	+	+
chr1	188937596	188937598	chr12	71283359	71283361	gridss18_43592o	14196.4	+	-
chr1	188944079	188944081	chr6	46882434	46882436	gridss18_85800o	4175.05	-	-
chr1	188968985	188968988	chr10	10758826	10758829	gridss18_44107o	3486.75	+	-
chr1	188973695	188973701	chr15	99166356	99166362	gridss18_86177o	6578.19	-	-
chr1	188989098	188989101	chr15	99303704	99303707	gridss18_44470o	14365	+	-
chr1	188993828	188993829	chr12	83573891	83573892	gridss18_86459o	9501.26	-	-
chr1	189095138	189095139	chr16	63030805	63030806	gridss18_19866o	3841.04	+	+
chr1	189097227	189097241	chr1	189097307	189097321	gridss18_19928o	2010.14	+	+
chr1	189097249	189097250	chr10	11002071	11002072	gridss18_19931o	27549	+	+
chr1	189097276	189097278	chr10	11002069	11002071	gridss18_66871o	6186.32	-	+
chr1	189097307	189097321	chr1	189097227	189097241	gridss18_19928h	2010.14	+	+
chr1	189535853	189535855	chr1	190767452	190767454	gridss18_66968o	8015.74	-	+
chr1	189603149	189603150	chr15	74006434	74006435	gridss18_20258o	11785.1	+	+
chr1	189603252	189603259	chr21	38116547	38116554	gridss18_67224o	4190.62	-	+
chr1	189603394	189603399	chr5	134210064	134210069	gridss18_46882o	4418.18	+	-
chr1	190734751	190734752	chr5	134242078	134242079	gridss19_7221o	6060.43	-	+
chr1	190767452	190767454	chr1	189535853	189535855	gridss18_66968h	8015.74	+	-
chr1	194786566	194786567	chr1	180835605	180835606	gridss18_20612h	1807.27	-	+
chr1	194786566	194786567	chr21	28703497	28703498	gridss19_8047o	6657.19	-	+
chr1	194786566	194786568	chr12	69082576	69082578	gridss19_10854o	3916.76	-	-
chr1	194808784	194808786	chr5	41956138	41956140	gridss19_10951o	11177	-	-
chr1	194816275	194816279	chr13	76192669	76192673	gridss19_1078o	11086.2	+	+
chr1	194931161	194931162	chr21	28657152	28657153	gridss19_8548o	5714.63	-	+
chr1	194951131	194951133	chr12	69621952	69621954	gridss19_11566o	757.25	-	-
chr1	194992414	194992415	chr4	25761706	25761707	gridss19_5639o	16722.5	+	-
chr1	248567482	248567486	chr1	248567548	248567552	gridss24_8016o	5721.29	-	+
chr1	248567502	248567503	chr1	248567545	248567546	gridss24_8022o	3432.4	-	+
chr1	248567545	248567546	chr1	248567502	248567503	gridss24_8022h	3432.4	+	-
chr1	248567548	248567552	chr1	248567482	248567486	gridss24_8016h	5721.29	+	-
chr2	1659881	1659882	chr21	43005559	43005560	gridss27_2400o	799.63	+	-
chr2	4610294	4610297	chr13	66014519	66014522	gridss27_5882o	1373.73	-	+
chr2	16406392	16406393	chr2	16407987	16407988	gridss28_6215o	553.08	-	+
chr2	16407987	16407988	chr2	16406392	16406393	gridss28_6215h	553.08	+	-
chr2	33141017	33141292	chr8	66487279	66487554	gridss30_15530o	731.15	-	-
chr2	107919321	107919322	chr10	3284908	3284909	gridss37_5007o	799.4	-	+
chr2	107919352	107919353	chr10	3284907	3284908	gridss37_3355o	1301.5	+	-
chr2	125766559	125766561	chr2	125768247	125768249	gridss39_2912o	541.31	+	-
chr2	125768247	125768249	chr2	125766559	125766561	gridss39_2912h	541.31	-	+
chr2	156976477	156976481	chr5	24677420	24677424	gridss42_6558o	9619.77	-	+
chr2	156978354	156978364	chr12	69246303	69246313	gridss42_4393o	8420.53	+	-
chr2	158645392	158645398	chr12	82478639	82478645	gridss42_6766o	16263.4	-	+
chr2	158670933	158670935	chr1	178297756	178297758	gridss17_10673h	14392.6	+	+
chr2	158704130	158704133	chr12	69275299	69275302	gridss42_8563o	11480	-	-
chr2	158719084	158719100	chr2	158719396	158719412	gridss42_5079o	3733.69	+	-
chr2	158719396	158719412	chr2	158719084	158719100	gridss42_5079h	3733.69	-	+
chr2	158750299	158750302	chr10	5200064	5200067	gridss42_2102o	10468.3	+	+
chr2	178287636	178287637	chr2	178288061	178288062	gridss44_4355o	545.07	+	-
chr2	178288061	178288062	chr2	178287636	178287637	gridss44_4355h	545.07	-	+
chr2	233291864	233291868	chr15	99688565	99688569	gridss50_7319o	737	-	-
chr3	126358921	126358938	chr3	126359249	126359266	gridss64_4038o	731.83	+	-
chr3	126359249	126359266	chr3	126358921	126358938	gridss64_4038h	731.83	-	+
chr3	189575893	189575912	chr3	189576216	189576235	gridss70_5805o	501.07	+	-
chr3	189576216	189576235	chr3	189575893	189575912	gridss70_5805h	501.07	-	+
chr3	192786915	192786920	chr12	69157851	69157856	gridss71_7870o	12092	-	-
chr3	192788049	192788054	chr10	12289421	12289426	gridss71_579o	2162.07	+	+
chr3	192792804	192792805	chr1	185365773	185365774	gridss18_69519h	2473.39	-	-
chr3	192793758	192793762	chr10	8246148	8246152	gridss71_2988o	3045.23	+	-
chr3	195373407	195373545	chr12	84406863	84407006	gridss71_6536o	686.3	-	+
chr3	195666912	195666914	chr5	295224	295226	gridss71_6646o	5865.18	-	+
chr3	195668805	195668808	chr12	84406861	84406864	gridss71_1263o	10287.1	+	+
chr3	195683651	195683652	chr12	75552054	75552055	gridss71_6657o	7835.44	-	+
chr3	195709592	195709595	chr12	58010070	58010073	gridss71_4407o	5155.5	+	-
chr3	196654144	196654146	chr5	21513095	21513097	gridss71_8859o	7077.11	-	-
chr3	196674622	196674624	chr15	85544477	85544479	gridss71_4944o	11157.9	+	-
chr3	196700030	196700031	chr1	188346403	188346404	gridss18_35330h	3575.44	-	+
chr3	196707772	196707779	chr1	188690147	188690154	gridss18_60746h	4279.51	+	-
chr3	196713974	196713975	chr12	60542079	60542080	gridss71_7040o	12181.2	-	+
chr3	196722416	196722419	chr21	46823576	46823579	gridss71_1740o	18459.8	+	+
chr4	8151633	8151636	chr21	22887484	22887487	gridss72_11634o	8365.81	-	+
chr4	8241166	8241168	chr5	907173	907175	gridss72_7442o	15042.9	+	-
chr4	8375688	8375694	chr6	114199451	114199457	gridss72_12106o	8455.3	-	+
chr4	8392121	8392123	chr13	69808987	69808989	gridss72_7616o	14722.5	+	-
chr4	8431004	8431008	chr1	188610757	188610761	gridss18_80733h	6382.21	-	-
chr4	8439594	8439596	chr10	8755517	8755519	gridss72_16234o	3789.76	-	-
chr4	8439651	8439652	chr12	75626330	75626331	gridss72_2231o	4026.57	+	+
chr4	8440738	8440749	chr21	42846160	42846171	gridss72_7731o	6700.34	+	-
chr4	8605489	8605495	chr12	69546414	69546420	gridss72_12305o	16669.3	-	+
chr4	8613431	8613432	chr12	69248228	69248229	gridss72_2326o	14251.8	+	+
chr4	8785646	8785647	chr10	8061833	8061834	gridss72_12393o	6418.61	-	+
chr4	8785646	8785647	chrUn_gl000220	136008	136009	gridss72_16352o	1427.47	-	-
chr4	8785770	8785777	chr12	75735195	75735202	gridss72_2367o	10444.1	+	+
chr4	8994230	8994232	chr5	1290046	1290048	gridss72_12435o	764.23	-	+
chr4	8994230	8994235	chr5	1290382	1290387	gridss72_12436o	1671.97	-	+
chr4	9031161	9031164	chr12	84377656	84377659	gridss72_16553o	2682.27	-	-
chr4	9114088	9114091	chr1	185892403	185892406	gridss18_50801h	9081.74	+	-
chr4	9118991	9118993	chr13	81936721	81936723	gridss72_13206o	4646.63	-	+
chr4	9119727	9119729	chr12	69450375	69450377	gridss72_3157o	4090.78	+	+
chr4	9146989	9146993	chr9	78897308	78897312	gridss72_9072o	8030.6	+	-
chr4	9394359	9394361	chr12	70792509	70792511	gridss72_9613o	7336.76	+	-
chr4	11755139	11755147	chr1	170849712	170849720	gridss17_38089h	8437.82	-	-
chr4	11772960	11772961	chr1	171804824	171804825	gridss17_39770h	7097.96	-	-
chr4	11779643	11779646	chr12	78945280	78945283	gridss73_8729o	8736.04	-	+
chr4	11782497	11782498	chr1	172215360	172215361	gridss17_30352h	12336.1	+	-
chr4	11812721	11812722	chr4	28650620	28650621	gridss73_706o	6911.11	+	+
chr4	11842020	11842024	chr12	75916968	75916972	gridss73_4397o	7345.99	+	-
chr4	11888369	11888370	chr12	69199594	69199595	gridss73_9036o	14166.6	-	+
chr4	11972764	11972767	chr13	112723943	112723946	gridss73_1196o	13066	+	+
chr4	12546067	12546071	chr12	70819975	70819979	gridss73_9470o	5686.1	-	+
chr4	12727503	12727508	chr4	23846387	23846392	gridss73_6063o	1003.3	+	-
chr4	23846387	23846392	chr4	12727503	12727508	gridss73_6063h	1003.3	-	+
chr4	23970483	23970486	chr10	12117306	12117309	gridss74_6104o	5234.45	+	-
chr4	24001873	24001874	chr1	186234201	186234202	gridss18_74977h	2785.01	-	-
chr4	24001992	24001996	chr10	10825210	10825214	gridss74_1197o	3741.4	+	+
chr4	24167413	24167416	chr1	178264520	178264523	gridss17_49047h	5428.41	-	-
chr4	24195910	24195914	chr12	75572564	75572568	gridss74_6264o	3943.67	+	-
chr4	24201360	24201361	chr12	95495109	95495110	gridss74_16291o	14656.4	-	-
chr4	24208473	24208474	chr4	24208499	24208500	gridss74_6322o	720.14	+	-
chr4	24208499	24208500	chr4	24208473	24208474	gridss74_6322h	720.14	-	+
chr4	24225184	24225185	chr15	98815851	98815852	gridss74_6456o	12837.1	+	-
chr4	24232760	24232762	chr5	42181267	42181269	gridss74_16398o	11017.6	-	-
chr4	24233317	24233326	chr1	188840945	188840954	gridss18_16047h	13606.3	+	+
chr4	25761706	25761707	chr1	194992414	194992415	gridss19_5639h	16722.5	-	+
chr4	25769513	25769514	chr15	85262535	85262536	gridss74_7020o	14491	+	-
chr4	26761141	26761147	chr12	82662359	82662365	gridss74_16935o	10405	-	-
chr4	26763791	26763792	chr12	84484684	84484685	gridss74_16945o	513.26	-	-
chr4	26795867	26795868	chr12	75617760	75617761	gridss74_7619o	4542.76	+	-
chr4	26795873	26795874	chr12	75617770	75617771	gridss74_2115o	12361.6	+	+
chr4	28074532	28074533	chr9	79675024	79675025	gridss74_13078o	14379.8	-	+
chr4	28075717	28075718	chr12	58923667	58923668	gridss74_8013o	2246.88	+	-
chr4	28075730	28075733	chr12	58923667	58923670	gridss74_8015o	5939.43	+	-
chr4	28136469	28136470	chr21	28714250	28714251	gridss74_8323o	11426.6	+	-
chr4	28181953	28181955	chr1	188409651	188409653	gridss18_36065h	7256.91	-	+
chr4	28185868	28185871	chr12	69110016	69110019	gridss74_8339o	1656.95	+	-
chr4	28195361	28195364	chrX	31187931	31187934	gridss74_17525o	11692.5	-	-
chr4	28359215	28359218	chr20	14477259	14477262	gridss74_9210o	11034.3	+	-
chr4	28368962	28368969	chr1	188920704	188920711	gridss18_43179h	1891.06	-	+
chr4	28414493	28414497	chr21	42113540	42113544	gridss74_9296o	1892.27	+	-
chr4	28437502	28437504	chr21	42372131	42372133	gridss74_18170o	6997.91	-	-
chr4	28511681	28511682	chr1	171613091	171613092	gridss17_27473h	6671.03	+	-
chr4	28511681	28511682	chr1	171613118	171613119	gridss17_27474h	786.98	+	-
chr4	28601489	28601490	chr1	185983782	185983783	gridss18_72345h	9525.38	-	-
chr4	28624621	28624624	chr12	69463686	69463689	gridss74_14420o	9849.88	-	+
chr4	28624908	28624910	chr1	186089192	186089194	gridss18_28597h	17521.3	-	+
chr4	28628099	28628102	chr12	82472977	82472980	gridss74_9915o	12287.6	+	-
chr4	28650620	28650621	chr4	11812721	11812722	gridss73_706h	6911.11	+	+
chr4	28724252	28724254	chr15	96321895	96321897	gridss74_4046o	7437.81	+	+
chr4	28895831	28895837	chr6	46633158	46633164	gridss74_19082o	742.7	-	-
chr4	28900505	28900507	chr12	83665857	83665859	gridss74_4099o	6041.63	+	+
chr4	101390633	101390636	chr4	101390812	101390815	gridss82_2041o	647.02	+	-
chr4	101390812	101390815	chr4	101390633	101390636	gridss82_2041h	647.02	-	+
chr5	291390	291393	chr5	24665014	24665017	gridss94_10330o	10236.9	-	-
chr5	295224	295226	chr3	195666912	195666914	gridss71_6646h	5865.18	+	-
chr5	376618	376619	chr5	376666	376667	gridss94_7693o	694.33	-	+
chr5	376666	376667	chr5	376618	376619	gridss94_7693h	694.33	+	-
chr5	907173	907175	chr4	8241166	8241168	gridss72_7442h	15042.9	-	+
chr5	945970	945972	chr12	92905447	92905449	gridss94_3242o	10325.5	+	-
chr5	1056086	1056087	chr9	87106808	87106809	gridss94_3471o	17974.4	+	-
chr5	1056105	1056106	chr9	87106808	87106809	gridss94_10746o	560.67	-	-
chr5	1215275	1215276	chr6	46890346	46890347	gridss94_8117o	5439.58	-	+
chr5	1229088	1229095	chr21	28596168	28596175	gridss94_8147o	10863.6	-	+
chr5	1276768	1276776	chr5	1276822	1276830	gridss94_4079o	2464.07	+	-
chr5	1276822	1276830	chr5	1276768	1276776	gridss94_4079h	2464.07	-	+
chr5	1290046	1290048	chr4	8994230	8994232	gridss72_12435h	764.23	+	-
chr5	1290382	1290387	chr4	8994230	8994235	gridss72_12436h	1671.97	+	-
chr5	1298300	1298302	chr15	99488630	99488632	gridss94_4239o	4025.25	+	-
chr5	1328573	1328579	chr1	183864028	183864034	gridss18_22907h	12519	-	+
chr5	1333340	1333394	chr5	1333468	1333480	gridss94_4312o	809	+	-
chr5	1333468	1333480	chr5	1333340	1333394	gridss94_4312h	809	-	+
chr5	1333638	1333639	chr5	1333810	1333811	gridss94_4340o	795	+	-
chr5	1333810	1333811	chr5	1333638	1333639	gridss94_4340h	795	-	+
chr5	1336113	1336115	chr12	58007678	58007680	gridss94_4414o	9797.27	+	-
chr5	1341653	1341655	chr1	186267402	186267404	gridss18_7599h	13636.2	+	+
chr5	1350094	1350097	chr1	185712882	185712885	gridss18_69726h	12083	-	-
chr5	1389471	1389474	chr1	185934190	185934193	gridss18_26340h	16103.3	-	+
chr5	1418641	1418642	chr20	14614961	14614962	gridss94_1339o	19702.6	+	+
chr5	12811016	12811019	chr5	12820523	12820526	gridss95_2282o	698.56	+	-
chr5	12820523	12820526	chr5	12811016	12811019	gridss95_2282h	698.56	-	+
chr5	21480171	21480173	chr5	39440895	39440897	gridss96_4476o	9454.53	-	+
chr5	21492699	21492700	chr12	67865731	67865732	gridss96_251o	6087.47	+	+
chr5	21496356	21496359	chr21	42882108	42882111	gridss96_4527o	7808.12	-	+
chr5	21501152	21501157	chr21	21086894	21086899	gridss96_265o	1980.01	+	+
chr5	21513095	21513097	chr3	196654144	196654146	gridss71_8859h	7077.11	-	-
chr5	21519027	21519029	chr21	23871349	23871351	gridss96_283o	3468.18	+	+
chr5	24347415	24347416	chr12	78990819	78990820	gridss96_4966o	8145.53	-	+
chr5	24347415	24347416	chr21	35192083	35192084	gridss96_4967o	764.75	-	+
chr5	24347557	24347560	chr12	58009435	58009438	gridss96_2700o	11117.2	+	-
chr5	24665014	24665017	chr5	291390	291393	gridss94_10330h	10236.9	-	-
chr5	24677420	24677424	chr2	156976477	156976481	gridss42_6558h	9619.77	+	-
chr5	24694749	24694754	chr12	95455881	95455886	gridss96_5082o	12889.1	-	+
chr5	24713862	24713865	chr21	21086736	21086739	gridss96_2946o	14605.3	+	-
chr5	33200858	33200870	chr5	33201171	33201183	gridss97_2500o	566.11	+	-
chr5	33201171	33201183	chr5	33200858	33200870	gridss97_2500h	566.11	-	+
chr5	39427026	39427029	chr12	70757127	70757130	gridss97_6053o	14558.1	-	+
chr5	39440895	39440897	chr5	21480171	21480173	gridss96_4476h	9454.53	+	-
chr5	39837923	39837924	chr21	42732084	42732085	gridss97_6199o	12505.7	-	+
chr5	39841675	39841682	chr10	10533013	10533020	gridss97_1559o	15639.7	+	+
chr5	41500831	41500835	chr21	27526088	27526092	gridss98_7542o	23559.1	-	+
chr5	41541611	41541615	chr1	183831423	183831427	gridss18_48381h	27506.3	+	-
chr5	41732213	41732218	chr6	114212494	114212499	gridss98_7890o	12310.6	-	+
chr5	41764013	41764017	chr12	83576130	83576134	gridss98_4070o	853.2	+	-
chr5	41837312	41837315	chr1	188693844	188693847	gridss18_60792h	14292.7	+	-
chr5	41853241	41853451	chr12	71622277	71622448	gridss98_8277o	933.32	-	+
chr5	41853449	41853450	chr12	83583371	83583372	gridss98_11257o	6726.53	-	-
chr5	41853517	41853519	chr10	10514663	10514665	gridss98_4491o	10766.3	+	-
chr5	41911584	41911587	chr21	27483998	27484001	gridss98_11279o	10602.2	-	-
chr5	41956138	41956140	chr1	194808784	194808786	gridss19_10951h	11177	-	-
chr5	41960420	41960423	chr10	8061316	8061319	gridss98_4744o	8823.23	+	-
chr5	42055009	42055010	chr10	8040094	8040095	gridss98_11764o	7234.24	-	-
chr5	42089635	42089636	chrX	146750647	146750648	gridss98_8937o	704.95	-	+
chr5	42165152	42165153	chr12	70430511	70430512	gridss98_2286o	10005.3	+	+
chr5	42165927	42165941	chr5	42167769	42167783	gridss98_6161o	6621.28	+	-
chr5	42167769	42167783	chr5	42165927	42165941	gridss98_6161h	6621.28	-	+
chr5	42175548	42175550	chr12	83812453	83812455	gridss98_9569o	9582.75	-	+
chr5	42177898	42177903	chr10	10513278	10513283	gridss98_6220o	8634.85	+	-
chr5	42181267	42181269	chr4	24232760	24232762	gridss74_16398h	11017.6	-	-
chr5	42182255	42182258	chr10	10507512	10507515	gridss98_6252o	14883	+	-
chr5	53176927	53176941	chr5	53177233	53177247	gridss99_2361o	513.14	+	-
chr5	53177233	53177247	chr5	53176927	53176941	gridss99_2361h	513.14	-	+
chr5	57323475	57323478	chr5	57333778	57333781	gridss99_3585o	778.72	+	-
chr5	57333778	57333781	chr5	57323475	57323478	gridss99_3585h	778.72	-	+
chr5	103030553	103030567	chr5	103030879	103030893	gridss104_2205o	606.99	+	-
chr5	103030879	103030893	chr5	103030553	103030567	gridss104_2205h	606.99	-	+
chr5	134210064	134210065	chr21	38116553	38116554	gridss107_6101o	6447.95	-	+
chr5	134210064	134210069	chr1	189603394	189603399	gridss18_46882h	4418.18	-	+
chr5	134242078	134242079	chr1	190734751	190734752	gridss19_7221h	6060.43	+	-
chr6	666375	666376	chr6	667821	667822	gridss113_1647o	622.77	+	-
chr6	667821	667822	chr6	666375	666376	gridss113_1647h	622.77	-	+
chr6	16884964	16884968	chr6	16886093	16886097	gridss114_3559o	609.55	+	-
chr6	16886093	16886097	chr6	16884964	16884968	gridss114_3559h	609.55	-	+
chr6	27162913	27162918	chr17	41401193	41401198	gridss115_5111o	897.29	-	+
chr6	33125919	33125920	chr6	33126843	33126844	gridss116_2924o	587.57	+	-
chr6	33126843	33126844	chr6	33125919	33125920	gridss116_2924h	587.57	-	+
chr6	45912857	45912862	chr12	95434140	95434145	gridss117_9952o	6166.82	-	-
chr6	45918969	45918971	chr13	58570016	58570018	gridss117_4370o	8583.79	+	-
chr6	46216912	46216913	chr10	8987974	8987975	gridss117_7591o	10687.7	-	+
chr6	46271425	46271426	chr15	91537459	91537460	gridss117_1209o	4205.07	+	+
chr6	46415778	46415787	chr13	76557935	76557944	gridss117_7793o	7275.91	-	+
chr6	46429258	46429259	chr9	84216050	84216051	gridss117_1250o	8216.36	+	+
chr6	46633158	46633164	chr4	28895831	28895837	gridss74_19082h	742.7	-	-
chr6	46853145	46853148	chr9	83423773	83423776	gridss117_5797o	9994.37	+	-
chr6	46882434	46882436	chr1	188944079	188944081	gridss18_85800h	4175.05	-	-
chr6	46890346	46890347	chr5	1215275	1215276	gridss94_8117h	5439.58	+	-
chr6	57478147	57478160	chr6	57478855	57478868	gridss118_3437o	617.31	+	-
chr6	57478855	57478868	chr6	57478147	57478160	gridss118_3437h	617.31	-	+
chr6	68101526	68101533	chr6	68112161	68112168	gridss119_2315o	519	+	-
chr6	68112161	68112168	chr6	68101526	68101533	gridss119_2315h	519	-	+
chr6	100034500	100034501	chr6	100035321	100035322	gridss123_1289o	546.49	+	-
chr6	100035321	100035322	chr6	100034500	100034501	gridss123_1289h	546.49	-	+
chr6	114104605	114104608	chr1	185780257	185780260	gridss18_70083h	8346.44	-	-
chr6	114124642	114124644	chr12	70302120	70302122	gridss124_583o	11617.5	+	+
chr6	114125207	114125211	chr21	42148197	42148201	gridss124_6601o	12616.7	-	-
chr6	114132102	114132103	chr12	69082118	69082119	gridss124_2585o	10438.4	+	-
chr6	114146276	114146279	chr12	92886290	92886293	gridss124_6636o	8189.88	-	-
chr6	114148109	114148111	chr13	109805804	109805806	gridss124_2599o	5797.19	+	-
chr6	114178966	114178967	chr10	10514931	10514932	gridss124_5047o	27425.9	-	+
chr6	114184979	114184980	chr6	114185007	114185008	gridss124_2656o	2799.91	+	-
chr6	114185007	114185008	chr6	114184979	114184980	gridss124_2656h	2799.91	-	+
chr6	114199451	114199457	chr4	8375688	8375694	gridss72_12106h	8455.3	+	-
chr6	114212494	114212499	chr5	41732213	41732218	gridss98_7890h	12310.6	+	-
chr7	60154	60160	chr7	60345	60351	gridss131_5764o	772.8	+	-
chr7	60345	60351	chr7	60154	60160	gridss131_5764h	772.8	-	+
chr7	286468	286470	chr7	286501	286503	gridss131_16405o	516.56	-	+
chr7	286501	286503	chr7	286468	286470	gridss131_16405h	516.56	+	-
chr7	299458	299470	chr7	299519	299531	gridss131_16416o	607.81	-	+
chr7	299519	299531	chr7	299458	299470	gridss131_16416h	607.81	+	-
chr7	478610	478611	chr7	478646	478647	gridss131_6214o	686.29	+	-
chr7	478646	478647	chr7	478610	478611	gridss131_6214h	686.29	-	+
chr7	522504	522507	chr7	523275	523278	gridss131_16542o	704.77	-	+
chr7	523275	523278	chr7	522504	522507	gridss131_16542h	704.77	+	-
chr7	1185063	1185078	chr7	1187654	1187669	gridss131_7117o	1033.87	+	-
chr7	1187654	1187669	chr7	1185063	1185078	gridss131_7117h	1033.87	-	+
chr7	3722136	3722137	chr7	3722182	3722183	gridss131_18583o	610.24	-	+
chr7	3722182	3722183	chr7	3722136	3722137	gridss131_18583h	610.24	+	-
chr7	5538959	5538982	chr7	5538992	5539015	gridss131_12128o	582.66	+	-
chr7	5538992	5539015	chr7	5538959	5538982	gridss131_12128h	582.66	-	+
chr7	12024229	12024244	chr7	12024499	12024514	gridss132_6668o	654.67	+	-
chr7	12024499	12024514	chr7	12024229	12024244	gridss132_6668h	654.67	-	+
chr7	12519912	12519913	chr7	12519987	12519988	gridss132_15152o	599.84	-	+
chr7	12519987	12519988	chr7	12519912	12519913	gridss132_15152h	599.84	+	-
chr7	13122264	13122275	chr7	13122302	13122313	gridss132_7642o	592.3	+	-
chr7	13122302	13122313	chr7	13122264	13122275	gridss132_7642h	592.3	-	+
chr7	13296541	13296542	chr7	13296558	13296559	gridss132_7782o	982.91	+	-
chr7	13296558	13296559	chr7	13296541	13296542	gridss132_7782h	982.91	-	+
chr7	13585644	13585648	chr7	13591240	13591244	gridss132_8051o	1837.42	+	-
chr7	13591240	13591244	chr7	13585644	13585648	gridss132_8051h	1837.42	-	+
chr7	13663188	13663193	chr7	13663455	13663460	gridss132_8114o	749.03	+	-
chr7	13663455	13663460	chr7	13663188	13663193	gridss132_8114h	749.03	-	+
chr7	14227987	14228003	chr7	14228306	14228322	gridss132_8627o	552.28	+	-
chr7	14228306	14228322	chr7	14227987	14228003	gridss132_8627h	552.28	-	+
chr7	16936286	16936301	chr7	16936626	16936641	gridss132_11182o	613.15	+	-
chr7	16936626	16936641	chr7	16936286	16936301	gridss132_11182h	613.15	-	+
chr7	17969695	17969696	chr7	17969766	17969767	gridss132_12133o	529.5	+	-
chr7	17969766	17969767	chr7	17969695	17969696	gridss132_12133h	529.5	-	+
chr7	18016419	18016424	chr7	18016457	18016462	gridss132_12174o	520.89	+	-
chr7	18016457	18016462	chr7	18016419	18016424	gridss132_12174h	520.89	-	+
chr7	20737696	20737704	chr15	99793836	99793844	gridss133_16075o	9626.73	-	+
chr7	20743912	20743914	chr1	188016178	188016180	gridss18_57055h	10973.6	+	-
chr7	20748783	20748786	chr7	20753577	20753580	gridss133_6119o	2307.16	+	-
chr7	20753577	20753580	chr7	20748783	20748786	gridss133_6119h	2307.16	-	+
chr7	22434799	22434803	chr7	22436760	22436764	gridss133_7836o	2239.65	+	-
chr7	22436760	22436764	chr7	22434799	22434803	gridss133_7836h	2239.65	-	+
chr7	24038160	24038165	chr7	24040070	24040075	gridss133_9445o	2259.26	+	-
chr7	24040070	24040075	chr7	24038160	24038165	gridss133_9445h	2259.26	-	+
chr7	24068314	24068316	chr7	24068519	24068521	gridss133_17921o	1111.65	-	+
chr7	24068519	24068521	chr7	24068314	24068316	gridss133_17921h	1111.65	+	-
chr7	24677924	24677942	chr7	24678248	24678266	gridss133_10089o	746.93	+	-
chr7	24678248	24678266	chr7	24677924	24677942	gridss133_10089h	746.93	-	+
chr7	25044600	25044613	chr7	25044930	25044943	gridss133_10481o	995.3	+	-
chr7	25044930	25044943	chr7	25044600	25044613	gridss133_10481h	995.3	-	+
chr7	25959852	25959859	chr7	25959919	25959926	gridss133_18968o	525.87	-	+
chr7	25959919	25959926	chr7	25959852	25959859	gridss133_18968h	525.87	+	-
chr7	28015958	28015963	chr7	28016001	28016006	gridss133_13543o	859.78	+	-
chr7	28016001	28016006	chr7	28015958	28015963	gridss133_13543h	859.78	-	+
chr7	28214299	28214304	chr7	28214664	28214669	gridss133_13778o	2371.33	+	-
chr7	28214664	28214669	chr7	28214299	28214304	gridss133_13778h	2371.33	-	+
chr7	30535582	30535601	chr7	30535911	30535930	gridss134_5104o	616.37	+	-
chr7	30535911	30535930	chr7	30535582	30535601	gridss134_5104h	616.37	-	+
chr7	32168926	32168932	chr7	32169172	32169178	gridss134_6778o	828.61	+	-
chr7	32169172	32169178	chr7	32168926	32168932	gridss134_6778h	828.61	-	+
chr7	32201199	32201200	chr7	32201227	32201228	gridss134_6814o	1030.09	+	-
chr7	32201227	32201228	chr7	32201199	32201200	gridss134_6814h	1030.09	-	+
chr7	32390150	32390165	chr7	32393112	32393127	gridss134_7027o	1311.7	+	-
chr7	32393112	32393127	chr7	32390150	32390165	gridss134_7027h	1311.7	-	+
chr7	33403530	33403546	chr7	33403859	33403875	gridss134_8050o	995.35	+	-
chr7	33403859	33403875	chr7	33403530	33403546	gridss134_8050h	995.35	-	+
chr7	33898840	33898856	chr7	33899172	33899188	gridss134_8553o	970.51	+	-
chr7	33899172	33899188	chr7	33898840	33898856	gridss134_8553h	970.51	-	+
chr7	34495593	34495597	chr7	34495719	34495723	gridss134_9164o	594.09	+	-
chr7	34495719	34495723	chr7	34495593	34495597	gridss134_9164h	594.09	-	+
chr7	34924137	34924138	chr7	34924175	34924176	gridss134_9563o	569.61	+	-
chr7	34924175	34924176	chr7	34924137	34924138	gridss134_9563h	569.61	-	+
chr7	36878878	36878880	chr7	36878968	36878970	gridss134_11463o	717.17	+	-
chr7	36878968	36878970	chr7	36878878	36878880	gridss134_11463h	717.17	-	+
chr7	37477276	37477290	chr7	37477604	37477618	gridss134_12100o	973.27	+	-
chr7	37477604	37477618	chr7	37477276	37477290	gridss134_12100h	973.27	-	+
chr7	37998506	37998516	chr7	37998822	37998832	gridss134_12613o	1448.68	+	-
chr7	37998822	37998832	chr7	37998506	37998516	gridss134_12613h	1448.68	-	+
chr7	38265178	38265183	chr7	38265211	38265216	gridss134_12842o	549.03	+	-
chr7	38265211	38265216	chr7	38265178	38265183	gridss134_12842h	549.03	-	+
chr7	38451148	38451151	chr7	54196364	54196367	gridss134_13027o	1836.21	+	-
chr7	40761607	40761608	chr7	62976847	62976848	gridss135_18589o	773.92	-	-
chr7	40879375	40879376	chr7	40880469	40880470	gridss135_18654o	2024.59	-	-
chr7	40880469	40880470	chr7	40879375	40879376	gridss135_18654h	2024.59	-	-
chr7	41317735	41317741	chr7	41317786	41317792	gridss135_5517o	555.2	+	-
chr7	41317786	41317792	chr7	41317735	41317741	gridss135_5517h	555.2	-	+
chr7	42549699	42549714	chr7	42550022	42550037	gridss135_6758o	952.77	+	-
chr7	42550022	42550037	chr7	42549699	42549714	gridss135_6758h	952.77	-	+
chr7	42604621	42604637	chr7	42604964	42604980	gridss135_6815o	552.52	+	-
chr7	42604964	42604980	chr7	42604621	42604637	gridss135_6815h	552.52	-	+
chr7	42759279	42759280	chr7	42759298	42759299	gridss135_14873o	712.27	-	+
chr7	42759298	42759299	chr7	42759279	42759280	gridss135_14873h	712.27	+	-
chr7	43219812	43219813	chr7	43219849	43219850	gridss135_15123o	592.38	-	+
chr7	43219849	43219850	chr7	43219812	43219813	gridss135_15123h	592.38	+	-
chr7	43414124	43414125	chr7	43414388	43414389	gridss135_7663o	621.32	+	-
chr7	43414388	43414389	chr7	43414124	43414125	gridss135_7663h	621.32	-	+
chr7	44663095	44663100	chr7	44663207	44663212	gridss135_15945o	773.75	-	+
chr7	44663207	44663212	chr7	44663095	44663100	gridss135_15945h	773.75	+	-
chr7	48012291	48012293	chr7	48012338	48012340	gridss135_12558o	672.93	+	-
chr7	48012338	48012340	chr7	48012291	48012293	gridss135_12558h	672.93	-	+
chr7	49204874	49204875	chr12	69913717	69913718	gridss135_4827o	1270.38	+	+
chr7	54196364	54196367	chr7	38451148	38451151	gridss134_13027h	1836.21	-	+
chr7	54253028	54253031	chr7	54253065	54253068	gridss136_2733o	602.37	+	-
chr7	54253065	54253068	chr7	54253028	54253031	gridss136_2733h	602.37	-	+
chr7	54303496	54303497	chr7	54303521	54303522	gridss136_2772o	761.86	+	-
chr7	54303521	54303522	chr7	54303496	54303497	gridss136_2772h	761.86	-	+
chr7	54632759	54632760	chr7	54632795	54632796	gridss136_3063o	766	+	-
chr7	54632795	54632796	chr7	54632759	54632760	gridss136_3063h	766	-	+
chr7	54817060	54817062	chr7	54817154	54817156	gridss136_6744o	518.32	-	+
chr7	54817154	54817156	chr7	54817060	54817062	gridss136_6744h	518.32	+	-
chr7	55286742	55286758	chr7	55289061	55289077	gridss136_3779o	2766.2	+	-
chr7	55289061	55289077	chr7	55286742	55286758	gridss136_3779h	2766.2	-	+
chr7	56761979	56761984	chr7	56769947	56769952	gridss136_5223o	1300.84	+	-
chr7	56769947	56769952	chr7	56761979	56761984	gridss136_5223h	1300.84	-	+
chr7	57364892	57364906	chr7	57365217	57365231	gridss136_5606o	736.92	+	-
chr7	57365217	57365231	chr7	57364892	57364906	gridss136_5606h	736.92	-	+
chr7	58004539	58004540	chr7	100723358	100723359	gridss136_2161o	782.23	+	+
chr7	62976847	62976848	chr7	40761607	40761608	gridss135_18589h	773.92	-	-
chr7	63123180	63123185	chr7	100290295	100290300	gridss137_1864o	1817.04	+	-
chr7	68462069	68462083	chr7	68462389	68462403	gridss137_4219o	701.67	+	-
chr7	68462389	68462403	chr7	68462069	68462083	gridss137_4219h	701.67	-	+
chr7	70420966	70420969	chr7	70438884	70438887	gridss138_116o	583.78	+	+
chr7	70426184	70426186	chr7	70438879	70438881	gridss138_6618o	1117.93	-	-
chr7	70438879	70438881	chr7	70426184	70426186	gridss138_6618h	1117.93	-	-
chr7	70438884	70438887	chr7	70420966	70420969	gridss138_116h	583.78	+	+
chr7	71211897	71211913	chr7	71212955	71212971	gridss138_2348o	765.96	+	-
chr7	71212955	71212971	chr7	71211897	71211913	gridss138_2348h	765.96	-	+
chr7	73146409	73146410	chr7	88818807	88818808	gridss138_3244o	510.93	+	-
chr7	73764467	73764468	chr7	93101992	93101993	gridss138_3701o	865.43	+	-
chr7	88682029	88682030	chr10	3601313	3601314	gridss139_2480o	923.52	+	-
chr7	88818807	88818808	chr7	73146409	73146410	gridss138_3244h	510.93	-	+
chr7	91080696	91080698	chr7	92986372	92986374	gridss140_1238o	615.05	+	-
chr7	91121556	91121559	chr7	93109654	93109657	gridss140_103o	740.56	+	+
chr7	92986372	92986374	chr7	91080696	91080698	gridss140_1238h	615.05	-	+
chr7	93101992	93101993	chr7	73764467	73764468	gridss138_3701h	865.43	-	+
chr7	93109654	93109657	chr7	91121556	91121559	gridss140_103h	740.56	+	+
chr7	100290295	100290300	chr7	63123180	63123185	gridss137_1864h	1817.04	-	+
chr7	100385560	100385562	chr7	100385596	100385598	gridss141_1494o	631.39	+	-
chr7	100385596	100385598	chr7	100385560	100385562	gridss141_1494h	631.39	-	+
chr7	100553515	100553516	chr7	100553516	100553517	gridss141_4066o	794.6	-	+
chr7	100553516	100553517	chr7	100553515	100553516	gridss141_4066h	794.6	+	-
chr7	100723358	100723359	chr7	58004539	58004540	gridss136_2161h	782.23	+	+
chr8	43092874	43092876	chrX	25127540	25127542	gridss152_3757o	543.1	-	-
chr8	43093153	43093188	chr8	43093234	43093235	gridss152_1545o	701.71	+	-
chr8	43093234	43093235	chr8	43093153	43093188	gridss152_1545h	701.71	-	+
chr8	61204985	61204997	chr8	61205303	61205315	gridss154_1395o	503.19	+	-
chr8	61205303	61205315	chr8	61204985	61204997	gridss154_1395h	503.19	-	+
chr8	66487279	66487554	chr2	33141017	33141292	gridss30_15530h	731.15	-	-
chr8	77337380	77337385	chr8	77338426	77338431	gridss155_2774o	628.36	+	-
chr8	77338426	77338431	chr8	77337380	77337385	gridss155_2774h	628.36	-	+
chr8	97098072	97098088	chr8	97098425	97098441	gridss157_2868o	635.35	+	-
chr8	97098425	97098441	chr8	97098072	97098088	gridss157_2868h	635.35	-	+
chr8	126595120	126595129	chr8	126601134	126601143	gridss160_2845o	575.99	+	-
chr8	126601134	126601143	chr8	126595120	126595129	gridss160_2845h	575.99	-	+
chr9	4346657	4346671	chr9	4346969	4346983	gridss165_1994o	534.58	+	-
chr9	4346969	4346983	chr9	4346657	4346671	gridss165_1994h	534.58	-	+
chr9	68425909	68425910	chrUn_gl000219	56396	56397	gridss171_756o	539.47	+	-
chr9	78897308	78897312	chr4	9146989	9146993	gridss72_9072h	8030.6	-	+
chr9	78918703	78918707	chr12	95570542	95570546	gridss172_3597o	10093.1	+	-
chr9	79194512	79194518	chr12	70898939	70898945	gridss172_5866o	5022.67	-	+
chr9	79337530	79337534	chr9	79337571	79337575	gridss172_4178o	2502.09	+	-
chr9	79337571	79337575	chr9	79337530	79337534	gridss172_4178h	2502.09	-	+
chr9	79347705	79347710	chr9	84175170	84175175	gridss172_4216o	11004.5	+	-
chr9	79348877	79348879	chr9	79348939	79348941	gridss172_7864o	1669.36	-	-
chr9	79348914	79348915	chr1	186253303	186253304	gridss18_7523h	2591.5	+	+
chr9	79348939	79348940	chr1	186253309	186253310	gridss18_30421h	12992.1	-	+
chr9	79348939	79348941	chr9	79348877	79348879	gridss172_7864h	1669.36	-	-
chr9	79467685	79467686	chr21	27839379	27839380	gridss172_1541o	14491.1	+	+
chr9	79645391	79645392	chr16	62987506	62987507	gridss172_8181o	7238.49	-	-
chr9	79645391	79645392	chr1	188640035	188640036	gridss18_81012h	15167.1	-	-
chr9	79645555	79645563	chr16	70277664	70277672	gridss172_1568o	11397.1	+	+
chr9	79645556	79645662	chr16	22480318	22480383	gridss172_4846o	606.88	+	-
chr9	79649846	79649847	chr20	1176719	1176720	gridss172_8183o	1991.21	-	-
chr9	79649921	79649925	chr9	86543112	86543116	gridss172_4850o	1847.65	+	-
chr9	79673924	79673925	chr16	58345220	58345221	gridss172_8188o	18422.1	-	-
chr9	79675024	79675025	chr4	28074532	28074533	gridss74_13078h	14379.8	+	-
chr9	80547707	80547709	chr12	95483653	95483655	gridss173_11071o	11295	-	-
chr9	80556251	80556253	chr12	83562374	83562376	gridss173_3019o	9066.13	+	-
chr9	80815320	80815321	chr13	69590033	69590034	gridss173_8257o	8968.98	-	+
chr9	80815323	80815324	chr9	80880574	80880575	gridss173_11108o	1118.6	-	-
chr9	80815323	80815324	chr13	69590018	69590019	gridss173_8260o	1794.76	-	+
chr9	80815480	80815483	chr16	58344968	58344971	gridss173_110o	12700.9	+	+
chr9	80815482	80815483	chrX	31180388	31180389	gridss173_3081o	6116.87	+	-
chr9	80816792	80816800	chr16	62976751	62976759	gridss173_11114o	8068.23	-	-
chr9	80821877	80821878	chr15	85669531	85669532	gridss173_8275o	1615.99	-	+
chr9	80821896	80821898	chr16	70276091	70276093	gridss173_11128o	1258.47	-	-
chr9	80821933	80821934	chr15	85669526	85669527	gridss173_123o	2627.45	+	+
chr9	80821989	80821991	chr12	70865769	70865771	gridss173_3103o	5577.35	+	-
chr9	80822077	80822079	chr16	62997932	62997934	gridss173_11130o	10654.9	-	-
chr9	80822084	80822086	chr16	62998098	62998100	gridss173_8279o	10410.1	-	+
chr9	80822116	80822117	chr15	85669280	85669281	gridss173_11131o	11390.2	-	-
chr9	80822117	80822119	chrX	31180026	31180028	gridss173_8282o	12207.2	-	+
chr9	80822292	80822303	chr13	69590099	69590110	gridss173_135o	31175.3	+	+
chr9	80822302	80822303	chr9	80886387	80886388	gridss173_133o	8676.41	+	+
chr9	80825107	80825110	chr9	80886081	80886084	gridss173_11136o	13644	-	-
chr9	80825269	80825274	chr12	58923732	58923737	gridss173_148o	3104.3	+	+
chr9	80825273	80825274	chr16	56313787	56313788	gridss173_149o	14859.1	+	+
chr9	80825505	80825510	chr13	76432635	76432640	gridss173_8292o	15748.2	-	+
chr9	80826558	80826561	chr16	70276228	70276231	gridss173_155o	3083.08	+	+
chr9	80826560	80826561	chr15	85669531	85669532	gridss173_154o	7427.27	+	+
chr9	80880574	80880575	chr9	80815323	80815324	gridss173_11108h	1118.6	-	-
chr9	80880623	80880624	chrX	31180134	31180135	gridss173_176o	767.29	+	+
chr9	80886044	80886045	chr15	85669253	85669254	gridss173_11145o	20637.3	-	-
chr9	80886049	80886057	chr13	69589821	69589857	gridss173_11147o	1283.84	-	-
chr9	80886056	80886057	chr15	85669531	85669532	gridss173_8308o	4067.29	-	+
chr9	80886060	80886064	chr9	80886425	80886429	gridss173_11150o	2948.92	-	-
chr9	80886081	80886084	chr9	80825107	80825110	gridss173_11136h	13644	-	-
chr9	80886081	80886082	chr12	58923736	58923737	gridss173_8311o	5104.36	-	+
chr9	80886143	80886159	chr13	69589860	69589876	gridss173_11161o	36831	-	-
chr9	80886156	80886157	chrX	31179872	31179873	gridss173_11164o	15399.6	-	-
chr9	80886318	80886321	chrX	31180019	31180022	gridss173_3147o	13647	+	-
chr9	80886332	80886338	chr16	62998052	62998058	gridss173_179o	7713.35	+	+
chr9	80886341	80886342	chr16	70276199	70276200	gridss173_183o	9169.66	+	+
chr9	80886351	80886353	chrX	31180237	31180239	gridss173_184o	14134	+	+
chr9	80886371	80886372	chrX	31179613	31179614	gridss173_3150o	19594.5	+	-
chr9	80886384	80886388	chr13	69589906	69589910	gridss173_3151o	6282.98	+	-
chr9	80886387	80886388	chr9	80822302	80822303	gridss173_133h	8676.41	+	+
chr9	80886403	80886404	chr15	85669526	85669527	gridss173_8327o	2069.36	-	+
chr9	80886425	80886429	chr9	80886060	80886064	gridss173_11150h	2948.92	-	-
chr9	80886427	80886428	chr13	69589957	69589958	gridss173_3156o	15471.2	+	-
chr9	80886457	80886461	chr15	85669528	85669532	gridss173_189o	6333.86	+	+
chr9	82566194	82566195	chr12	70708006	70708007	gridss173_8515o	4250.1	-	+
chr9	82662705	82662706	chr12	93030062	93030063	gridss173_11439o	12903.5	-	-
chr9	82712632	82712634	chr12	69244500	69244502	gridss173_4089o	2909.87	+	-
chr9	82720615	82720620	chr15	91999225	91999230	gridss173_4121o	6628.4	+	-
chr9	83074309	83074316	chr12	65949333	65949340	gridss173_8849o	11572.1	-	+
chr9	83090998	83091002	chr13	69845099	69845103	gridss173_800o	9432.14	+	+
chr9	83423773	83423776	chr6	46853145	46853148	gridss117_5797h	9994.37	-	+
chr9	83486830	83486836	chr9	83498380	83498386	gridss173_11889o	958.51	-	-
chr9	83492108	83492109	chr9	83495706	83495707	gridss173_963o	865.74	+	+
chr9	83495706	83495707	chr9	83492108	83492109	gridss173_963h	865.74	+	+
chr9	83498380	83498386	chr9	83486830	83486836	gridss173_11889h	958.51	-	-
chr9	83505311	83505313	chr1	188444297	188444299	gridss18_11949h	8795.57	+	+
chr9	84175170	84175175	chr9	79347705	79347710	gridss172_4216h	11004.5	-	+
chr9	84216050	84216051	chr6	46429258	46429259	gridss117_1250h	8216.36	+	+
chr9	85934903	85934908	chr10	8637216	8637221	gridss173_12247o	10442.2	-	-
chr9	85961787	85961788	chr1	172566186	172566187	gridss17_33992h	8748.29	+	-
chr9	86016153	86016155	chr21	28585314	28585316	gridss173_12316o	7702.87	-	-
chr9	86036540	86036545	chr1	186021844	186021849	gridss18_52430h	8270.08	+	-
chr9	86040919	86040922	chr21	43100302	43100305	gridss173_12365o	12881.8	-	-
chr9	86077881	86077886	chr13	90758640	90758645	gridss173_5767o	11036.9	+	-
chr9	86336355	86336360	chr16	70276445	70276450	gridss173_12487o	5208.27	-	-
chr9	86336475	86336485	chr16	58350152	58350162	gridss173_1565o	6060.19	+	+
chr9	86543111	86543112	chr20	1176719	1176720	gridss173_12508o	3739.67	-	-
chr9	86543112	86543116	chr9	79649921	79649925	gridss172_4850h	1847.65	-	+
chr9	86544626	86544630	chr21	28222638	28222642	gridss173_5862o	1590.06	+	-
chr9	86676386	86676388	chr12	58139335	58139337	gridss173_9700o	10946	-	+
chr9	86735114	86735118	chr13	74903190	74903194	gridss173_1743o	7854.35	+	+
chr9	86796890	86796892	chr1	181944007	181944009	gridss18_21590h	10156.7	-	+
chr9	86935078	86935083	chr12	84312246	84312251	gridss173_10177o	4648.98	-	+
chr9	86966988	86966989	chr12	58025030	58025031	gridss173_6917o	11030.4	+	-
chr9	86973560	86973563	chr15	99469425	99469428	gridss173_6950o	12696.1	+	-
chr9	87106808	87106809	chr5	1056105	1056106	gridss94_10746h	560.67	-	-
chr9	87106808	87106809	chr5	1056086	1056087	gridss94_3471h	17974.4	-	+
chr9	87112451	87112453	chr15	91999850	91999852	gridss173_2278o	15791.7	+	+
chr9	87118595	87118600	chr15	96317198	96317203	gridss173_10391o	9550.28	-	+
chr9	87232982	87232983	chr12	79823344	79823345	gridss173_7494o	6545.14	+	-
chr9	87536826	87536831	chrX	31180526	31180531	gridss173_13583o	3021.75	-	-
chr9	87536971	87536976	chr20	1178339	1178344	gridss173_2588o	2144.05	+	+
chr9	87536995	87536996	chr16	58347493	58347494	gridss173_13585o	15951.4	-	-
chr9	87537541	87537546	chr13	74924113	74924118	gridss173_2591o	14327.7	+	+
chr9	138479100	138479102	chr9	138480199	138480201	gridss178_3755o	669.51	+	-
chr9	138480199	138480201	chr9	138479100	138479102	gridss178_3755h	669.51	-	+
chr9	140405480	140405481	chr17	41401320	41401321	gridss179_51o	503.2	+	+
chr9_gl000198_random	61834	61840	chr9_gl000198_random	63272	63278	gridss180_22o	777.57	+	-
chr9_gl000198_random	63272	63278	chr9_gl000198_random	61834	61840	gridss180_22h	777.57	-	+
chr10	3264357	3264364	chrX	31193639	31193646	gridss184_11053o	35098.8	-	+
chr10	3279096	3279097	chr1	188484376	188484377	gridss18_59151h	13561.5	+	-
chr10	3284907	3284908	chr2	107919352	107919353	gridss37_3355h	1301.5	-	+
chr10	3284908	3284909	chr14	106149416	106149417	gridss184_4567o	501.75	+	-
chr10	3284908	3284909	chr2	107919321	107919322	gridss37_5007h	799.4	+	-
chr10	3294044	3294052	chr12	83701251	83701259	gridss184_4650o	8442.54	+	-
chr10	3372670	3372678	chr20	14363224	14363232	gridss184_5018o	7251.95	+	-
chr10	3601313	3601314	chr7	88682029	88682030	gridss139_2480h	923.52	-	+
chr10	5148803	5148805	chr1	184099639	184099641	gridss18_69203h	8496.31	-	-
chr10	5171122	5171125	chr15	92019509	92019512	gridss184_795o	4002.08	+	+
chr10	5200064	5200067	chr2	158750299	158750302	gridss42_2102h	10468.3	+	+
chr10	7865824	7865825	chr16	50020520	50020521	gridss184_11940o	7353.49	-	+
chr10	7942974	7942975	chr10	7942976	7942977	gridss184_12083o	3033.48	-	+
chr10	7942976	7942977	chr10	7942974	7942975	gridss184_12083h	3033.48	+	-
chr10	7951419	7951420	chr12	69777803	69777804	gridss184_1222o	9693.34	+	+
chr10	7956818	7956820	chr1	171688220	171688222	gridss17_39073h	9028.47	-	-
chr10	8015397	8015400	chr12	84100934	84100937	gridss184_12244o	10325.1	-	+
chr10	8023227	8023235	chr1	188383152	188383160	gridss18_58700h	14255.2	+	-
chr10	8026145	8026148	chr10	8518786	8518789	gridss184_1439o	13692.6	+	+
chr10	8040094	8040095	chr5	42055009	42055010	gridss98_11764h	7234.24	-	-
chr10	8061023	8061025	chr12	95315057	95315059	gridss184_1495o	1735.92	+	+
chr10	8061024	8061025	chr12	75593918	75593919	gridss184_1494o	7255.07	+	+
chr10	8061316	8061319	chr5	41960420	41960423	gridss98_4744h	8823.23	-	+
chr10	8061833	8061834	chrUn_gl000220	136114	136115	gridss184_1507o	2288.85	+	+
chr10	8061833	8061834	chr4	8785646	8785647	gridss72_12393h	6418.61	+	-
chr10	8163458	8163462	chr10	8311984	8311988	gridss184_12334o	529.57	-	+
chr10	8215625	8215626	chr16	63000895	63000896	gridss184_16246o	26154.8	-	-
chr10	8221803	8221807	chr12	74324350	74324354	gridss184_1579o	8448.76	+	+
chr10	8239295	8239298	chr13	89820253	89820256	gridss184_6928o	3616.19	+	-
chr10	8246148	8246152	chr3	192793758	192793762	gridss71_2988h	3045.23	-	+
chr10	8311984	8311988	chr10	8163458	8163462	gridss184_12334h	529.57	+	-
chr10	8386690	8386695	chr15	91449828	91449833	gridss184_16694o	10804.4	-	-
chr10	8391893	8391895	chr12	69444306	69444308	gridss184_12854o	7055.59	-	+
chr10	8406083	8406085	chr13	89469755	89469757	gridss184_2038o	11088.5	+	+
chr10	8413946	8413949	chr12	95528628	95528631	gridss184_7730o	13406.2	+	-
chr10	8418029	8418032	chr13	69798694	69798697	gridss184_7748o	10025.4	+	-
chr10	8436522	8436523	chr12	58923898	58923899	gridss184_13011o	4425.23	-	+
chr10	8436522	8436525	chr15	85669473	85669476	gridss184_13012o	8542.46	-	+
chr10	8462196	8462198	chr13	69861991	69861993	gridss184_16972o	4530.72	-	-
chr10	8465417	8465422	chr1	188741615	188741620	gridss18_39324h	7673.23	-	+
chr10	8469009	8469012	chr1	181849693	181849696	gridss18_527h	15938.7	+	+
chr10	8472487	8472492	chr12	58026619	58026624	gridss184_7981o	8475.89	+	-
chr10	8476189	8476190	chr1	188328946	188328947	gridss18_78916h	3080.46	-	-
chr10	8476858	8476861	chr10	9197502	9197505	gridss184_7995o	3140.29	+	-
chr10	8481290	8481291	chr12	74255514	74255515	gridss184_17047o	3714.92	-	-
chr10	8483963	8483968	chr12	75593575	75593580	gridss184_17056o	11699	-	-
chr10	8494789	8494792	chr12	69392482	69392485	gridss184_2296o	3191.49	+	+
chr10	8518786	8518789	chr10	8026145	8026148	gridss184_1439h	13692.6	+	+
chr10	8637216	8637221	chr9	85934903	85934908	gridss173_12247h	10442.2	-	-
chr10	8727570	8727575	chr12	82511245	82511250	gridss184_8867o	11033.2	+	-
chr10	8753406	8753410	chr1	188782258	188782262	gridss18_14771h	1957.81	+	+
chr10	8755517	8755518	chr12	75626331	75626332	gridss184_13645o	10355.1	-	+
chr10	8755517	8755519	chr4	8439594	8439596	gridss72_16234h	3789.76	-	-
chr10	8761132	8761135	chr12	74255142	74255145	gridss184_13658o	10466.5	-	+
chr10	8783669	8783681	chr1	188870896	188870908	gridss18_63703h	9758.6	+	-
chr10	8812477	8812479	chr13	91036326	91036328	gridss184_13801o	9801.35	-	+
chr10	8861690	8861691	chr10	8861713	8861714	gridss184_9529o	928.55	+	-
chr10	8861713	8861714	chr10	8861690	8861691	gridss184_9529h	928.55	-	+
chr10	8882380	8882386	chr12	66249264	66249270	gridss184_3203o	4141.63	+	+
chr10	8917415	8917416	chr12	71242711	71242712	gridss184_3280o	11129.6	+	+
chr10	8975081	8975085	chr12	71514885	71514889	gridss184_14168o	5241.83	-	+
chr10	8987974	8987975	chr6	46216912	46216913	gridss117_7591h	10687.7	+	-
chr10	9197502	9197505	chr10	8476858	8476861	gridss184_7995h	3140.29	-	+
chr10	9241162	9241163	chr15	90873669	90873670	gridss184_3361o	4029.05	+	+
chr10	9429941	9429949	chr12	71029753	71029761	gridss184_18195o	7356.73	-	-
chr10	9436188	9436189	chr10	9436251	9436252	gridss184_9989o	3663.96	+	-
chr10	9436251	9436252	chr10	9436188	9436189	gridss184_9989h	3663.96	-	+
chr10	9438207	9438233	chr10	9438376	9438402	gridss184_10001o	3020.85	+	-
chr10	9438376	9438402	chr10	9438207	9438233	gridss184_10001h	3020.85	-	+
chr10	9513972	9513973	chr10	9514047	9514048	gridss184_14445o	7166.32	-	+
chr10	9514047	9514048	chr10	9513972	9513973	gridss184_14445h	7166.32	+	-
chr10	9519810	9519828	chr10	9520117	9520135	gridss184_10305o	6285.55	+	-
chr10	9520117	9520135	chr10	9519810	9519828	gridss184_10305h	6285.55	-	+
chr10	9647802	9647804	chr15	96145921	96145923	gridss184_3774o	6292.89	+	+
chr10	10507512	10507515	chr5	42182255	42182258	gridss98_6252h	14883	-	+
chr10	10509731	10509737	chr20	14400898	14400904	gridss185_3351o	10299.7	+	-
chr10	10513278	10513283	chr5	42177898	42177903	gridss98_6220h	8634.85	-	+
chr10	10514663	10514664	chr12	83583371	83583372	gridss185_12523o	15212.1	-	-
chr10	10514663	10514664	chr12	71622274	71622275	gridss185_9178o	7588.85	-	+
chr10	10514663	10514665	chr5	41853517	41853519	gridss98_4491h	10766.3	-	+
chr10	10514931	10514932	chr6	114178966	114178967	gridss124_5047h	27425.9	+	-
chr10	10518452	10518456	chr12	75601535	75601539	gridss185_3405o	8133.63	+	-
chr10	10522819	10522820	chr15	91619188	91619189	gridss185_9223o	13178.5	-	+
chr10	10533013	10533020	chr5	39841675	39841682	gridss97_1559h	15639.7	+	+
chr10	10571649	10571650	chr10	10571678	10571679	gridss185_3685o	2249.21	+	-
chr10	10571678	10571679	chr10	10571649	10571650	gridss185_3685h	2249.21	-	+
chr10	10579908	10579909	chr12	69410732	69410733	gridss185_9398o	13329.6	-	+
chr10	10651642	10651645	chr12	58031476	58031479	gridss185_611o	14071.3	+	+
chr10	10708534	10708543	chr10	10708852	10708861	gridss185_4527o	6883.24	+	-
chr10	10708852	10708861	chr10	10708534	10708543	gridss185_4527h	6883.24	-	+
chr10	10720147	10720151	chr12	69330436	69330440	gridss185_9917o	9160.7	-	+
chr10	10736571	10736574	chr1	188805866	188805869	gridss18_62357h	4450.87	+	-
chr10	10758826	10758829	chr1	188968985	188968988	gridss18_44107h	3486.75	-	+
chr10	10771705	10771707	chr12	83958300	83958302	gridss185_1030o	1626.53	+	+
chr10	10821302	10821303	chr15	92002182	92002183	gridss185_13749o	3975.2	-	-
chr10	10825210	10825214	chr4	24001992	24001996	gridss74_1197h	3741.4	+	+
chr10	10842642	10842644	chr15	99104251	99104253	gridss185_1443o	12522.8	+	+
chr10	10894638	10894639	chr12	71622273	71622274	gridss185_10675o	6301.51	-	+
chr10	10894638	10894640	chr10	10895010	10895012	gridss185_13992o	991.19	-	-
chr10	10894553	10894756	chr12	78862435	78862655	gridss185_10680o	637.84	-	+
chr10	10894690	10894691	chr12	83583492	83583493	gridss185_1587o	4821.19	+	+
chr10	10894690	10894691	chr12	71622162	71622163	gridss185_6006o	2445.66	+	-
chr10	10894773	10894776	chr12	71626918	71626921	gridss185_13998o	11756.4	-	-
chr10	10894895	10894897	chr12	83948296	83948298	gridss185_1589o	2695.77	+	+
chr10	10894897	10894898	chr12	74462575	74462576	gridss185_1590o	8069.36	+	+
chr10	10894990	10894993	chr12	71622116	71622119	gridss185_14006o	3250.56	-	-
chr10	10895006	10895007	chr12	83583492	83583493	gridss185_10684o	3227.17	-	+
chr10	10895010	10895012	chr10	10894638	10894640	gridss185_13992h	991.19	-	-
chr10	10895045	10895050	chr12	78862311	78862316	gridss185_6011o	2716.15	+	-
chr10	10895077	10895080	chr12	71622271	71622274	gridss185_1596o	14366.1	+	+
chr10	10918698	10918702	chr20	579407	579411	gridss185_10764o	14646.2	-	+
chr10	10966211	10966214	chr1	186412907	186412910	gridss18_8333h	5548.21	+	+
chr10	10979010	10979013	chr13	74857569	74857572	gridss185_14333o	8450.45	-	-
chr10	10995982	10995986	chr13	74659768	74659772	gridss185_14410o	6484.05	-	-
chr10	11002069	11002071	chr1	189097276	189097278	gridss18_66871h	6186.32	+	-
chr10	11002071	11002072	chr1	189097249	189097250	gridss18_19931h	27549	+	+
chr10	12117306	12117309	chr4	23970483	23970486	gridss74_6104h	5234.45	-	+
chr10	12289421	12289426	chr3	192788049	192788054	gridss71_579h	2162.07	+	+
chr10	12466962	12466967	chr15	96118166	96118171	gridss185_15015o	13571.7	-	-
chr10	12472390	12472395	chr12	65867426	65867431	gridss185_15038o	9777.2	-	-
chr10	12475363	12475365	chr21	22882889	22882891	gridss185_7643o	12438.2	+	-
chr10	12560458	12560473	chr10	12562973	12562988	gridss185_7983o	10491.4	+	-
chr10	12562973	12562988	chr10	12560458	12560473	gridss185_7983h	10491.4	-	+
chr10	12567994	12567996	chr12	69427643	69427645	gridss185_2758o	5863.29	+	+
chr10	12948209	12948212	chr12	58010179	58010182	gridss185_11976o	3026.23	-	+
chr10	12948262	12948277	chr12	58009582	58009597	gridss185_2799o	3209.52	+	+
chr10	111572109	111572124	chr10	111578216	111578231	gridss195_1173o	604.68	+	-
chr10	111578216	111578231	chr10	111572109	111572124	gridss195_1173h	604.68	-	+
chr11	103410820	103410831	chr11	103411134	103411145	gridss208_2645o	546.01	+	-
chr11	103411134	103411145	chr11	103410820	103410831	gridss208_2645h	546.01	-	+
chr11	104267747	104267751	chr11	104273229	104273233	gridss208_2969o	547.54	+	-
chr11	104273229	104273233	chr11	104267747	104267751	gridss208_2969h	547.54	-	+
chr11	114433312	114433313	chr11	131230466	131230467	gridss209_1825o	996.99	+	-
chr11	124577512	124577513	chr1	171906007	171906008	gridss17_2321h	508.28	+	+
chr11	128682715	128682716	chr11	128683409	128683410	gridss210_2452o	700	+	-
chr11	128683409	128683410	chr11	128682715	128682716	gridss210_2452h	700	-	+
chr11	131230466	131230467	chr11	114433312	114433313	gridss209_1825h	996.99	-	+
chr12	55381673	55381681	chr12	74266161	74266169	gridss218_5376o	18088.8	-	+
chr12	55401900	55401902	chr12	65029819	65029821	gridss218_504o	17042	+	+
chr12	55736771	55736772	chr12	71604678	71604679	gridss218_7060o	22989.6	-	-
chr12	55750166	55750167	chr12	95302465	95302466	gridss218_2832o	26786.1	+	-
chr12	58006660	58006663	chr12	74429457	74429460	gridss218_7293o	34633.1	-	-
chr12	58007678	58007680	chr5	1336113	1336115	gridss94_4414h	9797.27	-	+
chr12	58008437	58008443	chr15	99490371	99490377	gridss218_5707o	4139.07	-	+
chr12	58009435	58009438	chr5	24347557	24347560	gridss96_2700h	11117.2	-	+
chr12	58009582	58009597	chr10	12948262	12948277	gridss185_2799h	3209.52	+	+
chr12	58009596	58009597	chr12	58010181	58010182	gridss218_758o	7614.68	+	+
chr12	58010070	58010073	chr3	195709592	195709595	gridss71_4407h	5155.5	-	+
chr12	58010171	58010172	chr12	58141120	58141121	gridss218_7353o	3105.35	-	-
chr12	58010179	58010182	chr10	12948209	12948212	gridss185_11976h	3026.23	+	-
chr12	58010181	58010182	chr12	58009596	58009597	gridss218_758h	7614.68	+	+
chr12	58010227	58010228	chr21	46823250	46823251	gridss218_3388o	4037.7	+	-
chr12	58010285	58010288	chr12	69320921	69320924	gridss218_3389o	4723.93	+	-
chr12	58014295	58014297	chr12	58151952	58151954	gridss218_797o	4217.36	+	+
chr12	58015973	58015985	chr12	95449934	95449946	gridss218_7402o	3830.56	-	-
chr12	58020091	58020092	chr12	93112170	93112171	gridss218_3542o	3030.23	+	-
chr12	58025030	58025031	chr9	86966988	86966989	gridss173_6917h	11030.4	-	+
chr12	58025180	58025182	chr1	185888078	185888080	gridss18_50772h	7844.87	+	-
chr12	58026619	58026624	chr10	8472487	8472492	gridss184_7981h	8475.89	-	+
chr12	58028020	58028021	chr12	58029243	58029244	gridss218_3638o	7178.11	+	-
chr12	58028051	58028052	chr12	58029255	58029256	gridss218_3649o	2816.27	+	-
chr12	58028053	58028061	chr12	58029276	58029284	gridss218_3646o	1506.21	+	-
chr12	58029243	58029244	chr12	58028020	58028021	gridss218_3638h	7178.11	-	+
chr12	58029255	58029256	chr12	58028051	58028052	gridss218_3649h	2816.27	-	+
chr12	58029276	58029284	chr12	58028053	58028061	gridss218_3646h	1506.21	-	+
chr12	58031476	58031479	chr10	10651642	10651645	gridss185_611h	14071.3	+	+
chr12	58033475	58033480	chr12	71695868	71695873	gridss218_945o	41742.1	+	+
chr12	58051279	58051280	chr12	60552127	60552128	gridss218_5908o	25179.9	-	+
chr12	58056325	58056327	chr12	69657623	69657625	gridss218_3740o	5555.53	+	-
chr12	58059121	58059125	chr12	66027420	66027424	gridss218_985o	4744.04	+	+
chr12	58122488	58122495	chr12	84157875	84157882	gridss218_6088o	13188.8	-	+
chr12	58130850	58130860	chr12	71414152	71414162	gridss218_7745o	2661.94	-	-
chr12	58137838	58137839	chr12	95333648	95333649	gridss218_4149o	4150.44	+	-
chr12	58139335	58139337	chr9	86676386	86676388	gridss173_9700h	10946	+	-
chr12	58141120	58141121	chr12	58010171	58010172	gridss218_7353h	3105.35	-	-
chr12	58141120	58141121	chr21	46823250	46823251	gridss218_7799o	9803.62	-	-
chr12	58141120	58141123	chr12	74481206	74481209	gridss218_7800o	2906.67	-	-
chr12	58147870	58147871	chr16	62852988	62852989	gridss218_6198o	17523.7	-	+
chr12	58151952	58151954	chr12	58014295	58014297	gridss218_797h	4217.36	+	+
chr12	58163845	58163864	chr12	73381266	73381285	gridss218_1342o	27705.1	+	+
chr12	58540707	58540711	chr12	80045149	80045153	gridss218_6356o	13801.8	-	+
chr12	58545123	58545125	chr12	79813556	79813558	gridss218_4534o	18025.9	+	-
chr12	58923260	58923261	chrX	31167677	31167678	gridss218_8008o	44430.4	-	-
chr12	58923659	58923664	chr16	56313783	56313788	gridss218_6404o	7202.21	-	+
chr12	58923667	58923668	chr4	28075717	28075718	gridss74_8013h	2246.88	-	+
chr12	58923667	58923670	chr4	28075730	28075733	gridss74_8015h	5939.43	-	+
chr12	58923696	58923697	chr13	74922510	74922511	gridss218_8014o	2571.86	-	-
chr12	58923727	58923730	chrX	31180815	31180818	gridss218_1423o	4036.3	+	+
chr12	58923732	58923737	chr9	80825269	80825274	gridss173_148h	3104.3	+	+
chr12	58923736	58923737	chr9	80886081	80886082	gridss173_8311h	5104.36	+	-
chr12	58923841	58923842	chr1	188640301	188640302	gridss18_13111h	15818.5	+	+
chr12	58923890	58923892	chr15	85669274	85669276	gridss218_4599o	14436.4	+	-
chr12	58923898	58923899	chr10	8436522	8436523	gridss184_13011h	4425.23	+	-
chr12	58929962	58929963	chr20	456680	456681	gridss218_6430o	8932.53	-	+
chr12	58935321	58935324	chr17	35638243	35638246	gridss218_1485o	29525.7	+	+
chr12	60540390	60540393	chr12	75549263	75549266	gridss219_24022o	59794.3	-	-
chr12	60541344	60541350	chr1	188833506	188833512	gridss18_83960h	9340.95	-	-
chr12	60542079	60542080	chr3	196713974	196713975	gridss71_7040h	12181.2	+	-
chr12	60542423	60542425	chr12	71476876	71476878	gridss219_6401o	1434.4	+	-
chr12	60545641	60545646	chr16	49744927	49744932	gridss219_6439o	12160.4	+	-
chr12	60549484	60549487	chr1	188320503	188320506	gridss18_10847h	10871.2	+	+
chr12	60552127	60552128	chr12	58051279	58051280	gridss218_5908h	25179.9	+	-
chr12	65025880	65025885	chr12	67064648	67064653	gridss219_18318o	19325.6	-	+
chr12	65029819	65029821	chr12	55401900	55401902	gridss218_504h	17042	+	+
chr12	65861915	65861917	chr12	92847297	92847299	gridss219_24458o	16509.1	-	-
chr12	65862672	65862673	chr12	84170214	84170215	gridss219_469o	9072.05	+	+
chr12	65867426	65867431	chr10	12472390	12472395	gridss185_15038h	9777.2	-	-
chr12	65892926	65892927	chr1	172540434	172540435	gridss17_45314h	5035.65	-	-
chr12	65915322	65915331	chr13	91256307	91256316	gridss219_721o	10820	+	+
chr12	65949333	65949340	chr9	83074309	83074316	gridss173_8849h	11572.1	+	-
chr12	65952863	65952864	chr15	99917560	99917561	gridss219_18750o	5454.34	-	+
chr12	65999683	65999686	chr15	91540139	91540142	gridss219_8413o	9941.04	+	-
chr12	66006338	66006344	chr12	69484689	69484695	gridss219_18936o	14619.7	-	+
chr12	66027420	66027424	chr12	58059121	58059125	gridss218_985h	4744.04	+	+
chr12	66042654	66042656	chr12	69096870	69096872	gridss219_19031o	8218.27	-	+
chr12	66044365	66044371	chr21	27510113	27510119	gridss219_8699o	8925.44	+	-
chr12	66050875	66050876	chr15	98966898	98966899	gridss219_25234o	4950.03	-	-
chr12	66050875	66050877	chr15	98966885	98966887	gridss219_19057o	4079.64	-	+
chr12	66051541	66051542	chr21	28213972	28213973	gridss219_19066o	8959.59	-	+
chr12	66053071	66053073	chr1	171814471	171814473	gridss17_28274h	16070.4	+	-
chr12	66065942	66065945	chr12	71517062	71517065	gridss219_1270o	5720.59	+	+
chr12	66205660	66205664	chr12	91671325	91671329	gridss219_19135o	6705.5	-	+
chr12	66249264	66249270	chr10	8882380	8882386	gridss184_3203h	4141.63	+	+
chr12	66504249	66504254	chr15	96278262	96278267	gridss219_25420o	2506.76	-	-
chr12	66527634	66527651	chr12	66529876	66529893	gridss219_9159o	10681.8	+	-
chr12	66529876	66529893	chr12	66527634	66527651	gridss219_9159h	10681.8	-	+
chr12	66576988	66576989	chr15	73952307	73952308	gridss219_9319o	16765.9	+	-
chr12	67061264	67061275	chr12	80042662	80042673	gridss219_25590o	17308.4	-	-
chr12	67064648	67064653	chr12	65025880	65025885	gridss219_18318h	19325.6	+	-
chr12	67861324	67861325	chr21	43109172	43109173	gridss219_19487o	19062.3	-	+
chr12	67865731	67865732	chr5	21492699	21492700	gridss96_251h	6087.47	+	+
chr12	69077572	69077579	chr12	82462402	82462409	gridss219_25826o	23964.1	-	-
chr12	69077751	69077753	chr12	84412241	84412243	gridss219_19632o	17632.6	-	+
chr12	69081628	69081629	chr1	172392004	172392005	gridss17_18524h	13684.9	-	+
chr12	69082118	69082119	chr6	114132102	114132103	gridss124_2585h	10438.4	-	+
chr12	69082576	69082578	chr1	194786566	194786568	gridss19_10854h	3916.76	-	-
chr12	69082665	69082666	chr1	180835605	180835606	gridss18_165h	671.59	+	+
chr12	69082668	69082669	chr21	28703497	28703498	gridss219_1790o	2731.57	+	+
chr12	69082971	69082975	chr15	93389588	93389592	gridss219_1792o	10198.5	+	+
chr12	69088657	69088660	chr15	92623934	92623937	gridss219_9977o	1176.72	+	-
chr12	69091943	69091948	chr1	188369746	188369751	gridss18_11420h	19366.4	+	+
chr12	69096870	69096872	chr12	66042654	66042656	gridss219_19031h	8218.27	+	-
chr12	69110016	69110019	chr4	28185868	28185871	gridss74_8339h	1656.95	-	+
chr12	69134615	69134619	chr20	14530443	14530447	gridss219_19838o	8886.41	-	+
chr12	69157851	69157856	chr3	192786915	192786920	gridss71_7870h	12092	-	-
chr12	69169751	69169761	chr12	69169992	69170002	gridss219_10598o	528	+	-
chr12	69169992	69170002	chr12	69169751	69169761	gridss219_10598h	528	-	+
chr12	69191039	69191041	chr1	172778193	172778195	gridss17_23359h	7242.33	-	+
chr12	69199594	69199595	chr4	11888369	11888370	gridss73_9036h	14166.6	+	-
chr12	69216582	69216590	chr12	73375802	73375810	gridss219_20379o	4603.7	-	+
chr12	69244500	69244502	chr9	82712632	82712634	gridss173_4089h	2909.87	-	+
chr12	69246303	69246313	chr2	156978354	156978364	gridss42_4393h	8420.53	-	+
chr12	69248228	69248229	chr4	8613431	8613432	gridss72_2326h	14251.8	+	+
chr12	69257081	69257083	chr12	84247026	84247028	gridss219_26957o	9927.74	-	-
chr12	69257767	69257772	chr12	71498528	71498533	gridss219_11719o	13140	+	-
chr12	69263980	69263981	chr15	92564387	92564388	gridss219_2960o	8723.13	+	+
chr12	69275299	69275302	chr2	158704130	158704133	gridss42_8563h	11480	-	-
chr12	69287206	69287208	chr1	178297815	178297817	gridss17_37615h	12350.9	+	-
chr12	69306484	69306487	chr1	188698570	188698573	gridss18_13696h	14382.2	+	+
chr12	69307924	69307925	chr12	75726118	75726119	gridss219_27377o	11761.8	-	-
chr12	69309029	69309034	chr15	99106810	99106815	gridss219_12579o	13130.4	+	-
chr12	69318259	69318272	chr13	91006235	91006248	gridss219_12697o	519.11	+	-
chr12	69320921	69320924	chr12	58010285	58010288	gridss218_3389h	4723.93	-	+
chr12	69323689	69323694	chr21	27800222	27800227	gridss219_21217o	9626.89	-	+
chr12	69330436	69330440	chr10	10720147	10720151	gridss185_9917h	9160.7	+	-
chr12	69340347	69340349	chr12	69477623	69477625	gridss219_3566o	4433.24	+	+
chr12	69345540	69345542	chr1	172372762	172372764	gridss17_43410h	13313.5	-	-
chr12	69366326	69366327	chr12	70375736	70375737	gridss219_21557o	4002.82	-	+
chr12	69376200	69376201	chr12	70359547	70359548	gridss219_27954o	4046.07	-	-
chr12	69379188	69379189	chr13	69884050	69884051	gridss219_21685o	2987.11	-	+
chr12	69380992	69380996	chr21	28441451	28441455	gridss219_21699o	7186.8	-	+
chr12	69383070	69383072	chr1	188934001	188934003	gridss18_17770h	2910.23	+	+
chr12	69392085	69392087	chr12	75720176	75720178	gridss219_13649o	4338.31	+	-
chr12	69392482	69392485	chr10	8494789	8494792	gridss184_2296h	3191.49	+	+
chr12	69403436	69403437	chr21	27905273	27905274	gridss219_13869o	8680.9	+	-
chr12	69410732	69410733	chr10	10579908	10579909	gridss185_9398h	13329.6	+	-
chr12	69410770	69410788	chr1	188831565	188831583	gridss18_41242h	549.07	-	+
chr12	69410824	69410826	chr1	188831710	188831712	gridss18_41243h	7078.69	-	+
chr12	69416243	69416248	chr15	85315309	85315314	gridss219_21978o	8470.27	-	+
chr12	69427643	69427645	chr10	12567994	12567996	gridss185_2758h	5863.29	+	+
chr12	69428592	69428597	chr1	186639120	186639125	gridss18_33002h	8023.15	-	+
chr12	69432332	69432333	chr12	69432373	69432374	gridss219_14351o	13833.2	+	-
chr12	69432373	69432374	chr12	69432332	69432333	gridss219_14351h	13833.2	-	+
chr12	69436792	69436794	chr21	27845343	27845345	gridss219_14427o	6912.5	+	-
chr12	69438855	69438859	chr12	69438968	69438972	gridss219_14465o	701.62	+	-
chr12	69438968	69438972	chr12	69438855	69438859	gridss219_14465h	701.62	-	+
chr12	69439384	69439386	chr12	93047134	93047136	gridss219_14485o	1767.84	+	-
chr12	69441101	69441102	chr12	93096968	93096969	gridss219_22214o	1985.49	-	+
chr12	69444306	69444308	chr10	8391893	8391895	gridss184_12854h	7055.59	+	-
chr12	69445367	69445373	chr1	188701136	188701142	gridss18_60921h	2551.29	+	-
chr12	69448416	69448420	chr12	93021540	93021544	gridss219_14635o	14395.6	+	-
chr12	69448923	69448924	chr13	89477099	89477100	gridss219_28646o	15563	-	-
chr12	69450375	69450377	chr4	9119727	9119729	gridss72_3157h	4090.78	+	+
chr12	69459355	69459356	chr12	69665207	69665208	gridss219_14757o	1435.11	+	-
chr12	69463686	69463689	chr4	28624621	28624624	gridss74_14420h	9849.88	+	-
chr12	69463784	69463785	chr13	74160977	74160978	gridss219_28733o	7139.5	-	-
chr12	69477623	69477625	chr12	69340347	69340349	gridss219_3566h	4433.24	+	+
chr12	69484689	69484695	chr12	66006338	66006344	gridss219_18936h	14619.7	+	-
chr12	69485711	69485715	chr12	69790852	69790856	gridss219_4758o	20185.4	+	+
chr12	69507186	69507187	chr12	95616555	95616556	gridss219_22502o	35029	-	+
chr12	69509248	69509249	chr12	69509285	69509286	gridss219_15057o	9077.82	+	-
chr12	69509285	69509286	chr12	69509248	69509249	gridss219_15057h	9077.82	-	+
chr12	69546414	69546420	chr4	8605489	8605495	gridss72_12305h	16669.3	+	-
chr12	69569480	69569488	chr12	69569680	69569688	gridss219_15580o	5502.87	+	-
chr12	69569680	69569688	chr12	69569480	69569488	gridss219_15580h	5502.87	-	+
chr12	69582448	69582453	chr12	69582732	69582737	gridss219_15663o	9663.49	+	-
chr12	69582732	69582737	chr12	69582448	69582453	gridss219_15663h	9663.49	-	+
chr12	69621836	69621837	chr15	96247704	96247705	gridss219_5263o	1285.39	+	+
chr12	69621952	69621954	chr1	194951131	194951133	gridss19_11566h	757.25	-	-
chr12	69657623	69657625	chr12	58056325	58056327	gridss218_3740h	5555.53	-	+
chr12	69665207	69665208	chr12	69459355	69459356	gridss219_14757h	1435.11	-	+
chr12	69765348	69765353	chr13	62181630	62181635	gridss219_30029o	598.04	-	-
chr12	69777803	69777804	chr10	7951419	7951420	gridss184_1222h	9693.34	+	+
chr12	69778786	69778787	chr1	186005871	186005872	gridss18_5161h	6208.28	+	+
chr12	69789051	69789056	chr12	83546638	83546643	gridss219_30136o	19042	-	-
chr12	69790852	69790856	chr12	69485711	69485715	gridss219_4758h	20185.4	+	+
chr12	69913717	69913718	chr7	49204874	49204875	gridss135_4827h	1270.38	+	+
chr12	70296333	70296334	chr1	188381999	188382000	gridss18_35685h	10266	-	+
chr12	70302120	70302122	chr6	114124642	114124644	gridss124_583h	11617.5	+	+
chr12	70355015	70355020	chr12	91635594	91635599	gridss220_7039o	8893.25	+	-
chr12	70359547	70359548	chr12	69376200	69376201	gridss219_27954h	4046.07	-	-
chr12	70375736	70375737	chr12	69366326	69366327	gridss219_21557h	4002.82	+	-
chr12	70397664	70397666	chr15	99202662	99202664	gridss220_18317o	13781.1	-	+
chr12	70421530	70421534	chr12	70421567	70421571	gridss220_18363o	3658	-	+
chr12	70421567	70421571	chr12	70421530	70421534	gridss220_18363h	3658	+	-
chr12	70425922	70425923	chr12	70425989	70425990	gridss220_18383o	1450.7	-	+
chr12	70425989	70425990	chr12	70425922	70425923	gridss220_18383h	1450.7	+	-
chr12	70430511	70430512	chr5	42165152	42165153	gridss98_2286h	10005.3	+	+
chr12	70524955	70524956	chr1	186409943	186409944	gridss18_31433h	9846.14	-	+
chr12	70563022	70563033	chr12	70563059	70563070	gridss220_7802o	714.7	+	-
chr12	70563059	70563070	chr12	70563022	70563033	gridss220_7802h	714.7	-	+
chr12	70575609	70575616	chr1	186597025	186597032	gridss18_56257h	11355.5	+	-
chr12	70594845	70594864	chr12	70597577	70597596	gridss220_7934o	7672.39	+	-
chr12	70597577	70597596	chr12	70594845	70594864	gridss220_7934h	7672.39	-	+
chr12	70655248	70655252	chr1	188340238	188340242	gridss18_35239h	2131.36	-	+
chr12	70694934	70694935	chr12	70705276	70705277	gridss220_8198o	2336.04	+	-
chr12	70705276	70705277	chr12	70694934	70694935	gridss220_8198h	2336.04	-	+
chr12	70708006	70708007	chr9	82566194	82566195	gridss173_8515h	4250.1	+	-
chr12	70756838	70756843	chr12	74480881	74480886	gridss220_18939o	18626.5	-	+
chr12	70757127	70757130	chr5	39427026	39427029	gridss97_6053h	14558.1	+	-
chr12	70763992	70763999	chr20	14449201	14449208	gridss220_24577o	6994.16	-	-
chr12	70792509	70792511	chr4	9394359	9394361	gridss72_9613h	7336.76	-	+
chr12	70799826	70799829	chr1	181839354	181839357	gridss18_67700h	15841.3	-	-
chr12	70805368	70805371	chr1	171816885	171816888	gridss17_1887h	15901.6	+	+
chr12	70819975	70819979	chr4	12546067	12546071	gridss73_9470h	5686.1	+	-
chr12	70863897	70863898	chr21	42620957	42620958	gridss220_25023o	8549.44	-	-
chr12	70863897	70863910	chr1	188641363	188641376	gridss18_37822h	3710.57	-	+
chr12	70864033	70864044	chr13	89286888	89286899	gridss220_9047o	10643.5	+	-
chr12	70865769	70865771	chr9	80821989	80821991	gridss173_3103h	5577.35	-	+
chr12	70865989	70865990	chr13	69928331	69928332	gridss220_1580o	7552.87	+	+
chr12	70871812	70871815	chr21	27853259	27853262	gridss220_19340o	9846.21	-	+
chr12	70876997	70876998	chr1	188379593	188379594	gridss18_58615h	10859.6	+	-
chr12	70898939	70898945	chr9	79194512	79194518	gridss172_5866h	5022.67	+	-
chr12	70921119	70921122	chr13	76509085	76509088	gridss220_25228o	16627.6	-	-
chr12	70929007	70929008	chr12	70929033	70929034	gridss220_9389o	505.27	+	-
chr12	70929033	70929034	chr12	70929007	70929008	gridss220_9389h	505.27	-	+
chr12	70944831	70944843	chr12	70944876	70944888	gridss220_1831o	626.71	+	+
chr12	70944855	70944856	chr20	410038	410039	gridss220_9543o	3645.3	+	-
chr12	70944876	70944888	chr12	70944831	70944843	gridss220_1831h	626.71	+	+
chr12	70971169	70971170	chr12	71451554	71451555	gridss220_25331o	6984.67	-	-
chr12	71023148	71023158	chr15	92408429	92408439	gridss220_9687o	6432.41	+	-
chr12	71029753	71029761	chr10	9429941	9429949	gridss184_18195h	7356.73	-	-
chr12	71242711	71242712	chr10	8917415	8917416	gridss184_3280h	11129.6	+	+
chr12	71283359	71283361	chr1	188937596	188937598	gridss18_43592h	14196.4	-	+
chr12	71294855	71294856	chr15	85326594	85326595	gridss220_10449o	14762.9	+	-
chr12	71414152	71414162	chr12	58130850	58130860	gridss218_7745h	2661.94	-	-
chr12	71451554	71451555	chr12	70971169	70971170	gridss220_25331h	6984.67	-	-
chr12	71476876	71476878	chr12	60542423	60542425	gridss219_6401h	1434.4	-	+
chr12	71478118	71478119	chr13	90980249	90980250	gridss220_2316o	3161.67	+	+
chr12	71497588	71497589	chr12	82519246	82519247	gridss220_20066o	11865.2	-	+
chr12	71498528	71498533	chr12	69257767	69257772	gridss219_11719h	13140	-	+
chr12	71514885	71514889	chr10	8975081	8975085	gridss184_14168h	5241.83	+	-
chr12	71517062	71517065	chr12	66065942	66065945	gridss219_1270h	5720.59	+	+
chr12	71604678	71604679	chr12	55736771	55736772	gridss218_7060h	22989.6	-	-
chr12	71622116	71622117	chr12	71627081	71627082	gridss220_20193o	17446.1	-	+
chr12	71622116	71622117	chr12	78862311	78862312	gridss220_26045o	10600.2	-	-
chr12	71622116	71622119	chr10	10894990	10894993	gridss185_14006h	3250.56	-	-
chr12	71622159	71622160	chr12	71622273	71622274	gridss220_20198o	1897.53	-	+
chr12	71622162	71622163	chr10	10894690	10894691	gridss185_6006h	2445.66	-	+
chr12	71622273	71622274	chr10	10894638	10894639	gridss185_10675h	6301.51	+	-
chr12	71622271	71622274	chr10	10895077	10895080	gridss185_1596h	14366.1	+	+
chr12	71622273	71622274	chr12	71622159	71622160	gridss220_20198h	1897.53	+	-
chr12	71622274	71622275	chr10	10514663	10514664	gridss185_9178h	7588.85	+	-
chr12	71622274	71622275	chr12	83583492	83583493	gridss220_2501o	4298.25	+	+
chr12	71622277	71622448	chr5	41853241	41853451	gridss98_8277h	933.32	+	-
chr12	71626918	71626919	chr12	83948295	83948296	gridss220_20218o	13369	-	+
chr12	71626918	71626921	chr10	10894773	10894776	gridss185_13998h	11756.4	-	-
chr12	71627076	71627078	chr12	78862434	78862436	gridss220_2542o	13214.4	+	+
chr12	71627081	71627082	chr12	71622116	71622117	gridss220_20193h	17446.1	+	-
chr12	71646759	71646760	chr12	74472009	74472010	gridss220_2624o	24799.3	+	+
chr12	71685083	71685087	chr12	74493069	74493073	gridss220_20292o	25507.7	-	+
chr12	71693323	71693328	chr13	66179456	66179461	gridss220_26173o	10849.5	-	-
chr12	71695868	71695873	chr12	58033475	58033480	gridss218_945h	41742.1	+	+
chr12	73362565	73362566	chr12	74478622	74478623	gridss220_26305o	55750.6	-	-
chr12	73375802	73375810	chr12	69216582	69216590	gridss219_20379h	4603.7	+	-
chr12	73381266	73381285	chr12	58163845	58163864	gridss218_1342h	27705.1	+	+
chr12	74224879	74224884	chr12	74866060	74866065	gridss220_26451o	24514.7	-	-
chr12	74246560	74246561	chr21	27886617	27886618	gridss220_12034o	13424.7	+	-
chr12	74255142	74255145	chr10	8761132	8761135	gridss184_13658h	10466.5	+	-
chr12	74255514	74255515	chr10	8481290	8481291	gridss184_17047h	3714.92	-	-
chr12	74266161	74266169	chr12	55381673	55381681	gridss218_5376h	18088.8	+	-
chr12	74318608	74318612	chr12	74971607	74971611	gridss220_20740o	13587.8	-	+
chr12	74324350	74324354	chr10	8221803	8221807	gridss184_1579h	8448.76	+	+
chr12	74343391	74343393	chr12	95318638	95318640	gridss220_3165o	20141.8	+	+
chr12	74429457	74429460	chr12	58006660	58006663	gridss218_7293h	34633.1	-	-
chr12	74459671	74459675	chr15	92303231	92303235	gridss220_26843o	12562	-	-
chr12	74462575	74462576	chr10	10894897	10894898	gridss185_1590h	8069.36	+	+
chr12	74462572	74462576	chr12	83948134	83948138	gridss220_12605o	15416.8	+	-
chr12	74472009	74472010	chr12	71646759	71646760	gridss220_2624h	24799.3	+	+
chr12	74478622	74478623	chr12	73362565	73362566	gridss220_26305h	55750.6	-	-
chr12	74480881	74480886	chr12	70756838	70756843	gridss220_18939h	18626.5	+	-
chr12	74481206	74481209	chr12	58141120	58141123	gridss218_7800h	2906.67	-	-
chr12	74481240	74481241	chr21	46823250	46823251	gridss220_12684o	1730.67	+	-
chr12	74493069	74493073	chr12	71685083	71685087	gridss220_20292h	25507.7	+	-
chr12	74866060	74866065	chr12	74224879	74224884	gridss220_26451h	24514.7	-	-
chr12	74971607	74971611	chr12	74318608	74318612	gridss220_20740h	13587.8	+	-
chr12	75549263	75549266	chr12	60540390	60540393	gridss219_24022h	59794.3	-	-
chr12	75552054	75552055	chr3	195683651	195683652	gridss71_6657h	7835.44	+	-
chr12	75558239	75558241	chr13	74907681	74907683	gridss220_4071o	13759.2	+	+
chr12	75569141	75569143	chr15	85476389	85476391	gridss220_14040o	13875.1	+	-
chr12	75572564	75572568	chr4	24195910	24195914	gridss74_6264h	3943.67	-	+
chr12	75588318	75588322	chr15	85611761	85611765	gridss220_4170o	2179.49	+	+
chr12	75593575	75593580	chr10	8483963	8483968	gridss184_17056h	11699	-	-
chr12	75593917	75593919	chr12	95315028	95315030	gridss220_14186o	2479.33	+	-
chr12	75593918	75593919	chr10	8061024	8061025	gridss184_1494h	7255.07	+	+
chr12	75601535	75601539	chr10	10518452	10518456	gridss185_3405h	8133.63	-	+
chr12	75617760	75617761	chr4	26795867	26795868	gridss74_7619h	4542.76	-	+
chr12	75617763	75617771	chr12	75617808	75617816	gridss220_4271o	3750.83	+	+
chr12	75617770	75617771	chr4	26795873	26795874	gridss74_2115h	12361.6	+	+
chr12	75617808	75617816	chr12	75617763	75617771	gridss220_4271h	3750.83	+	+
chr12	75626330	75626331	chr4	8439651	8439652	gridss72_2231h	4026.57	+	+
chr12	75626331	75626332	chr10	8755517	8755518	gridss184_13645h	10355.1	+	-
chr12	75652742	75652743	chr21	43053108	43053109	gridss220_14465o	9293.75	+	-
chr12	75660694	75660701	chr13	75372923	75372930	gridss220_21807o	6465.08	-	+
chr12	75688472	75688476	chr12	82694205	82694209	gridss220_21839o	12007	-	+
chr12	75720176	75720178	chr12	69392085	69392087	gridss219_13649h	4338.31	-	+
chr12	75726118	75726119	chr12	69307924	69307925	gridss219_27377h	11761.8	-	-
chr12	75735195	75735196	chrUn_gl000220	136008	136009	gridss220_14811o	3524.83	+	-
chr12	75735195	75735202	chr4	8785770	8785777	gridss72_2367h	10444.1	+	+
chr12	75744261	75744264	chr1	185683349	185683352	gridss18_49356h	10805.6	+	-
chr12	75783739	75783741	chr1	184116277	184116279	gridss18_2026h	17329.8	+	+
chr12	75835317	75835323	chr12	83962122	83962128	gridss220_22075o	10031.2	-	+
chr12	75842671	75842672	chr21	42168497	42168498	gridss220_22084o	14395.6	-	+
chr12	75886063	75886064	chr12	75949284	75949285	gridss220_4803o	13442	+	+
chr12	75890382	75890386	chr15	98967644	98967648	gridss220_28279o	16040.3	-	-
chr12	75916968	75916972	chr4	11842020	11842024	gridss73_4397h	7345.99	-	+
chr12	75931085	75931086	chr22	41705312	41705313	gridss220_22334o	5175.73	-	+
chr12	75931109	75931187	chr12	75931231	75931318	gridss220_15513o	928.2	+	-
chr12	75931231	75931318	chr12	75931109	75931187	gridss220_15513h	928.2	-	+
chr12	75949284	75949285	chr12	75886063	75886064	gridss220_4803h	13442	+	+
chr12	78854415	78854419	chr17	35633727	35633731	gridss220_28672o	28870.3	-	-
chr12	78856306	78856310	chr21	27980506	27980510	gridss220_16233o	7760.41	+	-
chr12	78862311	78862312	chr12	71622116	71622117	gridss220_26045h	10600.2	-	-
chr12	78862311	78862316	chr10	10895045	10895050	gridss185_6011h	2716.15	-	+
chr12	78862434	78862436	chr12	71627076	71627078	gridss220_2542h	13214.4	+	+
chr12	78862435	78862655	chr10	10894553	10894756	gridss185_10680h	637.84	+	-
chr12	78880495	78880501	chr20	1293637	1293643	gridss220_28757o	10181.3	-	-
chr12	78898630	78898632	chr1	182317203	182317205	gridss18_48049h	13498.6	+	-
chr12	78928703	78928708	chr1	186398171	186398176	gridss18_75857h	10799.6	-	-
chr12	78937296	78937297	chr1	185994484	185994485	gridss18_52039h	14017.8	+	-
chr12	78945280	78945283	chr4	11779643	11779646	gridss73_8729h	8736.04	+	-
chr12	78990813	78990814	chr21	35191991	35191992	gridss220_16915o	1986.89	+	-
chr12	78990819	78990820	chr5	24347415	24347416	gridss96_4966h	8145.53	+	-
chr12	79110764	79110768	chrX	31177543	31177547	gridss220_29055o	8976.68	-	-
chr12	79118549	79118551	chr12	95542340	95542342	gridss220_22949o	714.6	-	+
chr12	79125317	79125319	chr12	82467064	82467066	gridss220_16979o	10080.6	+	-
chr12	79186863	79186865	chr12	83957524	83957526	gridss220_17049o	1567.08	+	-
chr12	79194554	79194556	chr1	188787991	188787993	gridss18_82840h	10382.5	-	-
chr12	79200272	79200274	chr21	42633707	42633709	gridss220_5598o	9663.82	+	+
chr12	79738266	79738269	chr15	99136054	99136057	gridss220_23031o	4201.58	-	+
chr12	79788047	79788048	chr12	82601008	82601009	gridss220_5719o	10958.8	+	+
chr12	79813556	79813558	chr12	58545123	58545125	gridss218_4534h	18025.9	-	+
chr12	79823344	79823345	chr9	87232982	87232983	gridss173_7494h	6545.14	-	+
chr12	79874916	79874918	chr12	93158270	93158272	gridss220_5948o	25603.3	+	+
chr12	80042662	80042673	chr12	67061264	67061275	gridss219_25590h	17308.4	-	-
chr12	80045149	80045153	chr12	58540707	58540711	gridss218_6356h	13801.8	+	-
chr12	82462402	82462409	chr12	69077572	69077579	gridss219_25826h	23964.1	-	-
chr12	82462942	82462945	chr1	181834144	181834147	gridss18_47402h	9358.37	+	-
chr12	82467064	82467066	chr12	79125317	79125319	gridss220_16979h	10080.6	-	+
chr12	82470440	82470442	chr12	93103740	93103742	gridss221_193o	7319.61	+	+
chr12	82472977	82472980	chr4	28628099	28628102	gridss74_9915h	12287.6	-	+
chr12	82478639	82478645	chr2	158645392	158645398	gridss42_6766h	16263.4	+	-
chr12	82511245	82511250	chr10	8727570	8727575	gridss184_8867h	11033.2	-	+
chr12	82514453	82514455	chr15	100969620	100969622	gridss221_10651o	12522.6	-	-
chr12	82519246	82519247	chr12	71497588	71497589	gridss220_20066h	11865.2	+	-
chr12	82575362	82575364	chr1	188383125	188383127	gridss18_11536h	7337.43	+	+
chr12	82601008	82601009	chr12	79788047	79788048	gridss220_5719h	10958.8	+	+
chr12	82662359	82662365	chr4	26761141	26761147	gridss74_16935h	10405	-	-
chr12	82694205	82694209	chr12	75688472	75688476	gridss220_21839h	12007	+	-
chr12	83546638	83546643	chr12	69789051	69789056	gridss219_30136h	19042	-	-
chr12	83549625	83549630	chr21	28724779	28724784	gridss221_659o	11990.1	+	+
chr12	83562374	83562376	chr9	80556251	80556253	gridss173_3019h	9066.13	-	+
chr12	83565788	83565792	chr21	42717500	42717504	gridss221_11001o	7045.41	-	-
chr12	83568948	83568952	chr13	62122600	62122604	gridss221_4049o	6199.56	+	-
chr12	83572871	83572876	chr20	14401397	14401402	gridss221_705o	7767.1	+	+
chr12	83573891	83573892	chr1	188993828	188993829	gridss18_86459h	9501.26	-	-
chr12	83576130	83576134	chr5	41764013	41764017	gridss98_4070h	853.2	-	+
chr12	83578754	83578756	chr12	83785569	83785571	gridss221_11036o	8628.5	-	-
chr12	83581906	83581908	chr12	92990925	92990927	gridss221_11049o	5300.24	-	-
chr12	83583371	83583372	chr10	10514663	10514664	gridss185_12523h	15212.1	-	-
chr12	83583371	83583372	chr5	41853449	41853450	gridss98_11257h	6726.53	-	-
chr12	83583492	83583493	chr10	10895006	10895007	gridss185_10684h	3227.17	+	-
chr12	83583492	83583493	chr10	10894690	10894691	gridss185_1587h	4821.19	+	+
chr12	83583492	83583493	chr12	71622274	71622275	gridss220_2501h	4298.25	+	+
chr12	83591417	83591421	chr1	171045159	171045163	gridss17_26722h	25117.2	+	-
chr12	83665857	83665859	chr4	28900505	28900507	gridss74_4099h	6041.63	+	+
chr12	83701251	83701259	chr10	3294044	3294052	gridss184_4650h	8442.54	-	+
chr12	83702504	83702505	chr1	188539051	188539052	gridss18_59426h	8884.48	+	-
chr12	83785569	83785571	chr12	83578754	83578756	gridss221_11036h	8628.5	-	-
chr12	83812453	83812455	chr5	42175548	42175550	gridss98_9569h	9582.75	+	-
chr12	83907210	83907213	chr13	89294881	89294884	gridss221_8765o	8450.28	-	+
chr12	83938251	83938252	chr1	186280849	186280850	gridss18_75239h	5394.2	-	-
chr12	83948134	83948138	chr12	74462572	74462576	gridss220_12605h	15416.8	-	+
chr12	83948295	83948296	chr12	71626918	71626919	gridss220_20218h	13369	+	-
chr12	83948296	83948298	chr10	10894895	10894897	gridss185_1589h	2695.77	+	+
chr12	83957524	83957526	chr12	79186863	79186865	gridss220_17049h	1567.08	-	+
chr12	83958300	83958302	chr10	10771705	10771707	gridss185_1030h	1626.53	+	+
chr12	83959216	83959230	chr12	83959533	83959547	gridss221_4683o	16735.3	+	-
chr12	83959533	83959547	chr12	83959216	83959230	gridss221_4683h	16735.3	-	+
chr12	83962122	83962128	chr12	75835317	75835323	gridss220_22075h	10031.2	+	-
chr12	83965934	83965935	chr12	84056158	84056159	gridss221_1012o	11992.5	+	+
chr12	83966575	83966579	chr21	27837543	27837547	gridss221_11431o	14794.8	-	-
chr12	83988958	83988959	chr15	92404935	92404936	gridss221_8929o	6324.96	-	+
chr12	84056158	84056159	chr12	83965934	83965935	gridss221_1012h	11992.5	+	+
chr12	84088868	84088869	chr20	14467112	14467113	gridss221_11736o	4103.41	-	-
chr12	84100100	84100101	chr1	186034382	186034383	gridss18_27845h	9705.56	-	+
chr12	84100934	84100937	chr10	8015397	8015400	gridss184_12244h	10325.1	+	-
chr12	84139082	84139086	chr12	92922074	92922078	gridss221_5546o	13294	+	-
chr12	84156182	84156186	chr15	99321260	99321264	gridss221_9317o	15673.4	-	+
chr12	84157875	84157882	chr12	58122488	58122495	gridss218_6088h	13188.8	+	-
chr12	84170214	84170215	chr12	65862672	65862673	gridss219_469h	9072.05	+	+
chr12	84189541	84189543	chr12	84308712	84308714	gridss221_11909o	14949.7	-	-
chr12	84192844	84192845	chr21	42938714	42938715	gridss221_11918o	3437.56	-	-
chr12	84247026	84247028	chr12	69257081	69257083	gridss219_26957h	9927.74	-	-
chr12	84250688	84250689	chr12	84250774	84250775	gridss221_9513o	890.34	-	+
chr12	84250774	84250775	chr12	84250688	84250689	gridss221_9513h	890.34	+	-
chr12	84261317	84261318	chr20	14469966	14469967	gridss221_6018o	5665.5	+	-
chr12	84262397	84262400	chr20	14470992	14470995	gridss221_6028o	1785.98	+	-
chr12	84262399	84262400	chr20	14470105	14470106	gridss221_1774o	4436.03	+	+
chr12	84308083	84308089	chr20	14545297	14545303	gridss221_1908o	8479.94	+	+
chr12	84308712	84308714	chr12	84189541	84189543	gridss221_11909h	14949.7	-	-
chr12	84312246	84312251	chr9	86935078	86935083	gridss173_10177h	4648.98	+	-
chr12	84315166	84315168	chr1	186036578	186036580	gridss18_52621h	4152.26	+	-
chr12	84370785	84370787	chr15	99663238	99663240	gridss221_6471o	15639.8	+	-
chr12	84371096	84371101	chr1	185810621	185810626	gridss18_24704h	15193.7	-	+
chr12	84377656	84377659	chr4	9031161	9031164	gridss72_16553h	2682.27	-	-
chr12	84380520	84380523	chr1	188626392	188626395	gridss18_37679h	10994.6	-	+
chr12	84390860	84390861	chr16	63007427	63007428	gridss221_2083o	14243	+	+
chr12	84391746	84391752	chr12	95456189	95456195	gridss221_12470o	3286.04	-	-
chr12	84400392	84400396	chr1	186105882	186105886	gridss18_73762h	5523.5	-	-
chr12	84401186	84401190	chr13	74720641	74720645	gridss221_6636o	4613.54	+	-
chr12	84406861	84406864	chr3	195668805	195668808	gridss71_1263h	10287.1	+	+
chr12	84406863	84407006	chr3	195373407	195373545	gridss71_6536h	686.3	+	-
chr12	84412241	84412243	chr12	69077751	69077753	gridss219_19632h	17632.6	+	-
chr12	84484684	84484685	chr4	26763791	26763792	gridss74_16945h	513.26	-	-
chr12	84744271	84744273	chr21	42078993	42078995	gridss221_7001o	2290.55	+	-
chr12	91635594	91635599	chr12	70355015	70355020	gridss220_7039h	8893.25	-	+
chr12	91671325	91671329	chr12	66205660	66205664	gridss219_19135h	6705.5	+	-
chr12	92847297	92847299	chr12	65861915	65861917	gridss219_24458h	16509.1	-	-
chr12	92863947	92863948	chr1	183849799	183849800	gridss18_68929h	9672.49	-	-
chr12	92885313	92885314	chr21	27897397	27897398	gridss222_380o	15922.8	+	+
chr12	92886290	92886293	chr6	114146276	114146279	gridss124_6636h	8189.88	-	-
chr12	92905447	92905449	chr5	945970	945972	gridss94_3242h	10325.5	-	+
chr12	92922074	92922078	chr12	84139082	84139086	gridss221_5546h	13294	-	+
chr12	92924597	92924604	chr1	186673291	186673298	gridss18_56684h	13091.1	+	-
chr12	92933175	92933178	chr15	92736236	92736239	gridss222_10038o	13309.5	-	+
chr12	92960519	92960521	chr1	185920964	185920966	gridss18_51145h	4905.71	+	-
chr12	92990925	92990927	chr12	83581906	83581908	gridss221_11049h	5300.24	-	-
chr12	93016604	93016605	chr21	28421956	28421957	gridss222_5062o	4690.46	+	-
chr12	93021540	93021544	chr12	69448416	69448420	gridss219_14635h	14395.6	-	+
chr12	93030062	93030063	chr9	82662705	82662706	gridss173_11439h	12903.5	-	-
chr12	93038992	93038996	chr1	183844657	183844661	gridss18_1607h	10339.5	+	+
chr12	93047134	93047136	chr12	69439384	69439386	gridss219_14485h	1767.84	-	+
chr12	93050139	93050142	chr13	89454022	89454025	gridss222_1166o	2207.54	+	+
chr12	93093067	93093071	chr12	93097034	93097038	gridss222_13418o	1758.27	-	-
chr12	93096968	93096969	chr12	69441101	69441102	gridss219_22214h	1985.49	+	-
chr12	93097034	93097038	chr12	93093067	93093071	gridss222_13418h	1758.27	-	-
chr12	93103740	93103742	chr12	82470440	82470442	gridss221_193h	7319.61	+	+
chr12	93112170	93112171	chr12	58020091	58020092	gridss218_3542h	3030.23	-	+
chr12	93158270	93158272	chr12	79874916	79874918	gridss220_5948h	25603.3	+	+
chr12	95302465	95302466	chr12	55750166	55750167	gridss218_2832h	26786.1	-	+
chr12	95315028	95315030	chr12	75593917	75593919	gridss220_14186h	2479.33	-	+
chr12	95315057	95315059	chr10	8061023	8061025	gridss184_1495h	1735.92	+	+
chr12	95318638	95318640	chr12	74343391	74343393	gridss220_3165h	20141.8	+	+
chr12	95333648	95333649	chr12	58137838	58137839	gridss218_4149h	4150.44	-	+
chr12	95434140	95434145	chr6	45912857	45912862	gridss117_9952h	6166.82	-	-
chr12	95442710	95442714	chr13	80040960	80040964	gridss222_7027o	3347.45	+	-
chr12	95446975	95446978	chr1	188272500	188272503	gridss18_78149h	27101.5	-	-
chr12	95449119	95449121	chr1	188386230	188386232	gridss18_35806h	35628.1	-	+
chr12	95449934	95449946	chr12	58015973	58015985	gridss218_7402h	3830.56	-	-
chr12	95455881	95455886	chr5	24694749	24694754	gridss96_5082h	12889.1	+	-
chr12	95456189	95456195	chr12	84391746	84391752	gridss221_12470h	3286.04	-	-
chr12	95458689	95458697	chr1	182319058	182319066	gridss18_1122h	48878.6	+	+
chr12	95463602	95463603	chr1	188379027	188379028	gridss18_79363h	14117.7	-	-
chr12	95463818	95463822	chr1	188377594	188377598	gridss18_58591h	19776.2	+	-
chr12	95464502	95464504	chr1	186705063	186705065	gridss18_33341h	9810.52	-	+
chr12	95483653	95483655	chr9	80547707	80547709	gridss173_11071h	11295	-	-
chr12	95495109	95495110	chr4	24201360	24201361	gridss74_16291h	14656.4	-	-
chr12	95528628	95528631	chr10	8413946	8413949	gridss184_7730h	13406.2	-	+
chr12	95531794	95531833	chr12	95588190	95588229	gridss222_2229o	670.15	+	+
chr12	95542340	95542342	chr12	79118549	79118551	gridss220_22949h	714.6	+	-
chr12	95570542	95570546	chr9	78918703	78918707	gridss172_3597h	10093.1	-	+
chr12	95588190	95588229	chr12	95531794	95531833	gridss222_2229h	670.15	+	+
chr12	95616555	95616556	chr12	69507186	69507187	gridss219_22502h	35029	+	-
chr12	104278729	104278732	chr12	104278865	104278868	gridss223_2980o	547.01	-	+
chr12	104278865	104278868	chr12	104278729	104278732	gridss223_2980h	547.01	+	-
chr12	104359629	104359630	chr12	125801147	125801148	gridss223_3712o	689.54	-	-
chr12	125801147	125801148	chr12	104359629	104359630	gridss223_3712h	689.54	-	-
chr13	21730900	21730917	chr13	21731223	21731240	gridss229_697o	540.77	+	-
chr13	21731223	21731240	chr13	21730900	21730917	gridss229_697h	540.77	-	+
chr13	58570016	58570018	chr6	45918969	45918971	gridss117_4370h	8583.79	-	+
chr13	58573292	58573295	chr13	73728147	73728150	gridss232_1458o	885.98	+	-
chr13	58573294	58573295	chr13	73728137	73728138	gridss232_357o	5870.16	+	+
chr13	62122600	62122604	chr12	83568948	83568952	gridss221_4049h	6199.56	-	+
chr13	62181630	62181635	chr12	69765348	69765353	gridss219_30029h	598.04	-	-
chr13	62199199	62199206	chr13	62205881	62205888	gridss233_1313o	2934.82	+	-
chr13	62205881	62205888	chr13	62199199	62199206	gridss233_1313h	2934.82	-	+
chr13	62221107	62221108	chr13	81927249	81927250	gridss233_1335o	6096.25	+	-
chr13	65967418	65967419	chr13	73703523	73703524	gridss233_4508o	4253.04	-	-
chr13	66014519	66014522	chr2	4610294	4610297	gridss27_5882h	1373.73	+	-
chr13	66158639	66158643	chr21	43098543	43098547	gridss233_446o	7862.82	+	+
chr13	66179456	66179461	chr12	71693323	71693328	gridss220_26173h	10849.5	-	-
chr13	66179963	66179969	chr13	70050597	70050603	gridss233_449o	9477.55	+	+
chr13	69387515	69387520	chr15	98907389	98907394	gridss233_3849o	7566.27	-	+
chr13	69387640	69387643	chr21	28593029	28593032	gridss233_2465o	12280.5	+	-
chr13	69394691	69394694	chr13	79442008	79442011	gridss233_4784o	11092.5	-	-
chr13	69526773	69526777	chr13	74761288	74761292	gridss233_697o	12635.6	+	+
chr13	69589821	69589857	chr9	80886049	80886057	gridss173_11147h	1283.84	-	-
chr13	69589860	69589876	chr9	80886143	80886159	gridss173_11161h	36831	-	-
chr13	69589906	69589910	chr9	80886384	80886388	gridss173_3151h	6282.98	-	+
chr13	69589951	69589953	chrX	31179872	31179874	gridss233_2804o	16644.2	+	-
chr13	69589957	69589958	chr9	80886427	80886428	gridss173_3156h	15471.2	-	+
chr13	69589980	69589981	chrX	31180134	31180135	gridss233_4018o	15120.3	-	+
chr13	69589999	69590003	chr15	85669501	85669505	gridss233_4947o	592.5	-	-
chr13	69590018	69590019	chr9	80815323	80815324	gridss173_8260h	1794.76	+	-
chr13	69590033	69590034	chr9	80815320	80815321	gridss173_8257h	8968.98	+	-
chr13	69590099	69590110	chr9	80822292	80822303	gridss173_135h	31175.3	+	+
chr13	69798694	69798697	chr10	8418029	8418032	gridss184_7748h	10025.4	-	+
chr13	69808987	69808989	chr4	8392121	8392123	gridss72_7616h	14722.5	-	+
chr13	69837685	69837687	chr13	69837728	69837730	gridss233_3050o	3508.32	+	-
chr13	69837728	69837730	chr13	69837685	69837687	gridss233_3050h	3508.32	-	+
chr13	69845099	69845103	chr9	83090998	83091002	gridss173_800h	9432.14	+	+
chr13	69861991	69861993	chr10	8462196	8462198	gridss184_16972h	4530.72	-	-
chr13	69884050	69884051	chr12	69379188	69379189	gridss219_21685h	2987.11	+	-
chr13	69927164	69927169	chr15	96242386	96242391	gridss233_5081o	13174.2	-	-
chr13	69928331	69928332	chr12	70865989	70865990	gridss220_1580h	7552.87	+	+
chr13	69941049	69941051	chr13	76554942	76554944	gridss233_5085o	7199.89	-	-
chr13	69966661	69966667	chr13	69966961	69966967	gridss233_3204o	5241.76	+	-
chr13	69966961	69966967	chr13	69966661	69966667	gridss233_3204h	5241.76	-	+
chr13	70050597	70050603	chr13	66179963	66179969	gridss233_449h	9477.55	+	+
chr13	70272811	70272812	chr13	74559726	74559727	gridss234_6191o	1824.05	-	-
chr13	70290807	70290809	chr13	74592413	74592415	gridss234_1546o	3353.99	+	-
chr13	73703523	73703524	chr13	65967418	65967419	gridss233_4508h	4253.04	-	-
chr13	73728131	73728132	chr13	73728178	73728179	gridss234_215o	604	+	+
chr13	73728137	73728138	chr13	58573294	58573295	gridss232_357h	5870.16	+	+
chr13	73728147	73728150	chr13	58573292	58573295	gridss232_1458h	885.98	-	+
chr13	73728178	73728179	chr13	73728131	73728132	gridss234_215h	604	+	+
chr13	74160977	74160978	chr12	69463784	69463785	gridss219_28733h	7139.5	-	-
chr13	74251758	74251763	chr16	49815435	49815440	gridss234_373o	15590.6	+	+
chr13	74307815	74307818	chr1	171623933	171623936	gridss17_12560h	15771	-	+
chr13	74333434	74333435	chr13	75081617	75081618	gridss234_2422o	9478.61	+	-
chr13	74559726	74559727	chr13	70272811	70272812	gridss234_6191h	1824.05	-	-
chr13	74562534	74562540	chr1	186555943	186555949	gridss18_9000h	2755.66	+	+
chr13	74592413	74592415	chr13	70290807	70290809	gridss234_1546h	3353.99	-	+
chr13	74619494	74619495	chr13	89854870	89854871	gridss234_464o	4309.67	+	+
chr13	74659768	74659772	chr10	10995982	10995986	gridss185_14410h	6484.05	-	-
chr13	74662928	74662930	chr15	85294145	85294147	gridss234_2514o	9674.27	+	-
chr13	74720641	74720645	chr12	84401186	84401190	gridss221_6636h	4613.54	-	+
chr13	74732482	74732484	chr1	171221857	171221859	gridss17_12230h	8915.47	-	+
chr13	74734141	74734142	chr13	74734171	74734172	gridss234_2568o	1153.79	+	-
chr13	74734171	74734172	chr13	74734141	74734142	gridss234_2568h	1153.79	-	+
chr13	74761288	74761292	chr13	69526773	69526777	gridss233_697h	12635.6	+	+
chr13	74843748	74843749	chr20	1456559	1456560	gridss234_5384o	10796.2	-	+
chr13	74857569	74857572	chr10	10979010	10979013	gridss185_14333h	8450.45	-	-
chr13	74898741	74898744	chr1	170875611	170875614	gridss17_260h	3386.38	+	+
chr13	74903190	74903194	chr9	86735114	86735118	gridss173_1743h	7854.35	+	+
chr13	74907681	74907683	chr12	75558239	75558241	gridss220_4071h	13759.2	+	+
chr13	74922510	74922511	chr12	58923696	58923697	gridss218_8014h	2571.86	-	-
chr13	74922510	74922511	chrX	31180818	31180819	gridss234_5609o	11861.9	-	+
chr13	74924113	74924118	chr9	87537541	87537546	gridss173_2591h	14327.7	+	+
chr13	75081617	75081618	chr13	74333434	74333435	gridss234_2422h	9478.61	-	+
chr13	75175953	75175954	chr15	85470757	85470758	gridss234_1015o	13579	+	+
chr13	75358115	75358116	chr1	188054813	188054814	gridss18_33932h	9473.1	-	+
chr13	75372923	75372930	chr12	75660694	75660701	gridss220_21807h	6465.08	+	-
chr13	76107879	76107883	chr13	90808054	90808058	gridss234_5795o	10174	-	+
chr13	76192669	76192673	chr1	194816275	194816279	gridss19_1078h	11086.2	+	+
chr13	76431200	76431201	chrX	31180197	31180198	gridss234_5938o	17832.1	-	+
chr13	76432635	76432640	chr9	80825505	80825510	gridss173_8292h	15748.2	+	-
chr13	76509085	76509088	chr12	70921119	70921122	gridss220_25228h	16627.6	-	-
chr13	76512162	76512164	chr13	112718921	112718923	gridss234_4198o	9238.92	+	-
chr13	76554942	76554944	chr13	69941049	69941051	gridss233_5085h	7199.89	-	-
chr13	76557935	76557944	chr6	46415778	46415787	gridss117_7793h	7275.91	+	-
chr13	79442008	79442011	chr13	69394691	69394694	gridss233_4784h	11092.5	-	-
chr13	79486990	79486992	chr1	171174154	171174156	gridss17_27108h	10230.8	+	-
chr13	80040960	80040964	chr12	95442710	95442714	gridss222_7027h	3347.45	-	+
chr13	80060881	80060885	chr16	48615526	48615530	gridss235_596o	7460.53	+	-
chr13	81927249	81927250	chr13	62221107	62221108	gridss233_1335h	6096.25	-	+
chr13	81936721	81936723	chr4	9118991	9118993	gridss72_13206h	4646.63	+	-
chr13	87609050	87609052	chr13	99875504	99875506	gridss235_2393o	6600.98	-	+
chr13	87612551	87612555	chr13	91872633	91872637	gridss235_1399o	5640.32	+	-
chr13	89286888	89286899	chr12	70864033	70864044	gridss220_9047h	10643.5	-	+
chr13	89294881	89294884	chr12	83907210	83907213	gridss221_8765h	8450.28	+	-
chr13	89321263	89321265	chr1	188601417	188601419	gridss18_37423h	9755.08	-	+
chr13	89454022	89454025	chr12	93050139	93050142	gridss222_1166h	2207.54	+	+
chr13	89469755	89469757	chr10	8406083	8406085	gridss184_2038h	11088.5	+	+
chr13	89477099	89477100	chr12	69448923	69448924	gridss219_28646h	15563	-	-
chr13	89811744	89811747	chr21	28221607	28221610	gridss235_2059o	7613.13	+	-
chr13	89820253	89820256	chr10	8239295	8239298	gridss184_6928h	3616.19	-	+
chr13	89854870	89854871	chr13	74619494	74619495	gridss234_464h	4309.67	+	+
chr13	90758640	90758645	chr9	86077881	86077886	gridss173_5767h	11036.9	-	+
chr13	90808054	90808058	chr13	76107879	76107883	gridss234_5795h	10174	+	-
chr13	90847330	90847333	chr15	85647522	85647525	gridss236_2256o	11688.1	-	+
chr13	90857473	90857477	chr20	431513	431517	gridss236_818o	13582.8	+	-
chr13	90980249	90980250	chr12	71478118	71478119	gridss220_2316h	3161.67	+	+
chr13	91006235	91006248	chr12	69318259	69318272	gridss219_12697h	519.11	-	+
chr13	91036326	91036328	chr10	8812477	8812479	gridss184_13801h	9801.35	+	-
chr13	91251865	91251867	chr1	186264382	186264384	gridss18_75226h	14199.9	-	-
chr13	91256307	91256316	chr12	65915322	65915331	gridss219_721h	10820	+	+
chr13	91872633	91872637	chr13	87612551	87612555	gridss235_1399h	5640.32	-	+
chr13	91885125	91885129	chr13	104613483	104613487	gridss236_1154o	7839.3	+	-
chr13	99874978	99874980	chr16	58787470	58787472	gridss236_2733o	8076.37	-	+
chr13	99875504	99875506	chr13	87609050	87609052	gridss235_2393h	6600.98	+	-
chr13	104613483	104613487	chr13	91885125	91885129	gridss236_1154h	7839.3	-	+
chr13	104625256	104625257	chr16	48632657	48632658	gridss237_200o	8463.37	+	+
chr13	109805804	109805806	chr6	114148109	114148111	gridss124_2599h	5797.19	-	+
chr13	109819239	109819246	chr16	85502306	85502313	gridss237_1708o	7370.58	+	-
chr13	110177155	110177157	chr1	188780174	188780176	gridss18_61853h	1826.41	+	-
chr13	112718921	112718923	chr13	76512162	76512164	gridss234_4198h	9238.92	-	+
chr13	112723943	112723946	chr4	11972764	11972767	gridss73_1196h	13066	+	+
chr14	65360385	65360396	chr14	65363540	65363551	gridss245_1562o	622.68	+	-
chr14	65363540	65363551	chr14	65360385	65360396	gridss245_1562h	622.68	-	+
chr14	78828232	78828245	chr14	78828584	78828597	gridss246_2761o	534.65	+	-
chr14	78828584	78828597	chr14	78828232	78828245	gridss246_2761h	534.65	-	+
chr14	106149416	106149417	chr10	3284908	3284909	gridss184_4567h	501.75	-	+
chr15	73952307	73952308	chr12	66576988	66576989	gridss219_9319h	16765.9	-	+
chr15	73963978	73963979	chr15	73964012	73964013	gridss257_2894o	3284.4	-	+
chr15	73964012	73964013	chr15	73963978	73963979	gridss257_2894h	3284.4	+	-
chr15	74006434	74006435	chr1	189603149	189603150	gridss18_20258h	11785.1	+	+
chr15	85262535	85262536	chr4	25769513	25769514	gridss74_7020h	14491	-	+
chr15	85271061	85271065	chr16	62983364	62983368	gridss258_233o	13441.4	+	+
chr15	85286442	85286489	chr15	91247518	91247565	gridss258_1736o	692.23	+	-
chr15	85286509	85286530	chr15	91247585	91247606	gridss258_1737o	2358.54	+	-
chr15	85294145	85294147	chr13	74662928	74662930	gridss234_2514h	9674.27	-	+
chr15	85315309	85315314	chr12	69416243	69416248	gridss219_21978h	8470.27	+	-
chr15	85326594	85326595	chr12	71294855	71294856	gridss220_10449h	14762.9	-	+
chr15	85390454	85390455	chr15	85390482	85390483	gridss258_2016o	1032.28	+	-
chr15	85390482	85390483	chr15	85390454	85390455	gridss258_2016h	1032.28	-	+
chr15	85449729	85449742	chr15	85449762	85449775	gridss258_2236o	529.31	+	-
chr15	85449762	85449775	chr15	85449729	85449742	gridss258_2236h	529.31	-	+
chr15	85470757	85470758	chr13	75175953	75175954	gridss234_1015h	13579	+	+
chr15	85476389	85476391	chr12	75569141	75569143	gridss220_14040h	13875.1	-	+
chr15	85544477	85544479	chr3	196674622	196674624	gridss71_4944h	11157.9	-	+
chr15	85586532	85586534	chr15	99308723	99308725	gridss258_4091o	1041.45	-	+
chr15	85586889	85586896	chr21	42718338	42718345	gridss258_2545o	1737.03	+	-
chr15	85588168	85588170	chr15	92584076	92584078	gridss258_4095o	3159.54	-	+
chr15	85611761	85611765	chr12	75588318	75588322	gridss220_4170h	2179.49	+	+
chr15	85647522	85647525	chr13	90847330	90847333	gridss236_2256h	11688.1	+	-
chr15	85669228	85669229	chr15	85669531	85669532	gridss258_4187o	19470.7	-	+
chr15	85669253	85669254	chr9	80886044	80886045	gridss173_11145h	20637.3	-	-
chr15	85669274	85669276	chr12	58923890	58923892	gridss218_4599h	14436.4	-	+
chr15	85669280	85669281	chr9	80822116	80822117	gridss173_11131h	11390.2	-	-
chr15	85669379	85669380	chr16	70276091	70276092	gridss258_5079o	4836.25	-	-
chr15	85669380	85669381	chrX	31179619	31179620	gridss258_5081o	8184.06	-	-
chr15	85669473	85669476	chr10	8436522	8436525	gridss184_13012h	8542.46	+	-
chr15	85669501	85669505	chr13	69589999	69590003	gridss233_4947h	592.5	-	-
chr15	85669526	85669527	chr9	80821933	80821934	gridss173_123h	2627.45	+	+
chr15	85669526	85669527	chr9	80886403	80886404	gridss173_8327h	2069.36	+	-
chr15	85669526	85669527	chr16	70276091	70276092	gridss258_2723o	7145.53	+	-
chr15	85669528	85669532	chr9	80886457	80886461	gridss173_189h	6333.86	+	+
chr15	85669531	85669532	chr9	80826560	80826561	gridss173_154h	7427.27	+	+
chr15	85669531	85669532	chr9	80821877	80821878	gridss173_8275h	1615.99	+	-
chr15	85669531	85669532	chr9	80886056	80886057	gridss173_8308h	4067.29	+	-
chr15	85669531	85669532	chr15	85669228	85669229	gridss258_4187h	19470.7	+	-
chr15	85669531	85669532	chr16	70276199	70276200	gridss258_612o	2540.08	+	+
chr15	85669536	85669537	chr16	70276072	70276073	gridss258_2728o	17333.7	+	-
chr15	90872381	90872384	chr21	27279432	27279435	gridss259_19381o	3182.52	-	-
chr15	90873669	90873670	chr10	9241162	9241163	gridss184_3361h	4029.05	+	+
chr15	91247518	91247565	chr15	85286442	85286489	gridss258_1736h	692.23	-	+
chr15	91247585	91247606	chr15	85286509	85286530	gridss258_1737h	2358.54	-	+
chr15	91402095	91402112	chr15	91402416	91402433	gridss259_4769o	1661.17	+	-
chr15	91402416	91402433	chr15	91402095	91402112	gridss259_4769h	1661.17	-	+
chr15	91424680	91424684	chr21	28212126	28212130	gridss259_4823o	10331.6	+	-
chr15	91449828	91449833	chr10	8386690	8386695	gridss184_16694h	10804.4	-	-
chr15	91537459	91537460	chr6	46271425	46271426	gridss117_1209h	4205.07	+	+
chr15	91540139	91540142	chr12	65999683	65999686	gridss219_8413h	9941.04	-	+
chr15	91619188	91619189	chr10	10522819	10522820	gridss185_9223h	13178.5	+	-
chr15	91999225	91999230	chr9	82720615	82720620	gridss173_4121h	6628.4	-	+
chr15	91999850	91999852	chr9	87112451	87112453	gridss173_2278h	15791.7	+	+
chr15	92002182	92002183	chr10	10821302	10821303	gridss185_13749h	3975.2	-	-
chr15	92019509	92019512	chr10	5171122	5171125	gridss184_795h	4002.08	+	+
chr15	92303231	92303235	chr12	74459671	74459675	gridss220_26843h	12562	-	-
chr15	92404935	92404936	chr12	83988958	83988959	gridss221_8929h	6324.96	+	-
chr15	92408429	92408439	chr12	71023148	71023158	gridss220_9687h	6432.41	-	+
chr15	92564387	92564388	chr12	69263980	69263981	gridss219_2960h	8723.13	+	+
chr15	92568906	92568909	chr1	171049256	171049259	gridss17_11504h	13167.2	-	+
chr15	92584076	92584078	chr15	85588168	85588170	gridss258_4095h	3159.54	+	-
chr15	92623934	92623937	chr12	69088657	69088660	gridss219_9977h	1176.72	-	+
chr15	92674567	92674576	chr15	92677065	92677074	gridss259_7024o	26766	+	-
chr15	92677065	92677074	chr15	92674567	92674576	gridss259_7024h	26766	-	+
chr15	92736236	92736239	chr12	92933175	92933178	gridss222_10038h	13309.5	+	-
chr15	93292138	93292154	chr15	93292171	93292187	gridss259_9211o	2647.38	+	-
chr15	93292171	93292187	chr15	93292138	93292154	gridss259_9211h	2647.38	-	+
chr15	93389588	93389592	chr12	69082971	69082975	gridss219_1792h	10198.5	+	+
chr15	96118166	96118171	chr10	12466962	12466967	gridss185_15015h	13571.7	-	-
chr15	96145921	96145923	chr10	9647802	9647804	gridss184_3774h	6292.89	+	+
chr15	96242386	96242391	chr13	69927164	69927169	gridss233_5081h	13174.2	-	-
chr15	96247704	96247705	chr12	69621836	69621837	gridss219_5263h	1285.39	+	+
chr15	96278262	96278267	chr12	66504249	66504254	gridss219_25420h	2506.76	-	-
chr15	96317198	96317203	chr9	87118595	87118600	gridss173_10391h	9550.28	+	-
chr15	96321895	96321897	chr4	28724252	28724254	gridss74_4046h	7437.81	+	+
chr15	97061104	97061105	chr21	42708180	42708181	gridss259_21690o	4996.5	-	-
chr15	97147375	97147377	chr1	186363180	186363182	gridss18_54987h	13289.4	+	-
chr15	98815851	98815852	chr4	24225184	24225185	gridss74_6456h	12837.1	-	+
chr15	98907389	98907394	chr13	69387515	69387520	gridss233_3849h	7566.27	+	-
chr15	98907393	98907394	chr21	28593029	28593030	gridss259_11384o	5911.47	+	-
chr15	98966822	98966828	chr15	98966898	98966904	gridss259_21980o	1740.92	-	-
chr15	98966885	98966887	chr12	66050875	66050877	gridss219_19057h	4079.64	+	-
chr15	98966898	98966899	chr12	66050875	66050876	gridss219_25234h	4950.03	-	-
chr15	98966898	98966904	chr15	98966822	98966828	gridss259_21980h	1740.92	-	-
chr15	98967644	98967648	chr12	75890382	75890386	gridss220_28279h	16040.3	-	-
chr15	98970944	98970945	chr1	188380087	188380088	gridss18_79392h	11349	-	-
chr15	99011873	99011875	chr21	42446223	42446225	gridss259_2804o	11018	+	+
chr15	99076713	99076717	chr15	99076744	99076748	gridss259_18118o	1996.22	-	+
chr15	99076744	99076748	chr15	99076713	99076717	gridss259_18118h	1996.22	+	-
chr15	99097144	99097191	chr15	99097192	99097239	gridss259_12199o	1633.25	+	-
chr15	99097192	99097239	chr15	99097144	99097191	gridss259_12199h	1633.25	-	+
chr15	99104251	99104253	chr10	10842642	10842644	gridss185_1443h	12522.8	+	+
chr15	99106810	99106815	chr12	69309029	69309034	gridss219_12579h	13130.4	-	+
chr15	99130969	99130970	chr15	99130991	99130992	gridss259_12375o	3380.72	+	-
chr15	99130991	99130992	chr15	99130969	99130970	gridss259_12375h	3380.72	-	+
chr15	99136054	99136057	chr12	79738266	79738269	gridss220_23031h	4201.58	+	-
chr15	99166356	99166362	chr1	188973695	188973701	gridss18_86177h	6578.19	-	-
chr15	99202662	99202664	chr12	70397664	70397666	gridss220_18317h	13781.1	+	-
chr15	99303704	99303707	chr1	188989098	188989101	gridss18_44470h	14365	-	+
chr15	99304930	99304932	chr1	172415427	172415429	gridss17_43904h	1770.39	-	-
chr15	99308723	99308725	chr15	85586532	85586534	gridss258_4091h	1041.45	+	-
chr15	99321260	99321264	chr12	84156182	84156186	gridss221_9317h	15673.4	+	-
chr15	99331264	99331265	chr15	99331289	99331290	gridss259_13204o	3676.11	+	-
chr15	99331289	99331290	chr15	99331264	99331265	gridss259_13204h	3676.11	-	+
chr15	99469425	99469428	chr9	86973560	86973563	gridss173_6950h	12696.1	-	+
chr15	99488630	99488632	chr5	1298300	1298302	gridss94_4239h	4025.25	-	+
chr15	99490371	99490377	chr12	58008437	58008443	gridss218_5707h	4139.07	+	-
chr15	99498709	99498713	chr1	172559879	172559883	gridss17_7238h	13135.9	+	+
chr15	99663238	99663240	chr12	84370785	84370787	gridss221_6471h	15639.8	-	+
chr15	99688565	99688569	chr2	233291864	233291868	gridss50_7319h	737	-	-
chr15	99793836	99793844	chr7	20737696	20737704	gridss133_16075h	9626.73	+	-
chr15	99917560	99917561	chr12	65952863	65952864	gridss219_18750h	5454.34	+	-
chr15	100969620	100969622	chr12	82514453	82514455	gridss221_10651h	12522.6	-	-
chr15	101067077	101067078	chr16	49755621	49755622	gridss260_1681o	1499.31	-	+
chr15	101181272	101181277	chr1	183858525	183858530	gridss18_1815h	13907.9	+	+
chr16	22480318	22480383	chr9	79645556	79645662	gridss172_4846h	606.88	-	+
chr16	47688627	47688631	chr16	66535855	66535859	gridss265_1468o	1013.76	-	-
chr16	47707124	47707129	chr16	61575410	61575415	gridss265_40o	6917.35	+	+
chr16	48615526	48615530	chr13	80060881	80060885	gridss235_596h	7460.53	-	+
chr16	48632657	48632658	chr13	104625256	104625257	gridss237_200h	8463.37	+	+
chr16	49744927	49744932	chr12	60545641	60545646	gridss219_6439h	12160.4	-	+
chr16	49755621	49755622	chr15	101067077	101067078	gridss260_1681h	1499.31	+	-
chr16	49779881	49779885	chr1	171432322	171432326	gridss17_12420h	7484.44	-	+
chr16	49815435	49815440	chr13	74251758	74251763	gridss234_373h	15590.6	+	+
chr16	49820334	49820337	chr16	49991308	49991311	gridss265_1116o	9333.59	+	-
chr16	49991308	49991311	chr16	49820334	49820337	gridss265_1116h	9333.59	-	+
chr16	50020520	50020521	chr10	7865824	7865825	gridss184_11940h	7353.49	+	-
chr16	56245502	56245504	chr16	62770074	62770076	gridss266_3190o	19498	-	-
chr16	56313783	56313788	chr12	58923659	58923664	gridss218_6404h	7202.21	+	-
chr16	56313787	56313788	chr9	80825273	80825274	gridss173_149h	14859.1	+	+
chr16	58344881	58344883	chrX	31180388	31180390	gridss266_3382o	4923.93	-	-
chr16	58344968	58344971	chr9	80815480	80815483	gridss173_110h	12700.9	+	+
chr16	58345220	58345221	chr9	79673924	79673925	gridss172_8188h	18422.1	-	-
chr16	58345756	58345757	chrX	31168388	31168389	gridss266_411o	17834.3	+	+
chr16	58347493	58347494	chr9	87536995	87536996	gridss173_13585h	15951.4	-	-
chr16	58350152	58350162	chr9	86336475	86336485	gridss173_1565h	6060.19	+	+
chr16	58350161	58350162	chr16	70276445	70276446	gridss266_2128o	8349.69	+	-
chr16	58783583	58783585	chr16	61568266	61568268	gridss266_3408o	7717.02	-	-
chr16	58787470	58787472	chr13	99874978	99874980	gridss236_2733h	8076.37	+	-
chr16	61568266	61568268	chr16	58783583	58783585	gridss266_3408h	7717.02	-	-
chr16	61575410	61575415	chr16	47707124	47707129	gridss265_40h	6917.35	+	+
chr16	62770074	62770076	chr16	56245502	56245504	gridss266_3190h	19498	-	-
chr16	62852988	62852989	chr12	58147870	58147871	gridss218_6198h	17523.7	+	-
chr16	62976751	62976759	chr9	80816792	80816800	gridss173_11114h	8068.23	-	-
chr16	62983364	62983368	chr15	85271061	85271065	gridss258_233h	13441.4	+	+
chr16	62987506	62987507	chr9	79645391	79645392	gridss172_8181h	7238.49	-	-
chr16	62987579	62987585	chr1	188640035	188640041	gridss18_60244h	9167.89	+	-
chr16	62997932	62997934	chr9	80822077	80822079	gridss173_11130h	10654.9	-	-
chr16	62997954	62997955	chr16	70276199	70276200	gridss267_2425o	5255.02	-	+
chr16	62998052	62998058	chr9	80886332	80886338	gridss173_179h	7713.35	+	+
chr16	62998098	62998100	chr9	80822084	80822086	gridss173_8279h	10410.1	+	-
chr16	63000895	63000896	chr10	8215625	8215626	gridss184_16246h	26154.8	-	-
chr16	63007427	63007428	chr12	84390860	84390861	gridss221_2083h	14243	+	+
chr16	63030805	63030806	chr1	189095138	189095139	gridss18_19866h	3841.04	+	+
chr16	66535855	66535859	chr16	47688627	47688631	gridss265_1468h	1013.76	-	-
chr16	66543832	66543838	chr16	85506743	85506749	gridss267_341o	6910.39	+	+
chr16	70276072	70276073	chr15	85669536	85669537	gridss258_2728h	17333.7	-	+
chr16	70276091	70276092	chr15	85669526	85669527	gridss258_2723h	7145.53	-	+
chr16	70276091	70276092	chr15	85669379	85669380	gridss258_5079h	4836.25	-	-
chr16	70276091	70276092	chrX	31179709	31179710	gridss268_1862o	5112.82	-	+
chr16	70276091	70276093	chr9	80821896	80821898	gridss173_11128h	1258.47	-	-
chr16	70276199	70276200	chr9	80886341	80886342	gridss173_183h	9169.66	+	+
chr16	70276199	70276200	chr15	85669531	85669532	gridss258_612h	2540.08	+	+
chr16	70276199	70276200	chr16	62997954	62997955	gridss267_2425h	5255.02	+	-
chr16	70276228	70276231	chr9	80826558	80826561	gridss173_155h	3083.08	+	+
chr16	70276445	70276446	chr16	58350161	58350162	gridss266_2128h	8349.69	-	+
chr16	70276445	70276450	chr9	86336355	86336360	gridss173_12487h	5208.27	-	-
chr16	70277664	70277672	chr9	79645555	79645563	gridss172_1568h	11397.1	+	+
chr16	85502306	85502313	chr13	109819239	109819246	gridss237_1708h	7370.58	-	+
chr16	85506743	85506749	chr16	66543832	66543838	gridss267_341h	6910.39	+	+
chr17	32064663	32064665	chr1	88972823	88972825	gridss8_2131h	525.82	+	+
chr17	35633727	35633731	chr12	78854415	78854419	gridss220_28672h	28870.3	-	-
chr17	35638243	35638246	chr12	58935321	58935324	gridss218_1485h	29525.7	+	+
chr17	41382046	41382047	chr17	41382052	41382053	gridss275_581o	1051.88	+	-
chr17	41382052	41382053	chr17	41382046	41382047	gridss275_581h	1051.88	-	+
chr17	41401193	41401198	chr6	27162913	27162918	gridss115_5111h	897.29	+	-
chr17	41401320	41401321	chr9	140405480	140405481	gridss179_51h	503.2	+	+
chr17	78834685	78834686	chr17	78835351	78835352	gridss278_2103o	659.35	+	-
chr17	78835351	78835352	chr17	78834685	78834686	gridss278_2103h	659.35	-	+
chr20	410038	410039	chr12	70944855	70944856	gridss220_9543h	3645.3	-	+
chr20	431513	431517	chr13	90857473	90857477	gridss236_818h	13582.8	-	+
chr20	456680	456681	chr12	58929962	58929963	gridss218_6430h	8932.53	+	-
chr20	579407	579411	chr10	10918698	10918702	gridss185_10764h	14646.2	+	-
chr20	1176719	1176720	chr9	79649846	79649847	gridss172_8183h	1991.21	-	-
chr20	1176719	1176720	chr9	86543111	86543112	gridss173_12508h	3739.67	-	-
chr20	1178339	1178344	chr9	87536971	87536976	gridss173_2588h	2144.05	+	+
chr20	1293637	1293643	chr12	78880495	78880501	gridss220_28757h	10181.3	-	-
chr20	1389142	1389146	chr20	1390814	1390818	gridss301_1403o	15600.2	+	-
chr20	1390814	1390818	chr20	1389142	1389146	gridss301_1403h	15600.2	-	+
chr20	1456559	1456560	chr13	74843748	74843749	gridss234_5384h	10796.2	+	-
chr20	14363224	14363232	chr10	3372670	3372678	gridss184_5018h	7251.95	-	+
chr20	14400898	14400904	chr10	10509731	10509737	gridss185_3351h	10299.7	-	+
chr20	14401397	14401402	chr12	83572871	83572876	gridss221_705h	7767.1	+	+
chr20	14449201	14449208	chr12	70763992	70763999	gridss220_24577h	6994.16	-	-
chr20	14467112	14467113	chr12	84088868	84088869	gridss221_11736h	4103.41	-	-
chr20	14469966	14469967	chr12	84261317	84261318	gridss221_6018h	5665.5	-	+
chr20	14470103	14470106	chr20	14471043	14471046	gridss302_173o	1770.18	+	+
chr20	14470105	14470106	chr12	84262399	84262400	gridss221_1774h	4436.03	+	+
chr20	14470992	14470995	chr12	84262397	84262400	gridss221_6028h	1785.98	-	+
chr20	14471043	14471046	chr20	14470103	14470106	gridss302_173h	1770.18	+	+
chr20	14477259	14477262	chr4	28359215	28359218	gridss74_9210h	11034.3	-	+
chr20	14478090	14478095	chr21	38072282	38072287	gridss302_1444o	9763.12	+	-
chr20	14516178	14516181	chrX	31186293	31186296	gridss302_3122o	9131.87	-	+
chr20	14530443	14530447	chr12	69134615	69134619	gridss219_19838h	8886.41	+	-
chr20	14532283	14532284	chr1	186666265	186666266	gridss18_33179h	9069.04	-	+
chr20	14537623	14537625	chr1	188784393	188784395	gridss18_61898h	18371.5	+	-
chr20	14545297	14545303	chr12	84308083	84308089	gridss221_1908h	8479.94	+	+
chr20	14614961	14614962	chr5	1418641	1418642	gridss94_1339h	19702.6	+	+
chr20	60570623	60570638	chr20	60570943	60570958	gridss307_250o	586.63	+	-
chr20	60570943	60570958	chr20	60570623	60570638	gridss307_250h	586.63	-	+
chr21	21086736	21086739	chr5	24713862	24713865	gridss96_2946h	14605.3	-	+
chr21	21086894	21086899	chr5	21501152	21501157	gridss96_265h	1980.01	+	+
chr21	22882889	22882891	chr10	12475363	12475365	gridss185_7643h	12438.2	-	+
chr21	22887484	22887487	chr4	8151633	8151636	gridss72_11634h	8365.81	+	-
chr21	23868327	23868331	chr1	172833835	172833839	gridss17_23717h	6733.37	-	+
chr21	23871349	23871351	chr5	21519027	21519029	gridss96_283h	3468.18	+	+
chr21	27279432	27279435	chr15	90872381	90872384	gridss259_19381h	3182.52	-	-
chr21	27316763	27316767	chr21	42144948	42144952	gridss310_128o	3607.92	+	+
chr21	27483998	27484001	chr5	41911584	41911587	gridss98_11279h	10602.2	-	-
chr21	27496138	27496142	chr1	185829017	185829021	gridss18_50296h	9754.45	+	-
chr21	27510113	27510119	chr12	66044365	66044371	gridss219_8699h	8925.44	-	+
chr21	27511192	27511197	chr1	185750225	185750230	gridss18_69739h	15087	-	-
chr21	27526088	27526092	chr5	41500831	41500835	gridss98_7542h	23559.1	+	-
chr21	27632860	27632865	chr21	28242887	28242892	gridss310_205o	7283.87	+	+
chr21	27787346	27787349	chr1	188314348	188314351	gridss18_78708h	12060.4	-	-
chr21	27800222	27800227	chr12	69323689	69323694	gridss219_21217h	9626.89	+	-
chr21	27837543	27837547	chr12	83966575	83966579	gridss221_11431h	14794.8	-	-
chr21	27839379	27839380	chr9	79467685	79467686	gridss172_1541h	14491.1	+	+
chr21	27845343	27845345	chr12	69436792	69436794	gridss219_14427h	6912.5	-	+
chr21	27853259	27853262	chr12	70871812	70871815	gridss220_19340h	9846.21	+	-
chr21	27886617	27886618	chr12	74246560	74246561	gridss220_12034h	13424.7	-	+
chr21	27897397	27897398	chr12	92885313	92885314	gridss222_380h	15922.8	+	+
chr21	27905273	27905274	chr12	69403436	69403437	gridss219_13869h	8680.9	-	+
chr21	27980506	27980510	chr12	78856306	78856310	gridss220_16233h	7760.41	-	+
chr21	28012100	28012102	chr1	185713619	185713621	gridss18_2500h	1618.11	+	+
chr21	28212126	28212130	chr15	91424680	91424684	gridss259_4823h	10331.6	-	+
chr21	28213972	28213973	chr12	66051541	66051542	gridss219_19066h	8959.59	+	-
chr21	28221607	28221610	chr13	89811744	89811747	gridss235_2059h	7613.13	-	+
chr21	28222638	28222642	chr9	86544626	86544630	gridss173_5862h	1590.06	-	+
chr21	28242887	28242892	chr21	27632860	27632865	gridss310_205h	7283.87	+	+
chr21	28421956	28421957	chr12	93016604	93016605	gridss222_5062h	4690.46	-	+
chr21	28441451	28441455	chr12	69380992	69380996	gridss219_21699h	7186.8	+	-
chr21	28585314	28585316	chr9	86016153	86016155	gridss173_12316h	7702.87	-	-
chr21	28593029	28593032	chr13	69387640	69387643	gridss233_2465h	12280.5	-	+
chr21	28593029	28593030	chr15	98907393	98907394	gridss259_11384h	5911.47	-	+
chr21	28593843	28593844	chr1	171411873	171411874	gridss17_27350h	3907.76	+	-
chr21	28596168	28596175	chr5	1229088	1229095	gridss94_8147h	10863.6	+	-
chr21	28606565	28606567	chr21	42740188	42740190	gridss310_3052o	8647.91	-	+
chr21	28657152	28657153	chr1	194931161	194931162	gridss19_8548h	5714.63	+	-
chr21	28684502	28684508	chr1	186026285	186026291	gridss18_27714h	8593.37	-	+
chr21	28695014	28695016	chr21	28695047	28695049	gridss310_2487o	786.63	+	-
chr21	28695027	28695031	chr21	28695060	28695064	gridss310_2489o	683.13	+	-
chr21	28695047	28695049	chr21	28695014	28695016	gridss310_2487h	786.63	-	+
chr21	28695060	28695064	chr21	28695027	28695031	gridss310_2489h	683.13	-	+
chr21	28703497	28703498	chr1	180835558	180835559	gridss18_47181h	2063.93	+	-
chr21	28703497	28703498	chr1	194786566	194786567	gridss19_8047h	6657.19	+	-
chr21	28703497	28703498	chr12	69082668	69082669	gridss219_1790h	2731.57	+	+
chr21	28714250	28714251	chr4	28136469	28136470	gridss74_8323h	11426.6	-	+
chr21	28724779	28724784	chr12	83549625	83549630	gridss221_659h	11990.1	+	+
chr21	35191991	35191992	chr12	78990813	78990814	gridss220_16915h	1986.89	-	+
chr21	35192083	35192084	chr5	24347415	24347416	gridss96_4967h	764.75	+	-
chr21	38072282	38072287	chr20	14478090	14478095	gridss302_1444h	9763.12	-	+
chr21	38116547	38116554	chr1	189603252	189603259	gridss18_67224h	4190.62	+	-
chr21	38116553	38116554	chr5	134210064	134210065	gridss107_6101h	6447.95	+	-
chr21	42078993	42078995	chr12	84744271	84744273	gridss221_7001h	2290.55	-	+
chr21	42113540	42113544	chr4	28414493	28414497	gridss74_9296h	1892.27	-	+
chr21	42120152	42120154	chr1	186469296	186469298	gridss18_55628h	3632.75	+	-
chr21	42144948	42144952	chr21	27316763	27316767	gridss310_128h	3607.92	+	+
chr21	42148197	42148201	chr6	114125207	114125211	gridss124_6601h	12616.7	-	-
chr21	42168497	42168498	chr12	75842671	75842672	gridss220_22084h	14395.6	+	-
chr21	42372131	42372133	chr4	28437502	28437504	gridss74_18170h	6997.91	-	-
chr21	42402881	42402896	chr21	42403203	42403218	gridss312_899o	9020.39	+	-
chr21	42403203	42403218	chr21	42402881	42402896	gridss312_899h	9020.39	-	+
chr21	42446223	42446225	chr15	99011873	99011875	gridss259_2804h	11018	+	+
chr21	42620957	42620958	chr1	188641317	188641318	gridss18_81039h	3708.45	-	-
chr21	42620957	42620958	chr12	70863897	70863898	gridss220_25023h	8549.44	-	-
chr21	42633707	42633709	chr12	79200272	79200274	gridss220_5598h	9663.82	+	+
chr21	42708180	42708181	chr15	97061104	97061105	gridss259_21690h	4996.5	-	-
chr21	42717500	42717504	chr12	83565788	83565792	gridss221_11001h	7045.41	-	-
chr21	42718338	42718345	chr15	85586889	85586896	gridss258_2545h	1737.03	-	+
chr21	42732084	42732085	chr5	39837923	39837924	gridss97_6199h	12505.7	+	-
chr21	42740188	42740190	chr21	28606565	28606567	gridss310_3052h	8647.91	+	-
chr21	42846160	42846171	chr4	8440738	8440749	gridss72_7731h	6700.34	-	+
chr21	42862852	42862856	chr21	42879185	42879189	gridss312_1219o	8217.59	+	-
chr21	42879185	42879189	chr21	42862852	42862856	gridss312_1219h	8217.59	-	+
chr21	42882108	42882111	chr5	21496356	21496359	gridss96_4527h	7808.12	+	-
chr21	42917595	42917596	chr1	188191814	188191815	gridss18_78049h	1894.51	-	-
chr21	42938714	42938715	chr12	84192844	84192845	gridss221_11918h	3437.56	-	-
chr21	43005559	43005560	chr2	1659881	1659882	gridss27_2400h	799.63	-	+
chr21	43053108	43053109	chr12	75652742	75652743	gridss220_14465h	9293.75	-	+
chr21	43089415	43089418	chr21	43089458	43089461	gridss312_1489o	3440.44	+	-
chr21	43089458	43089461	chr21	43089415	43089418	gridss312_1489h	3440.44	-	+
chr21	43098543	43098547	chr13	66158639	66158643	gridss233_446h	7862.82	+	+
chr21	43100302	43100305	chr9	86040919	86040922	gridss173_12365h	12881.8	-	-
chr21	43109172	43109173	chr12	67861324	67861325	gridss219_19487h	19062.3	+	-
chr21	46823250	46823251	chr12	58010227	58010228	gridss218_3388h	4037.7	-	+
chr21	46823250	46823251	chr12	58141120	58141121	gridss218_7799h	9803.62	-	-
chr21	46823250	46823251	chr12	74481240	74481241	gridss220_12684h	1730.67	-	+
chr21	46823576	46823579	chr3	196722416	196722419	gridss71_1740h	18459.8	+	+
chr22	24274141	24274144	chr22	24311297	24311300	gridss316_1445o	916.15	+	-
chr22	24311297	24311300	chr22	24274141	24274144	gridss316_1445h	916.15	-	+
chr22	33295757	33295772	chr22	33296076	33296091	gridss317_1269o	746.09	+	-
chr22	33296076	33296091	chr22	33295757	33295772	gridss317_1269h	746.09	-	+
chr22	37744387	37744391	chr22	37750028	37750032	gridss317_2673o	881.03	+	-
chr22	37750028	37750032	chr22	37744387	37744391	gridss317_2673h	881.03	-	+
chr22	41705312	41705313	chr12	75931085	75931086	gridss220_22334h	5175.73	+	-
chrX	25127540	25127542	chr8	43092874	43092876	gridss152_3757h	543.1	-	-
chrX	31167677	31167678	chr12	58923260	58923261	gridss218_8008h	44430.4	-	-
chrX	31168388	31168389	chr16	58345756	58345757	gridss266_411h	17834.3	+	+
chrX	31177543	31177547	chr12	79110764	79110768	gridss220_29055h	8976.68	-	-
chrX	31179613	31179614	chr9	80886371	80886372	gridss173_3150h	19594.5	-	+
chrX	31179619	31179620	chr15	85669380	85669381	gridss258_5081h	8184.06	-	-
chrX	31179709	31179710	chr16	70276091	70276092	gridss268_1862h	5112.82	+	-
chrX	31179872	31179873	chr9	80886156	80886157	gridss173_11164h	15399.6	-	-
chrX	31179872	31179874	chr13	69589951	69589953	gridss233_2804h	16644.2	-	+
chrX	31180019	31180022	chr9	80886318	80886321	gridss173_3147h	13647	-	+
chrX	31180026	31180028	chr9	80822117	80822119	gridss173_8282h	12207.2	+	-
chrX	31180134	31180135	chr9	80880623	80880624	gridss173_176h	767.29	+	+
chrX	31180134	31180135	chr13	69589980	69589981	gridss233_4018h	15120.3	+	-
chrX	31180197	31180198	chr13	76431200	76431201	gridss234_5938h	17832.1	+	-
chrX	31180237	31180239	chr9	80886351	80886353	gridss173_184h	14134	+	+
chrX	31180388	31180389	chr9	80815482	80815483	gridss173_3081h	6116.87	-	+
chrX	31180388	31180390	chr16	58344881	58344883	gridss266_3382h	4923.93	-	-
chrX	31180526	31180531	chr9	87536826	87536831	gridss173_13583h	3021.75	-	-
chrX	31180815	31180818	chr12	58923727	58923730	gridss218_1423h	4036.3	+	+
chrX	31180818	31180819	chr13	74922510	74922511	gridss234_5609h	11861.9	+	-
chrX	31180865	31180867	chr1	188732584	188732586	gridss18_61317h	2699.25	+	-
chrX	31186293	31186296	chr20	14516178	14516181	gridss302_3122h	9131.87	+	-
chrX	31187931	31187934	chr4	28195361	28195364	gridss74_17525h	11692.5	-	-
chrX	31193639	31193646	chr10	3264357	3264364	gridss184_11053h	35098.8	+	-
chrX	146750647	146750648	chr5	42089635	42089636	gridss98_8937h	704.95	+	-
chrM	0	1	chrM	16570	16571	gridss342_335o	135542	-	+
chrM	3207	3225	chrM	3279	3281	gridss342_44o	588.09	+	-
chrM	3279	3281	chrM	3207	3225	gridss342_44h	588.09	-	+
chrM	10762	10790	chrM	10889	10894	gridss342_148o	716.13	+	-
chrM	10889	10894	chrM	10762	10790	gridss342_148h	716.13	-	+
chrM	11548	11562	chrM	11640	11642	gridss342_167o	668.15	+	-
chrM	11640	11642	chrM	11548	11562	gridss342_167h	668.15	-	+
chrM	14115	14135	chrM	14207	14252	gridss342_251o	601.36	+	-
chrM	14207	14252	chrM	14115	14135	gridss342_251h	601.36	-	+
chrM	15374	15382	chrM	15454	15509	gridss342_290o	892.65	+	-
chrM	15454	15509	chrM	15374	15382	gridss342_290h	892.65	-	+
chrM	16001	16003	chrM	16032	16100	gridss342_321o	560.21	+	-
chrM	16032	16100	chrM	16001	16003	gridss342_321h	560.21	-	+
chrM	16570	16571	chrM	0	1	gridss342_335h	135542	+	-
chrUn_gl000219	56396	56397	chr9	68425909	68425910	gridss171_756h	539.47	-	+
chrUn_gl000220	119463	119464	chrUn_gl000220	119500	119501	gridss352_74o	848.57	+	-
chrUn_gl000220	119500	119501	chrUn_gl000220	119463	119464	gridss352_74h	848.57	-	+
chrUn_gl000220	120314	120316	chrUn_gl000220	120474	120476	gridss352_110o	3623.79	+	-
chrUn_gl000220	120474	120476	chrUn_gl000220	120314	120316	gridss352_110h	3623.79	-	+
chrUn_gl000220	124694	124698	chrUn_gl000220	124733	124737	gridss352_679o	4102.1	-	+
chrUn_gl000220	124733	124737	chrUn_gl000220	124694	124698	gridss352_679h	4102.1	+	-
chrUn_gl000220	127915	127916	chrUn_gl000220	127951	127952	gridss352_231o	1275.51	+	-
chrUn_gl000220	127951	127952	chrUn_gl000220	127915	127916	gridss352_231h	1275.51	-	+
chrUn_gl000220	129157	129158	chrUn_gl000220	129215	129216	gridss352_305o	1037.65	+	-
chrUn_gl000220	129215	129216	chrUn_gl000220	129157	129158	gridss352_305h	1037.65	-	+
chrUn_gl000220	132098	132099	chrUn_gl000220	132162	132163	gridss352_386o	2298	+	-
chrUn_gl000220	132162	132163	chrUn_gl000220	132098	132099	gridss352_386h	2298	-	+
chrUn_gl000220	132625	132626	chrUn_gl000220	132651	132652	gridss352_416o	847	+	-
chrUn_gl000220	132651	132652	chrUn_gl000220	132625	132626	gridss352_416h	847	-	+
chrUn_gl000220	133037	133038	chrUn_gl000220	133098	133099	gridss352_451o	2102.33	+	-
chrUn_gl000220	133098	133099	chrUn_gl000220	133037	133038	gridss352_451h	2102.33	-	+
chrUn_gl000220	136008	136009	chr12	75735195	75735196	gridss220_14811h	3524.83	-	+
chrUn_gl000220	136008	136009	chr4	8785646	8785647	gridss72_16352h	1427.47	-	-
chrUn_gl000220	136114	136115	chr10	8061833	8061834	gridss184_1507h	2288.85	+	+
